# Supplementary material for: 15N-, 13C- and 1H-NMR Spectroscopy Characterization and Growth Inhibitory Potency of a Combi-Molecule Synthesized by Acetylation of an Unstable Monoalkyltriazene
Source: Molecules. 2017 Jul 19;22(7):1183. doi: 10.3390/molecules22071183 (PMC6152079; doi:10.3390/molecules22071183)
Supplement: Supplementary file 1 [file molecules-22-01183-s001.cif]

data_publication_text
_publ_requested_journal          Molecules
_publ_contact_author_name        'Bertrand Jean-Claude'
_publ_contact_author_address     
;Research Institute of the McGill University Health Center
1001 Decarie Blvd.
Montreal, QC H4A 3J1
;
_publ_contact_author_email       bertrandj.jean-claude@mcgill.ca
_publ_contact_author_phone       (514)934-1934
loop_
_publ_author_name
_publ_author_address
'Mouhri, Zhor Senhaji'
;Research Institute of the McGill University Health Center
1001 Decarie Blvd.
Montreal, QC H4A 3J1
;
'Goodfellow, Elliot'
;Research Institute of the McGill University Health Center
1001 Decarie Blvd.
Montreal, QC H4A 3J1
;
'Kelley, Steven P.'
;Department of Chemistry
801 Sherbrooke St. W.
Montreal, QC H3A 0B8, Canada
;
'Stein, Robin'
;Department of Chemistry
801 Sherbrooke St. W.
Montreal, QC H3A 0B8, Canada
;
'Rogers, Robin D.'
;Department of Chemistry
801 Sherbrooke St. W.
Montreal, QC H3A 0B8, Canada
;
'Jean-Claude, Bertrand'
;Research Institute of the McGill University Health Center
1001 Decarie Blvd.
Montreal, QC H4A 3J1
;

 
data_s1_a 
  
_audit_creation_method            'SHELXL-2014/7' 
_shelx_SHELXL_version_number      '2014/7' 
_chemical_name_systematic         ? 
_chemical_name_common             ? 
_chemical_melting_point           ? 
_chemical_formula_moiety          ? 
_chemical_formula_sum 
 'C16.50 H15 N4.50 O3.50' 
_chemical_formula_weight          332.33 
  
loop_ 
 _atom_type_symbol 
 _atom_type_description 
 _atom_type_scat_dispersion_real 
 _atom_type_scat_dispersion_imag 
 _atom_type_scat_source 
 'C'  'C'   0.0033   0.0016 
 'International Tables Vol C Tables 4.2.6.8 and 6.1.1.4' 
 'H'  'H'   0.0000   0.0000 
 'International Tables Vol C Tables 4.2.6.8 and 6.1.1.4' 
 'N'  'N'   0.0061   0.0033 
 'International Tables Vol C Tables 4.2.6.8 and 6.1.1.4' 
 'O'  'O'   0.0106   0.0060 
 'International Tables Vol C Tables 4.2.6.8 and 6.1.1.4' 
  
_space_group_crystal_system       monoclinic 
_space_group_IT_number            7 
_space_group_name_H-M_alt         'P c' 
_space_group_name_Hall            'P -2yc' 
  
_shelx_space_group_comment 
; 
The symmetry employed for this shelxl refinement is uniquely defined 
by the following loop, which should always be used as a source of 
symmetry information in preference to the above space-group names. 
They are only intended as comments. 
; 
  
loop_ 
 _space_group_symop_operation_xyz 
 'x, y, z' 
 'x, -y, z+1/2' 
  
_cell_length_a                    13.856(3) 
_cell_length_b                    4.9842(9) 
_cell_length_c                    23.836(5) 
_cell_angle_alpha                 90 
_cell_angle_beta                  100.651(6) 
_cell_angle_gamma                 90 
_cell_volume                      1617.8(5) 
_cell_formula_units_Z             4 
_cell_measurement_temperature     298(2) 
_cell_measurement_reflns_used     2287 
_cell_measurement_theta_min       2.49 
_cell_measurement_theta_max       25.61 
  
_exptl_crystal_description        needle 
_exptl_crystal_colour             yellow 
_exptl_crystal_density_meas       ? 
_exptl_crystal_density_method     'not measured' 
_exptl_crystal_density_diffrn     1.364 
_exptl_crystal_F_000              694 
_exptl_transmission_factor_min    ? 
_exptl_transmission_factor_max    ? 
_exptl_crystal_size_max           0.220 
_exptl_crystal_size_mid           0.080 
_exptl_crystal_size_min           0.010 
_exptl_absorpt_coefficient_mu     0.099 
_shelx_estimated_absorpt_T_min    0.979 
_shelx_estimated_absorpt_T_max    0.999 
_exptl_absorpt_correction_type    multi-scan
_exptl_absorpt_correction_T_min   0.5562 
_exptl_absorpt_correction_T_max   0.7454 
_exptl_absorpt_process_details    'Bruker AXScale' 
_exptl_absorpt_special_details    ? 
_diffrn_ambient_temperature       298(2) 
_diffrn_radiation_wavelength      0.71073 
_diffrn_radiation_type            MoK\a 
_diffrn_source                    ? 
_diffrn_measurement_device_type   'Bruker APEX-II CCD' 
_diffrn_measurement_method        '\f and \w scans' 
_diffrn_detector_area_resol_mean  ? 
_diffrn_reflns_number             24669 
_diffrn_reflns_av_unetI/netI      0.2612 
_diffrn_reflns_av_R_equivalents   0.2463 
_diffrn_reflns_limit_h_min        -17 
_diffrn_reflns_limit_h_max        17 
_diffrn_reflns_limit_k_min        -6 
_diffrn_reflns_limit_k_max        5 
_diffrn_reflns_limit_l_min        -29 
_diffrn_reflns_limit_l_max        29 
_diffrn_reflns_theta_min          2.494 
_diffrn_reflns_theta_max          26.435 
_diffrn_reflns_theta_full         25.242 
_diffrn_measured_fraction_theta_max   0.995 
_diffrn_measured_fraction_theta_full  0.998 
_diffrn_reflns_Laue_measured_fraction_max    0.995 
_diffrn_reflns_Laue_measured_fraction_full   0.998 
_diffrn_reflns_point_group_measured_fraction_max   0.990 
_diffrn_reflns_point_group_measured_fraction_full  0.996 
_reflns_number_total              6617 
_reflns_number_gt                 2613 
_reflns_threshold_expression      'I > 2\s(I)' 
_reflns_Friedel_coverage          0.989 
_reflns_Friedel_fraction_max      0.986 
_reflns_Friedel_fraction_full     0.994 
  
_reflns_special_details 
; 
 Reflections were merged by SHELXL according to the crystal 
 class for the calculation of statistics and refinement. 
  
 _reflns_Friedel_fraction is defined as the number of unique 
 Friedel pairs measured divided by the number that would be 
 possible theoretically, ignoring centric projections and 
 systematic absences. 
; 
  
_computing_data_collection        'Bruker APEX2' 
_computing_cell_refinement        'Bruker SAINT' 
_computing_data_reduction         'Bruker SAINT' 
_computing_structure_solution     'SHELXS-97 (Sheldrick 2008)' 
_computing_structure_refinement 'SHELXL-2014/7 (Sheldrick, 2014)' 
_computing_molecular_graphics     'Bruker SHELXTL' 
_computing_publication_material   'Bruker SHELXTL' 
_refine_special_details           ? 
_refine_ls_structure_factor_coef  Fsqd 
_refine_ls_matrix_type            full 
_refine_ls_weighting_scheme       calc 
_refine_ls_weighting_details 
'w=1/[\s^2^(Fo^2^)+(0.1461P)^2^+1.6018P] where P=(Fo^2^+2Fc^2^)/3' 
_atom_sites_solution_primary      iterative 
_atom_sites_solution_secondary    difmap 
_atom_sites_solution_hydrogens    geom 
_refine_ls_hydrogen_treatment     constr 
_refine_ls_extinction_method      none 
_refine_ls_extinction_coef        . 
_chemical_absolute_configuration  ? 
_refine_ls_number_reflns          6617 
_refine_ls_number_parameters      448 
_refine_ls_number_restraints      380 
_refine_ls_R_factor_all           0.2820 
_refine_ls_R_factor_gt            0.1434 
_refine_ls_wR_factor_ref          0.3900 
_refine_ls_wR_factor_gt           0.3046 
_refine_ls_goodness_of_fit_ref    1.025 
_refine_ls_restrained_S_all       1.009 
_refine_ls_shift/su_max           0.000 
_refine_ls_shift/su_mean          0.000 
  
loop_ 
 _atom_site_label 
 _atom_site_type_symbol 
 _atom_site_fract_x 
 _atom_site_fract_y 
 _atom_site_fract_z 
 _atom_site_U_iso_or_equiv 
 _atom_site_adp_type 
 _atom_site_occupancy 
 _atom_site_site_symmetry_order 
 _atom_site_calc_flag 
 _atom_site_refinement_flags_posn 
 _atom_site_refinement_flags_adp 
 _atom_site_refinement_flags_occupancy 
 _atom_site_disorder_assembly 
 _atom_site_disorder_group 
O1B O 0.5468(8) 0.845(2) 0.3932(5) 0.052(3) Uani 1 1 d . U . . . 
O1A O 0.4950(8) 0.527(2) 0.5243(4) 0.046(3) Uani 1 1 d . U . . . 
O2B O 0.6562(8) 1.035(2) 0.5795(4) 0.046(3) Uani 1 1 d . U . . . 
O2A O 0.6144(9) 0.678(2) 0.7102(5) 0.061(3) Uani 1 1 d . U . . . 
O3B O 0.9638(15) 2.251(4) 0.2351(8) 0.135(8) Uani 1 1 d . U . . . 
C14A C 0.080(2) -0.716(6) 0.5075(13) 0.126(9) Uani 1 1 d . U . . . 
H14A H 0.1117 -0.5470 0.5047 0.189 Uiso 1 1 calc R U . . . 
H14B H 0.0164 -0.7151 0.4832 0.189 Uiso 1 1 calc R U . . . 
H14C H 0.1190 -0.8574 0.4957 0.189 Uiso 1 1 calc R U . . . 
N1A N 0.5499(8) 0.592(2) 0.6184(5) 0.036(3) Uani 1 1 d . U . . . 
H1AA H 0.5866 0.7173 0.6091 0.043 Uiso 1 1 calc R U . . . 
N1B N 0.6040(9) 0.951(3) 0.4855(5) 0.039(3) Uani 1 1 d . U . . . 
H1BA H 0.5653 0.8312 0.4948 0.046 Uiso 1 1 calc R U . . . 
N2A N 0.2365(12) -0.325(3) 0.6357(7) 0.062(4) Uani 1 1 d . U . . . 
N2B N 0.8630(10) 1.775(3) 0.3685(6) 0.055(4) Uani 1 1 d . U . . . 
N3A N 0.1869(11) -0.447(3) 0.5927(7) 0.064(4) Uani 1 1 d . U . . . 
N3B N 0.8518(11) 1.832(3) 0.3161(6) 0.060(4) Uani 1 1 d . U . . . 
N4B N 0.9163(12) 2.014(3) 0.3043(7) 0.068(4) Uani 1 1 d . U . . . 
N4A N 0.1231(11) -0.630(3) 0.6071(8) 0.070(4) Uani 1 1 d . U . . . 
C1B C 0.6598(10) 1.083(3) 0.5279(7) 0.032(3) Uani 1 1 d . U . . . 
C1A C 0.4922(12) 0.468(3) 0.5724(7) 0.041(4) Uani 1 1 d . U . . . 
C2A C 0.4284(11) 0.250(3) 0.5900(6) 0.036(3) Uani 1 1 d . U . . . 
C2B C 0.7239(10) 1.298(3) 0.5140(6) 0.033(3) Uani 1 1 d . U . . . 
C3B C 0.7265(9) 1.347(3) 0.4553(6) 0.026(3) Uani 1 1 d . U . . . 
C3A C 0.4261(10) 0.205(3) 0.6477(6) 0.031(3) Uani 1 1 d . U . . . 
C4B C 0.6674(10) 1.194(2) 0.4123(6) 0.029(3) Uani 1 1 d . U . . . 
C4A C 0.4947(11) 0.342(3) 0.6924(6) 0.036(3) Uani 1 1 d . U . . . 
C5B C 0.6021(11) 0.989(3) 0.4284(6) 0.034(3) Uani 1 1 d . U . . . 
C5A C 0.5598(11) 0.553(3) 0.6762(6) 0.035(3) Uani 1 1 d . U . . . 
C6B C 0.7821(11) 1.445(3) 0.5552(7) 0.043(4) Uani 1 1 d . U . . . 
H6BA H 0.7808 1.4120 0.5935 0.052 Uiso 1 1 calc R U . . . 
C6A C 0.3670(13) 0.120(3) 0.5477(8) 0.052(4) Uani 1 1 d . U . . . 
H6AA H 0.3679 0.1574 0.5096 0.062 Uiso 1 1 calc R U . . . 
C7B C 0.8428(12) 1.643(3) 0.5406(7) 0.043(4) Uani 1 1 d . U . . . 
H7BA H 0.8795 1.7461 0.5694 0.052 Uiso 1 1 calc R U . . . 
C7A C 0.3024(12) -0.073(3) 0.5625(7) 0.046(4) Uani 1 1 d . U . . . 
H7AA H 0.2603 -0.1631 0.5337 0.056 Uiso 1 1 calc R U . . . 
C8A C 0.2995(11) -0.134(3) 0.6193(7) 0.039(3) Uani 1 1 d . U . . . 
C8B C 0.8504(11) 1.692(3) 0.4851(7) 0.039(3) Uani 1 1 d . U . . . 
H8BA H 0.8947 1.8187 0.4765 0.047 Uiso 1 1 calc R U . . . 
C9B C 0.7892(10) 1.544(3) 0.4401(7) 0.032(3) Uani 1 1 d . U . . . 
C9A C 0.3628(10) 0.002(3) 0.6629(6) 0.031(3) Uani 1 1 d . U . . . 
C10B C 0.7930(11) 1.584(3) 0.3821(7) 0.037(3) Uani 1 1 d . U . . . 
C10A C 0.3651(13) -0.047(3) 0.7212(7) 0.049(4) Uani 1 1 d . U . . . 
H10A H 0.3235 -0.1765 0.7318 0.059 Uiso 1 1 calc R U . . . 
C11A C 0.4275(13) 0.093(3) 0.7634(7) 0.050(4) Uani 1 1 d . U . . . 
H11A H 0.4260 0.0617 0.8017 0.060 Uiso 1 1 calc R U . . . 
C11B C 0.7321(12) 1.431(3) 0.3406(7) 0.045(4) Uani 1 1 d . U . . . 
H11B H 0.7332 1.4582 0.3021 0.054 Uiso 1 1 calc R U . . . 
C12B C 0.6694(12) 1.237(3) 0.3569(7) 0.042(4) Uani 1 1 d . U . . . 
H12A H 0.6289 1.1367 0.3291 0.051 Uiso 1 1 calc R U . . . 
C12A C 0.4921(12) 0.280(3) 0.7481(7) 0.046(4) Uani 1 1 d . U . . . 
H12B H 0.5356 0.3661 0.7769 0.056 Uiso 1 1 calc R U . . . 
C13B C 0.9075(16) 2.071(4) 0.2451(9) 0.075(5) Uani 1 1 d . U . . . 
C13A C 0.0687(16) -0.762(5) 0.5664(12) 0.085(6) Uani 1 1 d . U . . . 
O3A O 0.0159(14) -0.953(4) 0.5720(9) 0.135(7) Uani 1 1 d . U . . . 
C14B C 0.834(2) 1.951(6) 0.2070(11) 0.120(10) Uani 1 1 d . U . . . 
H14D H 0.7944 1.8425 0.2274 0.180 Uiso 1 1 calc R U . . . 
H14E H 0.8618 1.8397 0.1813 0.180 Uiso 1 1 calc R U . . . 
H14F H 0.7933 2.0860 0.1856 0.180 Uiso 1 1 calc R U . . . 
C15A C 0.1140(17) -0.676(4) 0.6688(10) 0.090(7) Uani 1 1 d . U . . . 
H15A H 0.1781 -0.7028 0.6915 0.135 Uiso 1 1 calc R U . . . 
H15B H 0.0743 -0.8321 0.6713 0.135 Uiso 1 1 calc R U . . . 
H15C H 0.0838 -0.5226 0.6827 0.135 Uiso 1 1 calc R U . . . 
C15B C 0.9911(18) 2.139(5) 0.3492(10) 0.100(8) Uani 1 1 d . U . . . 
H15D H 1.0255 2.2762 0.3324 0.150 Uiso 1 1 calc R U . . . 
H15E H 1.0369 2.0054 0.3664 0.150 Uiso 1 1 calc R U . . . 
H15F H 0.9594 2.2181 0.3778 0.150 Uiso 1 1 calc R U . . . 
C3S C 0.3741(19) 0.380(5) 0.3790(12) 0.110(8) Uani 1 1 d . U . . . 
H3SA H 0.3530 0.2069 0.3639 0.165 Uiso 1 1 calc R U . . . 
H3SB H 0.4047 0.3630 0.4184 0.165 Uiso 1 1 calc R U . . . 
H3SC H 0.4204 0.4537 0.3577 0.165 Uiso 1 1 calc R U . . . 
N1S N 0.2870(15) 0.563(4) 0.3741(9) 0.090(5) Uani 1 1 d . U . . . 
O1S O 0.2165(18) 0.855(5) 0.4178(10) 0.160(9) Uani 1 1 d . U . . . 
C2S C 0.285(3) 0.685(7) 0.4190(13) 0.135(11) Uani 1 1 d . U . . . 
C1S C 0.221(3) 0.548(8) 0.3240(15) 0.169(14) Uani 1 1 d . U . . . 
H1SA H 0.2559 0.5390 0.2927 0.254 Uiso 1 1 calc R U . . . 
H1SB H 0.1797 0.7033 0.3199 0.254 Uiso 1 1 calc R U . . . 
H1SC H 0.1818 0.3895 0.3242 0.254 Uiso 1 1 calc R U . . . 
  
loop_ 
 _atom_site_aniso_label 
 _atom_site_aniso_U_11 
 _atom_site_aniso_U_22 
 _atom_site_aniso_U_33 
 _atom_site_aniso_U_23 
 _atom_site_aniso_U_13 
 _atom_site_aniso_U_12 
O1B 0.058(7) 0.055(7) 0.038(6) 0.002(5) -0.003(5) -0.033(6) 
O1A 0.067(7) 0.041(6) 0.033(5) -0.010(4) 0.015(5) -0.028(5) 
O2B 0.070(8) 0.032(6) 0.037(5) 0.000(4) 0.008(5) -0.016(5) 
O2A 0.078(8) 0.056(8) 0.042(6) -0.005(5) -0.004(5) -0.032(6) 
O3B 0.152(15) 0.152(15) 0.104(12) 0.051(10) 0.034(10) -0.060(12) 
C14A 0.15(2) 0.083(18) 0.141(14) -0.012(12) 0.024(13) -0.019(17) 
N1A 0.048(7) 0.023(7) 0.038(5) -0.006(4) 0.010(5) -0.009(5) 
N1B 0.042(7) 0.033(7) 0.039(5) 0.007(4) 0.001(5) -0.015(5) 
N2A 0.067(8) 0.042(8) 0.079(9) -0.012(6) 0.021(7) -0.023(6) 
N2B 0.055(8) 0.060(8) 0.053(7) 0.010(6) 0.018(6) -0.006(6) 
N3A 0.063(8) 0.041(8) 0.091(9) -0.015(6) 0.022(7) -0.016(6) 
N3B 0.072(8) 0.057(8) 0.057(7) 0.014(6) 0.032(6) 0.012(6) 
N4B 0.073(9) 0.063(9) 0.074(8) 0.023(6) 0.030(6) 0.005(7) 
N4A 0.060(9) 0.050(9) 0.101(10) -0.009(7) 0.017(7) -0.022(7) 
C1B 0.023(7) 0.031(7) 0.040(6) 0.006(5) 0.000(5) 0.000(5) 
C1A 0.064(9) 0.025(7) 0.036(6) -0.014(5) 0.019(5) -0.008(6) 
C2A 0.044(7) 0.025(7) 0.039(6) -0.008(5) 0.012(5) -0.001(5) 
C2B 0.039(7) 0.024(6) 0.037(6) -0.004(4) 0.008(5) -0.003(5) 
C3B 0.028(6) 0.010(6) 0.038(5) -0.001(4) 0.004(4) 0.004(4) 
C3A 0.036(7) 0.018(6) 0.036(5) 0.000(4) 0.002(5) 0.002(5) 
C4B 0.038(7) 0.011(6) 0.036(6) -0.002(4) 0.007(5) 0.001(5) 
C4A 0.035(7) 0.034(7) 0.037(6) -0.003(5) -0.001(5) -0.005(5) 
C5B 0.040(7) 0.027(7) 0.032(6) 0.004(5) -0.004(5) -0.015(6) 
C5A 0.043(8) 0.026(7) 0.037(6) -0.008(5) 0.006(5) -0.002(5) 
C6B 0.050(8) 0.040(8) 0.037(7) 0.000(5) 0.004(6) -0.018(6) 
C6A 0.067(9) 0.040(9) 0.048(8) -0.005(6) 0.007(6) -0.017(7) 
C7B 0.053(9) 0.037(8) 0.035(7) -0.002(5) -0.001(6) -0.018(7) 
C7A 0.047(8) 0.037(8) 0.056(7) -0.011(6) 0.011(6) -0.004(6) 
C8A 0.046(8) 0.020(7) 0.054(7) -0.005(5) 0.015(5) -0.004(5) 
C8B 0.048(8) 0.021(7) 0.047(6) 0.001(5) 0.004(6) -0.006(6) 
C9B 0.033(7) 0.017(6) 0.047(6) 0.002(4) 0.006(5) 0.003(5) 
C9A 0.035(7) 0.018(6) 0.039(6) 0.001(4) 0.009(5) 0.006(5) 
C10B 0.037(7) 0.025(7) 0.050(6) 0.008(5) 0.010(5) 0.009(5) 
C10A 0.059(10) 0.047(9) 0.042(7) 0.002(5) 0.013(6) -0.012(7) 
C11A 0.068(10) 0.042(9) 0.040(8) 0.004(6) 0.011(7) -0.010(7) 
C11B 0.052(8) 0.041(8) 0.045(8) 0.008(6) 0.014(6) -0.012(7) 
C12B 0.051(9) 0.036(8) 0.039(7) 0.001(5) 0.007(6) -0.005(6) 
C12A 0.053(9) 0.049(9) 0.036(7) -0.005(6) 0.003(6) -0.012(7) 
C13B 0.090(12) 0.076(12) 0.073(9) 0.025(7) 0.053(8) 0.009(8) 
C13A 0.060(11) 0.056(11) 0.133(12) -0.018(9) 0.000(9) -0.021(8) 
O3A 0.122(13) 0.101(12) 0.172(16) -0.004(10) 0.005(12) -0.063(11) 
C14B 0.143(18) 0.14(2) 0.083(13) 0.031(11) 0.035(11) -0.043(16) 
C15A 0.088(16) 0.077(15) 0.110(12) -0.006(9) 0.031(10) -0.042(12) 
C15B 0.099(14) 0.117(18) 0.087(12) 0.010(11) 0.027(10) -0.024(13) 
C3S 0.109(14) 0.087(15) 0.13(2) -0.048(13) 0.010(13) -0.018(11) 
N1S 0.098(12) 0.072(12) 0.103(13) -0.029(9) 0.028(9) -0.027(8) 
O1S 0.162(18) 0.153(19) 0.161(19) -0.029(15) 0.021(15) 0.042(14) 
C2S 0.150(19) 0.14(2) 0.107(15) -0.043(13) 0.011(13) 0.036(17) 
C1S 0.14(2) 0.22(3) 0.135(17) -0.046(18) -0.015(15) 0.00(2) 
  
_geom_special_details 
; 
 All esds (except the esd in the dihedral angle between two l.s. planes) 
 are estimated using the full covariance matrix.  The cell esds are taken 
 into account individually in the estimation of esds in distances, angles 
 and torsion angles; correlations between esds in cell parameters are only 
 used when they are defined by crystal symmetry.  An approximate (isotropic) 
 treatment of cell esds is used for estimating esds involving l.s. planes. 
; 
  
loop_ 
 _geom_bond_atom_site_label_1 
 _geom_bond_atom_site_label_2 
 _geom_bond_distance 
 _geom_bond_site_symmetry_2 
 _geom_bond_publ_flag 
O1B C5B 1.252(17) . ? 
O1A C1A 1.190(17) . ? 
O2B C1B 1.263(17) . ? 
O2A C5A 1.180(17) . ? 
O3B C13B 1.24(2) . ? 
C14A C13A 1.46(4) . ? 
N1A C5A 1.373(18) . ? 
N1A C1A 1.378(19) . ? 
N1B C1B 1.326(19) . ? 
N1B C5B 1.370(18) . ? 
N2A N3A 1.277(19) . ? 
N2A C8A 1.40(2) . ? 
N2B N3B 1.263(18) . ? 
N2B C10B 1.437(19) . ? 
N3A N4A 1.36(2) . ? 
N3B N4B 1.34(2) . ? 
N4B C13B 1.42(2) . ? 
N4B C15B 1.48(3) . ? 
N4A C13A 1.29(3) . ? 
N4A C15A 1.52(3) . ? 
C1B C2B 1.47(2) . ? 
C1A C2A 1.51(2) . ? 
C2A C6A 1.36(2) . ? 
C2A C3A 1.40(2) . ? 
C2B C6B 1.36(2) . ? 
C2B C3B 1.427(19) . ? 
C3B C9B 1.404(19) . ? 
C3B C4B 1.411(18) . ? 
C3A C9A 1.43(2) . ? 
C3A C4A 1.460(19) . ? 
C4B C12B 1.34(2) . ? 
C4B C5B 1.462(19) . ? 
C4A C12A 1.37(2) . ? 
C4A C5A 1.48(2) . ? 
C6B C7B 1.38(2) . ? 
C6A C7A 1.40(2) . ? 
C7B C8B 1.37(2) . ? 
C7A C8A 1.39(2) . ? 
C8A C9A 1.40(2) . ? 
C8B C9B 1.44(2) . ? 
C9B C10B 1.41(2) . ? 
C9A C10A 1.41(2) . ? 
C10B C11B 1.40(2) . ? 
C10A C11A 1.39(2) . ? 
C11A C12A 1.39(2) . ? 
C11B C12B 1.40(2) . ? 
C13B C14B 1.37(3) . ? 
C13A O3A 1.22(2) . ? 
C3S N1S 1.50(3) . ? 
N1S C2S 1.24(3) . ? 
N1S C1S 1.36(3) . ? 
O1S C2S 1.27(3) . ? 
  
loop_ 
 _geom_angle_atom_site_label_1 
 _geom_angle_atom_site_label_2 
 _geom_angle_atom_site_label_3 
 _geom_angle 
 _geom_angle_site_symmetry_1 
 _geom_angle_site_symmetry_3 
 _geom_angle_publ_flag 
C5A N1A C1A 132.1(13) . . ? 
C1B N1B C5B 126.3(13) . . ? 
N3A N2A C8A 111.7(15) . . ? 
N3B N2B C10B 114.1(15) . . ? 
N2A N3A N4A 113.3(16) . . ? 
N2B N3B N4B 113.3(16) . . ? 
N3B N4B C13B 114.0(18) . . ? 
N3B N4B C15B 122.6(16) . . ? 
C13B N4B C15B 123.4(17) . . ? 
C13A N4A N3A 117.9(19) . . ? 
C13A N4A C15A 120.7(17) . . ? 
N3A N4A C15A 121.4(15) . . ? 
O2B C1B N1B 121.8(13) . . ? 
O2B C1B C2B 119.5(13) . . ? 
N1B C1B C2B 118.6(14) . . ? 
O1A C1A N1A 122.5(15) . . ? 
O1A C1A C2A 124.8(15) . . ? 
N1A C1A C2A 112.7(14) . . ? 
C6A C2A C3A 121.8(14) . . ? 
C6A C2A C1A 117.2(15) . . ? 
C3A C2A C1A 120.7(14) . . ? 
C6B C2B C3B 119.7(13) . . ? 
C6B C2B C1B 122.1(14) . . ? 
C3B C2B C1B 118.2(13) . . ? 
C9B C3B C4B 119.6(13) . . ? 
C9B C3B C2B 120.1(13) . . ? 
C4B C3B C2B 120.2(12) . . ? 
C2A C3A C9A 119.3(13) . . ? 
C2A C3A C4A 120.7(13) . . ? 
C9A C3A C4A 119.7(13) . . ? 
C12B C4B C3B 120.9(13) . . ? 
C12B C4B C5B 119.7(13) . . ? 
C3B C4B C5B 119.4(13) . . ? 
C12A C4A C3A 118.0(14) . . ? 
C12A C4A C5A 122.7(14) . . ? 
C3A C4A C5A 119.2(13) . . ? 
O1B C5B N1B 119.0(13) . . ? 
O1B C5B C4B 123.8(14) . . ? 
N1B C5B C4B 117.2(12) . . ? 
O2A C5A N1A 123.2(15) . . ? 
O2A C5A C4A 122.7(15) . . ? 
N1A C5A C4A 114.1(13) . . ? 
C2B C6B C7B 120.6(15) . . ? 
C2A C6A C7A 118.9(16) . . ? 
C8B C7B C6B 121.9(15) . . ? 
C8A C7A C6A 121.8(16) . . ? 
C7A C8A N2A 123.4(15) . . ? 
C7A C8A C9A 119.3(14) . . ? 
N2A C8A C9A 117.3(15) . . ? 
C7B C8B C9B 119.3(14) . . ? 
C3B C9B C10B 119.3(13) . . ? 
C3B C9B C8B 118.2(14) . . ? 
C10B C9B C8B 122.4(14) . . ? 
C8A C9A C10A 123.1(15) . . ? 
C8A C9A C3A 118.9(14) . . ? 
C10A C9A C3A 118.0(14) . . ? 
C11B C10B C9B 119.3(14) . . ? 
C11B C10B N2B 123.0(14) . . ? 
C9B C10B N2B 117.7(14) . . ? 
C11A C10A C9A 121.8(16) . . ? 
C12A C11A C10A 119.6(16) . . ? 
C10B C11B C12B 120.3(16) . . ? 
C4B C12B C11B 120.6(16) . . ? 
C4A C12A C11A 122.8(15) . . ? 
O3B C13B C14B 127(2) . . ? 
O3B C13B N4B 113(2) . . ? 
C14B C13B N4B 118.9(19) . . ? 
O3A C13A N4A 126(3) . . ? 
O3A C13A C14A 113(2) . . ? 
N4A C13A C14A 120(2) . . ? 
C2S N1S C1S 132(3) . . ? 
C2S N1S C3S 112(3) . . ? 
C1S N1S C3S 115(2) . . ? 
N1S C2S O1S 116(3) . . ? 
  
_refine_diff_density_max    0.496 
_refine_diff_density_min   -0.345 
_refine_diff_density_rms    0.089 
  
_shelx_res_file 
; 
  
    s1_a.res created by SHELXL-2014/7 
  
  
TITL s1_a.res in Pc 
REM Old TITL s1 in Pc 
  
REM SHELXT solution in Pc 
REM R1 0.302,  Rweak 0.158,  Alpha 0.078,  Orientation as input 
REM Flack x = -2.382 ( 2.345 ) from Parsons' quotients 
REM Formula found by SHELXT:  C30 N7 O8 
  
CELL  0.71073  13.8562   4.9842  23.8363   90.000  100.651   90.000 
ZERR    4.000   0.0027   0.0009   0.0047    0.000    0.006    0.000 
LATT -1 
SYMM X, -Y, 1/2+Z 
SFAC C H N O 
UNIT 66 60 18 14 
TEMP 25 
SIZE 0.22 0.08 0.01 
L.S. 100 
ACTA 
LIST 6 
FMAP 2 
PLAN 20 
RIGU 
WGHT    0.146100    1.601800 
FVAR       0.44717 
O1B   4    0.546775    0.845074    0.393205    11.00000    0.05794    0.05482 = 
         0.03840    0.00213   -0.00309   -0.03279 
O1A   4    0.495013    0.526930    0.524348    11.00000    0.06682    0.04085 = 
         0.03323   -0.01007    0.01520   -0.02756 
O2B   4    0.656189    1.034813    0.579540    11.00000    0.07003    0.03157 = 
         0.03694    0.00019    0.00780   -0.01568 
O2A   4    0.614423    0.678161    0.710191    11.00000    0.07786    0.05600 = 
         0.04180   -0.00456   -0.00430   -0.03206 
O3B   4    0.963847    2.250505    0.235108    11.00000    0.15213    0.15248 = 
         0.10392    0.05111    0.03427   -0.06029 
C14A  1    0.079913   -0.716421    0.507456    11.00000    0.15256    0.08287 = 
         0.14089   -0.01208    0.02405   -0.01914 
AFIX 137 
H14A  2    0.111654   -0.546983    0.504705    11.00000   -1.50000 
H14B  2    0.016404   -0.715136    0.483152    11.00000   -1.50000 
H14C  2    0.119047   -0.857370    0.495736    11.00000   -1.50000 
AFIX   0 
N1A   3    0.549903    0.591862    0.618376    11.00000    0.04760    0.02272 = 
         0.03832   -0.00564    0.01005   -0.00922 
AFIX  43 
H1AA  2    0.586606    0.717317    0.609133    11.00000   -1.20000 
AFIX   0 
N1B   3    0.604029    0.951455    0.485545    11.00000    0.04211    0.03289 = 
         0.03868    0.00689    0.00148   -0.01521 
AFIX  43 
H1BA  2    0.565304    0.831210    0.494804    11.00000   -1.20000 
AFIX   0 
N2A   3    0.236473   -0.324819    0.635741    11.00000    0.06741    0.04156 = 
         0.07937   -0.01230    0.02105   -0.02282 
N2B   3    0.863016    1.774606    0.368490    11.00000    0.05538    0.06047 = 
         0.05280    0.00979    0.01826   -0.00603 
N3A   3    0.186930   -0.446664    0.592728    11.00000    0.06311    0.04144 = 
         0.09073   -0.01513    0.02157   -0.01596 
N3B   3    0.851803    1.831810    0.316051    11.00000    0.07226    0.05726 = 
         0.05700    0.01394    0.03228    0.01172 
N4B   3    0.916307    2.013851    0.304268    11.00000    0.07308    0.06310 = 
         0.07407    0.02342    0.03024    0.00534 
N4A   3    0.123102   -0.630494    0.607134    11.00000    0.06020    0.05031 = 
         0.10130   -0.00865    0.01716   -0.02223 
C1B   1    0.659809    1.082601    0.527938    11.00000    0.02324    0.03051 = 
         0.04013    0.00586   -0.00043   -0.00038 
C1A   1    0.492246    0.467775    0.572385    11.00000    0.06423    0.02518 = 
         0.03622   -0.01410    0.01922   -0.00797 
C2A   1    0.428377    0.250083    0.589995    11.00000    0.04369    0.02549 = 
         0.03937   -0.00794    0.01155   -0.00120 
C2B   1    0.723883    1.297588    0.513993    11.00000    0.03879    0.02394 = 
         0.03699   -0.00375    0.00820   -0.00343 
C3B   1    0.726502    1.346555    0.455308    11.00000    0.02832    0.01011 = 
         0.03779   -0.00141    0.00416    0.00409 
C3A   1    0.426137    0.204724    0.647707    11.00000    0.03638    0.01801 = 
         0.03614   -0.00023    0.00232    0.00237 
C4B   1    0.667383    1.193825    0.412325    11.00000    0.03821    0.01124 = 
         0.03639   -0.00183    0.00697    0.00144 
C4A   1    0.494737    0.342056    0.692370    11.00000    0.03522    0.03405 = 
         0.03708   -0.00268   -0.00137   -0.00468 
C5B   1    0.602095    0.988905    0.428419    11.00000    0.03982    0.02693 = 
         0.03157    0.00368   -0.00434   -0.01546 
C5A   1    0.559786    0.552921    0.676177    11.00000    0.04315    0.02557 = 
         0.03654   -0.00845    0.00644   -0.00241 
C6B   1    0.782067    1.445019    0.555205    11.00000    0.05039    0.04000 = 
         0.03737    0.00043    0.00439   -0.01807 
AFIX  43 
H6BA  2    0.780843    1.411962    0.593466    11.00000   -1.20000 
AFIX   0 
C6A   1    0.367036    0.119613    0.547731    11.00000    0.06705    0.03953 = 
         0.04754   -0.00531    0.00738   -0.01654 
AFIX  43 
H6AA  2    0.367876    0.157418    0.509618    11.00000   -1.20000 
AFIX   0 
C7B   1    0.842779    1.642925    0.540645    11.00000    0.05319    0.03726 = 
         0.03547   -0.00220   -0.00057   -0.01766 
AFIX  43 
H7BA  2    0.879540    1.746055    0.569418    11.00000   -1.20000 
AFIX   0 
C7A   1    0.302367   -0.073207    0.562549    11.00000    0.04713    0.03699 = 
         0.05558   -0.01100    0.01113   -0.00439 
AFIX  43 
H7AA  2    0.260265   -0.163098    0.533727    11.00000   -1.20000 
AFIX   0 
C8A   1    0.299537   -0.133617    0.619292    11.00000    0.04574    0.02036 = 
         0.05369   -0.00520    0.01495   -0.00439 
C8B   1    0.850422    1.691719    0.485066    11.00000    0.04778    0.02106 = 
         0.04657    0.00111    0.00435   -0.00593 
AFIX  43 
H8BA  2    0.894669    1.818733    0.476482    11.00000   -1.20000 
AFIX   0 
C9B   1    0.789187    1.544167    0.440088    11.00000    0.03303    0.01702 = 
         0.04657    0.00241    0.00584    0.00310 
C9A   1    0.362811    0.001507    0.662853    11.00000    0.03521    0.01846 = 
         0.03900    0.00100    0.00915    0.00629 
C10B  1    0.793033    1.583970    0.382078    11.00000    0.03673    0.02500 = 
         0.05019    0.00815    0.01023    0.00853 
C10A  1    0.365055   -0.047030    0.721212    11.00000    0.05904    0.04676 = 
         0.04218    0.00194    0.01279   -0.01196 
AFIX  43 
H10A  2    0.323530   -0.176498    0.731805    11.00000   -1.20000 
AFIX   0 
C11A  1    0.427526    0.092948    0.763431    11.00000    0.06780    0.04204 = 
         0.03983    0.00418    0.01076   -0.00951 
AFIX  43 
H11A  2    0.426029    0.061697    0.801726    11.00000   -1.20000 
AFIX   0 
C11B  1    0.732066    1.430866    0.340603    11.00000    0.05159    0.04135 = 
         0.04517    0.00837    0.01427   -0.01184 
AFIX  43 
H11B  2    0.733182    1.458207    0.302133    11.00000   -1.20000 
AFIX   0 
C12B  1    0.669413    1.236690    0.356876    11.00000    0.05142    0.03605 = 
         0.03912    0.00095    0.00701   -0.00454 
AFIX  43 
H12A  2    0.628915    1.136693    0.329077    11.00000   -1.20000 
AFIX   0 
C12A  1    0.492141    0.279572    0.748136    11.00000    0.05284    0.04887 = 
         0.03563   -0.00497    0.00277   -0.01204 
AFIX  43 
H12B  2    0.535567    0.366100    0.776873    11.00000   -1.20000 
AFIX   0 
C13B  1    0.907544    2.071369    0.245085    11.00000    0.09029    0.07592 = 
         0.07291    0.02462    0.05286    0.00856 
C13A  1    0.068714   -0.761697    0.566420    11.00000    0.06048    0.05589 = 
         0.13283   -0.01757    0.00039   -0.02099 
O3A   4    0.015937   -0.952923    0.571966    11.00000    0.12194    0.10078 = 
         0.17248   -0.00443    0.00469   -0.06313 
C14B  1    0.833703    1.950783    0.206962    11.00000    0.14264    0.14068 = 
         0.08255    0.03147    0.03543   -0.04275 
AFIX 137 
H14D  2    0.794438    1.842460    0.227357    11.00000   -1.50000 
H14E  2    0.861838    1.839658    0.181284    11.00000   -1.50000 
H14F  2    0.793271    2.086030    0.185625    11.00000   -1.50000 
AFIX   0 
C15A  1    0.113987   -0.676206    0.668817    11.00000    0.08786    0.07668 = 
         0.11007   -0.00647    0.03128   -0.04186 
AFIX 137 
H15A  2    0.178082   -0.702828    0.691523    11.00000   -1.50000 
H15B  2    0.074343   -0.832150    0.671327    11.00000   -1.50000 
H15C  2    0.083764   -0.522586    0.682660    11.00000   -1.50000 
AFIX   0 
C15B  1    0.991124    2.139490    0.349192    11.00000    0.09927    0.11744 = 
         0.08719    0.01043    0.02706   -0.02380 
AFIX 137 
H15D  2    1.025509    2.276223    0.332423    11.00000   -1.50000 
H15E  2    1.036886    2.005390    0.366449    11.00000   -1.50000 
H15F  2    0.959367    2.218116    0.377758    11.00000   -1.50000 
AFIX   0 
C3S   1    0.374150    0.380275    0.378975    11.00000    0.10865    0.08718 = 
         0.12976   -0.04813    0.00999   -0.01762 
AFIX 137 
H3SA  2    0.353041    0.206949    0.363936    11.00000   -1.50000 
H3SB  2    0.404720    0.362981    0.418369    11.00000   -1.50000 
H3SC  2    0.420417    0.453741    0.357727    11.00000   -1.50000 
AFIX   0 
N1S   3    0.287000    0.563486    0.374112    11.00000    0.09761    0.07211 = 
         0.10318   -0.02941    0.02804   -0.02698 
O1S   4    0.216509    0.855476    0.417814    11.00000    0.16181    0.15276 = 
         0.16130   -0.02883    0.02124    0.04161 
C2S   1    0.285267    0.685389    0.419047    11.00000    0.15029    0.14286 = 
         0.10722   -0.04287    0.01093    0.03629 
C1S   1    0.221232    0.547648    0.324034    11.00000    0.13829    0.21978 = 
         0.13508   -0.04589   -0.01485   -0.00013 
AFIX 137 
H1SA  2    0.255905    0.538990    0.292739    11.00000   -1.50000 
H1SB  2    0.179734    0.703344    0.319922    11.00000   -1.50000 
H1SC  2    0.181754    0.389460    0.324185    11.00000   -1.50000 
  
AFIX   0 
HKLF 4 
  
REM  s1_a.res in Pc 
REM R1 =  0.1434 for    2613 Fo > 4sig(Fo)  and  0.2820 for all    6617 data 
REM    448 parameters refined using    380 restraints 
  
END 
  
WGHT      0.1580      0.7574 
  
REM Highest difference peak  0.496,  deepest hole -0.345,  1-sigma level  0.089 
Q1    1   0.9568  2.0094  0.5111  11.00000  0.05    0.50 
Q2    1   0.9173  1.8862  0.4717  11.00000  0.05    0.49 
Q3    1   0.3142  0.3123  0.2862  11.00000  0.05    0.48 
Q4    1   0.3044 -0.2674  0.7300  11.00000  0.05    0.44 
Q5    1   0.0188 -0.8225  0.5005  11.00000  0.05    0.40 
Q6    1   0.1789  0.6164  0.2519  11.00000  0.05    0.39 
Q7    1   0.7338  1.1612  0.5097  11.00000  0.05    0.37 
Q8    1   0.2015  0.7277  0.3732  11.00000  0.05    0.36 
Q9    1   0.8851  2.2825  0.1827  11.00000  0.05    0.33 
Q10   1   0.7832  1.7419  0.2178  11.00000  0.05    0.33 
Q11   1   0.1400 -0.4947  0.5104  11.00000  0.05    0.32 
Q12   1   0.9044  2.3318  0.1750  11.00000  0.05    0.31 
Q13   1   0.7768  1.7000  0.4409  11.00000  0.05    0.31 
Q14   1   0.4196  0.0542  0.7490  11.00000  0.05    0.31 
Q15   1   0.6412  1.1857  0.4212  11.00000  0.05    0.31 
Q16   1   0.7628  1.2930  0.5258  11.00000  0.05    0.30 
Q17   1   0.7466  1.3304  0.5072  11.00000  0.05    0.29 
Q18   1   0.5057  0.2940  0.6812  11.00000  0.05    0.29 
Q19   1   0.6246  0.7751  0.7098  11.00000  0.05    0.28 
Q20   1   0.6511  0.8473  0.7593  11.00000  0.05    0.28 
; 
_shelx_res_checksum   75244 
  
_shelx_hkl_file 
; 
   2   0   0  146.29   30.60 
   2   0   0  131.79   30.30 
  -2   0   0  133.49   30.30 
  -2   0   0  151.18   30.40 
   3   0   0  142.69   32.50 
  -3   0   0  140.69   32.20 
   3   0   0  146.49   32.20 
  -3   0   0  160.88   32.30 
   4   0   0  212.18   46.40 
   4   0   0  219.28   46.10 
   4   0   0  203.78   45.60 
  -4   0   0  222.28   46.10 
  -4   0   0  209.38   46.00 
   5   0   0   91.49   20.10 
   5   0   0   80.69   20.60 
  -5   0   0   85.89   19.80 
  -5   0   0   85.69   20.10 
   5   0   0   87.49   19.20 
  -6   0   0   60.19   14.20 
   6   0   0   74.59   15.10 
   6   0   0   42.70   12.30 
   6   0   0   66.49   14.90 
   7   0   0   20.30    9.70 
   7   0   0   24.50    9.80 
  -7   0   0   16.70    8.60 
   7   0   0   34.20    8.70 
  -7   0   0   27.30    9.70 
   8   0   0   23.30    7.60 
  -8   0   0   22.00    8.30 
   8   0   0   11.80    8.10 
  -8   0   0   18.30    8.80 
   8   0   0   14.10    8.70 
   9   0   0   27.60    9.20 
  -9   0   0   23.60    9.70 
   9   0   0   24.00   10.20 
  -9   0   0   29.50    9.80 
   9   0   0   22.70    9.60 
  10   0   0    6.70    7.90 
 -10   0   0    3.70    6.10 
  10   0   0   -0.60    5.80 
  10   0   0    3.10   10.50 
 -10   0   0    1.00    6.40 
  11   0   0   37.00   10.00 
 -11   0   0   28.80   11.20 
  11   0   0    7.20    9.70 
  12   0   0    6.50   10.40 
  12   0   0   -3.80    7.30 
  12   0   0   -3.00    8.30 
 -12   0   0   -7.00    5.70 
 -12   0   0    5.20    8.40 
  13   0   0    2.40   11.00 
  13   0   0   19.00    8.40 
 -13   0   0    8.20   10.20 
  13   0   0   31.70   14.30 
  14   0   0   63.79   16.20 
  14   0   0   83.99   25.10 
 -14   0   0   70.79   19.90 
  15   0   0    1.70    8.10 
 -15   0   0    2.70   13.00 
  15   0   0    8.60   16.00 
 -15   0   0    4.30   14.40 
  15   0   0   -9.60   17.90 
 -16   0   0   43.90   18.90 
  16   0   0   62.19   15.30 
  16   0   0   14.80   20.10 
 -16   0   0   82.39   20.60 
  16   0   0   91.99   27.20 
  17   0   0   79.79   28.40 
   0  -1   0    3.90    5.00 
   0  -1   0    3.10    3.90 
   0   1   0    3.90    3.50 
  -1  -1   0   26.70    7.80 
  -1  -1   0   21.50    6.60 
   1  -1   0   30.80    7.30 
  -1  -1   0   39.00    8.30 
   1  -1   0   38.40    9.30 
  -1   1   0   31.80    7.20 
   1   1   0   24.70    7.20 
   2  -1   0  612.04  137.09 
  -2  -1   0  631.04  136.99 
  -2  -1   0  641.84  136.89 
  -2  -1   0  606.94  136.99 
   2  -1   0  641.84  136.99 
   2  -1   0  693.23  136.99 
  -2  -1   0  629.24  136.79 
  -2   1   0  678.83  136.99 
  -2   1   0  633.94  136.79 
   2   1   0  663.03  137.09 
  -3  -1   0 2805.62  643.44 
  -3  -1   0 3041.60  643.54 
  -3  -1   0 3045.40  643.54 
   3  -1   0 3003.20  643.64 
   3  -1   0 3167.38  643.64 
   3  -1   0 2763.32  643.54 
   3   1   0 3091.49  643.64 
   3   1   0 3081.39  643.64 
  -3   1   0 3236.78  643.64 
  -3   1   0 3037.30  643.54 
   4  -1   0 1364.46  311.97 
  -4  -1   0 1376.06  311.77 
  -4  -1   0 1434.26  311.97 
  -4  -1   0 1476.75  312.07 
   4  -1   0 1504.55  312.07 
   4  -1   0 1490.85  312.07 
  -4   1   0 1554.24  312.07 
  -4   1   0 1502.25  311.97 
   4   1   0 1484.55  312.07 
   4   1   0 1475.45  312.07 
  -5  -1   0  255.17   57.79 
   5  -1   0  269.57   58.09 
   5  -1   0  276.97   58.39 
  -5  -1   0  268.47   58.09 
   5  -1   0  265.87   58.09 
  -5  -1   0  258.37   57.99 
  -5   1   0  263.77   57.99 
  -5   1   0  282.77   58.09 
   5   1   0  287.37   58.39 
   5   1   0  267.17   58.19 
  -6  -1   0   38.20    9.80 
   6  -1   0   30.40   10.00 
   6  -1   0   19.80    9.90 
   6  -1   0   40.70   11.50 
  -6  -1   0   45.00    9.60 
  -6  -1   0   28.90    9.70 
   6   1   0   24.80    9.20 
   6   1   0   29.00   10.10 
  -6   1   0   43.20   11.10 
  -7  -1   0    2.40    5.50 
   7  -1   0   11.00    7.40 
   7  -1   0   -1.80    4.60 
   7  -1   0    7.70    7.90 
  -7  -1   0    1.80    3.80 
  -7  -1   0   13.50    5.90 
  -7   1   0   18.30    7.00 
   7   1   0   12.90    6.30 
  -7   1   0    2.80    3.80 
   7   1   0    9.60    7.20 
  -8  -1   0   29.90    8.60 
  -8  -1   0   20.90    7.80 
   8  -1   0   33.30   11.30 
   8  -1   0   34.50   10.40 
   8  -1   0   16.00    8.40 
  -8  -1   0   13.70    7.50 
   8   1   0   18.30    9.40 
   8   1   0   20.90    9.80 
  -8   1   0   33.70    8.90 
   9  -1   0   12.20    8.10 
  -9  -1   0   12.10    6.80 
   9  -1   0    8.50    7.10 
  -9  -1   0   19.00    8.40 
  -9  -1   0   14.80    8.00 
   9  -1   0   15.50    8.80 
  -9   1   0    1.70    5.40 
  -9   1   0   17.50    7.30 
   9   1   0   17.60    9.70 
   9   1   0    5.40    6.70 
  10  -1   0    7.90    7.70 
 -10  -1   0   22.40    7.60 
  10  -1   0    5.50    9.80 
 -10  -1   0    9.70    7.50 
  10  -1   0    4.40    8.40 
 -10  -1   0   12.50    7.20 
  10   1   0   -1.50    7.40 
 -10   1   0   12.10    7.40 
  11  -1   0   17.30   10.60 
  11  -1   0    9.20    9.90 
 -11  -1   0    5.70    8.60 
 -11  -1   0    5.80    7.60 
  11  -1   0  -12.60    7.60 
 -11  -1   0  -10.80    8.50 
  11   1   0   13.80   10.20 
 -11   1   0    6.50    6.50 
 -11   1   0  -14.40    8.60 
  11   1   0    3.60    8.70 
 -12  -1   0   41.20   11.90 
  12  -1   0   13.50   11.50 
 -12  -1   0   21.40   11.00 
  12  -1   0   38.20   13.30 
 -12  -1   0   33.20   11.60 
  12   1   0   11.80   11.10 
 -12   1   0    6.40    9.10 
  12   1   0   22.10   13.10 
 -12   1   0   45.90   12.80 
 -13  -1   0  106.69   26.50 
  13  -1   0   87.49   28.50 
  13  -1   0  106.09   25.30 
  13  -1   0   94.19   27.40 
 -13  -1   0  122.39   25.30 
  13   1   0  104.49   27.80 
 -13   1   0  144.39   27.40 
  13   1   0   90.79   29.20 
 -13   1   0   68.89   25.10 
 -14  -1   0   65.79   14.50 
  14  -1   0   16.30   16.40 
 -14  -1   0   37.10   19.20 
  14  -1   0   -7.70   18.00 
 -14  -1   0    5.40   13.10 
  14  -1   0   25.90   13.80 
 -14   1   0   29.10   12.70 
  14   1   0   15.60   16.50 
 -14   1   0   27.50   13.90 
  14   1   0   58.39   19.40 
  15  -1   0   14.50   17.10 
  15  -1   0  -16.50   20.70 
 -15  -1   0   26.60   12.70 
 -15  -1   0   -0.80   13.20 
 -15  -1   0   -5.00   15.00 
  15  -1   0    1.90   15.80 
  15   1   0    3.80   21.30 
 -15   1   0   25.80   13.20 
 -15   1   0   15.50   16.30 
  15   1   0   -5.20   15.70 
  16  -1   0   42.00   18.50 
  16  -1   0   29.10   21.20 
  16  -1   0   13.50   25.70 
 -16  -1   0   39.10   18.50 
 -16  -1   0    7.30   12.80 
 -16  -1   0  -17.40   15.70 
 -16   1   0   10.40   14.90 
  16   1   0   18.90   20.50 
  16   1   0   62.79   28.10 
   0  -2   0   63.89   16.80 
   0  -2   0   80.99   17.10 
  -1  -2   0  165.48   35.30 
   1  -2   0  157.78   35.50 
   1  -2   0  166.18   35.10 
  -1  -2   0  159.58   35.40 
   2  -2   0    1.20    7.80 
   2  -2   0   16.20    5.00 
  -2  -2   0    1.00    5.60 
  -2  -2   0   14.80    6.60 
   2   2   0   10.10    5.30 
   3  -2   0   46.60   12.00 
   3  -2   0   45.40   11.60 
  -3  -2   0   40.50   11.50 
   3  -2   0   47.10   11.40 
  -3  -2   0   49.20   12.50 
  -3   2   0   53.49   11.70 
   3   2   0   54.29   12.30 
  -4  -2   0   56.59   14.70 
  -4  -2   0   72.39   14.10 
  -4  -2   0   60.29   13.50 
   4  -2   0   48.40   13.90 
   4  -2   0   57.59   15.60 
   4  -2   0   62.39   14.70 
   4   2   0   61.39   15.00 
  -4   2   0   71.29   14.30 
  -4   2   0   51.39   13.50 
   4   2   0   59.89   14.20 
   5  -2   0  231.08   44.00 
  -5  -2   0  167.18   43.40 
  -5  -2   0  214.68   43.60 
  -5  -2   0  199.78   43.80 
   5  -2   0  158.88   43.50 
   5  -2   0  222.18   44.40 
   5   2   0  194.58   43.80 
  -5   2   0  206.58   43.60 
   5   2   0  212.98   44.20 
  -5   2   0  213.98   43.70 
   6  -2   0   36.20   13.40 
  -6  -2   0   35.10    9.90 
  -6  -2   0   34.40    9.20 
   6  -2   0   22.90   10.40 
  -6   2   0   41.10    9.80 
   6   2   0   17.90    9.40 
  -6   2   0   28.90    9.40 
   6   2   0   36.90   10.70 
  -7  -2   0  189.78   36.80 
  -7  -2   0  127.89   36.50 
  -7  -2   0  186.28   36.80 
   7  -2   0  124.99   36.70 
   7  -2   0  165.88   37.40 
   7  -2   0  180.98   37.30 
   7   2   0  155.68   37.10 
  -7   2   0  196.28   37.00 
   7   2   0  188.18   37.50 
   8  -2   0   85.79   20.20 
  -8  -2   0   84.69   17.40 
   8  -2   0   43.40   17.60 
   8  -2   0   60.09   17.70 
  -8  -2   0   63.79   16.90 
  -8   2   0   61.19   16.90 
   8   2   0   91.99   19.70 
   9  -2   0   64.39   21.30 
   9  -2   0   94.79   22.20 
  -9  -2   0  112.09   20.80 
  -9  -2   0   82.19   20.60 
   9  -2   0   94.59   21.80 
  -9  -2   0   54.09   20.00 
   9   2   0  119.69   23.20 
   9   2   0   74.89   21.50 
  -9   2   0   84.59   21.10 
  10  -2   0   54.89   18.30 
 -10  -2   0   46.80   13.70 
  10  -2   0   31.80   14.30 
 -10  -2   0   58.59   13.90 
 -10   2   0   33.50   13.70 
  10   2   0   49.60   15.90 
  10   2   0   47.00   16.20 
 -11  -2   0   20.10   22.60 
  11  -2   0   26.50   14.50 
  11  -2   0   15.70   11.20 
 -11  -2   0    9.80    8.10 
 -11  -2   0   -3.40    9.40 
  11  -2   0   -2.30   12.80 
 -11   2   0    1.10    7.30 
  11   2   0   19.90   13.50 
  12  -2   0   13.40   13.80 
  12  -2   0   -5.90   12.20 
  12  -2   0   24.20   11.70 
 -12  -2   0    7.70    8.10 
 -12  -2   0  -11.80    9.40 
 -12   2   0    9.20    8.60 
  12   2   0   -0.10   13.20 
 -13  -2   0   13.70   14.40 
 -13  -2   0  -13.40    9.70 
 -13  -2   0   -3.20    9.70 
  13  -2   0   24.60   15.70 
  13  -2   0   14.80   11.50 
  13  -2   0    6.10   23.10 
 -13   2   0    1.30    8.70 
 -14  -2   0   10.20   11.80 
  14  -2   0   17.70   17.00 
 -14  -2   0   -0.40   13.60 
  14  -2   0   -8.40   13.90 
 -14  -2   0   13.50   17.00 
  14  -2   0    1.70   21.40 
  14   2   0  -15.90   16.20 
  14   2   0  -34.60   18.90 
 -14   2   0   -3.30   13.80 
 -14   2   0    2.10   10.00 
 -15  -2   0   30.60   19.40 
 -15  -2   0   -9.30   13.80 
  15  -2   0    0.30   15.90 
  15  -2   0   -6.70   22.90 
 -15  -2   0    9.30   13.40 
  15   2   0   -6.40   23.40 
 -15   2   0   25.50   20.30 
  15   2   0   18.70   20.10 
 -15   2   0   17.10   12.80 
  16  -2   0   -0.40   28.30 
 -16  -2   0  -16.10   18.60 
  16   2   0   16.20   20.80 
 -16   2   0    5.90   16.40 
   0  -3   0   29.60    9.50 
  -1  -3   0   40.80   11.70 
   1  -3   0   26.40   11.20 
  -1  -3   0   29.30    9.60 
   1  -3   0   22.30    8.30 
  -2  -3   0   23.20    9.60 
  -2  -3   0   45.00   11.80 
   2  -3   0   28.10    8.90 
   2  -3   0   33.60   12.70 
  -3  -3   0   51.29   14.10 
   3  -3   0   77.59   17.80 
   3  -3   0   46.40   12.80 
  -4  -3   0   86.79   20.60 
  -4  -3   0   85.59   19.80 
   4  -3   0   84.29   21.90 
   4  -3   0   86.29   19.70 
  -4  -3   0   82.79   19.30 
  -4   3   0   92.19   19.50 
   4   3   0   93.79   20.50 
  -5  -3   0    4.30    7.60 
  -5  -3   0    8.00    5.60 
  -5  -3   0   -2.20    4.00 
   5  -3   0    2.00   10.60 
   5  -3   0   -7.60    5.20 
  -5  -3   0   -0.70    4.20 
   5  -3   0   -6.10    4.20 
   5  -3   0   -0.70    6.00 
   5   3   0    3.30    7.10 
   5   3   0    9.80    6.00 
  -5   3   0    0.20    2.90 
  -5   3   0   14.30    5.00 
  -6  -3   0   24.70    6.10 
  -6  -3   0   11.60    6.50 
  -6  -3   0   17.50    8.90 
   6  -3   0   40.90   17.30 
   6  -3   0   13.80    8.70 
   6  -3   0   10.40    7.60 
  -6  -3   0   19.30    7.40 
   6   3   0   13.50    7.90 
   6   3   0   20.30    9.60 
  -6   3   0   17.60    6.60 
  -6   3   0   19.30    6.80 
   7  -3   0   12.30   12.70 
  -7  -3   0    5.70    5.30 
   7  -3   0    1.60    7.00 
  -7  -3   0    8.60    6.60 
  -7  -3   0    8.30    8.40 
   7  -3   0   10.50    8.30 
  -7   3   0   -0.50    6.40 
  -7   3   0    5.50    5.90 
   7   3   0    0.60    7.70 
   7   3   0    2.80    8.50 
  -8  -3   0   97.49   21.40 
   8  -3   0  119.89   23.40 
  -8  -3   0   94.19   22.20 
  -8  -3   0   72.49   21.40 
   8  -3   0   61.79   22.00 
   8  -3   0  124.99   24.70 
   8   3   0  102.39   23.20 
  -8   3   0  101.09   21.60 
  -8   3   0   58.69   21.00 
  -9  -3   0  109.49   22.70 
  -9  -3   0   70.99   21.20 
   9  -3   0   54.79   21.80 
   9  -3   0  101.59   23.40 
  -9  -3   0   91.79   21.70 
  -9   3   0   81.49   21.20 
  -9   3   0   97.29   21.80 
   9   3   0  105.29   24.40 
   9   3   0   93.29   23.40 
  10  -3   0   16.50   12.50 
  10  -3   0   53.09   18.10 
 -10  -3   0   34.20    9.80 
  10  -3   0    3.50   10.60 
 -10  -3   0   41.70   12.70 
 -10  -3   0    5.50    8.40 
 -10   3   0    9.90    8.40 
 -10   3   0   19.00    9.90 
  10   3   0   19.30   12.20 
  10   3   0   12.80   13.90 
  11  -3   0    0.10   12.90 
 -11  -3   0    0.40    9.30 
 -11  -3   0   37.60   14.40 
 -11  -3   0    2.30    8.40 
  11  -3   0   -2.60   10.50 
 -11   3   0    8.80    9.70 
  11   3   0    9.10   14.10 
  12  -3   0   13.30   16.90 
 -12  -3   0   11.90    9.50 
 -12  -3   0    4.50   10.60 
  12  -3   0    7.50   12.30 
  12   3   0   17.10   15.70 
 -12   3   0    1.80   12.00 
  12   3   0  -11.50   15.70 
 -12   3   0   -0.40   10.30 
  13  -3   0   41.50   21.60 
 -13  -3   0   -6.40   10.70 
  13  -3   0   16.00   19.10 
 -13  -3   0   29.90   17.90 
 -13  -3   0  -11.30   13.10 
  13  -3   0   26.00   15.10 
 -13   3   0   14.60   10.10 
  13   3   0  -41.00   18.30 
 -13   3   0   -8.10   14.90 
  13   3   0   26.60   17.40 
 -14  -3   0   17.60   12.30 
 -14  -3   0   11.50   15.40 
  14  -3   0  -24.60   16.20 
 -14  -3   0   66.49   21.80 
  14  -3   0   13.70   33.60 
  14   3   0   46.40   19.70 
 -14   3   0   21.60   16.90 
   0  -4   0   -0.90    8.20 
   0  -4   0   46.10   12.90 
  -1  -4   0   23.30   12.10 
   1  -4   0    4.20    7.70 
   1  -4   0   21.30   13.90 
  -2  -4   0   18.10   10.10 
   2  -4   0   16.30    8.90 
   2  -4   0   17.10   13.70 
  -2  -4   0   34.90   12.00 
   3  -4   0  -16.90   13.80 
  -3  -4   0   -5.10    8.40 
  -3  -4   0   -1.40    9.10 
   3  -4   0    0.40    6.90 
   4  -4   0   12.50   15.00 
  -4  -4   0   -7.10    9.00 
   4  -4   0   15.00    7.50 
  -4  -4   0    9.00    9.40 
   5  -4   0   10.60    7.10 
   5  -4   0    3.80   15.50 
  -5  -4   0    8.50    8.50 
   5   4   0   19.90    8.60 
   5   4   0   11.50   10.00 
  -6  -4   0   13.70    7.00 
   6  -4   0   -9.50    5.70 
   6   4   0  -15.90    9.40 
  -6   4   0    8.70    6.30 
   6   4   0  -18.60    7.70 
  -7  -4   0   21.30    7.10 
  -7  -4   0   19.60    6.50 
   7  -4   0   21.90    9.80 
   7  -4   0  -14.10    9.40 
  -7   4   0   23.70    7.40 
  -7   4   0   -2.00    5.80 
   7   4   0    8.50   11.30 
   7   4   0   -3.70    9.00 
   8  -4   0    7.80    9.80 
  -8  -4   0    9.50    6.70 
  -8  -4   0    8.40    7.30 
   8  -4   0   18.90   11.20 
   8   4   0  -26.50   12.40 
  -8   4   0   11.20    6.70 
   8   4   0  -13.00   11.00 
  -8   4   0   -2.20    7.90 
  -9  -4   0    7.40    7.80 
   9  -4   0    6.30   13.50 
  -9  -4   0   30.50   12.10 
   9  -4   0   57.99   20.40 
  -9  -4   0   13.90    8.80 
   9  -4   0   -1.00   11.40 
  -9   4   0   15.40    9.50 
   9   4   0    1.00   12.90 
  -9   4   0    6.10    8.00 
 -10  -4   0   36.60   15.30 
 -10  -4   0   13.40    9.50 
  10  -4   0   25.90   15.00 
 -10  -4   0    8.70    8.90 
  10  -4   0    1.00   12.40 
 -10   4   0    5.30    8.70 
  10   4   0  -10.40   14.60 
 -10   4   0    8.00   12.90 
  10   4   0    5.10   16.90 
 -11  -4   0   17.70   11.10 
 -11  -4   0   23.40   12.50 
  11  -4   0   22.10   18.40 
  11  -4   0   10.60   14.50 
 -11  -4   0   41.60   17.00 
 -11   4   0   13.00   10.70 
  11   4   0   -2.60   16.70 
  11   4   0   46.00   21.50 
 -11   4   0   30.10   13.50 
 -12  -4   0   25.80   13.80 
  12  -4   0  -22.80   20.40 
  12  -4   0    6.50   16.90 
 -12  -4   0    6.40   11.60 
 -12  -4   0   80.59   21.50 
 -12   4   0   17.40   14.60 
 -12   4   0   19.50   11.70 
  12   4   0    0.90   18.60 
  12   4   0   26.30   24.20 
 -13  -4   0   17.80   18.20 
 -13  -4   0   12.40   13.60 
  13  -4   0  -15.60   18.80 
  13   4   0  -14.10   21.30 
 -13   4   0   -6.10   13.90 
   0  -5   0   39.20   15.20 
   0  -5   0    9.30   11.70 
  -1  -5   0   20.80   12.40 
  -1  -5   0   43.80   15.60 
   1  -5   0   18.30   16.50 
   2  -5   0   -5.00   16.60 
   2  -5   0   -0.40   10.00 
  -2  -5   0   21.40   12.10 
  -2  -5   0   28.70   14.10 
  -3  -5   0   -6.60   12.30 
  -3  -5   0   -9.10   12.00 
   3  -5   0   35.90   19.30 
   3  -5   0    5.10    9.60 
   4  -5   0   75.49   23.20 
  -4  -5   0   44.50   17.80 
   4  -5   0   29.00   13.20 
  -4  -5   0   40.80   16.90 
   5  -5   0  -14.10   12.50 
  -5  -5   0   21.30   11.40 
   5  -5   0   72.59   23.30 
  -5  -5   0   21.10   14.30 
   6  -5   0   78.59   24.40 
  -6  -5   0    6.10    9.80 
  -6  -5   0   24.50   15.00 
  -7  -5   0  -11.60   15.10 
   7  -5   0   61.29   27.50 
  -8  -5   0    7.30   18.90 
   8  -5   0   84.39   31.10 
   9   5   0   21.30   21.00 
   9   5   0   14.20   19.00 
  -9   5   0  -15.90   13.60 
 -10  -5   0   10.10    9.80 
  10  -5   0    7.20   18.30 
 -10   5   0   12.90   12.70 
  10   5   0  -32.50   25.40 
   0  -6   0   -3.60   18.80 
   0  -6   0   69.89   23.30 
  -1  -6   0   10.20   20.70 
  -1  -6   0   15.10   16.60 
   1  -6   0  -11.10   15.50 
   2  -6   0   70.19   25.40 
   2  -6   0    0.10   17.30 
  -2  -6   0   22.50   18.10 
  -2  -6   0   64.59   21.30 
   3  -6   0    6.30   17.70 
  -3  -6   0   67.99   21.10 
  -4  -6   0   47.30   17.90 
   4  -6   0  -13.00   16.40 
 -17   0   1   10.30   14.80 
  17   0  -1   15.50   20.60 
 -16   0   1   11.30   15.50 
  16   0  -1   27.20   21.30 
 -16   0   1   17.10   12.90 
  16   0  -1  -17.40   18.60 
 -15   0   1   -2.80   11.30 
  15   0  -1    1.60    7.50 
  15   0  -1  -18.60   17.20 
 -15   0   1   26.30   14.30 
  15   0  -1    6.50   13.80 
 -14   0   1  -11.20   10.20 
 -14   0   1   -1.30    8.50 
  14   0  -1   -9.40   14.60 
  14   0  -1   12.30    7.30 
  13   0  -1  -24.90   11.90 
  13   0  -1   11.00   10.10 
  13   0  -1    6.80    7.10 
 -13   0   1    3.50    9.30 
 -12   0   1    2.70    6.70 
 -12   0   1   -4.00    8.00 
  12   0  -1    4.80    6.60 
  12   0  -1    0.40   12.10 
  12   0  -1   -5.60    9.20 
  11   0  -1   -3.50    6.40 
 -11   0   1   -1.00    6.70 
  11   0  -1    2.10    9.50 
  11   0  -1   -6.60    8.80 
 -10   0   1    3.40    6.60 
  10   0  -1   -5.10    6.40 
  10   0  -1   -2.80    8.50 
 -10   0   1   -4.80    5.40 
  10   0  -1   -5.10    5.70 
  -9   0   1    0.30    4.70 
   9   0  -1    7.90    6.40 
  -9   0   1    2.10    5.00 
   9   0  -1    3.80    6.20 
   9   0  -1    2.90    5.30 
   8   0  -1   -4.60    6.20 
   8   0  -1   -1.60    4.40 
   8   0  -1   -4.10    5.30 
  -8   0   1    0.70    4.50 
  -8   0   1    1.00    6.10 
   7   0  -1   -7.70    5.60 
  -7   0   1   -1.90    5.40 
   7   0  -1   -0.40    6.00 
   7   0  -1    1.70    4.20 
  -7   0   1    0.80    4.80 
  -6   0   1    5.00    4.70 
   6   0  -1    7.10    4.80 
  -6   0   1    6.60    6.10 
   6   0  -1   -1.70    4.10 
  -6   0   1    2.30    3.60 
   6   0  -1   -2.10    7.50 
   5   0  -1   -2.60    6.20 
  -5   0   1    0.00    3.50 
   5   0  -1    4.60    4.50 
  -5   0   1    5.80    5.80 
   5   0  -1   -0.90    4.80 
  -5   0   1    1.60    4.90 
   4   0  -1    9.70    6.90 
  -4   0   1    3.10    6.00 
   4   0  -1   11.70    6.30 
   4   0  -1   10.70    5.10 
  -4   0   1    9.30    5.00 
  -3   0   1   -2.50    3.60 
   3   0  -1    2.40    3.50 
  -3   0   1   -2.70    4.30 
   3   0  -1   -0.10    5.00 
  -3   0   1    2.90    4.80 
   3   0  -1    1.30    4.60 
  -2   0   1    0.90    2.10 
   2   0  -1   -1.10    2.20 
   2   0  -1   -1.60    1.60 
  -2   0   1   -2.10    3.20 
   2   0  -1   -6.40    4.20 
   2   0  -1   -0.80    2.80 
  -2   0   1    0.70    2.50 
  -2   0   1   -1.60    2.00 
  -2   0  -1    4.30    3.00 
  -2   0  -1    6.20    4.40 
   2   0   1    3.40    3.70 
   2   0   1    9.90    4.00 
  -3   0  -1    3.00    5.40 
   3   0   1    4.60    4.80 
  -3   0  -1    2.10    4.00 
   3   0   1   -0.90    5.50 
   4   0   1    0.10    4.80 
  -4   0  -1   -4.30    3.60 
  -4   0  -1    4.00    6.20 
   4   0   1   -4.00    6.00 
   5   0   1   -3.90    5.40 
  -5   0  -1    0.10    4.40 
   5   0   1   -0.90    6.60 
  -5   0  -1   -0.50    6.00 
  -6   0  -1    4.30    4.90 
   6   0   1   -2.40    7.20 
   6   0   1   -0.80    5.30 
  -6   0  -1    2.00    7.10 
   7   0   1    2.90    4.80 
  -7   0  -1   -1.30    3.50 
   7   0   1   13.30    6.90 
   7   0   1   -1.60    6.00 
  -7   0  -1    3.30    5.80 
   8   0   1    0.40    6.50 
  -8   0  -1    0.90    3.90 
   8   0   1    2.90    5.90 
   8   0   1   -2.90    4.60 
  -8   0  -1    6.60    6.30 
   9   0   1    5.50    6.40 
   9   0   1    2.30    6.70 
  -9   0  -1    0.70    3.90 
  -9   0  -1  -14.30    5.90 
   9   0   1    2.50    7.00 
  10   0   1    1.20    7.70 
  10   0   1    9.40    6.90 
  10   0   1   -2.20    7.50 
 -10   0  -1    2.40    7.20 
 -10   0  -1   -1.50    5.50 
 -11   0  -1   -3.50    4.80 
  11   0   1    6.80    8.00 
  11   0   1    0.40    7.40 
 -11   0  -1    0.50    8.40 
  11   0   1   16.70   17.50 
  12   0   1    4.80    9.70 
 -12   0  -1    2.80    7.90 
  12   0   1  -16.30    9.80 
 -12   0  -1   -1.30    8.10 
  12   0   1    8.20    7.90 
  13   0   1    7.50    8.20 
  13   0   1   -6.10   11.80 
  13   0   1   13.20   13.80 
 -13   0  -1    5.40   10.50 
  14   0   1   -4.80   15.70 
 -14   0  -1  -10.40   11.10 
 -14   0  -1   11.00    9.00 
  14   0   1    6.40   23.50 
 -15   0  -1   14.30   14.30 
 -15   0  -1   26.80   10.40 
  15   0   1    7.60    9.20 
  15   0   1  -11.30   18.20 
  15   0   1   16.10   14.30 
 -16   0  -1    5.10   12.20 
  16   0   1   10.00   10.00 
  16   0   1   23.90   17.70 
  16   0   1   15.30   26.30 
 -16   0  -1   37.40   17.70 
  16  -1  -1   -2.00   17.10 
 -16  -1   1   19.40   15.00 
  16  -1  -1  -42.00   25.50 
 -16  -1   1   22.30   15.20 
  16  -1  -1  -12.20   16.10 
 -16   1   1  -13.20   19.50 
 -16   1   1    7.80   11.50 
  16   1  -1  -14.00   23.90 
  16   1  -1    8.10   18.80 
 -15  -1   1    5.40   10.80 
  15  -1  -1    8.40   13.40 
 -15  -1   1   13.80   14.50 
  15  -1  -1   28.80   18.20 
  15  -1  -1   -3.00   21.50 
 -15  -1   1  -17.70   12.90 
  15   1  -1   13.70   21.10 
 -15   1   1   25.10   16.60 
  15   1  -1   -8.80   16.00 
 -15   1   1   14.40   12.10 
 -14  -1   1   10.60   15.30 
 -14  -1   1   -5.30   12.70 
  14  -1  -1    5.80   17.10 
 -14  -1   1    7.20   12.20 
  14  -1  -1   27.50   11.50 
  14  -1  -1    5.70   15.90 
  14   1  -1   23.80   14.50 
 -14   1   1    6.50   10.20 
  14   1  -1    2.80   17.30 
 -14   1   1   -1.10   13.50 
  13  -1  -1   13.20   12.50 
  13  -1  -1   11.10   11.30 
 -13  -1   1   18.70   11.60 
  13  -1  -1   37.80   14.80 
 -13  -1   1    5.80   10.00 
 -13  -1   1    0.50    8.50 
  13   1  -1   24.30   14.00 
 -13   1   1   49.10   12.50 
  13   1  -1    8.10   12.20 
 -13   1   1    8.70    7.80 
  12  -1  -1   71.49   19.80 
 -12  -1   1   83.19   20.30 
 -12  -1   1   79.79   21.80 
  12  -1  -1  100.99   26.10 
  12   1  -1   66.89   21.90 
 -12   1   1   80.79   20.30 
  11  -1  -1   18.30   11.40 
  11  -1  -1   -1.10    8.00 
  11  -1  -1   15.10    9.90 
 -11  -1   1   -6.70    8.30 
 -11  -1   1    8.40    8.90 
 -11  -1   1    4.60    6.40 
  11   1  -1   -6.00   10.60 
 -11   1   1   19.20    8.20 
  11   1  -1    3.30    8.30 
 -11   1   1    4.30    5.70 
  10  -1  -1   -1.10    7.90 
 -10  -1   1    3.60    6.80 
 -10  -1   1  -12.00    6.60 
 -10  -1   1    4.80    6.80 
  10  -1  -1   -9.50    9.30 
  10  -1  -1    6.40    9.40 
  10   1  -1   -3.20    6.60 
 -10   1   1    3.30    6.60 
  10   1  -1    0.80   12.50 
   9  -1  -1    7.40    6.80 
  -9  -1   1   -6.60    6.00 
  -9  -1   1   -0.30    6.80 
  -9  -1   1   -0.50    4.70 
   9  -1  -1   17.20    8.60 
   9  -1  -1   -4.80    7.10 
  -9   1   1    7.60    5.70 
  -9   1   1   -1.80    4.80 
   9   1  -1   14.20    8.90 
   9   1  -1    5.40    7.00 
  -8  -1   1    5.10    5.30 
   8  -1  -1    0.20    4.70 
  -8  -1   1    7.10    5.60 
   8  -1  -1    2.10    7.20 
  -8  -1   1   13.10    5.80 
   8  -1  -1    9.10    7.70 
   8   1  -1    5.50    6.70 
  -8   1   1    3.80    5.40 
   8   1  -1    2.50    4.70 
  -8   1   1    6.40    6.40 
  -7  -1   1   69.69   16.10 
   7  -1  -1   64.39   16.20 
  -7  -1   1   76.89   15.90 
  -7  -1   1   59.39   16.60 
   7  -1  -1   68.89   16.70 
   7  -1  -1   50.49   16.30 
  -7   1   1   67.79   16.20 
   7   1  -1   79.69   17.90 
  -7   1   1   64.09   16.90 
   7   1  -1   56.09   16.50 
   6  -1  -1   11.90    5.60 
   6  -1  -1    2.70    7.40 
  -6  -1   1   -1.50    5.60 
  -6  -1   1    9.90    5.50 
   6  -1  -1    8.80    6.50 
  -6  -1   1    2.00    4.40 
  -6   1   1    4.30    5.20 
   6   1  -1   12.90    7.70 
  -6   1   1   14.40    6.70 
   6   1  -1    5.00    4.50 
   5  -1  -1   34.50    9.30 
  -5  -1   1   20.40    7.40 
   5  -1  -1   20.50    8.10 
  -5  -1   1   23.90    7.10 
   5  -1  -1   21.30    7.00 
  -5  -1   1   21.70    7.10 
   5   1  -1   21.70    9.10 
  -5   1   1   27.10    8.10 
   5   1  -1   18.60    8.10 
  -5   1   1   13.80    7.00 
   4  -1  -1  450.25   96.99 
  -4  -1   1  425.26   96.59 
  -4  -1   1  466.75   96.89 
   4  -1  -1  469.25   96.79 
  -4  -1   1  447.96   96.69 
   4  -1  -1  445.66   96.79 
   4   1  -1  453.65   96.99 
   4   1  -1  462.05   96.79 
  -4   1   1  479.35   96.89 
  -4   1   1  428.56   96.69 
  -3  -1   1 9999.00 2057.89 
   3  -1  -1 9543.95 2057.79 
   3  -1  -1 9721.03 2057.89 
   3   1  -1 9463.25 2057.79 
   3   1  -1 9675.23 2057.79 
   2  -1  -1  114.19   25.70 
   2  -1  -1  123.39   25.30 
   2  -1  -1  105.59   25.70 
   2  -1  -1  126.09   25.10 
  -2  -1   1  118.59   25.40 
  -2  -1   1  130.39   25.40 
  -2  -1   1   98.49   25.50 
  -2   1   1  116.29   25.70 
   2   1  -1  116.49   25.80 
  -2   1   1  116.89   25.30 
   2   1  -1  106.79   25.40 
   1  -1  -1   86.19   20.30 
  -1  -1   1   91.09   20.10 
  -1  -1   1   96.69   19.60 
  -1  -1   1   89.79   19.80 
   1   1  -1   88.59   20.10 
  -1   1   1   89.89   20.20 
   1   1  -1   85.89   20.00 
   0  -1  -1  120.49   25.50 
   0  -1   1  119.19   25.40 
   0   1   1  112.69   25.40 
   0   1  -1  114.09   25.40 
  -1  -1  -1  143.99   31.00 
   1  -1   1  153.18   30.90 
   1  -1   1  129.99   31.00 
  -1  -1  -1  123.99   30.70 
   1  -1   1  161.98   30.90 
  -1  -1  -1  163.18   30.90 
  -1   1  -1  138.89   30.90 
  -1   1  -1  153.68   31.10 
   1   1   1  140.99   30.90 
   1   1   1  129.39   30.90 
  -2  -1  -1 1241.58  243.68 
  -2  -1  -1 1067.99  243.38 
   2  -1   1 1101.99  243.68 
   2  -1   1 1096.59  243.38 
  -2  -1  -1 1008.60  243.58 
   2  -1   1 1276.57  243.68 
   2   1   1 1063.89  243.48 
  -2   1  -1 1286.37  243.68 
  -2   1  -1 1136.79  243.48 
   2   1   1 1181.98  243.68 
   3  -1   1  238.68   47.20 
   3  -1   1  211.48   47.00 
  -3  -1  -1  230.68   47.10 
  -3  -1  -1  194.58   46.80 
  -3   1  -1  238.48   47.20 
   3   1   1  216.48   47.20 
  -3   1  -1  221.68   46.80 
   3   1   1  197.18   46.90 
   4  -1   1  396.36   85.49 
  -4  -1  -1  402.06   85.49 
   4  -1   1  421.16   85.69 
  -4   1  -1  402.76   85.39 
  -4   1  -1  413.96   85.59 
   4   1   1  396.86   85.59 
   4   1   1  360.16   85.49 
  -5  -1  -1  258.97   55.29 
  -5  -1  -1  255.37   55.59 
   5  -1   1  288.97   55.99 
   5  -1   1  230.08   55.49 
  -5   1  -1  271.07   55.89 
   5   1   1  255.17   55.89 
   5   1   1  243.78   55.69 
  -6  -1  -1   11.20    6.60 
   6  -1   1    4.80    5.30 
   6  -1   1   19.90    8.80 
  -6  -1  -1   11.80    5.90 
  -6  -1  -1    3.30    5.00 
   6  -1   1   25.50    9.30 
  -6   1  -1    7.50    4.00 
   6   1   1   14.20    8.10 
  -6   1  -1   12.80    6.80 
   6   1   1    8.70    5.30 
  -7  -1  -1   23.30    7.60 
  -7  -1  -1   18.70    7.20 
  -7  -1  -1   22.90    7.10 
   7  -1   1   30.20    9.70 
   7  -1   1   19.70    8.40 
   7  -1   1   10.70    6.50 
   7   1   1   36.80   10.10 
   7   1   1    7.30    6.10 
  -7   1  -1   27.90    8.30 
  -7   1  -1    8.50    5.40 
   8  -1   1   15.90    9.70 
  -8  -1  -1    4.90    5.30 
  -8  -1  -1   31.00    9.10 
   8  -1   1   22.80    9.00 
  -8  -1  -1   16.30    6.60 
   8  -1   1    8.10    6.90 
   8   1   1   15.10    8.20 
  -8   1  -1   14.10    7.20 
   8   1   1    6.20    6.20 
   9  -1   1   20.90    9.10 
   9  -1   1    5.40    7.00 
  -9  -1  -1   18.20    7.90 
  -9  -1  -1    3.10    4.50 
  -9  -1  -1   10.30    6.50 
   9  -1   1   30.60    9.30 
   9   1   1    7.50    7.00 
  -9   1  -1   -0.10    4.60 
   9   1   1   -3.90    7.80 
  -9   1  -1   19.10    8.00 
  10  -1   1   -7.20    6.10 
 -10  -1  -1   -1.70    6.80 
 -10  -1  -1   -1.60    5.20 
  10  -1   1    6.10    8.30 
  10  -1   1  -11.10    9.10 
 -10  -1  -1    8.20    7.00 
 -10   1  -1   -0.40    5.00 
 -10   1  -1   -5.60    7.20 
  10   1   1    1.90    7.00 
  10   1   1    7.80   10.10 
  11  -1   1   22.80   11.40 
 -11  -1  -1   53.19   11.70 
  11  -1   1   41.90   14.80 
 -11  -1  -1   23.10   10.60 
  11  -1   1   49.80   13.80 
 -11  -1  -1   15.80   10.40 
  11   1   1    0.00   11.70 
  11   1   1   42.10   14.10 
 -11   1  -1   25.30   11.50 
 -11   1  -1   30.10   11.40 
  12  -1   1   -5.30   11.90 
 -12  -1  -1   12.90    9.50 
 -12  -1  -1    2.40    6.50 
  12  -1   1   -1.70   10.80 
 -12  -1  -1   -4.40    9.80 
  12  -1   1    5.10   11.60 
 -12   1  -1   11.90   11.20 
 -12   1  -1    2.00    6.00 
  12   1   1   -4.70    9.60 
  12   1   1   -5.80   10.90 
  13  -1   1  155.28   31.40 
  13  -1   1   96.49   26.30 
 -13  -1  -1  106.49   27.50 
 -13  -1  -1  128.09   26.30 
 -13   1  -1   92.89   26.80 
  13   1   1   79.99   26.80 
  13   1   1  120.69   30.20 
 -14  -1  -1  110.59   20.50 
  14  -1   1   75.69   33.30 
  14  -1   1   81.19   20.50 
 -14  -1  -1   58.59   21.10 
 -14  -1  -1   62.79   19.70 
  14  -1   1   41.50   21.80 
 -14   1  -1   63.89   19.90 
  14   1   1   70.49   23.50 
 -14   1  -1   57.89   19.70 
 -15  -1  -1   -0.70   12.80 
 -15  -1  -1  -10.20   14.30 
  15  -1   1    1.90   14.50 
  15  -1   1    2.90   14.30 
  15  -1   1   -6.00   22.30 
  15   1   1   28.90   16.50 
 -15   1  -1   31.20   17.00 
  15   1   1   -0.60   21.10 
 -15   1  -1    6.10    9.50 
 -16  -1  -1   14.40   13.90 
  16  -1   1   14.30   21.70 
  16  -1   1   -2.70   16.60 
 -16  -1  -1   30.50   19.00 
 -16   1  -1   -2.30   11.90 
  16   1   1  -16.20   19.00 
 -16  -2   1  -13.60   18.30 
  16  -2  -1  -10.30   27.00 
 -16   2   1    7.70   14.90 
  16   2  -1    8.00   22.40 
  15  -2  -1   26.90   15.60 
  15  -2  -1   -3.70   23.70 
 -15  -2   1    1.40   13.40 
 -15  -2   1   61.59   19.80 
 -15  -2   1   13.60   14.30 
 -15   2   1    3.30   11.60 
  15   2  -1  -33.80   21.60 
 -15   2   1  -12.00   17.80 
  15   2  -1   -2.30   19.90 
  14  -2  -1   59.99   18.80 
  14  -2  -1   15.00   16.30 
 -14  -2   1   -7.10   11.40 
  14  -2  -1   -6.20   13.80 
 -14  -2   1   10.10   13.00 
 -14  -2   1    4.60   15.70 
 -14   2   1   -6.10   12.90 
  14   2  -1   13.90   16.70 
 -14   2   1   -5.60   10.40 
  14   2  -1    0.00   18.10 
  13  -2  -1  -37.70   20.80 
  13  -2  -1   21.80   14.40 
 -13  -2   1   12.70   13.70 
  13  -2  -1   30.10   14.20 
 -13  -2   1   -0.70   10.70 
 -13  -2   1   22.10   10.90 
 -13   2   1    1.50    9.20 
  13   2  -1   -1.90   22.70 
  12  -2  -1   24.50   15.60 
 -12  -2   1   12.60    9.20 
 -12  -2   1    7.10    8.70 
  12  -2  -1    1.60   10.10 
 -12  -2   1   41.90   12.70 
 -12   2   1   14.60    8.50 
  12   2  -1    8.70   14.40 
  11  -2  -1   19.80   14.30 
  11  -2  -1   -1.30    9.80 
 -11  -2   1    2.60    6.80 
 -11  -2   1    1.20    9.00 
 -11  -2   1   11.50   13.00 
  11  -2  -1  -23.40   11.10 
 -11   2   1   10.30    7.00 
  11   2  -1   10.30   11.10 
  10  -2  -1   -4.00    7.30 
 -10  -2   1   -6.10    8.60 
  10  -2  -1    7.70   10.30 
 -10  -2   1   -0.90    6.00 
 -10  -2   1    8.30    7.20 
  10  -2  -1    5.70   12.70 
  10   2  -1   10.90    8.90 
 -10   2   1   13.30    8.10 
  10   2  -1    9.90   10.20 
 -10   2   1    2.30    5.90 
  -9  -2   1    5.90    5.70 
   9  -2  -1    1.40   11.00 
   9  -2  -1  -18.90    8.40 
  -9  -2   1   -0.10    7.40 
   9  -2  -1   -2.70    5.70 
  -9  -2   1    7.90    7.20 
   9   2  -1   -1.70    7.10 
   9   2  -1   15.40   11.20 
  -9   2   1   -2.00    6.10 
   8  -2  -1   67.59   17.40 
  -8  -2   1   74.59   16.00 
   8  -2  -1   63.99   17.20 
   8  -2  -1   44.50   15.60 
  -8  -2   1   68.09   16.70 
  -8   2   1   64.59   15.80 
   8   2  -1   50.59   16.50 
   8   2  -1  104.29   19.30 
  -8   2   1   50.39   15.80 
  -7  -2   1  126.49   35.50 
   7  -2  -1  187.28   36.50 
  -7  -2   1  175.48   35.60 
   7  -2  -1  135.19   35.70 
  -7  -2   1  190.48   35.70 
   7  -2  -1  186.18   36.50 
   7   2  -1  140.69   35.90 
  -7   2   1  131.09   35.40 
  -7   2   1  185.28   35.60 
   7   2  -1  167.98   36.60 
  -6  -2   1  479.15   96.19 
   6  -2  -1  486.95   96.59 
   6  -2  -1  468.35   96.59 
  -6  -2   1  403.56   96.19 
  -6  -2   1  439.86   96.09 
   6  -2  -1  389.56   96.19 
   6   2  -1  479.35   96.69 
   6   2  -1  414.96   96.29 
  -6   2   1  453.45   96.09 
  -6   2   1  475.25   96.29 
   5  -2  -1  175.88   33.70 
   5  -2  -1  155.78   33.80 
  -5  -2   1  131.39   32.90 
   5  -2  -1  119.99   32.80 
  -5  -2   1  167.78   33.00 
  -5  -2   1  145.29   32.20 
  -5  -2   1  149.39   33.20 
  -5   2   1  146.59   32.90 
   5   2  -1  164.58   33.90 
   5   2  -1  150.48   33.10 
  -5   2   1  165.48   32.90 
  -4  -2   1   64.89   11.80 
   4  -2  -1   45.40   11.30 
   4  -2  -1   40.40   10.50 
  -4  -2   1   27.30    9.80 
  -4  -2   1   43.40   10.40 
   4  -2  -1   58.79   14.10 
  -4   2   1   43.50   10.20 
   4   2  -1   42.70   10.60 
  -4   2   1   27.30    9.60 
   4   2  -1   48.80   11.70 
   3  -2  -1   20.70    6.30 
  -3  -2   1   19.70    7.80 
  -3  -2   1   23.70    7.60 
   3  -2  -1   14.80    8.80 
   3  -2  -1   15.00    7.30 
  -3  -2   1   21.00    6.00 
   3  -2  -1   19.10    6.00 
  -3  -2   1   20.70    6.00 
   3   2  -1   25.50    7.60 
  -3   2   1   20.20    6.00 
   2  -2  -1   61.79   12.40 
  -2  -2   1   46.60   12.90 
  -2  -2   1   53.49   12.70 
   2   2  -1   48.90   12.50 
   2   2  -1   46.60   12.80 
   1  -2  -1   76.69   17.70 
  -1  -2   1   82.39   18.00 
  -1  -2   1   81.29   18.20 
   1  -2  -1   82.99   18.30 
   1   2  -1   70.69   17.70 
   0  -2   1   61.09   13.90 
   0  -2  -1   61.89   13.80 
   0  -2   1   51.89   13.50 
   0  -2  -1   47.70   13.40 
   0   2  -1   57.99   13.10 
  -1  -2  -1  379.16   81.69 
   1  -2   1  368.66   81.49 
  -1  -2  -1  374.06   81.69 
   1  -2   1  386.66   81.89 
  -1   2  -1  398.36   81.49 
  -2  -2  -1   -1.40    5.60 
   2  -2   1    0.70    8.10 
   2  -2   1    2.90    3.90 
  -2  -2  -1    5.60    5.70 
  -2   2  -1    3.20    3.80 
  -2   2  -1    2.60    4.10 
   2   2   1    1.50    4.30 
  -3  -2  -1   85.39   20.70 
   3  -2   1  102.39   21.20 
   3  -2   1  107.09   20.70 
  -3  -2  -1   81.09   20.60 
  -3  -2  -1   73.29   21.50 
  -3  -2  -1   98.79   20.80 
   3  -2   1  101.79   22.20 
   3   2   1   96.79   21.30 
  -3   2  -1  103.49   21.30 
  -3   2  -1   93.59   20.60 
   4  -2   1   46.20   13.20 
  -4  -2  -1   64.49   14.30 
  -4  -2  -1   60.89   12.70 
   4  -2   1   55.19   15.40 
  -4  -2  -1   43.80   12.90 
  -4  -2  -1   62.39   13.50 
   4  -2   1   61.19   14.10 
   4   2   1   48.90   13.50 
  -4   2  -1   47.70   12.90 
  -4   2  -1   73.49   14.10 
   4   2   1   64.99   14.30 
  -5  -2  -1  534.45  113.59 
   5  -2   1  571.64  113.79 
  -5  -2  -1  536.75  113.49 
   5  -2   1  477.55  113.59 
   5  -2   1  523.25  113.99 
  -5  -2  -1  470.45  113.39 
  -5   2  -1  567.94  113.69 
   5   2   1  578.74  113.89 
   5   2   1  510.25  113.69 
  -5   2  -1  545.75  113.49 
  -6  -2  -1   59.19   14.50 
   6  -2   1   62.09   15.20 
  -6  -2  -1   55.09   14.10 
   6  -2   1   67.59   17.70 
   6   2   1   31.50   14.20 
   6   2   1   55.09   14.60 
  -6   2  -1   67.89   15.00 
  -7  -2  -1    5.40    5.90 
  -7  -2  -1    4.10    4.90 
   7  -2   1   21.20    7.50 
   7  -2   1    9.80    6.50 
   7  -2   1   12.70   11.00 
  -7  -2  -1   21.00    7.50 
   7   2   1    5.00    7.50 
  -7   2  -1   13.40    6.70 
  -7   2  -1    8.70    5.40 
   7   2   1    1.20    6.00 
  -8  -2  -1    6.80    7.40 
   8  -2   1    4.40    6.60 
   8  -2   1    3.70   10.20 
   8  -2   1    5.60    7.50 
  -8  -2  -1    3.90    5.40 
  -8  -2  -1    2.40    6.80 
  -8   2  -1    6.50    6.30 
  -8   2  -1   10.50    6.10 
   8   2   1    4.40    7.40 
   8   2   1   -2.40    7.60 
  -9  -2  -1  102.19   23.20 
   9  -2   1  113.09   24.70 
   9  -2   1   77.29   23.90 
   9  -2   1  105.59   24.40 
  -9  -2  -1  101.89   23.10 
  -9   2  -1   67.59   22.40 
   9   2   1   84.19   24.30 
  -9   2  -1  103.99   23.40 
   9   2   1  138.69   26.30 
 -10  -2  -1  229.08   41.30 
  10  -2   1  213.08   42.50 
 -10  -2  -1  202.48   41.40 
  10  -2   1  134.29   41.40 
 -10  -2  -1  144.49   40.80 
  10   2   1  186.98   42.40 
 -10   2  -1  163.58   41.10 
 -10   2  -1  221.88   41.70 
  10   2   1  179.38   42.20 
 -11  -2  -1   21.50   19.90 
 -11  -2  -1   21.00    9.90 
  11  -2   1   25.60   11.90 
 -11  -2  -1   14.60    9.30 
  11  -2   1   24.60   12.20 
  11  -2   1   41.90   16.30 
  11   2   1   10.00   12.60 
 -11   2  -1   22.00   10.30 
  12  -2   1   -0.50   12.50 
 -12  -2  -1   42.10   14.00 
  12  -2   1    2.40   10.40 
 -12  -2  -1   18.80   11.30 
  12  -2   1   37.40   16.40 
 -12  -2  -1   13.00   10.00 
  12   2   1   14.70   12.00 
 -12   2  -1   12.10    9.40 
 -13  -2  -1    4.20    8.90 
  13  -2   1   -7.80   11.80 
 -13  -2  -1   31.30   14.80 
  13  -2   1   32.90   16.90 
  13  -2   1   15.80   15.50 
 -13  -2  -1   -3.70   11.50 
  13   2   1   -1.90   17.30 
 -13   2  -1   16.10   10.90 
  14  -2   1    8.70   19.70 
 -14  -2  -1   -4.30   10.90 
 -14  -2  -1   15.60   13.30 
 -14  -2  -1   17.40   17.30 
  14  -2   1    3.90   14.30 
 -14   2  -1    4.60   13.40 
 -14   2  -1   10.20   10.40 
  14   2   1   25.20   17.90 
  14   2   1   23.50   18.20 
 -15  -2  -1   -2.50   14.70 
  15  -2   1  -13.00   18.50 
 -15  -2  -1    9.90   21.70 
 -15  -2  -1   11.10   11.90 
  15  -2   1   37.40   24.50 
  15   2   1   -1.40   18.40 
 -15   2  -1   27.10   12.90 
 -16  -2  -1   -6.90   17.70 
 -16   2  -1   13.90   13.00 
  16   2   1   -4.90   21.20 
  15  -3  -1   82.39   29.40 
 -15  -3   1   87.09   26.80 
 -15  -3   1   16.20   17.90 
 -15   3   1   18.70   15.10 
  15   3  -1  -27.30   22.20 
 -14  -3   1   12.10   21.90 
 -14  -3   1   29.40   13.50 
  14  -3  -1   86.89   23.20 
 -14  -3   1   26.70   14.80 
  14  -3  -1  -18.20   17.30 
 -14   3   1    3.30   14.50 
  14   3  -1    1.60   19.60 
 -14   3   1   23.80   17.80 
  13  -3  -1   -1.40   18.20 
  13  -3  -1    8.70   14.10 
 -13  -3   1   10.00   16.60 
 -13  -3   1  -14.30   12.30 
 -13  -3   1    4.50   11.40 
  13   3  -1   -4.70   19.20 
 -13   3   1   11.60   11.10 
  13   3  -1    2.70   16.80 
 -13   3   1   -0.20   14.80 
  12  -3  -1  -15.70   12.40 
 -12  -3   1   -0.40   10.80 
  12  -3  -1  -19.30   14.90 
 -12  -3   1    4.20    9.80 
 -12   3   1   -0.90    9.60 
  12   3  -1    5.30   14.20 
  12   3  -1   56.69   18.80 
 -12   3   1    3.20   12.10 
 -11  -3   1   38.90   12.40 
  11  -3  -1   10.00   12.90 
  11  -3  -1   27.20   15.60 
 -11  -3   1   27.30   11.20 
 -11   3   1   33.40   11.40 
  11   3  -1   36.10   14.90 
 -10  -3   1   37.70   11.70 
  10  -3  -1   19.80   12.70 
  10  -3  -1    9.20   10.50 
  10  -3  -1   28.40   16.20 
 -10  -3   1    4.00    7.60 
 -10  -3   1   18.20    8.50 
  10   3  -1   14.60   13.80 
  10   3  -1   21.20   12.30 
 -10   3   1    1.60    9.00 
 -10   3   1    1.50    8.10 
  -9  -3   1    9.70    7.30 
  -9  -3   1   13.70    7.70 
   9  -3  -1   11.00    9.80 
   9  -3  -1   32.60   16.20 
  -9  -3   1   17.40   10.60 
   9  -3  -1    3.40   10.80 
   9   3  -1    6.30   11.00 
  -9   3   1    6.40    7.10 
  -9   3   1    3.60    8.10 
   9   3  -1   28.50   11.90 
  -8  -3   1   55.19   17.70 
   8  -3  -1   82.19   21.10 
  -8  -3   1   67.09   17.80 
  -8  -3   1   93.79   19.30 
   8  -3  -1   84.59   19.50 
   8  -3  -1   77.99   19.40 
  -8   3   1   77.29   18.30 
   8   3  -1   87.09   20.00 
  -8   3   1   63.39   18.10 
   8   3  -1   50.49   19.00 
  -7  -3   1   41.30   10.10 
  -7  -3   1   54.49   12.00 
  -7  -3   1   16.30    9.10 
   7  -3  -1   41.30   12.40 
   7  -3  -1   53.69   17.00 
   7  -3  -1   26.70   10.90 
  -7   3   1   27.70    9.50 
  -7   3   1   33.60   10.30 
   7   3  -1   26.10   10.70 
   6  -3  -1   13.90   12.60 
  -6  -3   1    5.90    5.30 
   6  -3  -1   -7.50    5.40 
  -6  -3   1    2.40    7.30 
   6  -3  -1   -0.50    7.00 
  -6  -3   1    1.10    4.50 
  -6  -3   1    4.40    4.80 
   6   3  -1    7.10    8.30 
   6   3  -1    9.10    6.40 
  -6   3   1   -1.30    5.20 
  -6   3   1    4.20    4.00 
  -5  -3   1   44.90   10.20 
   5  -3  -1   28.00   11.10 
   5  -3  -1   41.90   14.40 
   5  -3  -1   30.30   10.50 
   5  -3  -1   29.50   10.00 
  -5  -3   1   52.09   11.20 
  -5  -3   1   50.39   12.40 
   5   3  -1   44.80   12.30 
   5   3  -1   37.60   11.10 
  -5   3   1   40.30   10.40 
  -4  -3   1   39.50   11.20 
  -4  -3   1   34.30   10.30 
  -4  -3   1   57.69   13.10 
   4  -3  -1   43.10   11.00 
   4  -3  -1   56.89   14.90 
  -4   3   1   40.30   10.50 
   4   3  -1   53.29   12.20 
  -3  -3   1   18.40    9.40 
   3  -3  -1   30.20   12.20 
  -3  -3   1   24.40    9.40 
   3  -3  -1   29.30    8.10 
   3   3  -1   25.60    7.70 
  -2  -3   1   14.10    7.40 
   2  -3  -1   16.10    6.60 
  -2  -3   1   11.10    8.80 
   2  -3  -1   24.30   10.00 
  -1  -3   1   69.29   15.60 
   1  -3  -1   58.99   15.00 
   1  -3  -1   42.50   12.80 
  -1  -3   1   42.20   13.40 
   0  -3  -1   75.29   18.60 
   0  -3   1   64.59   18.70 
   0  -3   1   84.79   18.60 
   0  -3  -1   90.69   18.90 
  -1  -3  -1   78.59   16.80 
  -1  -3  -1   60.39   16.70 
   1  -3   1   70.89   15.60 
   1  -3   1   58.59   16.70 
  -2  -3  -1   66.09   14.20 
  -2  -3  -1   49.80   13.40 
   2  -3   1   48.10   12.60 
  -3  -3  -1   45.30   13.70 
   3  -3   1   41.90   12.00 
   3  -3   1   48.70   15.90 
  -3  -3  -1   61.69   13.60 
   4  -3   1   21.40    6.20 
  -4  -3  -1   23.60    5.20 
  -4  -3  -1    8.50    4.50 
  -4  -3  -1   25.20    7.20 
   4  -3   1   14.30   11.40 
   4  -3   1    8.30    5.70 
  -4  -3  -1   13.60    8.30 
  -4   3  -1   11.80    5.60 
   4   3   1    3.30    6.50 
   5  -3   1    9.30    8.10 
   5  -3   1   25.30    7.40 
  -5  -3  -1   30.90    8.40 
   5  -3   1   56.69   10.00 
  -5  -3  -1   35.50    8.40 
  -5  -3  -1   26.60    9.70 
   5  -3   1   47.20   14.50 
  -5  -3  -1   14.90    7.30 
   5   3   1   34.10   10.20 
  -5   3  -1   37.90    8.80 
   5   3   1   26.30    8.70 
  -5   3  -1   20.90    7.30 
  -6  -3  -1  131.09   28.30 
   6  -3   1  160.88   29.00 
  -6  -3  -1  146.99   30.30 
  -6  -3  -1  108.69   27.80 
   6  -3   1   96.89   28.40 
  -6   3  -1  149.99   28.30 
  -6   3  -1  113.09   27.70 
   6   3   1  150.28   29.50 
   6   3   1  105.49   28.70 
  -7  -3  -1   14.90    7.90 
  -7  -3  -1   32.40   10.80 
   7  -3   1   39.60   15.40 
   7  -3   1   41.00   11.20 
   7  -3   1   20.30    9.50 
  -7   3  -1   19.30    8.20 
  -7   3  -1   30.20    9.30 
   7   3   1   15.80   10.50 
   7   3   1   45.40   10.70 
  -8  -3  -1   34.10    9.80 
  -8  -3  -1   37.80   11.90 
  -8  -3  -1   37.30   10.30 
   8  -3   1   16.40   10.50 
   8  -3   1   23.70   11.40 
  -8   3  -1   43.40   10.80 
   8   3   1   29.80   12.60 
   8   3   1   18.50   11.60 
  -8   3  -1   23.90    9.20 
   9  -3   1    9.40    9.10 
  -9  -3  -1    3.90    7.20 
  -9  -3  -1    1.20    8.30 
  -9  -3  -1   22.70   10.40 
   9  -3   1   11.40   10.60 
   9  -3   1   25.90   23.50 
  -9   3  -1   12.00    6.70 
  -9   3  -1   19.20    8.70 
   9   3   1    1.70   10.60 
   9   3   1   20.20   11.70 
 -10  -3  -1  -14.50   10.70 
  10  -3   1   43.60   18.00 
 -10  -3  -1    3.20    7.20 
 -10  -3  -1   12.00    9.60 
  10  -3   1    1.80    9.20 
  10  -3   1   32.90   12.90 
 -10   3  -1    5.80    7.30 
  10   3   1    7.00   13.00 
 -10   3  -1    3.10    8.70 
  10   3   1    8.90   11.30 
 -11  -3  -1    3.50    7.20 
 -11  -3  -1   -7.40   10.20 
 -11  -3  -1    8.10   14.50 
  11  -3   1   17.50   13.10 
  11  -3   1    7.70   10.30 
  11   3   1    2.40   17.60 
 -11   3  -1   11.20    8.00 
  11   3   1   23.90   14.60 
 -12  -3  -1    3.30    8.80 
  12  -3   1   -5.20   12.60 
 -12  -3  -1    3.50   11.20 
  12  -3   1   42.70   17.90 
 -12   3  -1    8.10   12.00 
  12   3   1    5.30   14.10 
 -12   3  -1    7.10    9.00 
  12   3   1   16.10   16.50 
  13  -3   1   16.60   15.40 
 -13  -3  -1   -3.00   10.20 
 -13  -3  -1   63.79   19.40 
 -13  -3  -1   18.00   14.10 
  13  -3   1   45.30   23.00 
  13   3   1  -43.20   19.40 
 -13   3  -1   16.80   11.20 
  13   3   1   27.00   19.00 
 -13   3  -1  -25.80   14.70 
 -14  -3  -1   -7.00   11.30 
  14  -3   1   44.40   23.90 
 -14  -3  -1   49.70   22.30 
  14  -3   1    1.00   17.30 
 -14  -3  -1  -17.80   14.50 
 -14   3  -1   18.30   19.90 
  14   3   1  -19.90   18.90 
 -13  -4   1   47.00   17.70 
  13  -4  -1    1.60   19.30 
 -13  -4   1   36.50   14.50 
 -13   4   1   17.00   13.70 
  13   4  -1   -1.50   21.80 
 -12  -4   1   33.90   13.00 
 -12  -4   1   30.40   15.00 
 -12  -4   1   89.19   19.60 
  12  -4  -1   18.30   17.00 
  12  -4  -1   -4.10   20.80 
 -12   4   1   12.80   13.20 
  12   4  -1   34.20   24.50 
 -12   4   1    7.00   15.40 
  12   4  -1   29.40   18.40 
 -11  -4   1   28.20   11.40 
  11  -4  -1   23.20   18.80 
 -11  -4   1   29.20   12.80 
  11  -4  -1   12.70   15.00 
  11   4  -1   -7.60   16.60 
 -11   4   1   26.30   13.10 
 -11   4   1   18.00   11.30 
  11   4  -1   39.40   21.10 
  10  -4  -1   38.50   16.00 
  10  -4  -1   14.70   12.80 
 -10  -4   1    3.80    8.70 
 -10  -4   1    2.30   14.40 
  10  -4  -1   66.39   22.80 
 -10  -4   1   22.40   10.20 
  10   4  -1  -19.10   14.00 
 -10   4   1   15.70    9.50 
  10   4  -1    7.10   17.60 
  -9  -4   1    3.50    8.70 
  -9  -4   1   42.30   11.80 
   9  -4  -1    9.00   10.60 
   9  -4  -1  -13.10   12.60 
  -9  -4   1   15.30    7.80 
  -9   4   1    9.50    9.50 
   9   4  -1   12.90   13.00 
   9   4  -1  -24.30   24.80 
  -9   4   1    5.30    7.60 
   8  -4  -1   11.40   11.70 
  -8  -4   1    2.50    7.20 
  -8  -4   1   16.20    6.90 
   8  -4  -1   28.80   12.10 
  -8   4   1    8.50    6.30 
   8   4  -1  -21.40   11.20 
   8   4  -1   17.00   13.40 
  -8   4   1   -9.70    7.70 
  -7  -4   1   12.50    6.10 
  -7  -4   1    7.30    6.60 
   7  -4  -1  -11.60    8.10 
   7  -4  -1   16.80   13.90 
  -7  -4   1    2.70    5.60 
   7   4  -1   -5.00    8.40 
  -7   4   1   12.20    5.20 
  -7   4   1    4.70    6.70 
   7   4  -1    1.20   11.50 
  -6  -4   1   -1.20    4.60 
  -6  -4   1   -2.70    7.30 
   6  -4  -1   20.30    6.50 
   6   4  -1   -4.00    7.80 
   6   4  -1    4.90   10.80 
  -6   4   1    1.90    5.60 
   5  -4  -1   20.10    8.70 
   5  -4  -1   32.30   17.10 
  -4  -4   1   13.60   10.30 
   4  -4  -1   -5.10   14.90 
   4  -4  -1   21.40    8.00 
  -4  -4   1    1.30    9.80 
  -3  -4   1    3.20    9.80 
  -3  -4   1    4.70    8.80 
   3  -4  -1   -8.10   13.20 
   3  -4  -1   10.10    7.40 
   2  -4  -1   46.20   16.80 
  -2  -4   1   35.00   12.00 
  -2  -4   1   47.00   15.10 
   2  -4  -1   28.40   11.60 
   1  -4  -1    6.10    7.30 
  -1  -4   1    9.30   11.40 
   1  -4  -1   -9.90   11.70 
   0  -4  -1    4.20    8.20 
   0  -4  -1   34.80   11.40 
   0  -4   1   -0.60    7.50 
   0  -4   1   29.10   11.90 
  -1  -4  -1   16.70   11.20 
   1  -4   1   10.70    7.50 
   1  -4   1   28.30   15.40 
  -1  -4  -1    5.90   11.20 
   2  -4   1  109.89   25.20 
  -2  -4  -1   93.69   21.60 
  -2  -4  -1   94.49   22.20 
   2  -4   1   60.19   19.90 
   3  -4   1   15.20   14.80 
  -3  -4  -1    9.30    8.70 
  -3  -4  -1    4.70    9.50 
   3  -4   1   22.00    7.90 
   4  -4   1   41.00   20.40 
  -4  -4  -1   49.10   14.90 
  -4  -4  -1   55.09   15.30 
   5  -4   1   65.09   22.10 
   5  -4   1   50.89   13.00 
  -5  -4  -1   45.10   13.70 
   5   4   1   57.09   15.80 
  -6  -4  -1   18.30    7.10 
  -6  -4  -1   32.80    8.60 
   6   4   1   38.50   13.80 
   6   4   1   -3.30    9.40 
  -6   4  -1   40.60    9.20 
  -7  -4  -1   -0.70    6.10 
   7  -4   1    0.80    9.80 
  -7  -4  -1    7.80    5.30 
   7  -4   1    2.20    8.30 
   7   4   1   -5.80    9.50 
  -7   4  -1   -2.20    6.20 
   7   4   1    3.20   10.50 
  -7   4  -1   -1.80    6.70 
   8  -4   1   22.80   11.40 
  -8  -4  -1    6.30    6.80 
  -8  -4  -1    7.20    7.20 
   8  -4   1   10.00   11.10 
  -8   4  -1   11.20    8.90 
  -8   4  -1    8.80    7.60 
   8   4   1   -5.80   13.20 
   8   4   1   -3.80   11.70 
   9  -4   1   17.40   14.10 
  -9  -4  -1    6.30   12.80 
   9  -4   1   34.20   22.80 
  -9  -4  -1   11.30    9.00 
  -9  -4  -1    3.50    7.60 
   9  -4   1    8.70   11.90 
   9   4   1  -11.90   13.50 
  -9   4  -1   18.40    8.70 
  -9   4  -1   17.80   11.40 
 -10  -4  -1    7.90    9.80 
 -10  -4  -1    4.40   15.70 
  10  -4   1   54.19   25.20 
  10  -4   1   18.70   16.10 
  10  -4   1   -9.40   13.50 
 -10  -4  -1    3.10    8.80 
  10   4   1   -1.30   15.60 
 -10   4  -1   -2.20   10.90 
 -10   4  -1    4.60    8.60 
  10   4   1    8.80   17.70 
 -11  -4  -1   46.70   17.30 
 -11  -4  -1    8.30    9.80 
 -11  -4  -1    4.20   11.10 
  11  -4   1  -16.90   17.20 
  11  -4   1   68.69   27.60 
  11  -4   1  -11.10   15.10 
  11   4   1   -5.70   19.90 
 -11   4  -1   12.30   12.60 
 -11   4  -1   -5.10    9.80 
  11   4   1  -21.30   16.90 
 -12  -4  -1   12.10   11.60 
  12  -4   1  -14.50   17.00 
  12  -4   1    1.50   20.40 
 -12  -4  -1   23.70   13.00 
  12  -4   1   84.09   32.50 
 -12  -4  -1   60.89   21.90 
  12   4   1   34.20   25.30 
  12   4   1   -6.70   18.70 
 -12   4  -1    2.50   12.00 
 -12   4  -1    5.40   15.30 
 -10  -5   1    7.90   10.10 
  10  -5  -1   -3.10   17.00 
 -10   5   1  -11.30   12.10 
  -9  -5   1    9.90    8.20 
   9   5  -1  -40.30   21.10 
   9   5  -1    9.20   16.10 
   8  -5  -1   70.59   30.00 
  -8  -5   1   46.00   19.30 
  -7  -5   1   28.20   14.10 
  -6  -5   1   36.90   17.40 
   6  -5  -1   83.09   26.80 
   5  -5  -1   48.70   21.90 
  -5  -5   1   11.50   11.80 
  -5  -5   1   18.30   12.50 
   5  -5  -1    3.10   13.00 
  -4  -5   1    0.80   18.80 
  -4  -5   1   18.60   13.30 
   4  -5  -1   26.50   11.00 
   4  -5  -1   51.89   20.30 
   3  -5  -1   12.10   18.10 
   3  -5  -1   30.90   10.50 
  -3  -5   1   -2.80   12.80 
  -3  -5   1    8.90   12.30 
   2  -5  -1   -6.30   10.00 
  -2  -5   1   17.80   10.60 
  -2  -5   1    8.00   13.20 
   2  -5  -1  -27.70   14.60 
  -1  -5   1   16.70   14.50 
  -1  -5   1   -1.30   10.60 
   1  -5  -1    9.90   14.60 
   1  -5  -1   -2.90   10.30 
   0  -5  -1  -12.10   11.90 
   0  -5  -1   20.80   13.60 
   0  -5   1   34.60   15.60 
   0  -5   1    5.80   10.90 
  -1  -5  -1   33.40   15.60 
   1  -5   1   34.20   18.50 
  -1  -5  -1   29.70   13.50 
  -2  -5  -1   25.90   12.80 
   2  -5   1    5.40   10.10 
  -2  -5  -1    9.10   13.30 
   2  -5   1   31.90   17.70 
  -3  -5  -1   -3.60   12.00 
   3  -5   1   -3.00    9.20 
   3  -5   1   -2.50   18.60 
  -3  -5  -1    3.10   12.80 
  -4  -5  -1    8.30   14.10 
   4  -5   1   46.20   11.80 
   4  -5   1   35.40   20.60 
  -4  -5  -1   11.40   14.50 
  -5  -5  -1   56.49   18.40 
   5  -5   1   30.40   16.00 
   5  -5   1   87.79   26.20 
  -5  -5  -1   49.20   15.00 
   6  -5   1  125.49   29.00 
  -6  -5  -1   25.70   18.60 
  -7  -5  -1   -6.10   16.70 
   7  -5   1   53.79   27.30 
   8  -5   1   91.19   35.80 
  -8  -5  -1   43.20   22.60 
  -9   5  -1   14.50   11.60 
   9   5   1   26.90   21.30 
  10  -5   1   14.20   18.90 
 -10  -5  -1    7.60   10.10 
  10   5   1   71.49   24.80 
 -10   5  -1    3.40   13.40 
   4  -6  -1   15.10   17.10 
  -4  -6   1   34.70   19.10 
   3  -6  -1    3.50   16.10 
   3  -6  -1   14.10   42.70 
  -2  -6   1   29.80   17.80 
   2  -6  -1   31.10   18.00 
   2  -6  -1   52.29   25.90 
   1  -6  -1  -20.50   16.30 
   1  -6  -1   43.20   24.50 
  -1  -6   1   57.79   21.90 
  -1  -6   1   15.60   16.60 
   0  -6  -1   69.79   24.90 
   0  -6  -1   57.39   22.20 
   0  -6   1   33.40   21.40 
  -1  -6  -1    9.20   17.70 
   1  -6   1   -1.00   16.10 
   1  -6   1   67.69   26.80 
  -1  -6  -1   44.50   21.20 
  -2  -6  -1   47.20   19.40 
   2  -6   1    6.30   16.40 
   2  -6   1   47.10   25.70 
  -2  -6  -1   29.30   20.10 
  -3  -6  -1   45.60   20.60 
  -4  -6  -1   46.90   16.60 
   4  -6   1  -19.90   15.30 
 -17   0   2   16.90   17.40 
  17   0  -2   16.30   34.20 
  17   0  -2  -19.80   19.50 
 -16   0   2   59.49   17.60 
  16   0  -2   18.20   17.30 
  16   0  -2  -14.40   22.30 
 -16   0   2   28.20   14.10 
 -15   0   2   49.30   14.40 
 -15   0   2   32.50   12.00 
  15   0  -2   19.80    9.70 
  15   0  -2   17.20   16.70 
  14   0  -2   -7.50   14.70 
  14   0  -2   -2.90   16.90 
 -14   0   2   13.20   12.20 
 -14   0   2   10.50    9.10 
  14   0  -2   -2.20    7.10 
  13   0  -2   19.00    7.70 
 -13   0   2   17.00   10.00 
  13   0  -2   12.40   13.30 
  13   0  -2    4.40   12.90 
  12   0  -2    6.60   12.50 
 -12   0   2    2.70    8.20 
  12   0  -2   11.40    6.60 
  12   0  -2    0.90   11.40 
 -12   0   2    0.80    8.60 
 -11   0   2    1.50    5.30 
 -11   0   2    6.80   16.80 
  11   0  -2    1.90    6.10 
  11   0  -2   12.10   10.30 
  11   0  -2   -6.30    9.00 
 -10   0   2    4.90    6.30 
  10   0  -2    8.80    6.90 
  10   0  -2   21.20    7.20 
 -10   0   2   20.40    8.60 
  10   0  -2    8.70    9.80 
   9   0  -2   26.90    9.40 
   9   0  -2   13.70    8.60 
  -9   0   2    3.60    7.50 
   9   0  -2   26.70    7.70 
  -9   0   2   16.30    6.80 
  -8   0   2   -0.60    5.60 
   8   0  -2    3.70    6.20 
   8   0  -2   -8.60    5.00 
   8   0  -2    0.80    7.10 
  -8   0   2    1.50    5.00 
   7   0  -2   52.89   15.50 
  -7   0   2   45.50   14.00 
   7   0  -2   57.39   13.40 
  -6   0   2   11.20    6.50 
   6   0  -2   14.30    7.80 
  -6   0   2   10.40    6.60 
   6   0  -2    7.60    5.50 
   6   0  -2    9.00    4.80 
  -5   0   2  218.28   47.30 
  -5   0   2  220.98   48.00 
   5   0  -2  226.58   47.30 
   5   0  -2  215.58   47.80 
   5   0  -2  218.78   48.40 
  -4   0   2  833.12  179.28 
   4   0  -2  835.72  179.38 
  -4   0   2  846.72  178.98 
   4   0  -2  881.81  179.68 
  -4   0   2  814.02  179.08 
   4   0  -2  810.62  178.98 
  -4   0   2  859.91  179.48 
   4   0  -2  853.21  179.08 
   3   0  -2 1251.87  270.07 
  -3   0   2 1231.58  270.07 
  -3   0   2 1247.98  270.37 
   3   0  -2 1322.97  270.47 
   3   0  -2 1305.87  270.07 
  -3   0   2 1215.18  270.07 
  -3   0   2 1317.27  270.27 
   2   0  -2  138.59   29.10 
   2   0  -2  141.79   28.30 
   2   0  -2  134.19   28.50 
  -2   0   2  143.09   28.60 
   2   0  -2  110.19   28.20 
  -2   0   2  124.69   28.70 
  -2   0   2  129.49   28.30 
  -1   0  -2 1883.51  390.16 
   1   0   2 1795.42  390.16 
  -1   0  -2 1812.82  390.06 
   1   0   2 1841.92  390.06 
   2   0   2 3695.93  855.81 
   2   0   2 4390.96  855.81 
  -2   0  -2 3808.32  855.71 
  -2   0  -2 4210.08  855.91 
   3   0   2  185.28   42.70 
  -3   0  -2  212.38   42.90 
  -3   0  -2  191.58   42.40 
   3   0   2  198.08   42.60 
   4   0   2   52.29   14.30 
   4   0   2   72.09   14.90 
  -4   0  -2   53.69   13.60 
  -5   0  -2   23.80    7.80 
   5   0   2   30.60    9.10 
   5   0   2   43.30   10.00 
  -5   0  -2   35.90    9.40 
   6   0   2  175.28   34.10 
   6   0   2  132.49   33.50 
  -6   0  -2  184.98   34.20 
  -6   0  -2  130.09   33.10 
   7   0   2    4.20    5.90 
   7   0   2   -1.10    7.40 
  -7   0  -2   -0.80    3.90 
  -7   0  -2    1.60    7.50 
   8   0   2   -0.40    5.20 
  -8   0  -2   18.20    7.80 
  -8   0  -2   -4.40    3.70 
   8   0   2   -4.20    6.40 
  -9   0  -2    3.60    8.40 
   9   0   2    1.10    6.80 
   9   0   2   -0.50    9.40 
   9   0   2    5.30    6.80 
  -9   0  -2    1.70    5.40 
 -10   0  -2    4.10    6.10 
  10   0   2   19.10    8.30 
  10   0   2   13.90    8.20 
 -10   0  -2   18.00    8.10 
  10   0   2    9.50    8.90 
  11   0   2   -1.80    9.10 
  11   0   2   37.20    9.70 
 -11   0  -2    3.70    6.40 
 -11   0  -2   16.60    9.10 
  11   0   2   12.30   11.60 
  12   0   2   14.70   12.20 
  12   0   2   -0.30   11.70 
 -12   0  -2    2.90    8.40 
  12   0   2   27.00   10.40 
 -12   0  -2   17.70   10.10 
  13   0   2   12.70    9.10 
  13   0   2   -9.20    9.80 
  13   0   2   -9.40   13.40 
 -13   0  -2    5.90   11.50 
  14   0   2   38.30   11.50 
 -14   0  -2   40.10   14.10 
  14   0   2   33.70   16.60 
  14   0   2   16.10   15.10 
 -14   0  -2   10.20   10.60 
  15   0   2   49.30   18.60 
 -15   0  -2   38.30   15.50 
 -15   0  -2   57.19   18.20 
  15   0   2   60.49   21.90 
  16   0   2   25.40   24.10 
  16   0   2   51.39   12.60 
  16   0   2  -12.00   18.50 
 -16   0  -2   19.80   18.50 
 -16   0  -2   -2.70   15.40 
  16  -1  -2   15.50   26.00 
  16  -1  -2    8.00   15.50 
 -16  -1   2   -3.80   13.30 
  16  -1  -2   11.00   13.50 
 -16  -1   2    3.40   12.80 
  16   1  -2   15.00   23.70 
 -16   1   2   -6.30   12.90 
  16   1  -2   -3.90   21.80 
 -16   1   2  -18.40   17.70 
 -15  -1   2   -2.20   12.20 
  15  -1  -2  -11.70   13.30 
 -15  -1   2  -20.50   13.20 
 -15  -1   2  -18.60   13.60 
  15  -1  -2  -11.90   17.40 
  15   1  -2   14.90   17.80 
 -15   1   2   14.00   11.10 
 -15   1   2   18.50   14.10 
  15   1  -2  -14.20   19.80 
  14  -1  -2   15.90   15.80 
 -14  -1   2    4.00   11.20 
 -14  -1   2   20.30   13.10 
 -14  -1   2   30.00   12.40 
  14  -1  -2    2.70   14.70 
  14  -1  -2   24.30   10.70 
 -14   1   2  -15.40   11.30 
  14   1  -2   19.60   14.20 
 -14   1   2   13.10   11.20 
  14   1  -2  -25.70   16.00 
 -13  -1   2   10.40    9.90 
 -13  -1   2   -3.90    9.00 
  13  -1  -2   10.60   10.50 
  13  -1  -2   -0.60    9.60 
  13  -1  -2   -1.80   12.70 
 -13  -1   2   -4.00   10.30 
  13   1  -2  -23.00   11.70 
  13   1  -2    4.80   11.00 
 -13   1   2   -4.10    9.40 
 -13   1   2   25.60   12.00 
 -12  -1   2    5.10    6.90 
 -12  -1   2    6.30    8.40 
  12  -1  -2    3.70    9.50 
  12  -1  -2   30.50   12.40 
  12  -1  -2   14.90   10.30 
 -12  -1   2   -5.30    9.70 
 -12   1   2    9.40    7.60 
  12   1  -2   -0.90   11.60 
 -12   1   2   -3.70    9.00 
  12   1  -2    4.40   10.40 
 -11  -1   2    5.00    8.60 
  11  -1  -2    2.60    9.50 
  11  -1  -2   -0.50    9.30 
 -11  -1   2    6.20    8.00 
 -11  -1   2   13.70    8.10 
  11  -1  -2    3.40   10.00 
  11   1  -2   -1.60    9.00 
 -11   1   2   -7.60    6.20 
 -11   1   2    0.20    7.60 
  11   1  -2  -10.50    9.70 
  10  -1  -2   -0.80    7.70 
  10  -1  -2    5.40    9.00 
 -10  -1   2   -0.10    7.10 
  10  -1  -2   14.70    9.20 
 -10  -1   2    1.90    6.70 
 -10  -1   2   15.00    7.80 
 -10   1   2    1.90   11.00 
  10   1  -2   17.10   11.70 
  10   1  -2    1.20    6.50 
 -10   1   2    3.50    6.40 
  -9  -1   2   -1.60    5.50 
   9  -1  -2  -11.90    6.80 
  -9  -1   2   -4.30    6.00 
  -9  -1   2    4.30    6.10 
   9  -1  -2   -7.10    7.20 
   9  -1  -2    4.50    6.70 
   9   1  -2   -1.00   12.40 
  -9   1   2    5.60    6.40 
  -9   1   2   -3.40    6.10 
   9   1  -2    8.30    7.80 
  -8  -1   2   30.10    8.30 
   8  -1  -2   30.20    9.10 
   8  -1  -2   26.40   10.10 
  -8  -1   2   18.60    8.40 
  -8  -1   2   30.90    8.30 
   8  -1  -2   13.40    7.90 
   8   1  -2   21.70    9.00 
   8   1  -2   15.10    9.20 
  -8   1   2   17.10    8.40 
  -8   1   2   18.70    8.50 
   7  -1  -2   10.10    6.70 
  -7  -1   2   13.30    7.60 
   7  -1  -2   25.30    9.30 
   7  -1  -2   41.90   10.60 
  -7  -1   2   22.30    8.50 
  -7  -1   2   26.00    7.70 
  -7   1   2   22.10    7.80 
  -7   1   2   17.00    7.60 
   7   1  -2   27.90    9.00 
   7   1  -2   15.40    7.20 
  -6  -1   2  122.09   26.60 
   6  -1  -2  131.09   27.30 
  -6  -1   2  133.19   26.40 
   6  -1  -2  111.09   26.40 
   6  -1  -2  110.29   26.40 
  -6  -1   2  106.29   26.10 
   6   1  -2  103.69   26.20 
   6   1  -2  118.79   27.40 
  -6   1   2  123.79   26.50 
  -6   1   2  127.19   26.40 
   5  -1  -2  132.89   30.10 
  -5  -1   2  124.89   29.40 
  -5  -1   2  123.69   29.00 
  -5  -1   2  134.89   29.20 
   5  -1  -2  129.09   29.30 
   5  -1  -2  129.39   29.20 
  -5   1   2  130.99   29.40 
  -5   1   2  130.99   29.20 
   5   1  -2  142.79   29.30 
   5   1  -2  147.79   30.20 
   5   1  -2  135.49   28.80 
  -4  -1   2    0.50    5.00 
   4  -1  -2   13.10    6.80 
  -4  -1   2    3.70    4.90 
   4  -1  -2    4.30    6.50 
   4  -1  -2   11.50    4.50 
  -4  -1   2    0.80    5.20 
   4   1  -2    0.40    6.40 
   4   1  -2    3.10    4.00 
  -4   1   2    3.20    4.30 
   4   1  -2    3.80    4.20 
  -4   1   2    0.70    4.30 
  -4   1   2   -0.20    5.50 
   3  -1  -2 5228.28 1115.99 
  -3  -1   2 5028.90 1115.89 
   3  -1  -2 5516.35 1116.09 
   3  -1  -2 5053.39 1115.89 
  -3  -1   2 5454.35 1116.09 
   3   1  -2 5514.75 1116.09 
  -3   1   2 5157.18 1115.99 
  -3   1   2 5368.86 1116.09 
  -3   1   2 5063.29 1115.89 
   3   1  -2 5156.88 1115.89 
   3   1  -2 5214.58 1115.89 
   2  -1  -2 6151.58 1273.47 
   2  -1  -2 5920.21 1273.47 
  -2  -1   2 6199.78 1273.47 
  -2  -1   2 6038.60 1273.37 
   2  -1  -2 5595.54 1273.27 
  -2   1   2 5849.51 1273.47 
   2   1  -2 6177.68 1273.47 
   2   1  -2 5988.10 1273.37 
  -1  -1   2   36.80   11.00 
  -1  -1   2   51.49   10.50 
  -1  -1   2   45.20   11.20 
   1  -1  -2   47.00   10.30 
   1  -1  -2   43.70   11.50 
   1  -1  -2   54.39   11.70 
   1   1  -2   68.79   12.00 
  -1   1   2   39.40   11.20 
   1   1  -2   43.80   11.00 
  -1   1   2   40.90   10.40 
   0  -1   2   84.69   16.80 
   0  -1   2   75.19   17.30 
   0  -1  -2   72.19   17.30 
   0  -1   2   78.39   17.30 
   0   1  -2   75.59   17.70 
   0   1   2   70.79   16.80 
   0   1  -2   85.29   17.20 
   0   1   2   75.49   17.40 
   1  -1   2  610.94  128.49 
  -1  -1  -2  510.55  128.39 
   1  -1   2  665.13  128.49 
   1  -1   2  575.44  128.59 
  -1  -1  -2  646.04  128.59 
  -1  -1  -2  593.14  128.49 
  -1   1  -2  621.14  128.69 
   1   1   2  590.34  128.49 
  -1   1  -2  620.34  128.49 
   1   1   2  605.64  128.49 
  -2  -1  -2  625.24  149.79 
   2  -1   2  796.02  149.88 
  -2  -1  -2  783.32  149.99 
   2  -1   2  670.33  149.88 
   2   1   2  678.13  149.69 
  -2   1  -2  687.43  149.79 
  -2   1  -2  669.33  149.69 
   2   1   2  702.43  149.88 
  -2   1  -2  771.82  150.08 
   2   1   2  662.13  149.88 
   3  -1   2  207.48   39.20 
   3  -1   2  160.38   39.00 
  -3  -1  -2  172.08   38.90 
  -3  -1  -2  195.98   39.30 
  -3   1  -2  198.38   39.40 
   3   1   2  165.98   39.00 
   3   1   2  184.98   39.20 
  -3   1  -2  165.48   38.80 
   3   1   2  179.18   38.40 
   4  -1   2   74.09   14.20 
  -4  -1  -2   44.00   12.10 
  -4  -1  -2   66.59   13.60 
   4  -1   2   51.39   12.80 
  -4   1  -2   39.10   12.00 
   4   1   2   44.90   12.60 
   4   1   2   54.39   13.10 
  -5  -1  -2   30.90    9.40 
  -5  -1  -2   41.80   10.70 
   5  -1   2   40.50   10.70 
   5  -1   2   48.30   11.90 
  -5   1  -2   28.30    9.50 
  -5   1  -2   53.19   11.90 
   5   1   2   37.20   10.70 
   5   1   2   26.50   10.50 
   6  -1   2    4.10    5.80 
  -6  -1  -2    2.90    4.30 
  -6  -1  -2    6.10    6.50 
   6  -1   2    8.80    6.70 
  -6   1  -2   12.20    8.30 
  -6   1  -2    6.10    4.50 
   6   1   2    4.30    5.10 
   6   1   2    3.60    6.60 
  -7  -1  -2    9.90    5.70 
  -7  -1  -2   -0.20    4.10 
  -7  -1  -2   -4.00    5.40 
   7  -1   2   -4.70    6.50 
   7  -1   2    0.40    4.80 
  -7   1  -2   -0.30    7.00 
  -7   1  -2   -1.90    2.80 
   7   1   2  -11.80    5.70 
   7   1   2    0.80    4.70 
   8  -1   2   10.10    7.70 
   8  -1   2   23.60    9.70 
  -8  -1  -2   26.00    8.90 
  -8  -1  -2   39.80    8.10 
   8  -1   2   21.40   10.40 
  -8  -1  -2   10.60    7.10 
   8   1   2   11.80    9.10 
  -8   1  -2   21.10    8.50 
   8   1   2   40.60    9.70 
   9  -1   2   10.50    7.70 
   9  -1   2   19.70    9.70 
  -9  -1  -2    5.50    5.90 
   9  -1   2   17.60    9.90 
  -9  -1  -2   18.30    6.80 
  -9  -1  -2    7.10    7.70 
   9   1   2   -1.90    8.60 
  -9   1  -2    8.20    6.10 
  -9   1  -2   16.50    8.10 
   9   1   2   -1.20    7.80 
 -10  -1  -2    5.50    6.60 
  10  -1   2    5.90    7.90 
  10  -1   2    8.20   10.70 
 -10  -1  -2    7.40    5.90 
 -10  -1  -2    1.70    7.40 
  10  -1   2   -1.40    6.90 
  10   1   2   -3.50    8.70 
 -10   1  -2    8.50    8.50 
 -10   1  -2   -2.40    5.00 
  10   1   2    9.10   10.60 
 -11  -1  -2   43.40   12.10 
  11  -1   2   70.79   15.70 
  11  -1   2   16.30   11.70 
  11  -1   2   19.60   12.70 
 -11  -1  -2   37.10   11.90 
  11   1   2   21.10   13.70 
 -11   1  -2   35.00   12.70 
  11   1   2   44.50   14.20 
  12  -1   2   32.70   14.50 
 -12  -1  -2   39.70   11.30 
  12  -1   2   33.30   13.20 
 -12  -1  -2   18.80    9.80 
 -12  -1  -2   32.20   12.30 
  12  -1   2   18.20   10.90 
  12   1   2   23.10   14.10 
  12   1   2    1.50   12.30 
 -12   1  -2   39.40   12.80 
 -12   1  -2   18.20    9.40 
  13  -1   2   -6.50   13.20 
  13  -1   2   -5.30   10.50 
 -13  -1  -2   16.90    8.90 
 -13  -1  -2   11.80   13.10 
  13  -1   2   45.70   15.00 
 -13  -1  -2   26.10   11.70 
  13   1   2    4.80   14.50 
  13   1   2    9.60   11.00 
 -13   1  -2   16.60    8.20 
 -13   1  -2   33.60   13.30 
  14  -1   2   45.10   24.00 
 -14  -1  -2   66.49   23.40 
 -14  -1  -2   99.99   23.00 
  14  -1   2  142.39   30.30 
  14  -1   2  161.18   30.30 
 -14   1  -2   48.80   20.90 
  14   1   2   97.99   25.30 
 -14   1  -2   99.09   23.60 
  14   1   2   50.09   22.70 
  15  -1   2   23.10   15.00 
 -15  -1  -2   21.60   18.10 
 -15  -1  -2   -1.80   15.20 
 -15  -1  -2   17.50   10.60 
  15  -1   2  -20.00   22.10 
  15  -1   2   16.50   14.40 
 -15   1  -2   -1.20   10.40 
  15   1   2    1.80   18.50 
  15   1   2    3.00   20.70 
 -15   1  -2   -2.10   16.70 
  16  -1   2   34.70   16.60 
  16  -1   2  -54.89   25.40 
 -16  -1  -2    4.90   17.00 
 -16  -1  -2    7.10   13.10 
  16  -1   2   21.10   20.60 
  16   1   2    5.20   19.30 
 -16   1  -2   17.50   13.60 
  16  -2  -2  -11.30   28.40 
 -16  -2   2   50.49   28.40 
 -16  -2   2  -30.00   17.00 
  16   2  -2   47.00   23.00 
 -16   2   2   16.40   14.90 
 -15  -2   2  -23.60   12.90 
 -15  -2   2   -5.00   12.60 
 -15  -2   2   27.30   18.60 
  15  -2  -2  -16.10   20.90 
  15  -2  -2   17.10   17.60 
  15   2  -2   28.00   23.80 
 -15   2   2    0.80   14.90 
  15   2  -2    1.40   20.20 
 -15   2   2    2.80   14.00 
  14  -2  -2   35.90   15.60 
  14  -2  -2    2.20   14.50 
 -14  -2   2  -15.00   11.10 
  14  -2  -2   27.00   19.00 
 -14  -2   2    5.60   13.00 
  14   2  -2  -14.40   17.50 
 -14   2   2   -0.70   13.70 
  14   2  -2   -2.50   17.60 
 -14   2   2   18.70   10.80 
 -13  -2   2   -7.00   10.60 
  13  -2  -2   -4.00   15.30 
 -13  -2   2   18.00   13.60 
  13  -2  -2   51.49   15.90 
 -13  -2   2   11.20   10.40 
  13   2  -2    3.20   15.00 
 -13   2   2   11.10   10.60 
 -12  -2   2    6.00    8.80 
  12  -2  -2   14.60   12.30 
 -12  -2   2    2.20   11.60 
  12  -2  -2  -12.20   11.50 
  12  -2  -2   -2.80   10.80 
 -12  -2   2    3.50    9.00 
 -12   2   2    1.60    7.40 
  12   2  -2   17.20   13.10 
 -11  -2   2   -0.10    8.80 
 -11  -2   2   -5.10   10.60 
  11  -2  -2   -3.70   11.80 
  11  -2  -2    4.80    9.00 
 -11  -2   2   12.10    7.70 
  11  -2  -2   10.50   13.20 
  11   2  -2  -11.00    9.50 
 -11   2   2    6.60    6.90 
  10  -2  -2    9.50   11.20 
 -10  -2   2    9.30    8.40 
 -10  -2   2    2.10    6.50 
 -10  -2   2    4.90    7.70 
  10  -2  -2  -23.30   11.60 
  10  -2  -2    0.70    7.20 
 -10   2   2    4.60    8.30 
  10   2  -2    4.60    9.40 
 -10   2   2   -5.10    6.50 
  10   2  -2    1.40    8.00 
   9  -2  -2   22.70   10.70 
   9  -2  -2   28.20   13.40 
  -9  -2   2   40.80   10.50 
  -9  -2   2   36.50   10.60 
   9  -2  -2    8.10   10.00 
   9   2  -2   36.20   16.60 
  -8  -2   2   65.79   15.30 
   8  -2  -2   59.39   16.50 
  -8  -2   2   50.89   15.20 
  -8  -2   2   63.39   15.40 
   8  -2  -2   60.29   16.20 
   8   2  -2   46.10   15.80 
  -8   2   2   67.09   15.60 
   8   2  -2   48.70   16.40 
  -8   2   2   66.99   16.10 
  -7  -2   2   99.49   30.20 
   7  -2  -2  111.59   30.20 
  -7  -2   2  145.29   30.30 
  -7  -2   2  152.58   30.30 
   7  -2  -2  160.28   31.00 
   7  -2  -2  154.08   31.10 
   7   2  -2  146.99   31.30 
  -7   2   2  150.48   30.20 
   7   2  -2  106.99   30.40 
  -6  -2   2 1657.23  354.16 
   6  -2  -2 1590.54  354.06 
   6  -2  -2 1627.34  354.06 
   6  -2  -2 1663.73  354.26 
  -6  -2   2 1619.74  353.86 
  -6  -2   2 1690.03  353.86 
   6   2  -2 1749.92  354.16 
  -6   2   2 1590.34  353.86 
   6   2  -2 1697.43  354.36 
  -6   2   2 1744.43  354.16 
  -5  -2   2   51.89   13.80 
   5  -2  -2   42.80   13.30 
  -5  -2   2   57.69   14.40 
   5  -2  -2   62.69   15.30 
  -5  -2   2   63.89   13.70 
  -5  -2   2   54.69   12.70 
  -5   2   2   58.89   13.70 
   5   2  -2   60.89   13.90 
  -5   2   2   48.80   13.50 
   5   2  -2   73.29   15.40 
   4  -2  -2   95.29   23.40 
  -4  -2   2   99.99   22.10 
  -4  -2   2   86.99   22.70 
  -4  -2   2  112.99   22.20 
   4  -2  -2  112.09   23.10 
  -4  -2   2   80.19   22.20 
   4  -2  -2   98.69   22.30 
   4   2  -2   92.49   22.20 
  -4   2   2  116.39   22.40 
   4   2  -2  124.29   23.40 
  -4   2   2  106.19   22.10 
   4   2  -2   87.09   22.40 
  -3  -2   2  245.48   54.09 
   3  -2  -2  247.38   54.29 
  -3  -2   2  251.57   54.09 
  -3  -2   2  235.48   54.29 
  -3  -2   2  273.47   53.99 
   3  -2  -2  246.88   53.89 
   3  -2  -2  254.37   54.59 
   3  -2  -2  255.57   53.99 
  -3   2   2  246.28   53.89 
   3   2  -2  252.57   54.19 
   3   2  -2  257.27   54.39 
  -2  -2   2  344.67   78.59 
  -2  -2   2  393.56   78.29 
   2  -2  -2  378.56   78.39 
   2  -2  -2  348.57   78.79 
  -2  -2   2  358.96   78.29 
   2   2  -2  370.36   78.59 
   2   2  -2  387.96   78.69 
  -2   2   2  350.66   78.79 
   1  -2  -2  416.66   90.19 
   1  -2  -2  415.26   89.89 
  -1  -2   2  423.66   89.99 
   1   2  -2  444.06   89.99 
  -1   2   2  405.46   90.19 
   0  -2  -2  128.89   27.90 
   0  -2  -2  136.29   28.00 
   0  -2   2  123.79   27.70 
   0   2  -2  122.59   27.70 
   0   2   2  121.69   27.90 
  -1  -2  -2   96.59   21.60 
   1  -2   2   94.59   21.10 
  -1  -2  -2   95.49   21.30 
  -1   2  -2   95.09   21.00 
   1   2   2   94.49   21.20 
   2  -2   2   91.89   24.80 
   2  -2   2  106.79   24.70 
  -2  -2  -2  114.69   25.30 
  -2  -2  -2  129.99   24.80 
  -2  -2  -2  110.89   24.90 
  -2  -2  -2   93.89   24.40 
   2  -2   2  140.99   24.90 
  -2   2  -2  133.09   25.20 
   2   2   2   98.39   24.80 
   2   2   2  127.59   25.00 
  -2   2  -2  115.39   24.70 
  -3  -2  -2   55.89   10.30 
  -3  -2  -2   35.50    9.20 
   3  -2   2   29.90    9.20 
   3  -2   2   33.30    9.90 
  -3  -2  -2   37.40    9.50 
  -3   2  -2   56.29   10.80 
   3   2   2   26.80    9.30 
  -3   2  -2   44.70    9.30 
   3   2   2   53.69   10.60 
  -4  -2  -2   39.70    9.80 
   4  -2   2   43.00   10.70 
  -4  -2  -2   53.99   10.80 
   4   2   2   35.20    9.30 
  -4   2  -2   35.30    9.40 
  -4   2  -2   36.50    9.20 
   4   2   2   61.29   11.60 
   4   2   2   30.60    9.90 
   5  -2   2   20.60    9.10 
  -5  -2  -2   22.90    8.20 
   5  -2   2   35.30    9.90 
  -5  -2  -2   36.30    9.80 
  -5  -2  -2   38.90    9.60 
  -5   2  -2   25.80    8.10 
  -5   2  -2   43.10   10.60 
   5   2   2   26.30    7.70 
   5   2   2   39.30   10.20 
   5   2   2   35.30    9.80 
  -6  -2  -2   18.00    6.50 
   6  -2   2   12.20    7.40 
  -6  -2  -2    3.30    3.90 
  -6  -2  -2    6.20    6.80 
   6  -2   2    4.50   10.20 
   6  -2   2    3.90    5.30 
  -6   2  -2   14.00    7.20 
  -6   2  -2    3.80    4.50 
   6   2   2   -0.30    6.10 
   6   2   2    6.30    6.50 
   7  -2   2    4.70    7.40 
  -7  -2  -2    4.90    4.90 
  -7  -2  -2    1.50    6.90 
   7  -2   2   -3.50    5.00 
  -7  -2  -2   17.20    7.00 
   7  -2   2    3.60   10.10 
  -7   2  -2    8.80    7.50 
   7   2   2    2.30    5.30 
   7   2   2   -0.30    6.30 
  -7   2  -2    1.60    5.00 
   8  -2   2   18.90    8.60 
   8  -2   2   11.80   11.00 
   8  -2   2    9.70    8.50 
  -8  -2  -2    7.00    6.80 
  -8  -2  -2    6.20    5.10 
  -8  -2  -2   18.20    8.40 
  -8   2  -2    9.00    8.50 
  -8   2  -2    4.80    5.50 
   8   2   2   10.40    8.40 
   8   2   2    2.10    7.70 
   9  -2   2   24.60    9.80 
   9  -2   2   10.10    8.30 
  -9  -2  -2   24.90    9.50 
  -9  -2  -2   10.90    6.70 
   9  -2   2   36.20   13.70 
  -9  -2  -2   20.60    8.10 
   9   2   2    7.70    9.40 
  -9   2  -2   15.00    8.30 
   9   2   2   12.70    9.30 
  -9   2  -2   11.10    6.90 
  10  -2   2  258.67   53.79 
 -10  -2  -2  263.17   52.59 
 -10  -2  -2  261.77   52.89 
  10   2   2  227.98   53.49 
 -10   2  -2  272.77   52.99 
  10   2   2  182.48   53.29 
 -10   2  -2  205.28   52.49 
 -11  -2  -2  258.87   47.70 
 -11  -2  -2  251.77   47.90 
 -11  -2  -2  183.78   47.30 
  11  -2   2  250.97   49.30 
  11  -2   2  268.67   48.80 
  11  -2   2  159.88   47.90 
  11   2   2  154.48   48.20 
 -11   2  -2  182.08   47.30 
 -12  -2  -2   26.30   12.50 
 -12  -2  -2   -0.20    9.00 
 -12  -2  -2    6.90    8.00 
  12  -2   2   -3.10   10.00 
  12  -2   2  -15.50   11.70 
 -12   2  -2    4.00    6.80 
  12   2   2    0.70   11.20 
 -13  -2  -2   10.60   11.30 
 -13  -2  -2    4.20    8.40 
 -13  -2  -2   14.30   15.70 
  13  -2   2   30.00   18.80 
  13  -2   2    1.20   12.40 
  13  -2   2   14.60   17.50 
  13   2   2    7.60   13.40 
 -14  -2  -2    8.70   13.20 
 -14  -2  -2   31.40   17.80 
  14  -2   2   19.00   19.00 
  14  -2   2    1.20   18.90 
 -14  -2  -2   12.20   10.60 
  14  -2   2   -0.60   13.00 
 -14   2  -2  -28.90   13.70 
  14   2   2   -1.40   17.50 
  14   2   2   -1.90   18.20 
 -14   2  -2   -1.50    9.50 
  15  -2   2  -14.10   25.10 
 -15  -2  -2   17.50   26.60 
  15  -2   2    9.50   16.00 
 -15  -2  -2  -17.30   15.50 
 -15  -2  -2   15.40   13.90 
  15   2   2  -20.90   17.70 
 -15   2  -2   -4.00   11.00 
  15  -3  -2   74.39   25.60 
  15  -3  -2   79.79   27.50 
 -15  -3   2   23.70   24.70 
 -15   3   2   42.00   18.30 
  15   3  -2  -14.80   25.00 
 -14  -3   2   14.10   20.70 
 -14  -3   2   -9.70   13.60 
  14  -3  -2  -25.60   16.90 
  14  -3  -2   77.39   22.20 
  14  -3  -2   -1.50   22.00 
 -14  -3   2   21.70   12.60 
 -14   3   2   23.70   14.60 
  14   3  -2   -5.80   18.90 
  14   3  -2   48.20   26.50 
 -13  -3   2    0.80   11.00 
  13  -3  -2   16.70   14.10 
 -13  -3   2   -4.90   12.20 
  13  -3  -2   34.10   18.40 
  13  -3  -2   26.90   19.60 
 -13  -3   2   70.29   16.00 
  13   3  -2   26.40   22.10 
  13   3  -2   -6.10   17.70 
 -13   3   2   -7.40   13.50 
 -13   3   2    2.50   11.70 
  12  -3  -2    0.70   10.90 
 -12  -3   2   16.90   10.30 
 -12  -3   2   12.60   10.30 
  12  -3  -2    0.10   15.80 
  12   3  -2   -1.90   18.10 
 -12   3   2   -2.20   11.10 
  12   3  -2   10.20   15.30 
 -12   3   2  -10.90    9.80 
 -11  -3   2   25.50   12.30 
 -11  -3   2   18.20   10.00 
 -11  -3   2  -17.20    8.30 
  11  -3  -2    5.30   13.90 
  11  -3  -2    9.60   10.90 
  11   3  -2    0.00   12.10 
 -11   3   2    8.20    9.50 
 -10  -3   2   76.69   15.40 
 -10  -3   2   26.10   13.90 
  10  -3  -2   86.69   19.20 
  10  -3  -2   55.29   18.10 
 -10  -3   2   68.49   16.60 
  10  -3  -2   44.50   17.10 
  10   3  -2   52.89   17.90 
 -10   3   2   50.79   15.60 
 -10   3   2   57.39   15.20 
  10   3  -2   33.00   17.20 
   9  -3  -2   43.00   18.30 
  -9  -3   2   70.59   17.60 
   9  -3  -2  112.79   21.20 
  -9  -3   2   56.79   17.50 
  -9  -3   2   78.49   18.30 
   9   3  -2   49.10   19.50 
   9   3  -2  107.89   21.30 
  -9   3   2   73.39   17.70 
  -9   3   2   60.29   17.70 
  -8  -3   2   44.10   16.20 
  -8  -3   2   79.29   17.70 
   8  -3  -2   46.40   17.00 
  -8  -3   2   73.79   16.60 
   8  -3  -2   96.29   18.30 
   8   3  -2   68.99   18.40 
  -8   3   2   52.09   16.40 
  -8   3   2   66.99   16.60 
  -7  -3   2   36.10   11.00 
   7  -3  -2   18.60   10.00 
  -7  -3   2   27.60    9.60 
   7  -3  -2   19.90   11.10 
   7  -3  -2   62.79   16.60 
  -7  -3   2   35.30    9.50 
   7   3  -2   33.40   12.20 
   7   3  -2   33.80   10.80 
  -7   3   2   38.40    9.80 
  -7   3   2   20.40    9.10 
  -6  -3   2   -0.40    4.70 
  -6  -3   2    2.10    5.20 
  -6  -3   2   -2.90    5.00 
   6  -3  -2    2.70    7.00 
  -6  -3   2   10.10    7.70 
   6  -3  -2   -0.10    5.40 
   6  -3  -2   14.70   12.50 
   6   3  -2    2.20    7.80 
   6   3  -2    5.10    6.30 
  -6   3   2    3.00    4.50 
  -6   3   2   16.20    5.80 
  -5  -3   2   63.79   13.00 
  -5  -3   2   49.90   13.00 
  -5  -3   2   40.40   12.90 
   5  -3  -2   66.89   16.70 
  -5  -3   2   64.39   14.80 
   5  -3  -2   44.70   13.30 
   5  -3  -2   80.59   14.90 
   5  -3  -2   47.10   12.70 
  -5   3   2   48.50   12.90 
   5   3  -2   55.09   13.60 
  -4  -3   2   35.50    9.40 
   4  -3  -2   33.90   12.10 
  -4  -3   2   26.50    9.30 
   4  -3  -2   32.80    8.20 
  -4  -3   2   24.40    6.90 
  -4  -3   2   15.00    6.40 
  -4   3   2   25.40    6.70 
   4   3  -2   28.10    9.00 
   4   3  -2    9.90   10.70 
  -3  -3   2   -0.20    6.70 
   3  -3  -2   15.30    5.90 
  -3  -3   2    8.70    7.70 
   3  -3  -2   10.90   10.10 
   3   3  -2    8.50    5.30 
  -2  -3   2   58.59   14.90 
   2  -3  -2   45.80   13.70 
   2  -3  -2   79.69   17.60 
  -1  -3   2   96.89   22.00 
  -1  -3   2  106.49   22.40 
   1  -3  -2   95.69   21.60 
   1  -3  -2  107.59   22.40 
   1   3  -2   75.39   21.50 
   0  -3  -2   95.09   24.20 
   0  -3  -2  128.39   24.70 
   0  -3   2   95.19   24.00 
   0  -3   2  130.39   25.00 
   0   3  -2   91.29   23.70 
   1  -3   2  123.19   27.70 
  -1  -3  -2  122.99   28.30 
  -1  -3  -2  129.89   28.20 
   1  -3   2  126.79   28.80 
  -1   3  -2  124.69   27.70 
   2  -3   2  121.69   24.30 
  -2  -3  -2  110.29   24.70 
   2  -3   2  121.19   26.00 
  -2  -3  -2  102.89   25.20 
  -2   3  -2   92.29   24.60 
  -3  -3  -2   49.70   11.10 
   3  -3   2   38.20    9.60 
  -3  -3  -2   33.10   11.30 
   3  -3   2   43.80   13.70 
   3   3   2   30.20   10.40 
  -3   3  -2   24.60    9.50 
  -3   3  -2   30.80    8.70 
   3   3   2   35.60    9.70 
  -3   3  -2   50.59    9.90 
   4  -3   2   15.90   11.60 
  -4  -3  -2   20.20    6.10 
   4  -3   2   16.50    6.00 
  -4  -3  -2   29.10    9.70 
  -4  -3  -2   26.60    7.20 
   4  -3   2   12.10    6.70 
   4  -3   2    4.00    5.50 
   4   3   2   11.50    6.80 
   4   3   2   16.90    7.40 
  -4   3  -2   12.40    5.80 
  -4   3  -2   19.00    7.10 
  -4   3  -2   34.30    7.40 
   5  -3   2   37.20   13.20 
  -5  -3  -2    8.60    5.70 
  -5  -3  -2   23.10    6.50 
  -5  -3  -2   30.30    9.90 
  -5  -3  -2   15.00    6.70 
   5  -3   2   13.10    7.40 
   5  -3   2   39.50    8.30 
   5   3   2    6.70    6.70 
   5   3   2   25.70    8.20 
  -5   3  -2   18.20    7.20 
  -5   3  -2   17.30    5.80 
   6  -3   2  103.79   23.70 
  -6  -3  -2   75.59   21.80 
   6  -3   2  123.39   23.20 
  -6  -3  -2  116.59   22.40 
  -6   3  -2   80.39   21.60 
  -6   3  -2  113.19   22.70 
   6   3   2   77.99   23.10 
   6   3   2  108.99   23.50 
  -7  -3  -2  260.37   67.39 
  -7  -3  -2  353.36   68.09 
  -7  -3  -2  361.96   67.79 
   7  -3   2  348.47   68.19 
   7   3   2  324.37   68.49 
   7   3   2  257.37   68.19 
  -7   3  -2  347.67   67.89 
  -7   3  -2  268.67   67.39 
  -8  -3  -2   26.30    8.50 
   8  -3   2    0.60    8.50 
   8  -3   2   34.30   15.20 
   8  -3   2   -4.60    9.40 
  -8  -3  -2   13.30    9.30 
  -8  -3  -2   10.80    6.20 
  -8   3  -2    5.80    6.40 
   8   3   2    0.20    9.30 
  -8   3  -2   17.70    8.50 
   8   3   2   19.20    9.70 
  -9  -3  -2   12.90    7.30 
   9  -3   2   31.70   11.30 
  -9  -3  -2    6.70   10.40 
  -9  -3  -2   14.40    9.10 
   9  -3   2   26.50   19.80 
   9  -3   2   -3.80    8.90 
   9   3   2    5.00   10.00 
  -9   3  -2   17.90    9.70 
  -9   3  -2   17.80    7.60 
   9   3   2    4.30   10.90 
 -10  -3  -2    0.10   12.00 
  10  -3   2   58.89   19.80 
  10  -3   2   17.70   12.60 
 -10  -3  -2   23.90   11.00 
  10  -3   2    9.30   10.60 
 -10  -3  -2   12.70    8.20 
  10   3   2    9.20   14.90 
  10   3   2    5.40   12.80 
 -10   3  -2   25.50   10.30 
 -10   3  -2   14.70    8.70 
  11  -3   2    0.60   11.30 
  11  -3   2   -4.50   14.10 
 -11  -3  -2   -0.70    7.40 
 -11  -3  -2   17.00   11.10 
  11   3   2  -12.10   13.10 
 -11   3  -2   12.00    7.90 
 -11   3  -2    5.00   11.20 
  11   3   2   12.30   14.90 
  12  -3   2    2.80   16.60 
 -12  -3  -2   -2.10    8.20 
 -12  -3  -2    1.00   11.30 
  12  -3   2    8.90   13.20 
  12  -3   2   17.70   21.10 
 -12   3  -2    2.20   12.60 
  12   3   2   18.00   17.60 
 -12   3  -2   -1.80    9.20 
  12   3   2    6.90   15.30 
 -13  -3  -2   55.99   20.10 
 -13  -3  -2  -16.20   14.50 
  13  -3   2  -36.60   17.50 
  13  -3   2    2.70   15.60 
 -13  -3  -2   12.00   10.30 
 -13   3  -2   28.40   15.90 
 -13   3  -2    2.60   11.20 
  13   3   2   -9.20   16.80 
  13   3   2    7.80   19.00 
  14  -3   2    1.80   27.30 
  14  -3   2    3.60   21.80 
 -14  -3  -2   66.29   23.70 
  14  -3   2   28.20   18.40 
 -14  -3  -2  -10.10   11.40 
 -14  -3  -2    5.50   15.60 
  14   3   2    6.60   21.00 
 -14   3  -2    4.20   11.60 
  13  -4  -2   -0.80   17.40 
 -13  -4   2   10.40   12.80 
 -13  -4   2    3.90   16.00 
  13  -4  -2   21.30   27.80 
 -13   4   2   18.10   13.00 
  13   4  -2  -24.90   21.90 
  12  -4  -2    0.20   15.20 
  12  -4  -2   -6.90   20.70 
 -12  -4   2   -1.20   11.60 
 -12  -4   2   17.10   16.40 
 -12  -4   2    4.20   12.80 
 -12   4   2  -33.90   13.10 
  12   4  -2    9.60   23.80 
  12   4  -2    7.00   18.70 
 -12   4   2   38.10   11.50 
 -11  -4   2    9.60   12.00 
  11  -4  -2   -4.40   14.90 
  11  -4  -2  100.89   23.90 
 -11  -4   2   75.09   16.80 
  11  -4  -2   43.20   21.10 
 -11  -4   2   37.70   13.70 
 -11   4   2   13.90   12.70 
  11   4  -2   63.49   22.50 
 -11   4   2   16.70   12.00 
  10  -4  -2    1.90   11.70 
 -10  -4   2   39.90   13.50 
 -10  -4   2    6.00    9.40 
  10  -4  -2   28.50   16.50 
 -10  -4   2   13.30    9.40 
 -10   4   2    7.60    9.10 
  10   4  -2  -10.10   14.40 
  10   4  -2   16.30   17.20 
  -9  -4   2    6.90    8.50 
   9  -4  -2   26.70   14.70 
   9  -4  -2    4.70    9.80 
  -9  -4   2    5.40    8.00 
  -9  -4   2   17.20   10.10 
  -9   4   2    9.60    8.10 
   9   4  -2  -25.30   18.70 
   9   4  -2    5.50   12.30 
  -8  -4   2    4.30    7.80 
  -8  -4   2    4.10    7.10 
   8  -4  -2   26.20   12.50 
  -8   4   2    9.40    6.50 
   8   4  -2   17.00   13.70 
   8   4  -2   -2.70   11.60 
  -8   4   2  -11.10    7.30 
  -7  -4   2   20.70    7.30 
   7  -4  -2    5.10    8.30 
  -7  -4   2   17.40    7.90 
  -7  -4   2   22.50    7.50 
   7   4  -2   -1.50    9.20 
  -7   4   2   20.60    6.10 
  -7   4   2   -1.00    7.30 
   7   4  -2   32.90   13.40 
  -6  -4   2    9.70    8.40 
  -6  -4   2    6.00    4.80 
   6  -4  -2    6.60    6.70 
   6   4  -2    2.60   11.40 
   6   4  -2    1.40    7.50 
  -6   4   2    4.90    5.70 
   5  -4  -2  -21.70   13.70 
   5  -4  -2   -5.90    6.80 
  -5  -4   2   -8.90    8.50 
   5   4  -2  -20.00    9.50 
   4  -4  -2    5.10    7.50 
  -4  -4   2    7.00   10.60 
   4  -4  -2   -3.50   13.30 
  -4  -4   2  -10.00    8.70 
   3  -4  -2   15.20   14.20 
   3  -4  -2   23.70    8.70 
  -3  -4   2   -1.10   10.90 
  -3  -4   2   20.70    9.40 
  -2  -4   2    7.10   10.50 
   2  -4  -2   -2.60    8.00 
  -2  -4   2   -3.10    7.50 
   2  -4  -2  -10.70   11.10 
   1  -4  -2    8.80   11.70 
   1  -4  -2   -2.30    7.30 
  -1  -4   2   10.80   11.40 
  -1  -4   2  -14.90    8.00 
   0  -4  -2   12.40    9.90 
   0  -4  -2   -5.60    7.80 
   0  -4   2   35.70   12.20 
   0  -4   2   -7.10    7.00 
   1  -4   2   12.70    8.00 
  -1  -4  -2   13.10   10.50 
  -1  -4  -2   31.00   11.90 
   1  -4   2   26.20   24.30 
   2  -4   2   88.69   22.20 
  -2  -4  -2   63.39   18.70 
   2  -4   2   77.49   17.90 
  -2  -4  -2   63.49   18.40 
  -3  -4  -2   70.69   17.10 
   3  -4   2   89.79   22.20 
  -3  -4  -2   42.50   16.30 
   3  -4   2   53.29   15.30 
  -4  -4  -2   42.40   13.20 
   4  -4   2   38.50   11.90 
   4  -4   2   66.59   20.10 
  -4  -4  -2   39.70   14.00 
   5  -4   2   76.09   20.90 
   5  -4   2   46.40   12.10 
  -5  -4  -2   40.30   12.50 
   5   4   2   41.00   14.00 
  -5   4  -2   44.70   12.00 
  -6  -4  -2   25.10    8.90 
   6  -4   2   15.30   11.80 
  -6   4  -2   49.10   10.70 
  -6   4  -2   51.19   11.60 
  -7  -4  -2   -1.60    6.50 
   7  -4   2    6.70    8.80 
  -7  -4  -2   10.00    5.60 
   7   4   2    9.90   10.00 
  -7   4  -2   12.90    6.30 
   7   4   2   17.50   11.50 
  -7   4  -2   -2.90    8.00 
  -8  -4  -2   -1.20    7.40 
  -8  -4  -2   34.20   13.40 
  -8  -4  -2   10.70    6.60 
   8  -4   2    7.60   10.80 
   8  -4   2   -4.70   10.70 
  -8   4  -2    2.90    7.10 
  -8   4  -2    4.30    8.10 
   8   4   2    8.90   12.70 
   8   4   2  -21.30   10.70 
  -9  -4  -2   31.90   13.60 
   9  -4   2   56.49   23.10 
   9  -4   2   19.30   12.50 
  -9  -4  -2   -8.10    9.00 
  -9  -4  -2    6.90    7.40 
   9  -4   2    3.20   13.00 
  -9   4  -2   11.90    9.30 
   9   4   2  -19.00   12.50 
  10  -4   2   -9.20   14.00 
  10  -4   2    9.30   15.00 
 -10  -4  -2    7.00    8.60 
  10  -4   2   47.70   25.30 
 -10  -4  -2  -12.90   15.10 
 -10  -4  -2   23.00   11.20 
  10   4   2   -7.10   17.00 
  10   4   2    5.60   14.70 
 -10   4  -2   25.40   10.90 
 -10   4  -2  -14.90   11.40 
 -11  -4  -2   13.80   10.10 
  11  -4   2   18.80   17.10 
 -11  -4  -2    5.20   18.30 
  11  -4   2   52.49   29.60 
  11  -4   2   -5.60   16.10 
 -11  -4  -2   -2.80   11.70 
 -11   4  -2   12.90   14.00 
  11   4   2    4.60   16.80 
  11   4   2    9.70   20.00 
 -11   4  -2    9.60   11.80 
  12  -4   2  -16.30   20.50 
 -12  -4  -2   -1.50   13.40 
  12  -4   2   12.90   18.00 
 -12  -4  -2   10.80   12.00 
  12  -4   2  114.29   50.09 
 -12  -4  -2   50.19   23.10 
 -12   4  -2   14.10   12.50 
 -12   4  -2  -13.80   16.30 
  12   4   2  -12.00   19.50 
  12   4   2    0.30   24.40 
 -10  -5   2   -1.80   10.70 
 -10   5   2   -0.40   12.50 
   9   5  -2   -7.10   15.10 
   8  -5  -2   82.19   25.60 
  -8  -5   2   20.70   16.30 
   7  -5  -2   52.99   22.90 
   7  -5  -2  -11.60    9.00 
  -7  -5   2    0.00   12.00 
  -7  -5   2    8.80    8.90 
   6  -5  -2   67.09   22.30 
  -6  -5   2   20.70   13.40 
  -6  -5   2   27.10   12.60 
   5  -5  -2   39.50   19.40 
  -5  -5   2    6.40   12.20 
  -5  -5   2    7.80   12.00 
   5  -5  -2    5.70   13.50 
   4  -5  -2   42.10   18.40 
  -4  -5   2   12.30   11.40 
   4  -5  -2   13.70   10.70 
  -4  -5   2   21.60   21.20 
  -3  -5   2   -6.20   12.70 
   3  -5  -2   11.60   10.30 
   3  -5  -2   14.30   17.10 
  -3  -5   2    6.90   10.90 
   2  -5  -2    4.90   10.50 
  -2  -5   2    8.90    9.90 
  -2  -5   2   11.70   14.20 
   2  -5  -2  -11.40   14.40 
   1  -5  -2   14.90   14.20 
   1  -5  -2  -18.30   10.50 
  -1  -5   2    0.20    9.80 
  -1  -5   2   24.40   15.80 
   0  -5  -2   -6.80   12.10 
   0  -5   2   14.70   10.80 
   0  -5   2   52.49   16.80 
   0  -5  -2   18.10   13.90 
  -1  -5  -2   25.80   12.30 
   1  -5   2   -9.40    9.30 
  -1  -5  -2    5.70   13.20 
   1  -5   2   31.40   18.00 
   2  -5   2   61.09   22.80 
  -2  -5  -2   54.39   19.00 
  -2  -5  -2   66.09   19.30 
  -3  -5  -2   15.00   13.30 
   3  -5   2   55.59   22.00 
   3  -5   2    7.70   10.10 
  -3  -5  -2   18.90   12.40 
   4  -5   2   -2.10    9.30 
   4  -5   2   48.50   23.60 
  -4  -5  -2   23.50   15.40 
  -5  -5  -2   19.10   11.00 
  -5  -5  -2   33.80   16.80 
   5  -5   2   42.40   25.10 
   6  -5   2   45.10   27.60 
  -6  -5  -2   45.00   17.90 
  -7  -5  -2  -11.90   16.90 
   7  -5   2   70.99   28.30 
  -9  -5  -2    4.40    8.50 
  -9   5  -2   14.70   12.40 
   9   5   2  -11.50   21.40 
   4  -6  -2   -5.80   16.80 
  -4  -6   2   48.40   19.60 
  -3  -6   2   48.10   23.10 
   3  -6  -2   47.30   31.90 
   3  -6  -2   54.99   20.10 
   2  -6  -2   20.70   24.30 
  -2  -6   2   21.30   17.00 
  -2  -6   2   61.79   21.70 
   2  -6  -2   10.00   17.90 
  -1  -6   2   66.89   27.70 
   1  -6  -2   93.99   31.30 
   0  -6   2   30.60   23.20 
   0  -6  -2   75.79   26.70 
   0  -6   2  112.59   27.90 
   1  -6   2   11.30   17.10 
  -1  -6  -2   51.49   21.80 
   1  -6   2   62.49   29.40 
  -1  -6  -2   30.30   20.00 
  -2  -6  -2   31.40   21.70 
   2  -6   2  -21.00   14.30 
  -2  -6  -2   17.10   18.20 
   2  -6   2   28.70   27.20 
  -3  -6  -2   48.50   19.40 
   3  -6   2   23.60   17.20 
  -4  -6  -2   12.30   15.90 
   4  -6   2  -35.60   14.20 
 -17   0   3   -1.30   18.60 
  17   0  -3    2.10   30.50 
  17   0  -3  -18.60   21.00 
 -16   0   3   39.60   17.10 
  16   0  -3   -5.50   17.50 
 -16   0   3  -15.80   15.20 
  16   0  -3   -2.10   21.70 
  15   0  -3  -12.60   15.30 
  15   0  -3   49.10   20.60 
 -15   0   3   14.30   12.90 
 -15   0   3   -1.00   12.70 
  14   0  -3   11.90   13.60 
 -14   0   3   13.10   10.70 
 -14   0   3    5.30   10.10 
  14   0  -3   -9.80   13.40 
  13   0  -3   10.20    6.90 
  13   0  -3    5.10    9.70 
  13   0  -3    6.20   12.40 
 -13   0   3   -4.00    8.40 
 -12   0   3  -10.70    7.60 
  12   0  -3   -8.20    7.60 
  12   0  -3    4.30    6.00 
  12   0  -3   -1.40   13.80 
  11   0  -3    0.00    5.80 
 -11   0   3    5.50    6.30 
  11   0  -3   -3.90    9.10 
  11   0  -3    4.10    8.20 
 -11   0   3    9.00   15.10 
 -10   0   3   17.50    7.80 
  10   0  -3   -3.30    5.40 
  10   0  -3    3.50   10.40 
  10   0  -3    3.70    6.10 
 -10   0   3    9.70    6.00 
  -9   0   3   24.10    7.40 
   9   0  -3   10.40    6.70 
   9   0  -3    2.50    5.80 
  -9   0   3    5.50    6.70 
   9   0  -3   19.60    8.70 
   8   0  -3    1.30    5.00 
  -8   0   3   12.50    7.20 
  -8   0   3    2.40    5.70 
   8   0  -3   13.10    6.00 
   8   0  -3   23.40    9.30 
  -7   0   3    4.70    5.10 
   7   0  -3    3.10    6.10 
   7   0  -3   -5.70    7.30 
  -7   0   3    1.00    5.20 
   7   0  -3    3.30    5.40 
  -6   0   3   -3.90    4.00 
   6   0  -3   -2.80    6.50 
   6   0  -3    2.30    2.70 
  -6   0   3   -0.40    5.50 
  -6   0   3   -2.60    4.50 
   6   0  -3    4.80    4.40 
   6   0  -3    1.00    5.10 
  -5   0   3    1.20    3.00 
  -5   0   3    4.80    4.00 
   5   0  -3    2.30    6.50 
   5   0  -3   -2.10    4.90 
  -5   0   3   -0.30    4.30 
   5   0  -3    1.30    4.60 
  -5   0   3    1.60    5.20 
  -4   0   3   -4.80    3.70 
  -4   0   3   -1.30    5.50 
   4   0  -3  -11.30    6.60 
   4   0  -3   -0.20    4.50 
   4   0  -3    0.40    3.90 
   4   0  -3   -3.60    2.80 
  -4   0   3    0.90    5.80 
  -3   0   3    8.00    4.90 
   3   0  -3    7.20    4.50 
   3   0  -3    2.50    7.90 
  -3   0   3   12.40    4.40 
   3   0  -3    1.90    3.40 
  -3   0   3    7.10    6.10 
   2   0  -3    0.10    3.10 
   2   0  -3    3.10    6.00 
  -2   0   3    3.80    4.20 
  -2   0   3    3.10    3.50 
   1   0  -3    0.70    2.20 
  -1   0   3   -1.80    3.20 
   1   0  -3   -2.90    4.60 
  -1   0   3   -1.40    2.50 
   0   0   3    3.10    3.70 
   0   0  -3    8.80    3.20 
   0   0  -3    9.40    5.70 
   1   0   3   11.90    4.80 
  -1   0  -3    7.10    3.60 
  -1   0  -3   12.50    6.20 
   1   0   3   11.70    4.20 
  -2   0  -3    0.80    6.50 
   2   0   3    3.40    5.00 
   2   0   3    2.90    4.80 
  -2   0  -3    4.20    3.50 
  -3   0  -3   -1.70    3.80 
   3   0   3    1.60    4.60 
   3   0   3   -3.00    4.50 
  -3   0  -3    9.70    7.50 
  -4   0  -3    0.60    3.90 
   4   0   3    1.50    5.70 
   4   0   3    2.40    5.60 
  -4   0  -3    6.00    8.00 
  -5   0  -3    4.20    4.30 
   5   0   3    7.60    5.70 
   5   0   3   -4.10    6.30 
  -5   0  -3   11.20    7.10 
   6   0   3    3.10    6.50 
   6   0   3    3.80    5.30 
  -6   0  -3    4.50    6.70 
  -6   0  -3   -1.70    3.30 
  -7   0  -3   -0.90    4.20 
  -7   0  -3    6.80    7.40 
   7   0   3   -4.90    5.00 
   7   0   3   -6.80    6.20 
   8   0   3    2.10    6.30 
   8   0   3    3.90    7.30 
  -8   0  -3  -10.10    6.70 
  -8   0  -3    3.20    5.20 
  -9   0  -3    6.80    9.00 
   9   0   3   -0.10    8.80 
   9   0   3    0.90    6.00 
  -9   0  -3    2.90    4.40 
 -10   0  -3    6.90    9.80 
  10   0   3    4.70    8.10 
  10   0   3   -9.40    9.10 
 -10   0  -3    1.10    4.60 
  10   0   3   -1.20    6.20 
 -10   0  -3    7.70    5.50 
 -11   0  -3   16.70    9.90 
  11   0   3   24.20    9.60 
 -11   0  -3    2.10    7.10 
  11   0   3    8.90   10.00 
  11   0   3    6.80    9.70 
 -12   0  -3   15.70   10.60 
 -12   0  -3    0.20    6.00 
  12   0   3   12.40    9.70 
  12   0   3   11.70   12.30 
  12   0   3    3.80    9.60 
  13   0   3   18.10   10.30 
  13   0   3    6.00   13.60 
 -13   0  -3   -0.60    7.60 
  13   0   3    1.70   10.20 
 -13   0  -3   11.90   11.00 
 -14   0  -3   -3.10   12.10 
 -14   0  -3   -1.20    8.30 
  14   0   3    4.80   16.40 
  14   0   3   14.70   10.40 
  14   0   3   -3.90   13.50 
 -15   0  -3   12.80   12.90 
  15   0   3    8.40   21.80 
 -15   0  -3  -17.30   15.50 
  15   0   3   11.00   17.70 
  15   0   3   41.70   12.10 
 -16   0  -3   13.10   19.10 
  16   0   3   32.20   12.70 
 -16   0  -3   13.90   12.00 
  16   0   3   22.90   26.10 
  16   0   3   -6.40   17.40 
 -17  -1   3   -2.40   17.80 
  17  -1  -3   63.09   28.00 
 -17   1   3   12.70   16.90 
  17   1  -3  -10.00   21.90 
  16  -1  -3   21.10   25.60 
  16  -1  -3    6.50   20.10 
  16  -1  -3  -14.70   11.90 
 -16  -1   3  -18.30   13.50 
 -16  -1   3   -5.10   14.10 
 -16   1   3  -15.90   15.00 
 -16   1   3   11.60   18.10 
  16   1  -3   25.70   19.00 
  16   1  -3   36.30   23.10 
 -15  -1   3  -14.80   12.40 
  15  -1  -3   14.90   16.20 
  15  -1  -3   16.30   17.60 
 -15  -1   3  -11.10   11.70 
  15  -1  -3    4.20   15.40 
 -15   1   3   -4.80   12.80 
  15   1  -3   12.10   15.20 
  15   1  -3  -14.30   17.50 
 -15   1   3   -4.70   12.50 
  14  -1  -3    6.70    9.90 
  14  -1  -3   -3.70   12.70 
 -14  -1   3   13.30   11.60 
 -14  -1   3   -1.40   11.30 
 -14  -1   3  -16.60    9.90 
  14  -1  -3    1.40   14.20 
  14   1  -3    1.70   16.10 
  14   1  -3   -0.50   12.60 
 -14   1   3   -1.40   10.50 
 -13  -1   3    1.30   10.00 
 -13  -1   3   -9.60    8.00 
  13  -1  -3   19.00   10.10 
  13  -1  -3    8.00   11.00 
  13  -1  -3   -2.70   13.20 
 -13  -1   3  -14.40    9.40 
 -13   1   3    9.10    8.80 
  13   1  -3   -1.60   12.40 
 -13   1   3   -9.40    9.70 
  13   1  -3    2.60   12.70 
  12  -1  -3   13.00   10.00 
 -12  -1   3    1.90    9.40 
  12  -1  -3   21.40   13.40 
  12  -1  -3   12.30   11.00 
 -12  -1   3    6.00    6.90 
 -12  -1   3   19.90   11.50 
  12   1  -3    0.80    9.50 
  12   1  -3   21.80   12.50 
 -12   1   3    8.90    7.40 
 -12   1   3   11.00    9.00 
 -11  -1   3   27.20    8.90 
  11  -1  -3   -7.90   10.00 
  11  -1  -3   12.70    9.50 
  11  -1  -3   25.20   10.40 
 -11  -1   3   -7.70   14.50 
 -11  -1   3    6.10    8.30 
 -11   1   3   10.50    9.00 
  11   1  -3   12.60   10.90 
 -11   1   3   19.10    8.90 
  11   1  -3   -1.60    8.30 
 -10  -1   3    4.60    7.80 
 -10  -1   3   -1.40    6.00 
  10  -1  -3   -3.80    8.00 
  10  -1  -3    3.70    8.00 
  10  -1  -3    2.90    7.20 
 -10  -1   3   -8.90    6.20 
 -10   1   3   -1.30    5.80 
  10   1  -3   -0.90    8.60 
 -10   1   3    2.20    6.90 
  10   1  -3    2.50    6.50 
   9  -1  -3   30.10   11.40 
  -9  -1   3   42.00    9.40 
  -9  -1   3   48.60   10.30 
  -9  -1   3   20.70    9.10 
   9  -1  -3   17.60    8.90 
  -9   1   3   28.70    9.00 
   9   1  -3   32.80   12.00 
  -9   1   3   18.30    9.40 
   8  -1  -3   -9.40    7.00 
  -8  -1   3    4.90    5.80 
  -8  -1   3    2.20    5.20 
  -8  -1   3    8.70    6.50 
   8  -1  -3    1.20    4.10 
   8  -1  -3   -2.70    7.10 
  -8   1   3    4.00    5.40 
   8   1  -3    2.70    4.80 
   8   1  -3   -3.50    7.80 
   7  -1  -3    9.60    7.50 
  -7  -1   3   -6.20    5.00 
   7  -1  -3    3.00    5.20 
  -7  -1   3   -1.70    5.50 
   7  -1  -3   -0.20    7.30 
  -7  -1   3    1.80    4.10 
  -7   1   3   -1.90    4.60 
  -7   1   3    4.70    5.90 
   7   1  -3    3.80    5.80 
   7   1  -3   -4.70    7.20 
   6  -1  -3  549.95  127.59 
  -6  -1   3  612.14  127.89 
  -6  -1   3  614.64  127.59 
  -6  -1   3  589.34  127.29 
   6  -1  -3  591.04  127.49 
   6  -1  -3  639.64  128.09 
  -6   1   3  590.04  127.49 
   6   1  -3  618.24  128.09 
  -6   1   3  600.44  127.79 
   6   1  -3  603.24  127.29 
   6   1  -3  600.94  127.59 
  -6   1   3  560.94  127.49 
   5  -1  -3  194.68   42.40 
   5  -1  -3  179.88   42.20 
   5  -1  -3  208.88   43.10 
  -5  -1   3  173.08   42.50 
  -5  -1   3  197.08   42.10 
  -5  -1   3  203.68   42.40 
   5   1  -3  189.18   42.00 
  -5   1   3  190.28   42.50 
   5   1  -3  223.28   43.20 
  -5   1   3  199.08   42.40 
  -5   1   3  191.88   42.30 
   5   1  -3  202.08   42.40 
   4  -1  -3  412.26   90.29 
  -4  -1   3  413.56   90.09 
   4  -1  -3  442.46   90.69 
  -4  -1   3  423.06   90.19 
   4  -1  -3  426.46   90.19 
  -4  -1   3  414.26   90.39 
  -4   1   3  417.66   90.19 
   4   1  -3  452.55   90.69 
  -4   1   3  419.16   90.29 
   4   1  -3  429.86   90.09 
  -4   1   3  414.76   90.39 
   4   1  -3  403.56   90.19 
  -3  -1   3  167.88   40.20 
   3  -1  -3  180.78   40.10 
  -3  -1   3  185.68   40.60 
  -3  -1   3  189.78   40.30 
   3  -1  -3  207.98   40.50 
   3  -1  -3  182.48   41.00 
   3   1  -3  181.48   40.20 
  -3   1   3  216.78   40.50 
   3   1  -3  178.68   40.20 
   3   1  -3  181.18   41.00 
  -3   1   3  185.48   40.20 
  -3   1   3  170.28   40.40 
   2  -1  -3  119.29   27.60 
  -2  -1   3  141.49   27.40 
  -2  -1   3  123.89   27.60 
   2  -1  -3  116.49   27.20 
   2  -1  -3  115.09   28.20 
  -2  -1   3  120.39   27.50 
   2   1  -3  120.79   27.10 
  -2   1   3  124.79   27.30 
  -2   1   3  130.69   27.70 
   2   1  -3  129.69   27.40 
   2   1  -3  144.39   28.40 
  -1  -1   3  167.78   34.70 
   1  -1  -3  162.68   34.80 
  -1  -1   3  170.58   34.20 
   1  -1  -3  142.49   34.10 
  -1  -1   3  166.38   34.40 
   1  -1  -3  147.99   34.50 
  -1   1   3  138.59   34.10 
   1   1  -3  178.48   35.10 
  -1   1   3  160.78   34.50 
   1   1  -3  172.28   34.40 
   0  -1  -3  451.65   97.79 
   0  -1  -3  443.26   97.89 
   0  -1   3  472.45   97.99 
   0  -1   3  471.65   97.69 
   0  -1   3  482.25   97.69 
   0   1   3  423.36   97.59 
   0   1  -3  465.95   97.79 
   0   1   3  444.26   97.79 
   0   1  -3  474.65   97.99 
  -1  -1  -3   92.19   21.30 
   1  -1   3  112.09   21.70 
   1  -1   3   94.19   22.00 
  -1  -1  -3  104.59   22.00 
   1   1   3   94.39   21.50 
   1   1   3   89.19   21.60 
  -1   1  -3  112.89   22.50 
  -1   1  -3   94.79   21.40 
   2  -1   3  334.97   63.69 
  -2  -1  -3  319.67   63.79 
   2  -1   3  286.97   63.79 
  -2  -1  -3  271.07   63.39 
   2   1   3  282.07   63.59 
  -2   1  -3  321.77   63.89 
   2   1   3  304.87   63.59 
  -2   1  -3  298.07   63.39 
  -2   1  -3  275.67   63.19 
   2   1   3  284.47   63.29 
   3  -1   3   85.09   16.70 
   3  -1   3   75.39   16.70 
  -3  -1  -3   59.69   16.00 
  -3  -1  -3   81.19   17.20 
  -3   1  -3   71.29   16.00 
  -3   1  -3   78.49   17.50 
   3   1   3   63.99   16.50 
   3   1   3   62.09   16.50 
  -4  -1  -3    0.80    3.10 
   4  -1   3   -1.50    3.20 
   4  -1   3    7.70    5.30 
  -4  -1  -3    8.80    6.10 
  -4   1  -3    1.20    3.90 
   4   1   3    3.30    4.90 
   4   1   3    6.70    5.70 
  -4   1  -3   -5.30    6.60 
   5  -1   3   48.40   12.90 
   5  -1   3   38.40   11.60 
  -5  -1  -3   57.69   12.80 
  -5  -1  -3   32.40   10.50 
  -5   1  -3   37.10   10.60 
   5   1   3   64.69   13.30 
  -5   1  -3   54.09   12.90 
   5   1   3   35.30   11.10 
  -6  -1  -3    0.60    3.80 
  -6  -1  -3   11.10    7.10 
   6  -1   3    7.70    7.00 
   6  -1   3    8.00    7.00 
  -6   1  -3    0.10    4.00 
  -6   1  -3    1.70    7.00 
   6   1   3    3.10    5.20 
   6   1   3   11.00    6.90 
  -7  -1  -3    0.60    4.30 
   7  -1   3   -0.80    7.30 
  -7  -1  -3    5.90    6.60 
   7  -1   3    8.30    6.80 
  -7   1  -3    0.30    3.50 
  -7   1  -3   -0.60    5.70 
   7   1   3    4.80    7.30 
   7   1   3    0.80    5.00 
   8  -1   3   21.10    9.20 
   8  -1   3    8.40    6.70 
  -8  -1  -3   10.00    5.40 
  -8  -1  -3    7.80    7.90 
   8   1   3    8.30    7.50 
  -8   1  -3   10.70    7.80 
  -8   1  -3    7.20    6.20 
  -9  -1  -3   -2.00    4.70 
   9  -1   3   39.90   11.80 
  -9  -1  -3    8.50    7.20 
   9  -1   3    5.00   10.00 
   9  -1   3   -4.80    6.80 
  -9  -1  -3    5.10    6.60 
  -9   1  -3    0.60    5.10 
   9   1   3   -2.50    8.10 
   9   1   3    2.40    6.70 
  -9   1  -3    7.30    8.60 
  10  -1   3   -0.80    7.60 
 -10  -1  -3    5.50    7.20 
 -10  -1  -3    2.10    7.60 
  10  -1   3   28.50   11.60 
 -10  -1  -3   10.40    8.80 
  10  -1   3   12.40   10.70 
  10   1   3   -0.70    8.30 
  10   1   3   13.00    9.30 
 -10   1  -3   15.90    7.70 
 -10   1  -3   19.80    9.60 
 -11  -1  -3   41.60   11.90 
  11  -1   3   67.29   14.90 
  11  -1   3   36.30   14.50 
 -11   1  -3   21.70   11.20 
  11   1   3   65.19   16.60 
  11   1   3   42.30   15.00 
 -12  -1  -3   33.00   17.10 
 -12  -1  -3   43.80   17.60 
 -12  -1  -3   99.39   17.90 
  12  -1   3   97.59   19.70 
  12  -1   3   89.19   21.00 
 -12   1  -3   66.89   19.30 
  12   1   3   75.69   20.00 
 -12   1  -3   31.00   18.70 
 -13  -1  -3   17.70    9.60 
  13  -1   3   27.00   15.20 
 -13  -1  -3   24.00   10.80 
  13  -1   3   17.70   15.30 
 -13  -1  -3   28.40   12.90 
  13  -1   3    6.20   12.40 
  13   1   3   -5.40   12.60 
  13   1   3   -1.70   14.50 
 -13   1  -3   18.70   14.10 
 -13   1  -3    8.30    7.90 
 -14  -1  -3   11.50   13.20 
 -14  -1  -3    8.90   10.80 
  14  -1   3  -22.40   16.40 
  14  -1   3    3.40   14.90 
 -14  -1  -3   58.39   15.70 
 -14   1  -3   28.80   14.50 
  14   1   3    2.80   16.40 
  14   1   3   25.60   16.20 
 -14   1  -3    7.70    8.50 
  15  -1   3   41.80   16.70 
 -15  -1  -3    8.40   10.80 
  15  -1   3    4.20   16.90 
  15  -1   3   -6.50   19.10 
 -15  -1  -3   -5.70   14.10 
  15   1   3   -9.40   15.60 
 -15   1  -3   18.00   16.30 
 -15   1  -3    1.40   11.30 
  15   1   3   -1.10   19.20 
 -16  -1  -3    1.90   19.20 
  16  -1   3   42.00   20.50 
  16  -1   3   37.40   18.50 
 -16  -1  -3   78.59   22.50 
  16  -1   3   -5.80   23.50 
 -16  -1  -3    3.30   12.20 
 -16   1  -3    9.90   12.70 
  16   1   3   11.40   22.90 
 -16  -2   3    0.00   25.70 
  16  -2  -3  -26.90   26.50 
  16  -2  -3   32.60   30.10 
  16  -2  -3   73.79   22.10 
 -16  -2   3   43.20   17.70 
 -16  -2   3   39.10   23.50 
  16   2  -3    2.40   23.50 
 -16   2   3   34.30   20.50 
 -15  -2   3    0.90   14.40 
 -15  -2   3    8.90   17.90 
  15  -2  -3   -6.30   23.50 
  15  -2  -3  -18.10   15.00 
 -15  -2   3   26.90   14.80 
 -15   2   3   -2.90   15.00 
  15   2  -3   13.60   19.70 
 -15   2   3   -0.20   12.80 
  15   2  -3   -0.10   22.50 
 -14  -2   3   10.50   11.20 
 -14  -2   3   18.30   13.40 
 -14  -2   3   24.10   15.40 
  14  -2  -3    3.40   16.90 
  14  -2  -3   27.50   20.30 
  14   2  -3   -4.20   16.30 
 -14   2   3   22.40   11.40 
  14   2  -3  -11.20   16.10 
 -14   2   3   -1.20   12.50 
 -13  -2   3    1.20   10.90 
  13  -2  -3   -8.00   14.50 
  13  -2  -3   43.90   14.20 
 -13  -2   3   18.00   12.90 
 -13  -2   3   -5.10   11.60 
  13  -2  -3   33.80   13.50 
 -13   2   3    4.50   10.50 
  13   2  -3   19.80   16.50 
 -12  -2   3    8.50   11.30 
  12  -2  -3   -6.90   11.60 
 -12  -2   3   -6.60    9.20 
  12  -2  -3   16.70   13.80 
  12  -2  -3   -3.70   11.50 
 -12  -2   3    3.80    8.80 
 -12   2   3    7.10    9.20 
  12   2  -3   11.10   13.20 
 -11  -2   3  -15.50    7.50 
 -11  -2   3  -14.80    7.80 
 -11  -2   3    8.50   10.40 
  11  -2  -3   -8.50    8.40 
  11  -2  -3   -9.50   12.40 
  11  -2  -3  -14.70   11.00 
  11   2  -3   16.40   10.30 
 -11   2   3   -5.60   10.10 
 -11   2   3    1.50    7.80 
 -10  -2   3    9.00    8.40 
 -10  -2   3    7.30    8.40 
  10  -2  -3   16.80   11.30 
 -10  -2   3   14.90    7.30 
  10  -2  -3    5.10    9.30 
  10  -2  -3    8.30   12.10 
 -10   2   3    3.50    8.50 
 -10   2   3   13.50    9.50 
  10   2  -3    5.00    8.50 
  10   2  -3   40.60   11.80 
  -9  -2   3   -3.80    6.00 
  -9  -2   3    4.30    6.10 
   9  -2  -3   16.10   10.60 
   9  -2  -3   -4.80    6.50 
   9  -2  -3    2.20    9.50 
  -9  -2   3   -8.90    6.80 
  -9   2   3    2.10    5.70 
   9   2  -3   18.10   15.50 
   9   2  -3    3.00    6.40 
  -8  -2   3   77.39   15.30 
  -8  -2   3   67.29   14.70 
  -8  -2   3   46.90   15.40 
   8  -2  -3   69.09   16.90 
   8  -2  -3   55.69   16.00 
  -8   2   3   35.90   14.40 
  -8   2   3   65.79   15.10 
   8   2  -3   49.20   15.80 
   8   2  -3   37.90   14.60 
  -7  -2   3    5.80    6.00 
   7  -2  -3    2.10    5.30 
   7  -2  -3    2.30    7.60 
   7  -2  -3   21.60    9.50 
  -7  -2   3    6.60    6.10 
  -7  -2   3    6.90    6.30 
  -7   2   3    2.80    5.20 
   7   2  -3    0.00    5.40 
   7   2  -3   -2.20    7.20 
  -7   2   3   15.80    6.20 
  -6  -2   3 1020.20  217.58 
   6  -2  -3  968.50  217.68 
  -6  -2   3  986.60  217.88 
  -6  -2   3 1001.80  217.58 
   6  -2  -3  998.20  217.98 
   6  -2  -3 1050.09  217.88 
   6   2  -3 1070.39  218.18 
   6   2  -3 1020.30  217.58 
  -6   2   3 1040.30  217.88 
   6   2  -3 1027.30  217.78 
  -6   2   3 1046.60  217.58 
   5  -2  -3  171.18   34.20 
  -5  -2   3  165.38   32.90 
  -5  -2   3  152.38   33.20 
   5  -2  -3  124.79   33.10 
  -5  -2   3  148.79   33.50 
   5  -2  -3  157.28   34.20 
  -5  -2   3  122.49   33.30 
  -5   2   3  142.59   33.40 
   5   2  -3  158.88   33.40 
   5   2  -3  156.88   34.30 
  -5   2   3  159.98   33.30 
   5   2  -3  164.68   33.30 
  -4  -2   3  239.98   53.99 
   4  -2  -3  238.78   53.79 
  -4  -2   3  235.88   53.89 
   4  -2  -3  230.88   54.39 
  -4  -2   3  270.47   53.79 
   4  -2  -3  264.87   54.39 
  -4   2   3  262.57   53.79 
   4   2  -3  257.77   53.99 
   4   2  -3  254.47   54.49 
  -4   2   3  249.58   53.89 
  -4   2   3  242.58   54.29 
   4   2  -3  255.87   53.89 
   3  -2  -3  414.76   82.29 
   3  -2  -3  398.86   81.89 
   3  -2  -3  375.76   81.89 
  -3  -2   3  344.77   82.09 
  -3  -2   3  366.96   82.09 
  -3  -2   3  422.76   81.89 
   3  -2  -3  367.36   82.39 
  -3   2   3  363.06   82.39 
  -3   2   3  374.06   81.79 
   3   2  -3  403.56   82.49 
   3   2  -3  388.06   82.09 
  -2  -2   3  635.24  133.09 
  -2  -2   3  597.24  133.19 
  -2  -2   3  651.03  132.89 
   2  -2  -3  606.14  133.39 
   2   2  -3  630.74  133.19 
  -2   2   3  597.84  132.89 
  -2   2   3  622.44  133.39 
   2   2  -3  654.43  133.39 
   1  -2  -3   84.09   20.30 
  -1  -2   3   93.29   20.20 
  -1  -2   3   86.59   19.60 
   1   2  -3   83.79   20.00 
  -1   2   3   89.59   20.40 
   1   2  -3  104.79   20.60 
   0  -2  -3   64.19   14.50 
   0  -2   3   58.29   14.50 
   0   2   3   58.39   14.50 
   0   2  -3   60.09   14.60 
   0   2  -3   66.09   14.30 
  -1  -2  -3   24.60    7.50 
   1  -2   3   17.60    6.20 
   1  -2   3   10.90    6.00 
   1  -2   3   17.60    5.80 
  -1   2  -3   21.70    6.90 
  -1   2  -3   19.60    6.30 
   1   2   3   18.90    6.90 
  -2  -2  -3    2.40    2.70 
   2  -2   3    4.10    4.20 
  -2  -2  -3    6.00    4.30 
   2  -2   3    0.10    4.00 
   2  -2   3    5.40    3.80 
  -2  -2  -3    6.60    5.60 
   2   2   3    3.70    4.80 
   2   2   3    1.10    3.90 
  -2   2  -3   12.90    6.10 
  -2   2  -3   -0.30    3.80 
  -2   2  -3    0.80    1.70 
   3  -2   3   45.70   11.30 
  -3  -2  -3   32.00   10.40 
  -3  -2  -3   48.90   10.40 
  -3  -2  -3   52.29   11.60 
   3  -2   3   33.00   10.90 
  -3   2  -3   42.50   10.60 
   3   2   3   32.50   10.80 
   3   2   3   49.70   11.50 
   3   2   3   49.00   11.40 
  -3   2  -3   56.39   12.40 
  -4  -2  -3   -0.10    5.40 
  -4  -2  -3    0.70    3.10 
   4  -2   3    2.80    5.80 
   4  -2   3    3.20    4.50 
  -4   2  -3   10.00    6.80 
   4   2   3    4.10    5.90 
  -4   2  -3    4.30    3.90 
  -4   2  -3    3.30    3.40 
   4   2   3   -3.80    5.20 
   4   2   3    0.60    4.00 
  -5  -2  -3   13.80    6.20 
   5  -2   3   24.80    7.80 
  -5   2  -3   45.20    9.70 
  -5   2  -3   24.80    6.80 
   5   2   3   32.20    8.90 
   5   2   3   20.50    6.00 
   6  -2   3   73.59   14.80 
  -6  -2  -3   40.00   12.70 
   6  -2   3   45.40   14.10 
   6   2   3   67.29   14.90 
  -6   2  -3   54.49   13.40 
   6   2   3   47.50   14.50 
  -6   2  -3   69.89   15.00 
  -7  -2  -3   35.10   10.20 
  -7  -2  -3   39.90   10.60 
   7  -2   3   14.50    8.90 
  -7  -2  -3   25.60    8.80 
   7  -2   3   37.50   10.80 
  -7   2  -3   45.60   11.00 
   7   2   3   15.90    9.30 
  -7   2  -3   27.60    8.50 
   7   2   3   38.50   10.90 
  -8  -2  -3   49.40   16.00 
   8  -2   3   49.20   16.50 
  -8  -2  -3   85.99   17.20 
   8  -2   3   77.29   19.00 
  -8  -2  -3   72.79   17.20 
   8  -2   3   78.99   17.70 
   8   2   3   61.99   17.60 
  -8   2  -3   52.49   16.20 
   8   2   3   82.09   18.90 
  -9  -2  -3    5.60    8.10 
   9  -2   3  -15.40   12.10 
  -9  -2  -3   10.00    7.90 
  -9  -2  -3    1.70    5.40 
   9  -2   3    4.50    7.80 
   9  -2   3    3.10    9.20 
  -9   2  -3   12.80    8.50 
   9   2   3   16.90    7.90 
   9   2   3    0.90    8.60 
  -9   2  -3    0.00    6.00 
  10  -2   3   68.69   23.30 
 -10  -2  -3   58.29   15.90 
  10  -2   3   51.19   16.00 
  10  -2   3   30.10   15.70 
 -10  -2  -3   88.59   20.30 
  10   2   3   63.99   17.10 
 -10   2  -3   76.99   17.60 
  10   2   3   29.30   16.00 
  11  -2   3  166.08   29.40 
 -11  -2  -3   88.59   26.20 
  11  -2   3  120.39   29.90 
 -11  -2  -3  128.89   28.00 
  11   2   3  104.69   28.20 
 -11   2  -3  102.29   26.30 
 -12  -2  -3    7.10   11.40 
 -12  -2  -3   12.30    8.40 
  12  -2   3   48.20   17.40 
 -12  -2  -3   32.30   12.20 
  12  -2   3   29.50   13.80 
  12  -2   3    2.20   11.10 
 -12   2  -3   12.70    9.30 
  12   2   3    2.70   13.20 
 -13  -2  -3   37.40   15.40 
 -13  -2  -3    2.00    9.30 
  13  -2   3  -14.20   13.00 
  13  -2   3   -4.00   15.20 
 -13  -2  -3    6.20   11.80 
  13  -2   3   48.80   18.80 
  13   2   3    1.90   14.40 
 -13   2  -3   13.10    9.20 
 -14  -2  -3   -7.90    9.20 
  14  -2   3   -2.90   13.90 
 -14  -2  -3   17.20   19.00 
 -14  -2  -3  -13.70   13.30 
  14  -2   3   -2.30   17.30 
 -14   2  -3  -22.50   14.70 
  14   2   3  -24.90   16.90 
 -14   2  -3    2.50   10.30 
  14   2   3   15.40   18.60 
  15  -2   3   27.90   25.70 
 -15  -2  -3   12.20   19.30 
  15  -2   3  -14.10   18.70 
 -15  -2  -3    7.20   12.10 
  15  -2   3   24.90   28.10 
 -15   2  -3    0.90   13.10 
  15   2   3   -7.20   20.80 
 -15  -3   3   42.10   23.80 
  15  -3  -3   13.70   27.80 
  15  -3  -3   89.89   35.20 
 -15  -3   3   -1.50   16.60 
  15   3  -3   -4.50   24.60 
 -15   3   3    7.80   14.70 
 -14  -3   3   16.20   13.30 
 -14  -3   3   25.60   14.30 
  14  -3  -3    6.00   17.40 
  14  -3  -3  -23.50   21.60 
 -14  -3   3   33.50   19.70 
 -14   3   3    4.20   16.10 
  14   3  -3  107.19   28.80 
  14   3  -3    2.00   19.30 
 -14   3   3   11.70   14.70 
 -13  -3   3    7.40   11.20 
 -13  -3   3   12.20   12.10 
 -13  -3   3   36.70   15.00 
  13  -3  -3   15.30   17.70 
  13  -3  -3    2.80   14.00 
 -13   3   3   -3.10   12.70 
 -13   3   3   -3.80   13.00 
  13   3  -3   14.70   17.10 
  13   3  -3    7.60   22.50 
 -12  -3   3   -0.50    9.40 
  12  -3  -3    8.60   15.90 
 -12  -3   3   10.50   10.90 
  12  -3  -3    8.80   11.70 
  12   3  -3   -4.80   17.20 
  12   3  -3   10.50   16.90 
 -12   3   3   12.60   10.40 
 -12   3   3   16.50   12.60 
 -11  -3   3    9.10   10.00 
  11  -3  -3  -19.60   13.70 
 -11  -3   3    9.30    8.70 
  11  -3  -3   -0.40   10.10 
 -11  -3   3   19.90   11.30 
 -11   3   3   14.00   10.10 
  11   3  -3    3.70   13.00 
 -10  -3   3   46.00   11.60 
  10  -3  -3   77.29   17.70 
  10  -3  -3   14.70   14.50 
 -10  -3   3   76.09   13.90 
 -10  -3   3   14.30   10.60 
  10  -3  -3    9.50   12.60 
  10   3  -3   26.40   16.10 
 -10   3   3   43.10   11.80 
 -10   3   3   24.80   11.80 
  10   3  -3   24.10   14.40 
  -9  -3   3  199.78   39.80 
  -9  -3   3  191.38   39.60 
   9  -3  -3  188.08   41.60 
  -9  -3   3  148.69   39.80 
  -9   3   3  191.58   39.80 
  -9   3   3  162.68   39.80 
   9   3  -3  173.68   41.40 
   9   3  -3  162.78   41.00 
  -8  -3   3    7.60    6.90 
  -8  -3   3   15.80    9.00 
  -8  -3   3    5.50    6.70 
   8  -3  -3   14.60   10.40 
   8  -3  -3   32.10   13.70 
   8  -3  -3   -1.00    8.40 
   8   3  -3   -5.20    9.90 
  -8   3   3   -1.00    8.00 
  -8   3   3   -5.00    6.20 
   8   3  -3   -3.10    8.10 
  -7  -3   3   67.79   15.80 
  -7  -3   3   32.40   13.80 
   7  -3  -3   57.09   15.40 
   7  -3  -3   32.40   14.00 
  -7  -3   3   66.99   14.00 
   7  -3  -3   83.59   19.50 
   7   3  -3   43.30   15.20 
  -7   3   3   60.69   13.70 
   7   3  -3   48.40   14.60 
  -7   3   3   54.89   13.90 
   6  -3  -3   20.50   13.50 
   6  -3  -3   34.30    9.70 
  -6  -3   3   12.20    6.90 
  -6  -3   3   34.90    8.80 
   6  -3  -3    3.30    6.60 
  -6  -3   3   29.30    7.60 
   6   3  -3   13.80    8.10 
  -6   3   3   17.90    6.70 
  -6   3   3    5.70    6.20 
   6   3  -3   33.60   10.50 
  -5  -3   3    2.80    4.80 
   5  -3  -3    2.40    9.50 
  -5  -3   3   -4.20    6.60 
   5  -3  -3    1.90    5.20 
  -5  -3   3    3.10    4.70 
   5  -3  -3    8.60    7.10 
   5  -3  -3    4.40    5.00 
  -5  -3   3    4.30    6.70 
  -5   3   3   10.70    4.50 
   5   3  -3    0.30    4.90 
  -5   3   3   -4.80    3.60 
   5   3  -3    3.70    7.90 
   4  -3  -3   -0.80    5.50 
   4  -3  -3    7.30    9.80 
  -4  -3   3    1.30    3.90 
  -4  -3   3    3.00    4.30 
  -4  -3   3   -3.20    6.10 
  -4  -3   3    0.30    6.80 
   4   3  -3   12.10    7.30 
   4   3  -3   -3.50    4.40 
  -4   3   3    7.80    3.70 
   4   3  -3    4.90    4.30 
  -3  -3   3   16.50    9.00 
   3  -3  -3   12.00   10.00 
  -3  -3   3    9.20    6.90 
   3  -3  -3   22.40    6.50 
   3   3  -3   12.20    6.90 
   3   3  -3   21.20    7.80 
   2  -3  -3   30.40    9.30 
  -2  -3   3   46.00   12.70 
  -2  -3   3   39.10   10.50 
   2  -3  -3   40.40   12.30 
   2   3  -3   21.30    9.30 
   1  -3  -3  287.47   63.39 
  -1  -3   3  275.97   63.09 
  -1  -3   3  310.17   63.59 
   1  -3  -3  299.47   63.09 
   1   3  -3  290.67   63.09 
   0  -3  -3   22.10    7.90 
   0  -3   3   12.50    6.50 
   0  -3   3    8.50    8.60 
   0  -3  -3    6.60    7.20 
   0   3  -3    5.50    4.60 
  -1  -3  -3   22.80    8.00 
  -1  -3  -3   26.30    8.60 
   1  -3   3    4.50    5.90 
   1  -3   3   13.40    9.60 
  -1   3  -3   11.10    6.40 
  -2  -3  -3   46.00   11.70 
   2  -3   3   34.40    9.60 
  -2  -3  -3   36.30   11.30 
   2  -3   3   55.19   14.70 
  -2   3  -3   26.30   10.50 
  -3  -3  -3    1.00    6.90 
   3  -3   3   -2.80    9.60 
   3  -3   3   -0.30    4.30 
  -3  -3  -3    9.20    6.30 
   3   3   3    8.10    5.20 
  -3   3  -3    6.90    5.40 
  -3   3  -3    3.20    4.60 
  -4  -3  -3   -2.80    3.20 
   4  -3   3    0.60    5.10 
  -4  -3  -3   -1.40    4.90 
  -4  -3  -3    7.70    7.10 
   4  -3   3   12.00   10.80 
   4  -3   3   -1.10    5.50 
  -4  -3  -3    1.10    4.50 
   4   3   3   -7.90    5.30 
  -4   3  -3   -2.00    5.00 
  -4   3  -3    2.20    2.50 
  -4   3  -3    2.90    5.60 
   4   3   3    2.30    4.40 
  -5  -3  -3    4.60    7.90 
  -5  -3  -3    2.80    3.90 
   5  -3   3    1.70    6.40 
   5  -3   3   23.40   12.30 
  -5  -3  -3    3.20    4.90 
   5  -3   3    5.70    5.80 
  -5   3  -3    3.70    6.90 
   5   3   3   -3.80    6.90 
  -5   3  -3    5.30    3.70 
   5   3   3    1.70    5.30 
  -5   3  -3   -2.40    4.70 
  -6  -3  -3   57.99   14.60 
  -6  -3  -3   83.59   18.50 
   6  -3   3   47.90   15.50 
  -6  -3  -3   42.90   13.80 
   6  -3   3   73.39   15.70 
  -6   3  -3   51.69   14.30 
  -6   3  -3   68.49   15.70 
   6   3   3   75.09   16.80 
   6   3   3   51.39   16.10 
  -7  -3  -3  224.58   53.89 
   7  -3   3  270.97   54.69 
  -7  -3  -3  278.77   54.69 
   7  -3   3  197.18   54.59 
   7  -3   3  308.87   55.89 
  -7  -3  -3  293.97   54.39 
   7   3   3  202.88   54.79 
  -7   3  -3  283.87   58.09 
  -7   3  -3  212.38   53.79 
   8  -3   3  174.78   65.09 
   8  -3   3  327.67   62.39 
   8  -3   3  266.17   61.59 
  -8  -3  -3  287.47   60.99 
  -8  -3  -3  276.97   61.29 
  -8   3  -3  285.07   61.39 
   8   3   3  279.77   61.69 
   9  -3   3   16.60   17.70 
  -9  -3  -3    7.00   10.40 
   9  -3   3    5.40   11.10 
   9  -3   3    4.00    9.60 
  -9  -3  -3    5.00    6.70 
  -9  -3  -3   19.80    8.80 
   9   3   3    4.40   12.10 
  -9   3  -3   17.50    8.50 
   9   3   3    5.90   10.20 
  -9   3  -3    6.80    6.10 
  10  -3   3  -10.50    9.30 
  10  -3   3    9.50   11.40 
 -10  -3  -3    0.10   11.80 
 -10  -3  -3   12.30    9.70 
  10  -3   3   12.30   24.40 
 -10  -3  -3    2.00    7.00 
  10   3   3   -4.00   10.90 
 -10   3  -3    2.90    6.80 
  11  -3   3   -6.70   13.20 
 -11  -3  -3   19.10   10.90 
  11  -3   3   11.20   11.70 
 -11  -3  -3   -4.30    7.40 
 -11   3  -3   -8.00    8.10 
  11   3   3  -21.80   14.10 
 -11   3  -3   23.30   11.30 
  11   3   3   -4.10   14.30 
 -12  -3  -3   -4.70    8.80 
 -12  -3  -3   -6.40   12.40 
  12  -3   3   23.60   21.90 
  12  -3   3    0.90   12.90 
 -12  -3  -3    6.60   17.10 
  12  -3   3   19.80   15.30 
  12   3   3  -12.60   17.60 
  12   3   3  -15.00   16.00 
 -12   3  -3    2.70   13.10 
 -12   3  -3   -7.40    8.70 
  13  -3   3   31.60   26.20 
  13  -3   3  -20.00   20.20 
  13  -3   3   -1.20   16.20 
 -13  -3  -3  -11.10   20.20 
 -13  -3  -3   15.20   10.50 
  13   3   3    7.80   16.90 
 -13   3  -3    6.70   11.50 
  13   3   3  -35.60   21.20 
 -13   3  -3   -6.80   15.70 
  14  -3   3   78.19   29.90 
  14  -3   3   -2.80   17.80 
  14  -3   3   -9.30   23.00 
 -14  -3  -3    0.90   12.90 
 -14  -3  -3   39.30   17.00 
 -14  -3  -3   14.80   24.10 
  14   3   3   44.50   23.00 
 -14   3  -3   -1.20   12.40 
 -13  -4   3   13.80   23.20 
  13  -4  -3  -16.40   17.50 
  13  -4  -3   37.70   30.50 
 -13  -4   3   31.50   14.40 
 -13  -4   3   16.80   16.00 
  13   4  -3  -17.20   22.40 
 -13   4   3   30.30   13.90 
 -12  -4   3   27.50   17.50 
  12  -4  -3   26.00   22.60 
 -12  -4   3   23.90   13.00 
  12  -4  -3  -12.10   16.40 
  12   4  -3   -0.40   18.80 
 -12   4   3    5.90   13.60 
  12   4  -3   47.00   25.90 
 -12   4   3   25.20   12.90 
 -11  -4   3   18.40   12.20 
 -11  -4   3   63.89   16.00 
  11  -4  -3   83.59   21.40 
  11  -4  -3    3.50   15.10 
  11   4  -3   19.30   22.00 
 -11   4   3   32.50   13.10 
 -11   4   3   18.00   12.50 
  11   4  -3    3.00   17.20 
 -10  -4   3   29.60   10.40 
  10  -4  -3   -9.70   12.30 
  10  -4  -3   74.69   17.80 
 -10  -4   3   23.20   13.20 
  10  -4  -3   58.59   20.40 
 -10  -4   3    5.80    9.70 
 -10   4   3   12.50   10.10 
  10   4  -3    2.40   14.20 
  10   4  -3   -6.70   18.10 
   9  -4  -3   30.10   17.20 
   9  -4  -3    6.50   14.80 
  -9  -4   3   -6.50    8.10 
   9  -4  -3   -3.10    9.70 
  -9  -4   3    3.50    7.80 
  -9  -4   3   22.20    9.90 
  -9   4   3   26.70    8.60 
  -9   4   3  -16.00    8.30 
   9   4  -3   -9.60   12.00 
   9   4  -3   -9.20   19.20 
  -8  -4   3   15.90    7.90 
  -8  -4   3    6.80    7.90 
   8  -4  -3   25.90   13.00 
   8   4  -3    3.70   13.50 
  -8   4   3   14.30    7.80 
   8   4  -3   -1.60   11.20 
  -8   4   3   16.40    7.50 
  -7  -4   3   11.40    6.90 
  -7  -4   3   14.20    6.60 
  -7  -4   3   10.60    7.40 
   7  -4  -3   -5.10    7.60 
  -7   4   3   17.70    7.50 
  -7   4   3   14.20    6.20 
   7   4  -3   -1.40    9.60 
   7   4  -3  -10.50   12.60 
  -6  -4   3    0.70    8.20 
  -6  -4   3    7.40    5.70 
   6  -4  -3   -8.60    6.70 
  -6  -4   3   -4.10    6.00 
   6   4  -3   -5.70    7.10 
   6   4  -3  -16.30   11.40 
  -5  -4   3    1.80    9.30 
   5  -4  -3    3.30   14.20 
   5  -4  -3   15.40    7.60 
   5   4  -3  -12.00   10.20 
  -4  -4   3    3.00    7.70 
   4  -4  -3   31.20    8.90 
   4  -4  -3   -6.10   12.10 
   3  -4  -3    9.10    7.70 
  -3  -4   3   -0.50   10.60 
   3  -4  -3   -7.20   11.70 
  -3  -4   3    2.30    7.30 
  -2  -4   3   -0.20   11.20 
  -2  -4   3   19.10    8.20 
   2  -4  -3    0.50    8.10 
   2  -4  -3   14.40   11.50 
   1  -4  -3    3.60   12.10 
   1  -4  -3    4.10    7.90 
  -1  -4   3   22.60   12.90 
  -1  -4   3    4.90    8.20 
   0  -4   3   -2.70    7.20 
   0  -4  -3  -16.20    8.80 
   0  -4  -3   12.60    9.60 
   0  -4   3    4.40   11.80 
  -1  -4  -3   -4.20    8.70 
   1  -4   3   -3.20    6.60 
  -1  -4  -3    9.10    9.90 
   2  -4   3   71.99   17.00 
  -2  -4  -3   75.29   18.90 
  -2  -4  -3   56.19   17.90 
   2  -4   3   85.99   22.20 
   3  -4   3  283.97   59.29 
  -3  -4  -3  255.47   57.39 
  -3  -4  -3  249.78   58.19 
   3  -4   3  270.87   57.19 
   4  -4   3  232.88   52.89 
   4  -4   3  271.97   56.09 
  -4  -4  -3  228.88   52.99 
  -4  -4  -3  268.17   54.29 
   5  -4   3   36.30   18.50 
  -5  -4  -3   11.60    6.80 
   5   4   3   -3.50    8.80 
  -5   4  -3   10.90    6.40 
  -6  -4  -3   31.90   10.40 
   6  -4   3   56.09   16.30 
  -6  -4  -3   34.60   11.10 
   6  -4   3   32.50   12.80 
  -6   4  -3   61.29   14.20 
   6   4   3   74.69   15.40 
   7  -4   3   -1.30   11.20 
   7  -4   3   -3.80    9.60 
  -7  -4  -3   13.90    7.70 
  -7   4  -3   10.90    7.70 
  -7   4  -3    0.20    6.90 
   7   4   3   31.60   12.70 
   7   4   3   17.70   10.90 
  -8  -4  -3   -5.10   13.20 
  -8  -4  -3   -4.50    8.30 
  -8  -4  -3   -2.70    5.80 
   8  -4   3    1.30   11.50 
   8  -4   3    0.80   11.50 
   8   4   3   -3.70   11.70 
   8   4   3   16.60   13.00 
  -8   4  -3   -8.70    8.40 
  -8   4  -3    5.00    7.10 
   9  -4   3   17.80   13.40 
   9  -4   3   -9.90   12.40 
   9  -4   3   54.69   24.80 
  -9  -4  -3    3.70    7.10 
  -9  -4  -3  -21.20    8.90 
  -9  -4  -3   23.70   13.60 
  -9   4  -3   -6.10    8.20 
   9   4   3    1.70   13.40 
 -10  -4  -3   23.50    8.80 
 -10  -4  -3   32.30   15.70 
 -10  -4  -3   -5.20   10.60 
  10  -4   3  -13.20   15.10 
  10  -4   3   31.00   26.50 
  10  -4   3  -15.50   14.30 
 -10   4  -3   11.90   11.40 
  10   4   3   -7.80   15.00 
 -10   4  -3    9.70    9.70 
  10   4   3  -11.40   17.00 
  11  -4   3   -0.30   16.10 
 -11  -4  -3   11.40    9.70 
  11  -4   3  -13.30   17.60 
 -11  -4  -3  -22.60   11.90 
 -11  -4  -3    0.40   18.70 
  11  -4   3   74.39   29.90 
  11   4   3  -12.30   17.20 
 -11   4  -3  -29.20   13.40 
  11   4   3   69.99   20.40 
 -11   4  -3    8.30   11.10 
 -12  -4  -3   -5.20   22.40 
  12  -4   3   26.90   19.70 
  12  -4   3   -7.70   20.20 
 -12  -4  -3   -5.70   14.10 
 -12  -4  -3    5.50   10.90 
 -12   4  -3   -2.70   16.60 
  12   4   3   27.80   24.90 
  12   4   3   -3.90   19.90 
 -12   4  -3   12.70   12.40 
 -10  -5   3   15.80   11.50 
 -10   5   3    9.60   12.00 
  -9  -5   3    3.70    9.10 
   9   5  -3   -9.10   15.30 
   8  -5  -3   53.79   25.40 
  -8  -5   3   35.50   15.50 
  -7  -5   3    6.80   13.80 
  -7  -5   3   25.20   10.70 
   6  -5  -3   -8.30   10.50 
  -6  -5   3    5.90   11.40 
  -6  -5   3   23.40   12.40 
   6  -5  -3    6.10   19.70 
   5  -5  -3    1.70   11.50 
  -5  -5   3   10.20   12.50 
   5  -5  -3   60.89   19.30 
  -5  -5   3    9.30   11.20 
  -4  -5   3    7.90   11.60 
   4  -5  -3   22.60   11.50 
   4  -5  -3   43.00   18.60 
  -4  -5   3   30.10   22.70 
   3  -5  -3   21.50   16.70 
   3  -5  -3   10.00   11.00 
  -3  -5   3    4.70   14.50 
  -3  -5   3   -0.50   11.20 
  -2  -5   3    9.10   10.70 
   2  -5  -3    3.40   11.00 
   2  -5  -3   16.80   15.30 
  -2  -5   3   -4.60   14.80 
  -1  -5   3    2.10   10.50 
   1  -5  -3   13.90   14.20 
  -1  -5   3   22.70   16.20 
   1  -5  -3    0.90   11.70 
   0  -5   3   79.99   20.50 
   0  -5   3   39.80   13.70 
   0  -5  -3    9.80   14.90 
   1  -5   3   54.59   22.70 
  -1  -5  -3   65.29   19.80 
  -2  -5  -3   29.50   15.20 
  -2  -5  -3   44.80   14.80 
   2  -5   3   31.80   19.70 
   2  -5   3   28.30   12.30 
   3  -5   3   19.10   23.10 
  -3  -5  -3   48.30   18.50 
  -3  -5  -3   59.99   16.30 
  -4  -5  -3   23.70   16.70 
   4  -5   3   52.89   24.40 
   5  -5   3   20.10   24.40 
  -5  -5  -3    2.30    8.70 
  -5  -5  -3    8.10   15.40 
   6  -5   3   59.29   28.10 
  -6  -5  -3   40.30   19.00 
   7  -5   3   44.50   28.80 
  -7  -5  -3    0.00   16.20 
   7   5   3  -10.30   13.40 
   8   5   3  -19.40   27.40 
  -9  -5  -3    5.90    8.60 
  -9   5  -3  -15.30   12.20 
   9   5   3  -15.30   21.10 
  -4  -6   3   75.49   21.90 
   4  -6  -3   -6.60   18.60 
   3  -6  -3   18.50   33.80 
   3  -6  -3   17.40   18.50 
  -3  -6   3   55.49   21.80 
   2  -6  -3   50.39   25.20 
  -2  -6   3   68.09   22.60 
  -2  -6   3   24.80   18.50 
   2  -6  -3   22.70   19.40 
   1  -6  -3  121.19   34.60 
   1  -6  -3   35.60   23.00 
  -1  -6   3   68.19   27.20 
   0  -6   3   69.79   26.50 
   0  -6   3   28.60   20.50 
   0  -6  -3   61.49   21.70 
   0  -6  -3   43.70   23.60 
  -1  -6  -3   18.40   20.10 
   1  -6   3   80.39   26.40 
   1  -6   3   14.60   16.20 
  -1  -6  -3   13.80   21.80 
   2  -6   3   72.89   33.10 
  -2  -6  -3   65.09   23.00 
  -3  -6  -3  -26.00   15.80 
  -4  -6  -3  -12.00   15.30 
  17   0  -4   49.10   27.20 
 -17   0   4   11.40   17.20 
  17   0  -4  -25.70   21.10 
 -16   0   4   -2.40   14.90 
 -16   0   4   20.10   12.40 
  16   0  -4   27.20   22.00 
  16   0  -4    3.00   19.50 
  15   0  -4   16.50   14.10 
 -15   0   4    6.50   12.40 
  15   0  -4   30.10   17.90 
 -15   0   4   18.50   12.30 
  14   0  -4    8.20   13.40 
 -14   0   4  -16.80    9.70 
  14   0  -4   11.70   14.00 
 -14   0   4    3.40   11.70 
  13   0  -4    6.90    6.60 
  13   0  -4   11.60    9.10 
  13   0  -4   -4.70   13.50 
 -13   0   4    2.60    8.60 
  12   0  -4   33.10    8.70 
  12   0  -4    6.00    9.40 
 -12   0   4   30.80   10.90 
  12   0  -4   -1.50   18.60 
 -11   0   4   14.20   14.60 
  11   0  -4   23.60   10.80 
  11   0  -4   27.80    7.60 
 -11   0   4    3.20    8.00 
  11   0  -4    9.60    8.50 
  10   0  -4   36.50    8.80 
 -10   0   4   27.90   10.20 
  10   0  -4   22.30   12.50 
  10   0  -4   24.00   11.70 
  -9   0   4  599.64  123.39 
   9   0  -4  549.35  123.59 
   9   0  -4  602.44  122.79 
   9   0  -4  592.34  123.99 
  -9   0   4  523.75  123.69 
   8   0  -4  285.07   71.09 
   8   0  -4  342.37   71.89 
  -8   0   4  346.17   71.19 
   8   0  -4  361.96   70.49 
  -8   0   4  298.77   71.39 
  -7   0   4  192.28   41.60 
   7   0  -4  203.38   42.50 
  -7   0   4  171.68   40.90 
   7   0  -4  181.28   41.50 
   7   0  -4  205.98   40.90 
   6   0  -4  343.67   69.99 
  -6   0   4  322.47   70.69 
  -6   0   4  314.07   69.99 
   6   0  -4  344.37   71.19 
  -6   0   4  339.47   70.49 
   6   0  -4  332.47   70.49 
   6   0  -4  305.27   69.89 
   5   0  -4  203.78   47.70 
  -5   0   4  217.18   46.40 
   5   0  -4  233.48   46.40 
  -5   0   4  217.38   46.90 
   5   0  -4  202.08   46.80 
  -5   0   4  218.48   47.10 
   5   0  -4  212.78   46.30 
   4   0  -4  845.32  172.68 
  -4   0   4  810.72  172.18 
   4   0  -4  821.82  172.18 
  -4   0   4  804.02  172.48 
   4   0  -4  788.42  171.88 
  -4   0   4  784.52  171.98 
   3   0  -4  132.39   26.60 
  -3   0   4  100.79   25.40 
  -3   0   4  118.49   24.60 
   3   0  -4  103.89   24.90 
  -3   0   4  117.19   25.10 
  -2   0   4  370.96   87.09 
   2   0  -4  392.76   86.79 
  -2   0   4  420.06   86.79 
   2   0  -4  448.66   87.49 
   1   0  -4 2295.07  515.85 
  -1   0   4 2387.56  516.15 
   1   0  -4 2585.24  516.25 
  -1   0   4 2442.66  515.95 
   0   0  -4  403.86   86.59 
   0   0  -4  414.36   86.19 
   0   0   4  396.06   86.49 
   0   0   4  400.56   86.19 
   1   0   4   99.49   22.00 
  -1   0  -4   99.29   22.20 
  -1   0  -4   92.19   21.00 
   1   0   4   95.39   21.20 
   2   0   4  989.90  203.18 
  -2   0  -4  932.61  203.18 
  -2   0  -4  972.30  203.48 
   2   0   4  922.01  203.38 
   3   0   4  331.67   67.49 
  -3   0  -4  283.17   67.19 
  -3   0  -4  333.07   67.89 
   4   0   4   44.50   12.00 
  -4   0  -4   49.20   11.30 
   4   0   4   33.80   11.20 
  -4   0  -4   67.69   13.20 
   5   0   4  488.65   95.89 
  -5   0  -4  414.26   95.49 
   5   0   4  395.96   95.69 
  -5   0  -4  493.95   96.09 
  -6   0  -4   15.20    6.00 
  -6   0  -4   24.60    8.30 
   6   0   4   20.00    7.70 
   6   0   4   14.80    7.40 
  -7   0  -4  265.87   55.59 
   7   0   4  239.98   55.39 
  -8   0  -4  203.98   45.40 
   8   0   4  201.68   45.30 
  -9   0  -4  104.79   25.70 
   9   0   4   99.79   25.90 
  10   0   4    4.40   10.30 
 -10   0  -4   14.70    8.10 
 -10   0  -4   43.20   11.70 
  10   0   4   25.20   10.40 
 -11   0  -4   49.80   16.90 
 -11   0  -4   59.89   13.90 
  11   0   4   36.50   17.50 
  11   0   4   55.69   16.30 
  12   0   4   67.19   15.70 
  12   0   4   26.20   16.60 
 -12   0  -4   55.69   17.40 
  12   0   4   56.69   18.60 
  13   0   4   19.40   11.30 
 -13   0  -4    4.20   11.20 
  13   0   4  -10.20   15.50 
 -13   0  -4    4.30    7.40 
  13   0   4    7.00   13.10 
  14   0   4   27.50   11.80 
  14   0   4  -17.50   12.60 
 -14   0  -4   20.90   14.90 
 -14   0  -4    0.50    7.70 
  14   0   4    9.00   20.10 
 -15   0  -4  -22.80   14.40 
 -15   0  -4    2.80    9.10 
  15   0   4   -0.90   15.30 
  15   0   4   25.70   20.40 
 -16   0  -4   57.49   19.80 
 -16   0  -4    8.60   14.10 
  16   0   4    4.50   21.30 
  16   0   4   16.50   23.90 
 -17  -1   4   26.50   16.60 
  17  -1  -4   -3.80   26.40 
  17   1  -4   10.40   20.40 
 -17   1   4   -5.40   15.40 
  16  -1  -4  -10.20   12.30 
 -16  -1   4    2.30   14.80 
 -16  -1   4    5.60   13.90 
  16  -1  -4   11.10   15.60 
  16  -1  -4   -2.70   23.40 
 -16   1   4    8.80   12.10 
 -16   1   4   -4.20   16.70 
  16   1  -4   -3.70   17.90 
  16   1  -4   35.40   23.60 
  15  -1  -4  -16.40   12.70 
 -15  -1   4    1.80   10.70 
  15  -1  -4    3.90   20.70 
  15   1  -4   15.90   20.60 
  15   1  -4   22.10   18.20 
 -15   1   4    2.30   11.10 
 -15   1   4   21.70   14.60 
  14  -1  -4  -14.10   14.00 
 -14  -1   4   -8.10   10.80 
 -14  -1   4   -9.80   11.20 
  14  -1  -4   -5.20   11.90 
 -14  -1   4    7.30   10.80 
  14  -1  -4   15.30    9.30 
 -14   1   4    1.30   11.10 
  14   1  -4   33.10   19.60 
 -14   1   4    5.70   12.90 
  14   1  -4   -7.30   12.30 
 -13  -1   4    1.30   10.10 
  13  -1  -4    0.30    8.70 
  13  -1  -4   -3.40   11.90 
 -13  -1   4    7.30    8.90 
 -13  -1   4   -7.90    7.80 
  13  -1  -4   -6.20   13.40 
  13   1  -4    9.00   13.60 
 -13   1   4    7.10    9.60 
  13   1  -4   -5.90   10.70 
 -13   1   4    2.80    8.80 
 -12  -1   4   21.80   10.30 
 -12  -1   4    6.40    9.80 
  12  -1  -4   18.30   10.30 
 -12  -1   4   31.80   10.00 
  12  -1  -4    2.60   11.60 
  12  -1  -4   40.00   11.00 
  12   1  -4   21.30   13.60 
 -12   1   4    7.20    8.60 
 -12   1   4   18.60   11.50 
  12   1  -4    9.80   11.70 
 -11  -1   4   42.70   11.30 
  11  -1  -4   44.60   13.50 
  11  -1  -4   12.20   12.20 
 -11  -1   4   39.40   11.20 
  11  -1  -4   40.40   12.20 
  11   1  -4   25.30   13.50 
 -11   1   4   10.00   11.00 
 -11   1   4   39.90   12.00 
 -10  -1   4    2.20    5.90 
 -10  -1   4   -0.80    6.40 
  10  -1  -4    2.90    6.00 
 -10  -1   4   10.30    6.80 
  10  -1  -4   -6.50    6.90 
  10  -1  -4    1.20    9.10 
 -10   1   4   -2.40    5.70 
 -10   1   4    9.40    7.30 
  10   1  -4   23.40   12.20 
  10   1  -4   -1.60    6.90 
   9  -1  -4   -0.50    6.90 
  -9  -1   4    2.30    6.20 
   9  -1  -4    9.40    8.20 
  -9  -1   4    0.00    6.00 
   9  -1  -4    2.60    6.60 
  -9  -1   4   17.00    7.60 
  -9   1   4   -0.30    6.20 
  -9   1   4    8.40    5.70 
   9   1  -4    1.10    7.90 
  -8  -1   4  114.49   23.60 
  -8  -1   4  113.09   24.20 
   8  -1  -4  102.59   25.20 
   8  -1  -4   75.19   23.80 
   8  -1  -4  112.59   23.90 
  -8  -1   4  101.19   24.40 
  -8   1   4  114.29   24.20 
   8   1  -4  120.39   25.60 
   8   1  -4   94.19   24.00 
   7  -1  -4   58.59   12.90 
  -7  -1   4   33.80    9.30 
  -7  -1   4   20.00    8.90 
   7  -1  -4   21.40    8.60 
  -7   1   4   49.40   10.10 
  -7   1   4   25.10    9.60 
   7   1  -4   39.90   11.00 
   7   1  -4   28.60    8.40 
   7   1  -4   27.20    8.80 
   6  -1  -4  414.86   91.09 
  -6  -1   4  427.96   91.49 
   6  -1  -4  425.26   91.19 
   6  -1  -4  460.95   91.79 
  -6  -1   4  426.46   90.89 
  -6  -1   4  408.46   90.49 
  -6  -1   4  443.16   91.19 
  -6   1   4  424.16   91.19 
   6   1  -4  426.26   90.89 
  -6   1   4  401.56   91.39 
  -6   1   4  422.26   91.09 
   6   1  -4  452.55   91.79 
   6   1  -4  408.96   91.19 
   5  -1  -4  221.88   47.70 
  -5  -1   4  223.78   46.80 
  -5  -1   4  207.38   46.60 
  -5  -1   4  207.28   47.10 
   5  -1  -4  193.68   46.70 
   5  -1  -4  219.58   46.80 
  -5   1   4  219.38   46.80 
   5   1  -4  228.78   46.80 
  -5   1   4  217.58   47.00 
   5   1  -4  202.98   46.50 
   5   1  -4  237.18   47.70 
  -5   1   4  227.58   46.90 
   4  -1  -4   89.49   19.50 
  -4  -1   4   79.69   19.20 
   4  -1  -4   83.99   20.90 
  -4  -1   4   76.99   19.70 
   4  -1  -4   85.09   19.00 
  -4  -1   4   91.99   19.40 
  -4   1   4   81.99   19.30 
  -4   1   4   80.69   19.60 
   4   1  -4   94.49   20.90 
  -4   1   4   89.29   19.30 
   4   1  -4   87.69   19.10 
   4   1  -4   85.79   19.10 
   3  -1  -4  659.23  152.98 
  -3  -1   4  781.62  153.08 
   3  -1  -4  753.72  153.48 
  -3  -1   4  701.13  152.98 
   3  -1  -4  681.43  153.08 
  -3  -1   4  733.13  153.28 
  -3   1   4  654.03  153.18 
  -3   1   4  717.93  152.98 
   3   1  -4  710.03  152.98 
   3   1  -4  761.92  153.58 
  -3   1   4  708.33  153.18 
   3   1  -4  767.32  153.08 
   2  -1  -4  228.08   46.70 
  -2  -1   4  231.28   45.90 
  -2  -1   4  225.38   46.00 
  -2  -1   4  209.18   46.20 
   2  -1  -4  211.38   46.00 
   2  -1  -4  191.78   45.70 
  -2   1   4  214.48   46.00 
   2   1  -4  223.88   45.90 
   2   1  -4  224.78   45.80 
  -2   1   4  190.28   46.00 
  -2   1   4  190.48   45.80 
   2   1  -4  234.28   46.90 
  -1  -1   4   71.39   14.10 
   1  -1  -4   67.39   15.80 
  -1  -1   4   70.99   15.00 
  -1  -1   4   60.59   14.10 
   1  -1  -4   54.39   13.80 
   1  -1  -4   64.59   14.60 
   1   1  -4   54.69   14.10 
  -1   1   4   57.19   14.20 
   1   1  -4   62.79   13.70 
   0  -1  -4  288.97   65.49 
   0  -1   4  322.27   65.19 
   0  -1   4  304.87   65.59 
   0  -1  -4  299.97   65.09 
   0   1  -4  315.27   65.69 
   0   1   4  292.77   65.19 
   0   1  -4  308.47   65.19 
   0   1   4  292.17   65.09 
   0   1  -4  316.07   65.09 
  -1  -1  -4  171.28   38.40 
  -1  -1  -4  157.68   37.80 
   1  -1   4  193.18   38.10 
   1  -1   4  169.38   38.40 
  -1   1  -4  181.08   37.80 
   1   1   4  177.48   38.00 
  -1   1  -4  175.98   37.80 
   1   1   4  172.98   38.30 
   1   1   4  176.68   37.90 
  -1   1  -4  187.08   38.60 
  -2  -1  -4   81.69   15.10 
   2  -1   4   56.69   13.60 
  -2  -1  -4   54.99   13.00 
   2  -1   4   48.90   13.80 
   2   1   4   50.99   13.70 
  -2   1  -4   65.29   14.70 
  -2   1  -4   52.89   12.80 
   2   1   4   56.09   13.50 
   3  -1   4  389.46   73.89 
  -3  -1  -4  360.56   74.09 
   3  -1   4  316.87   73.89 
  -3  -1  -4  312.07   73.49 
   3   1   4  348.57   73.79 
   3   1   4  319.47   73.79 
  -3   1  -4  369.36   74.19 
  -3   1  -4  342.87   73.59 
   4  -1   4   48.00   14.10 
   4  -1   4   76.39   14.90 
  -4  -1  -4   46.30   13.50 
  -4  -1  -4   78.79   15.40 
  -4   1  -4   62.29   13.80 
   4   1   4   53.59   14.50 
   4   1   4   62.19   14.70 
  -5  -1  -4  159.18   28.60 
   5  -1   4  148.99   28.30 
   5  -1   4  100.69   27.70 
  -5  -1  -4  110.69   27.30 
  -5   1  -4  121.39   27.30 
   5   1   4  145.19   28.20 
   5   1   4  107.89   27.70 
   6  -1   4    6.50    6.10 
  -6  -1  -4   20.20    8.30 
   6  -1   4   29.00    9.20 
  -6  -1  -4   19.30    6.20 
   6   1   4   13.10    7.40 
   6   1   4   17.30    7.90 
  -6   1  -4   32.40    9.20 
  -6   1  -4   11.70    5.70 
   7  -1   4   13.10    7.90 
  -7  -1  -4   -0.60    7.10 
  -7  -1  -4    5.10    3.80 
   7  -1   4    3.60    4.50 
   7   1   4    4.30    5.70 
  -7   1  -4    1.40    6.70 
  -7   1  -4    6.00    5.00 
   7   1   4    7.30    7.40 
  -8  -1  -4   86.89   21.10 
   8  -1   4   89.49   22.10 
  -8   1  -4   95.79   21.20 
   8   1   4   98.99   23.20 
   9  -1   4   94.59   20.10 
  -9  -1  -4   64.59   17.30 
   9  -1   4   84.39   20.30 
  -9   1  -4   64.39   17.10 
   9   1   4   46.10   18.00 
   9   1   4   97.29   19.80 
  -9   1  -4   90.49   20.00 
  10  -1   4   -4.70   11.70 
  10  -1   4    4.40   10.20 
 -10  -1  -4    1.10    8.30 
 -10  -1  -4   -8.70    8.20 
  10   1   4    0.20   10.00 
 -10   1  -4    0.70    4.70 
 -10   1  -4    4.00   10.50 
  10   1   4    3.10    8.20 
  11  -1   4   40.70   14.90 
  11  -1   4    7.20   10.20 
 -11  -1  -4   -2.40    8.70 
 -11  -1  -4   20.90    9.70 
 -11  -1  -4   -3.00    5.20 
  11  -1   4    9.30   10.20 
  11   1   4   -4.40   11.50 
  11   1   4    1.20   10.40 
  11   1   4    8.90    6.30 
 -11   1  -4   18.90   10.90 
 -11   1  -4    5.40    5.70 
  12  -1   4    1.30   11.20 
  12  -1   4    2.10   10.50 
 -12  -1  -4   13.30   11.20 
  12  -1   4   30.90   14.80 
 -12  -1  -4    2.00    6.70 
 -12  -1  -4   -4.40    9.40 
  12   1   4   20.60   13.10 
 -12   1  -4    1.50   10.80 
  12   1   4   -7.70    9.50 
 -12   1  -4    6.10    6.90 
 -13  -1  -4   12.80    9.90 
  13  -1   4    9.60   13.80 
 -13  -1  -4   43.00   12.80 
 -13  -1  -4   37.00   13.40 
  13  -1   4   23.50   16.50 
  13  -1   4   57.09   19.60 
  13   1   4   31.10   15.10 
 -13   1  -4   27.20   15.00 
 -13   1  -4   25.00   11.20 
  13   1   4   11.20   14.00 
  14  -1   4   66.49   17.80 
 -14  -1  -4   46.90   17.90 
  14  -1   4  -17.20   16.40 
  14  -1   4   18.30   13.70 
 -14  -1  -4   23.50   11.40 
 -14  -1  -4    0.20   13.20 
 -14   1  -4   -3.60    8.20 
 -14   1  -4   15.70   14.40 
  14   1   4   39.10   18.50 
  14   1   4  -15.20   15.50 
 -15  -1  -4    8.20   19.50 
 -15  -1  -4  -18.90   15.60 
  15  -1   4   15.20   13.60 
  15  -1   4   47.10   19.00 
  15  -1   4  -18.40   21.40 
 -15  -1  -4   -4.40   11.50 
 -15   1  -4   -5.90    9.70 
  15   1   4   -7.10   23.00 
 -15   1  -4    4.30   18.30 
  15   1   4  -10.70   18.80 
  16  -1   4   18.60   29.50 
 -16  -1  -4   59.39   21.20 
 -16  -1  -4   -3.00   14.10 
  16  -1   4   10.30   21.40 
  16   1   4  -11.70   19.40 
 -16   1  -4   -8.70   12.30 
  16  -2  -4   43.40   25.00 
 -16  -2   4  -14.00   15.80 
  16  -2  -4  -20.70   28.10 
  16  -2  -4   12.40   19.40 
 -16  -2   4   31.10   22.40 
 -16  -2   4  -15.00   16.20 
 -16   2   4  -11.60   14.30 
  16   2  -4   28.50   22.60 
  15  -2  -4    8.60   19.90 
 -15  -2   4   27.10   14.70 
 -15  -2   4    3.80   16.70 
 -15  -2   4   -0.70   13.20 
  15  -2  -4  -11.90   18.60 
  15   2  -4   52.49   22.40 
 -15   2   4    0.20   12.30 
 -15   2   4   -2.10   15.40 
  15   2  -4    1.60   18.30 
  14  -2  -4   -5.30   14.60 
 -14  -2   4   19.00   14.50 
 -14  -2   4    3.80   12.50 
 -14  -2   4    1.00   12.50 
  14  -2  -4   -8.30   18.90 
  14   2  -4   -0.40   15.60 
  14   2  -4  -38.70   19.50 
 -14   2   4   -1.50   12.10 
 -14   2   4    1.80   11.20 
  13  -2  -4   16.00   12.10 
 -13  -2   4   11.60   11.90 
 -13  -2   4    1.30   10.40 
 -13  -2   4    2.80   10.70 
  13  -2  -4   25.70   11.90 
  13  -2  -4  -13.90   15.30 
 -13   2   4   18.60    9.80 
  13   2  -4   -7.90   13.50 
 -12  -2   4    6.60    8.20 
  12  -2  -4    4.80   10.50 
  12  -2  -4    6.90   11.60 
  12  -2  -4   -8.40   13.60 
 -12  -2   4   -8.00   10.60 
 -12  -2   4    4.50    8.10 
  12   2  -4    0.30   13.60 
 -12   2   4   -1.30    8.20 
 -11  -2   4    0.40    9.10 
 -11  -2   4   11.70   10.10 
 -11  -2   4  -17.50    7.20 
  11  -2  -4    4.40   11.70 
  11  -2  -4   -8.20    8.40 
  11  -2  -4   -6.30   11.00 
  11   2  -4  -11.90   10.10 
 -11   2   4    0.00    9.40 
 -11   2   4    1.20    7.80 
  10  -2  -4   -2.20    7.80 
 -10  -2   4    3.00    7.00 
 -10  -2   4   21.00    8.60 
  10  -2  -4  -16.10   10.30 
 -10  -2   4    3.40    6.70 
  10  -2  -4   -9.00   10.30 
 -10   2   4    6.60    8.10 
  10   2  -4   -5.30    8.90 
  10   2  -4    9.20   11.10 
   9  -2  -4   13.00   11.10 
  -9  -2   4   14.40    7.00 
   9  -2  -4    9.90    8.60 
  -9  -2   4    6.60    8.00 
  -9  -2   4   21.10    8.50 
   9  -2  -4   10.40    9.70 
  -9   2   4   12.90    7.50 
   9   2  -4    6.10    7.70 
   9   2  -4   28.70   12.10 
   8  -2  -4   29.00   11.50 
  -8  -2   4   13.80    8.70 
   8  -2  -4   43.20   12.50 
  -8  -2   4   32.30    8.80 
  -8  -2   4   32.30    8.80 
   8   2  -4   29.90   10.50 
  -8   2   4   12.60    8.40 
  -8   2   4   20.90    8.60 
   8   2  -4   15.60    8.70 
  -7  -2   4    9.30    6.10 
   7  -2  -4    6.90    8.40 
   7  -2  -4    6.00    5.70 
   7  -2  -4   19.20    9.60 
  -7  -2   4   13.50    6.40 
  -7  -2   4   14.50    6.60 
   7   2  -4   10.80    6.00 
  -7   2   4    0.90    5.50 
   7   2  -4   12.70    6.70 
  -7   2   4   25.50    6.70 
   7   2  -4    8.70    8.80 
   6  -2  -4   87.39   18.60 
  -6  -2   4   76.49   16.50 
   6  -2  -4   51.19   16.20 
  -6  -2   4   85.59   16.70 
   6  -2  -4   90.89   17.70 
  -6  -2   4   60.99   16.80 
   6   2  -4   56.19   16.40 
   6   2  -4   69.09   16.10 
  -6   2   4   63.69   16.80 
   6   2  -4   80.99   18.70 
  -6   2   4   57.99   16.70 
  -6   2   4   69.09   16.60 
   5  -2  -4  259.67   63.59 
   5  -2  -4  301.07   64.09 
  -5  -2   4  288.37   63.69 
  -5  -2   4  265.77   63.79 
   5  -2  -4  310.97   64.39 
  -5  -2   4  325.07   63.69 
  -5   2   4  272.67   63.79 
   5   2  -4  305.97   63.69 
   5   2  -4  301.97   63.69 
   5   2  -4  342.17   64.49 
  -5   2   4  275.77   63.89 
  -5   2   4  316.87   63.59 
   4  -2  -4 1114.19  222.78 
   4  -2  -4  986.10  222.58 
  -4  -2   4 1012.50  222.48 
   4  -2  -4 1009.30  222.28 
  -4  -2   4  989.00  222.38 
  -4  -2   4 1123.19  222.28 
   4   2  -4 1110.69  222.48 
  -4   2   4 1022.70  222.48 
  -4   2   4 1002.70  222.28 
   4   2  -4 1009.40  222.28 
   4   2  -4 1112.09  222.88 
  -4   2   4 1045.00  222.68 
  -3  -2   4   56.59   13.80 
  -3  -2   4   52.09   13.40 
   3  -2  -4   55.99   12.90 
   3  -2  -4   45.40   14.30 
  -3  -2   4   68.99   13.50 
   3  -2  -4   80.49   15.10 
   3   2  -4   63.89   13.70 
  -3   2   4   52.59   13.10 
   3   2  -4   55.79   12.80 
  -3   2   4   46.20   13.90 
  -2  -2   4  164.68   35.20 
   2  -2  -4  156.08   35.40 
   2  -2  -4  180.08   35.80 
  -2  -2   4  167.68   34.80 
  -2  -2   4  146.89   35.00 
  -2   2   4  159.08   35.40 
   2   2  -4  160.08   35.10 
  -2   2   4  144.19   34.60 
   2   2  -4  193.38   35.90 
  -1  -2   4   32.90    9.50 
   1  -2  -4   38.50   11.10 
  -1  -2   4   51.59   10.70 
   1   2  -4   48.20   11.00 
   1   2  -4   38.40   10.00 
  -1   2   4   27.50    8.70 
  -1   2   4   53.59   11.70 
   0  -2   4  207.28   43.00 
   0  -2  -4  198.58   43.40 
   0  -2   4  196.28   43.30 
   0  -2   4  198.68   43.30 
   0   2   4  202.08   43.40 
   0   2  -4  197.38   43.60 
   1  -2   4   35.00   10.50 
   1  -2   4   45.10   10.20 
  -1  -2  -4   44.30   10.60 
  -1  -2  -4   47.70   10.70 
   1  -2   4   33.10   10.00 
  -1   2  -4   51.79   10.70 
   1   2   4   32.80   10.20 
  -1   2  -4   48.80   11.20 
   1   2   4   42.00    9.80 
  -2  -2  -4    8.80    5.60 
  -2  -2  -4   17.00    6.00 
  -2  -2  -4   12.50    3.90 
   2  -2   4   14.60    5.70 
   2  -2   4   13.20    5.70 
   2   2   4    2.00    3.60 
  -2   2  -4   11.20    4.80 
   2   2   4    9.20    5.60 
   2   2   4    8.30    4.50 
  -2   2  -4   14.00    6.40 
   3  -2   4    7.80    5.00 
  -3  -2  -4    5.00    3.60 
  -3  -2  -4   13.80    6.10 
   3  -2   4    2.30    3.80 
  -3   2  -4    4.40    3.20 
   3   2   4    1.90    4.60 
   3   2   4   10.60    5.10 
   3   2   4    5.70    4.90 
  -3   2  -4    1.80    3.70 
  -3   2  -4   11.70    7.00 
  -4  -2  -4   20.80    8.20 
  -4  -2  -4   45.80   10.60 
   4  -2   4   33.50   10.20 
   4   2   4   22.90    9.60 
  -4   2  -4   30.10    8.10 
   4   2   4   48.20   10.30 
  -4   2  -4   34.80    9.00 
   4   2   4   44.80    9.40 
  -5  -2  -4    0.40    3.50 
   5  -2   4   10.70    6.60 
  -5  -2  -4    6.00    6.30 
   5  -2   4    3.80    5.00 
  -5   2  -4   27.10    8.80 
   5   2   4    3.80    5.50 
   5   2   4    4.50    6.00 
  -5   2  -4    2.50    3.70 
   5   2   4    5.70    4.50 
   6  -2   4    6.80    6.70 
   6  -2   4   25.70    8.30 
  -6  -2  -4   23.70    8.00 
  -6  -2  -4   10.60    5.40 
   6   2   4   16.20    5.50 
  -6   2  -4   33.90    9.00 
   6   2   4   19.60    8.00 
  -6   2  -4   15.50    5.80 
   6   2   4    7.60    6.80 
   7  -2   4   49.30   11.20 
  -7  -2  -4   41.20   10.50 
  -7  -2  -4   25.40    8.10 
   7  -2   4   14.50    8.80 
   7   2   4   23.20   10.20 
  -7   2  -4   25.00    8.10 
  -8  -2  -4   86.59   17.00 
  -8  -2  -4   43.10   15.50 
   8  -2   4   86.69   17.80 
  -8   2  -4   53.99   15.70 
   8   2   4   53.29   17.30 
  -8   2  -4  107.89   24.30 
   9  -2   4   50.79   19.10 
  -9  -2  -4   38.90   12.80 
  -9  -2  -4   55.09   13.10 
   9  -2   4   63.59   14.30 
  -9  -2  -4    3.50   13.30 
  -9   2  -4   53.09   13.50 
  -9   2  -4   25.00   10.90 
   9   2   4   30.50   12.50 
   9   2   4   32.40   13.00 
 -10  -2  -4    5.40    6.60 
  10  -2   4   28.50   16.10 
  10  -2   4    8.20   11.10 
 -10  -2  -4   -2.10   12.80 
 -10  -2  -4   23.20    9.80 
  10  -2   4   15.30   11.20 
 -10   2  -4   14.50   17.00 
 -10   2  -4   20.90    7.00 
  10   2   4   10.90   10.20 
  11  -2   4   93.59   20.70 
  11  -2   4   48.40   18.30 
 -11  -2  -4   97.19   19.20 
 -11  -2  -4   55.69   17.00 
  11   2   4   52.19   19.20 
 -11   2  -4   56.49   17.40 
 -12  -2  -4   10.60    9.00 
  12  -2   4   30.80   18.00 
  12  -2   4    7.40   12.80 
  12  -2   4   19.50   15.80 
  12   2   4   -4.10   12.70 
 -12   2  -4    6.20    7.40 
 -13  -2  -4   24.30   14.00 
 -13  -2  -4   11.90   13.40 
  13  -2   4   66.99   20.30 
  13  -2   4   23.30   17.30 
  13  -2   4   28.60   14.60 
 -13  -2  -4    5.00    9.60 
  13   2   4   48.40   17.90 
  13   2   4   22.40   16.50 
 -13   2  -4    0.60    8.80 
 -13   2  -4  -10.70   14.80 
 -14  -2  -4   18.40   19.10 
 -14  -2  -4    2.80    9.50 
 -14  -2  -4   21.20   15.90 
  14  -2   4    5.00   16.20 
  14  -2   4    7.40   18.20 
 -14   2  -4    6.10   11.60 
  14   2   4   -0.60   19.80 
 -14   2  -4   32.50   16.10 
  14   2   4    3.40   16.80 
  15  -2   4    2.20   23.10 
  15  -2   4   40.60   25.20 
 -15  -2  -4   13.50   17.20 
  15  -2   4   23.00   18.10 
 -15  -2  -4   -8.20   11.50 
 -15   2  -4    6.60   11.70 
  15   2   4   10.90   20.50 
  15  -3  -4   32.90   26.90 
  15  -3  -4    3.50   30.20 
 -15  -3   4   61.39   23.00 
 -15  -3   4    9.20   16.40 
  15  -3  -4   60.59   22.40 
 -15   3   4   10.90   15.80 
  15   3  -4   -0.10   23.10 
 -14  -3   4   -9.30   14.10 
  14  -3  -4   44.10   19.10 
 -14  -3   4   -4.40   13.10 
  14  -3  -4  -39.60   22.00 
 -14  -3   4   31.10   19.50 
  14  -3  -4   18.80   16.70 
  14   3  -4   29.90   19.30 
 -14   3   4    5.20   14.60 
  14   3  -4   -1.30   24.30 
 -14   3   4   23.40   13.90 
  13  -3  -4   48.20   16.90 
 -13  -3   4    5.60   11.90 
  13  -3  -4   15.90   20.60 
 -13  -3   4   31.20   13.70 
  13  -3  -4    0.50   14.20 
 -13  -3   4   10.90   15.00 
  13   3  -4   69.39   24.10 
  13   3  -4    4.30   16.00 
 -13   3   4    1.20   12.70 
 -13   3   4   13.80   12.20 
  12  -3  -4  -17.30   17.10 
 -12  -3   4   16.50   10.50 
 -12  -3   4   -6.80   10.10 
  12  -3  -4    7.00   11.90 
 -12   3   4    6.90   10.20 
  12   3  -4    5.00   17.80 
  12   3  -4  -19.20   14.60 
 -12   3   4   -0.10   10.60 
  11  -3  -4  -14.40   14.20 
 -11  -3   4    6.80    8.80 
 -11  -3   4   15.50   11.60 
 -11  -3   4   19.70    9.60 
  11  -3  -4    0.10   10.70 
  11   3  -4   17.10   12.90 
 -11   3   4    5.30    9.20 
  10  -3  -4   -3.60   12.80 
  10  -3  -4  -11.10    9.40 
 -10  -3   4   22.10   10.30 
 -10  -3   4   12.60    7.90 
  10  -3  -4   46.60   14.10 
 -10  -3   4   12.80    9.60 
 -10   3   4    1.70    8.50 
 -10   3   4   24.10    8.50 
  10   3  -4    1.30   11.00 
  10   3  -4   20.30   13.50 
   9  -3  -4  127.69   35.30 
  -9  -3   4  114.29   34.10 
  -9  -3   4  166.18   33.80 
   9  -3  -4  185.58   35.10 
  -9  -3   4  165.38   33.80 
   9   3  -4  162.08   36.00 
  -9   3   4  154.48   33.60 
   9   3  -4  128.49   35.30 
  -9   3   4  123.59   33.90 
  -8  -3   4   81.39   17.40 
  -8  -3   4   54.49   17.60 
   8  -3  -4   73.79   19.40 
  -8  -3   4   86.29   18.20 
   8  -3  -4   96.59   21.50 
   8  -3  -4   44.60   17.40 
  -8   3   4   73.59   17.30 
  -8   3   4   50.19   17.40 
   8   3  -4   57.79   19.10 
   8   3  -4   63.99   18.20 
  -7  -3   4   17.70    6.60 
  -7  -3   4    0.60    6.60 
  -7  -3   4    7.50    7.00 
   7  -3  -4    6.40    6.90 
   7  -3  -4   -1.40   11.20 
  -7  -3   4    6.90    5.80 
   7  -3  -4    0.70    9.50 
  -7   3   4   14.30    6.30 
   7   3  -4    5.60    7.50 
  -7   3   4   12.40    6.60 
   7   3  -4   16.50    9.90 
   6  -3  -4    2.50    8.40 
  -6  -3   4   -2.70    6.50 
  -6  -3   4    9.60    6.50 
  -6  -3   4   21.60    6.00 
   6  -3  -4    0.60    5.50 
  -6  -3   4    6.20    6.40 
   6   3  -4   -2.30    9.30 
  -6   3   4    5.40    5.20 
  -6   3   4    0.70    5.00 
   6   3  -4    3.70    6.40 
   5  -3  -4   -4.40    5.00 
  -5  -3   4    0.60    6.20 
  -5  -3   4    5.70    6.80 
   5  -3  -4    1.70    5.10 
  -5  -3   4   -1.20    4.30 
   5  -3  -4    3.60    8.70 
  -5  -3   4   -2.60    5.10 
  -5   3   4    9.40    4.50 
  -5   3   4    0.80    4.10 
   5   3  -4   -3.70    4.50 
   5   3  -4   -1.50    7.90 
   5   3  -4    1.00    5.10 
   4  -3  -4    5.60    5.00 
  -4  -3   4   17.80    7.10 
  -4  -3   4   14.10    5.20 
  -4  -3   4   29.10    9.40 
   4  -3  -4    7.30    6.20 
   4  -3  -4   18.30   10.50 
  -4  -3   4    4.10    5.70 
   4   3  -4    5.50    5.60 
  -4   3   4   11.50    4.60 
   4   3  -4   21.40    9.00 
  -3  -3   4   30.00    9.60 
   3  -3  -4   50.09   10.60 
  -3  -3   4   52.39   11.30 
   3  -3  -4   31.10   12.60 
   3   3  -4   31.90   10.60 
   2  -3  -4   16.70    6.20 
  -2  -3   4    3.60    5.60 
   2  -3  -4   -6.00    7.30 
  -2   3   4    2.90    8.50 
   2   3  -4    6.40    5.60 
  -1  -3   4  207.18   45.20 
   1  -3  -4  203.58   45.40 
   1  -3  -4  230.98   45.20 
  -1   3   4  192.78   45.50 
   1   3  -4  206.48   45.20 
   0  -3  -4  157.48   33.20 
   0  -3   4  155.28   33.00 
   0  -3  -4  189.08   33.40 
   0   3  -4  121.99   32.80 
   0   3   4  136.29   33.20 
  -1  -3  -4   -3.60    6.50 
   1  -3   4   -5.00    4.90 
  -1  -3  -4    9.50    7.00 
   1   3   4    4.10    5.90 
  -1   3  -4    2.40    4.60 
  -2  -3  -4   10.40    8.10 
   2  -3   4   12.30    6.20 
  -2  -3  -4   26.20    7.80 
   2   3   4    8.70    7.10 
  -2   3  -4   10.60    9.50 
  -2   3  -4   28.30    7.10 
  -3  -3  -4    1.50    5.80 
   3  -3   4   -3.90    4.30 
   3  -3   4    3.60    5.20 
  -3  -3  -4    2.80    2.50 
   3  -3   4   -0.50    4.50 
  -3  -3  -4   -1.40    7.50 
   3   3   4   -5.50    5.20 
  -3   3  -4    3.60    4.70 
   3   3   4    0.30    5.70 
  -3   3  -4   11.40    6.50 
   4  -3   4    2.00    5.20 
  -4  -3  -4   -0.40    3.60 
   4  -3   4    1.20    5.50 
  -4  -3  -4    6.40    7.00 
  -4  -3  -4    3.10    4.90 
   4   3   4    5.70    5.50 
   4   3   4    3.60    5.80 
  -4   3  -4    5.90    4.80 
   4   3   4    5.40    6.00 
  -4   3  -4    3.70    6.50 
  -4   3  -4    5.90    3.50 
  -5  -3  -4    8.00    9.50 
  -5  -3  -4    5.40    4.40 
  -5  -3  -4   18.20    6.40 
   5  -3   4   -0.30    6.80 
   5  -3   4   17.50    6.80 
  -5   3  -4   13.00    7.40 
   5   3   4    5.30    6.40 
  -5   3  -4    3.90    4.20 
  -5   3  -4   11.10    5.60 
   5   3   4    7.10    7.20 
   5   3   4    4.30    7.00 
  -6  -3  -4   -0.80    8.90 
   6  -3   4    1.30    7.20 
  -6  -3  -4   -0.70    4.60 
   6  -3   4    3.60   11.90 
  -6  -3  -4   12.00    6.80 
   6  -3   4   17.70    7.80 
  -6   3  -4    5.00    5.80 
  -6   3  -4    1.60    7.50 
  -6   3  -4    6.10    4.80 
   6   3   4    2.60    7.50 
   6   3   4   10.10    7.80 
   7  -3   4   91.39   22.80 
   7  -3   4   99.79   20.40 
   7  -3   4   68.09   20.20 
  -7  -3  -4   86.29   18.60 
   7   3   4   60.69   20.60 
  -7   3  -4   65.99   18.70 
  -8  -3  -4  332.77   68.29 
   8  -3   4  294.67   68.69 
  -8  -3  -4  326.77   68.69 
   8  -3   4  372.06   69.79 
   8   3   4  357.96   68.99 
  -8   3  -4  345.17   68.89 
   8   3   4  258.87   68.89 
  -8   3  -4  245.28   67.89 
   9  -3   4    8.10   10.50 
  -9  -3  -4   -7.80    8.70 
  -9  -3  -4    5.40    6.50 
   9  -3   4    6.80   10.20 
   9  -3   4   18.60   18.40 
   9   3   4    2.70    9.90 
   9   3   4    2.40   11.50 
  -9   3  -4    8.10    6.70 
  -9   3  -4    1.40    8.80 
 -10  -3  -4    6.70   12.90 
 -10  -3  -4   12.70    7.60 
 -10  -3  -4   17.50   10.90 
  10  -3   4   14.70   11.50 
  10  -3   4   -1.80   12.50 
  10   3   4   21.10   12.50 
 -10   3  -4    3.20    7.50 
 -11  -3  -4   -7.40    7.50 
  11  -3   4   -5.00   12.60 
  11  -3   4  -23.40   13.60 
 -11  -3  -4    9.40   10.20 
 -11   3  -4   -3.50   10.70 
 -11   3  -4  -16.10    7.60 
  11   3   4    8.60   14.30 
  11   3   4  -11.80   14.70 
 -12  -3  -4   17.40   16.10 
  12  -3   4   46.30   23.70 
  12  -3   4   10.00   13.80 
 -12  -3  -4    1.00    8.40 
 -12  -3  -4    8.60   12.30 
  12  -3   4  -26.70   16.60 
 -12   3  -4    1.70    8.80 
 -12   3  -4    6.10   14.30 
  12   3   4   -1.90   15.70 
  12   3   4    7.30   15.10 
  13  -3   4   16.00   20.30 
 -13  -3  -4   10.00   17.80 
  13  -3   4   36.90   27.80 
  13  -3   4   -4.00   15.40 
 -13  -3  -4   -4.60   18.90 
 -13  -3  -4    5.10   11.10 
 -13   3  -4    6.60   11.30 
 -13   3  -4   -0.30   17.00 
  13   3   4  -10.50   21.70 
  13   3   4  -19.40   24.40 
 -14  -3  -4   11.10   25.60 
 -14  -3  -4   17.50   15.60 
  14  -3   4    2.40   19.30 
  14  -3   4   99.09   32.10 
 -14  -3  -4   45.20   19.40 
  14  -3   4   19.10   23.80 
 -14   3  -4   -5.30   13.60 
  14   3   4   12.30   23.80 
 -13  -4   4   40.80   22.00 
 -13  -4   4   12.70   14.30 
 -13  -4   4   -0.70   15.80 
  13  -4  -4   -7.30   30.00 
  13  -4  -4   -0.70   18.30 
 -13   4   4   17.90   14.00 
  13   4  -4  -29.10   21.40 
 -12  -4   4    1.00   13.40 
 -12  -4   4   34.40   13.60 
  12  -4  -4   35.60   23.50 
  12  -4  -4   -3.20   16.90 
 -12  -4   4   84.89   17.10 
 -12   4   4   28.10   13.10 
  12   4  -4   -2.90   25.40 
  12   4  -4   32.00   20.10 
 -12   4   4   -8.10   13.70 
  11  -4  -4   25.70   20.10 
 -11  -4   4    8.10   10.90 
 -11  -4   4   47.60   14.10 
  11  -4  -4  -21.20   13.40 
 -11  -4   4   -2.20   10.80 
  11   4  -4    0.00   22.10 
 -11   4   4   10.20   11.80 
 -11   4   4   -5.10   10.80 
  11   4  -4  -31.60   15.70 
 -10  -4   4   30.80    9.80 
 -10  -4   4   -2.60    9.50 
 -10  -4   4    7.30   11.60 
  10  -4  -4   21.80   17.70 
  10   4  -4    3.00   18.80 
 -10   4   4    7.20   10.00 
  10   4  -4    3.80   14.50 
   9  -4  -4   40.60   17.10 
   9  -4  -4   -8.30   10.10 
  -9  -4   4   13.50    8.70 
   9  -4  -4  -11.70   15.40 
  -9  -4   4   -2.00    8.80 
  -9  -4   4   21.00    9.30 
  -9   4   4   13.00    9.00 
  -9   4   4   -5.90    8.10 
   9   4  -4   -4.10   12.50 
   8  -4  -4   -2.30   12.70 
  -8  -4   4   12.10    8.40 
  -8  -4   4   23.50    6.80 
  -8  -4   4   22.60    8.70 
   8   4  -4   -5.20   11.20 
  -8   4   4   12.90    7.80 
   8   4  -4  -22.60   14.30 
  -8   4   4   15.40    8.00 
   7  -4  -4    4.90    7.80 
  -7  -4   4   24.60    7.80 
  -7  -4   4   -7.00    7.60 
  -7  -4   4   -1.60    6.40 
  -7   4   4    3.00    6.60 
   7   4  -4  -13.20   12.40 
  -7   4   4   14.10    6.20 
   7   4  -4   -1.70    8.90 
  -6  -4   4    1.20    6.40 
  -6  -4   4   -2.50    8.80 
   6  -4  -4   -0.90    7.30 
  -6  -4   4   -1.10    5.40 
   6   4  -4  -16.90    7.10 
  -5  -4   4  -14.30    9.20 
   5  -4  -4   -1.40   12.90 
   5  -4  -4    5.90    7.90 
   5   4  -4   -5.20   11.20 
  -4  -4   4   -9.30   10.60 
   4  -4  -4  -23.00   12.10 
   4  -4  -4    1.30    8.10 
  -4  -4   4   -0.70    7.40 
   3  -4  -4    1.70    8.00 
  -3  -4   4   -2.30    7.00 
  -3  -4   4   -0.40   11.60 
   3  -4  -4    3.00   11.80 
   2  -4  -4   33.80   11.90 
   2  -4  -4   29.80   14.70 
  -2  -4   4   37.30   12.20 
  -2  -4   4   58.79   16.80 
  -1  -4   4   10.40    7.80 
   1  -4  -4   12.70    9.10 
  -1  -4   4   23.50   13.30 
   1  -4  -4   15.90   20.50 
   1   4  -4    0.70    7.50 
   0  -4   4  -11.90    7.90 
   0  -4   4   -1.80   12.30 
   0  -4  -4   11.00    9.50 
   0   4  -4    5.40    6.90 
  -1  -4  -4   27.30   10.90 
   1  -4   4   14.00   13.70 
  -1  -4  -4    5.10   10.00 
  -1   4  -4    9.80    7.30 
  -2  -4  -4   16.70   11.70 
   2  -4   4   14.50   14.60 
   2  -4   4   11.30    8.00 
  -2  -4  -4   38.40   10.80 
  -2   4  -4   13.10    8.00 
   3  -4   4   50.39   13.80 
  -3  -4  -4   60.99   15.30 
   3  -4   4  101.59   22.40 
  -3  -4  -4   53.49   16.50 
  -3   4  -4   33.10   13.80 
   4  -4   4  204.38   44.20 
  -4  -4  -4  160.68   40.40 
  -4  -4  -4  228.78   42.30 
   5   4   4  157.48   30.30 
  -5   4  -4  109.29   29.30 
  -6  -4  -4   16.10    6.80 
   6  -4   4    2.00    8.90 
  -6  -4  -4    4.30    5.10 
   6  -4   4   19.00    8.80 
  -6   4  -4    7.60    7.50 
   6   4   4   13.90   10.10 
  -6   4  -4    7.80    5.40 
   6   4   4    5.00    9.40 
  -7  -4  -4   21.50    8.90 
  -7  -4  -4   13.90    6.90 
   7  -4   4    9.40   10.80 
   7  -4   4   21.40   11.10 
   7   4   4   14.50   11.60 
  -7   4  -4   15.30    7.50 
  -7   4  -4   31.80   10.30 
   7   4   4   23.80   12.10 
  -8  -4  -4  -18.00   11.90 
   8  -4   4    1.20   11.80 
   8  -4   4   -3.70   11.50 
  -8  -4  -4    5.10    6.30 
  -8  -4  -4   -7.20    8.10 
   8   4   4    4.90   12.30 
  -8   4  -4   -2.10    9.30 
   8   4   4  -16.40   12.90 
  -8   4  -4   -0.80    7.30 
  -9  -4  -4    7.10    7.30 
   9  -4   4   30.10   13.50 
   9  -4   4   40.50   25.40 
  -9  -4  -4    2.40    9.90 
   9  -4   4   15.00   13.80 
  -9  -4  -4    5.80   14.70 
   9   4   4  -13.10   13.80 
  -9   4  -4   -9.00    8.50 
 -10  -4  -4    0.90    8.30 
 -10  -4  -4    2.00   16.40 
  10  -4   4    6.90   16.10 
  10  -4   4   -1.00   15.20 
  10  -4   4   50.19   28.40 
  10   4   4    7.20   18.20 
 -10   4  -4   -9.20   12.20 
 -10   4  -4   21.40   10.00 
  10   4   4   22.20   15.90 
 -11  -4  -4   23.80   12.70 
  11  -4   4   -6.10   17.50 
  11  -4   4   81.19   32.30 
 -11  -4  -4   11.60   19.10 
 -11  -4  -4  -16.60   10.00 
  11  -4   4    7.40   17.70 
  11   4   4  -15.60   17.80 
 -11   4  -4   10.40   11.00 
 -11   4  -4    0.10   14.60 
  11   4   4   29.10   21.20 
 -12  -4  -4  -29.70   15.20 
 -12  -4  -4   -1.50   11.10 
  12  -4   4   61.39   22.30 
  12  -4   4    0.90   20.20 
 -12   4  -4    1.80   26.70 
 -12   4  -4    5.10   12.60 
  12   4   4  -32.70   21.50 
 -10  -5   4   27.20   12.20 
 -10   5   4   -3.00   13.00 
  -9  -5   4   18.10    9.40 
  -9  -5   4   -9.60   16.70 
   9   5  -4  -19.90   15.00 
   9   5  -4  -28.50   24.10 
   7  -5  -4  -11.60   10.20 
  -7  -5   4    4.40   11.10 
   7   5  -4   -0.70   18.30 
   7   5  -4   14.00   12.00 
   6  -5  -4    4.40   19.60 
   6  -5  -4   12.60   11.00 
  -6  -5   4   -1.00   10.60 
  -6  -5   4    5.20   11.80 
  -5  -5   4    6.80   12.80 
   5  -5  -4   49.80   18.60 
  -5  -5   4   -8.60   10.30 
   5  -5  -4   11.00   11.30 
  -4  -5   4   16.40   11.90 
   4  -5  -4   32.10   12.80 
   4  -5  -4   35.70   18.70 
  -4  -5   4   33.00   18.10 
  -3  -5   4   -7.80   10.90 
   3  -5  -4   15.30   11.20 
  -3  -5   4   -7.50   14.80 
   3  -5  -4   44.10   16.90 
  -2  -5   4  -20.80   15.10 
   2  -5  -4   -1.30   11.60 
  -2  -5   4   -5.10    9.80 
   2  -5  -4    7.40   14.90 
  -1  -5   4   -3.50    9.70 
  -1  -5   4   -6.10   16.10 
   1  -5  -4   20.20   14.30 
   1  -5  -4  -14.60   12.20 
   0  -5   4   75.19   20.00 
   0  -5  -4   60.09   21.70 
   0  -5  -4   88.29   21.50 
   1  -5   4   97.79   23.60 
  -1  -5  -4   72.99   24.70 
  -1  -5  -4  109.19   24.80 
   2  -5   4   -7.30    8.80 
  -2  -5  -4    0.00   12.90 
  -2  -5  -4    4.80   11.40 
   2  -5   4   27.20   19.60 
  -3  -5  -4   45.80   18.50 
   3  -5   4   57.69   26.10 
  -3  -5  -4   60.59   16.90 
   4  -5   4   61.09   24.30 
  -4  -5  -4   -6.60   14.40 
   5  -5   4   67.69   27.30 
  -5  -5  -4   22.10   17.00 
   6  -5   4   25.30   29.40 
  -6  -5  -4   26.90   16.70 
  -7  -5  -4    7.90   17.60 
   7  -5   4    9.30   29.90 
   7   5   4    0.20   15.00 
   7   5   4   17.60   15.50 
   8   5   4  -28.50   17.10 
   8   5   4   11.20   22.20 
  -9  -5  -4    8.50    8.80 
  -9   5  -4   20.40   13.70 
   9   5   4   29.10   23.10 
  -4  -6   4   -3.00   19.50 
   4  -6  -4    1.40   17.80 
  -3  -6   4   61.39   23.00 
   3  -6  -4   13.60   19.90 
   2  -6  -4   66.49   25.10 
  -2  -6   4   74.29   23.90 
  -2  -6   4  -12.80   19.90 
   2  -6  -4   37.60   20.10 
   1  -6  -4   22.80   21.00 
   1  -6  -4   44.90   25.70 
  -1  -6   4   40.30   18.10 
   0  -6  -4   26.20   19.70 
   0  -6  -4   13.30   19.90 
   0  -6   4  -20.70   18.10 
   1  -6   4   15.10   16.40 
  -1  -6  -4   67.89   22.20 
   1  -6   4   23.00   28.30 
   2  -6   4  -34.20   13.60 
  -2  -6  -4   17.90   16.70 
   2  -6   4   -0.90   31.70 
 -17   0   5   28.20   17.70 
  17   0  -5   -8.50   22.40 
  17   0  -5  -12.20   26.70 
 -16   0   5    9.30   12.50 
  16   0  -5   14.50   21.70 
 -16   0   5    6.70   14.10 
  16   0  -5   -3.30   15.50 
 -15   0   5    8.60   11.30 
  15   0  -5    0.80   18.50 
  15   0  -5   -3.70   16.10 
 -15   0   5   10.50   12.40 
  14   0  -5    5.00   11.60 
  14   0  -5   -3.70   15.00 
 -14   0   5    3.20   11.70 
 -14   0   5   12.00   13.60 
 -13   0   5   11.10    9.60 
  13   0  -5   10.00   15.20 
  13   0  -5   -6.20    9.30 
  12   0  -5    2.10    9.50 
 -12   0   5    1.10    8.30 
  12   0  -5   16.00   20.10 
  11   0  -5    3.90    7.40 
  11   0  -5    4.20    5.70 
  11   0  -5    5.80    9.40 
 -11   0   5    2.60    7.30 
  10   0  -5    8.80    9.20 
  10   0  -5    0.50    5.70 
 -10   0   5    0.20    6.90 
 -10   0   5   13.80    6.60 
   9   0  -5   18.70    9.60 
   9   0  -5   29.50    6.50 
  -9   0   5   20.70    7.60 
   9   0  -5    9.20    7.30 
  -9   0   5    7.80    6.70 
   8   0  -5   18.90   11.40 
  -8   0   5   39.70   10.30 
  -8   0   5   16.10    9.20 
  -8   0   5   31.00    8.80 
   7   0  -5   14.50    5.10 
   7   0  -5   -0.60    4.00 
  -7   0   5    6.20    6.20 
  -7   0   5    1.90    4.80 
   7   0  -5    5.60    8.70 
  -7   0   5    2.20    4.90 
  -6   0   5    8.90    5.70 
  -6   0   5    8.50    5.20 
   6   0  -5    4.70    3.80 
   6   0  -5    9.80    9.40 
  -6   0   5    1.30    4.80 
   6   0  -5    5.70    4.20 
  -5   0   5    1.60    5.00 
  -5   0   5   -2.90    4.80 
   5   0  -5    3.40    4.10 
   5   0  -5   -0.80    7.30 
   5   0  -5   -2.60    2.90 
  -5   0   5    1.90    4.10 
   4   0  -5    3.60    3.10 
  -4   0   5   -3.60    4.00 
  -4   0   5   -1.00    4.20 
  -4   0   5   -1.90    5.30 
   4   0  -5   -1.70    8.40 
   4   0  -5   -1.70    3.20 
  -3   0   5    1.10    4.60 
   3   0  -5    5.60    9.40 
   3   0  -5    0.00    3.90 
  -3   0   5    2.10    5.30 
   2   0  -5   -0.60    7.30 
  -2   0   5    2.00    4.20 
   2   0  -5    4.30    4.10 
  -2   0   5    2.60    5.50 
   1   0  -5    2.50    3.50 
  -1   0   5   -1.20    3.90 
  -1   0   5   -6.50    6.00 
   1   0  -5    5.10    7.00 
   0   0  -5    4.40    7.20 
   0   0  -5    0.40    2.90 
   0   0   5    7.30    4.10 
   0   0   5   -3.50    7.10 
  -1   0  -5    1.80    6.00 
   1   0   5   -1.30    4.30 
  -1   0  -5    0.60    3.20 
   1   0   5    6.50    5.70 
   2   0   5   -2.80    4.80 
  -2   0  -5   -2.50    3.40 
   2   0   5    3.00    5.80 
  -2   0  -5   -4.10    7.70 
  -3   0  -5    0.50    3.40 
  -3   0  -5    3.90    7.60 
   3   0   5   -2.50    5.20 
   3   0   5   -1.70    6.00 
   4   0   5   -3.40    5.90 
   4   0   5   -0.60    4.60 
  -4   0  -5    3.80    8.30 
  -4   0  -5    3.60    4.20 
   5   0   5    8.50    6.10 
   5   0   5    8.10    6.10 
  -5   0  -5    4.70    4.70 
  -5   0  -5    7.50    7.30 
   6   0   5   11.10    6.30 
  -6   0  -5   12.60    7.60 
  -6   0  -5    5.20    4.50 
   6   0   5    7.20    5.50 
  -7   0  -5    4.00    9.00 
  -7   0  -5   -1.40    3.70 
   7   0   5    1.90    7.40 
   7   0   5   -0.70    4.80 
   8   0   5    1.80    7.30 
  -8   0  -5    5.90    8.10 
   8   0   5   -2.10    7.10 
  -8   0  -5    3.70    5.50 
   9   0   5   -1.90    5.90 
  -9   0  -5   -0.10    9.60 
   9   0   5   -8.30    8.10 
  -9   0  -5    6.90    5.10 
  10   0   5  -22.10   16.60 
 -10   0  -5    0.70    4.80 
  10   0   5    5.50    7.60 
  11   0   5  -18.10    9.10 
  11   0   5    8.20    9.20 
 -11   0  -5    8.20   10.00 
 -11   0  -5    0.40    5.90 
  12   0   5   37.80   12.10 
 -12   0  -5   14.20   11.00 
 -12   0  -5   -5.80    5.70 
  12   0   5    1.90    9.60 
  12   0   5    5.10   12.10 
 -13   0  -5    5.80    9.40 
  13   0   5    5.10   13.60 
  13   0   5    3.30   24.60 
 -13   0  -5  -26.90   10.50 
 -14   0  -5    4.50    8.20 
 -14   0  -5    6.40   13.20 
  14   0   5   13.80   16.70 
  14   0   5    1.20   12.00 
  15   0   5   36.20   25.20 
  15   0   5    2.10   14.00 
 -15   0  -5    2.30    9.50 
 -15   0  -5   -2.70   17.30 
  15   0   5   18.20   13.90 
  16   0   5   45.20   19.60 
 -16   0  -5    3.80   11.80 
  16   0   5   31.70   19.30 
  16   0   5    1.60   28.80 
 -17  -1   5   27.90   16.60 
  17  -1  -5   36.70   29.20 
 -17  -1   5   41.40   25.40 
 -17   1   5   -6.70   14.90 
  17   1  -5    7.40   20.60 
 -16  -1   5   10.80   12.70 
  16  -1  -5   39.70   23.60 
 -16  -1   5    9.30   14.30 
  16  -1  -5    9.80   15.60 
  16   1  -5    1.50   21.00 
  16   1  -5    1.40   27.00 
 -16   1   5   11.70   13.60 
 -16   1   5   -4.80   14.60 
  15  -1  -5  -25.10   16.10 
 -15  -1   5  -16.30   12.50 
 -15  -1   5   22.40   15.00 
  15  -1  -5   22.40   18.50 
  15   1  -5   32.60   19.10 
 -15   1   5    7.10   11.90 
 -15   1   5   39.10   13.20 
  15   1  -5    8.70   15.50 
  14  -1  -5    9.90   16.50 
  14  -1  -5   12.20   11.40 
 -14  -1   5    8.00   10.10 
 -14  -1   5   10.10    9.40 
  14  -1  -5    0.90    9.30 
 -14   1   5   24.00   12.60 
  14   1  -5   -4.40   11.20 
  14   1  -5   29.40   18.40 
 -14   1   5  -21.70   12.30 
  13  -1  -5    9.10   14.90 
 -13  -1   5  -10.20    9.50 
 -13  -1   5    1.60    8.50 
  13  -1  -5    7.50    9.20 
  13  -1  -5   15.00   11.10 
 -13  -1   5    3.90    8.70 
 -13   1   5    6.00    9.20 
  13   1  -5    0.10   10.30 
 -13   1   5   10.40   10.80 
  13   1  -5   -3.10   13.90 
  12  -1  -5   54.89   17.30 
  12  -1  -5   62.29   18.90 
 -12  -1   5   57.79   17.60 
  12  -1  -5   68.59   14.70 
 -12  -1   5   33.20   14.80 
  12   1  -5   29.30   15.80 
  12   1  -5   81.79   20.00 
 -12   1   5   35.10   15.20 
 -12   1   5   70.89   16.20 
 -11  -1   5   21.90   13.40 
  11  -1  -5   19.90    8.90 
  11  -1  -5   30.40   13.40 
 -11  -1   5    7.30    8.20 
  11  -1  -5   -6.20    7.90 
 -11  -1   5    8.70    7.60 
 -11   1   5    0.70    7.00 
  11   1  -5   19.40   11.30 
  11   1  -5    1.20    8.80 
 -11   1   5   12.80    8.10 
 -10  -1   5   -2.50    6.00 
  10  -1  -5    1.10    7.40 
  10  -1  -5   -1.40    7.00 
 -10  -1   5    5.90    6.60 
 -10  -1   5   -3.70    7.50 
  10  -1  -5    0.30    9.20 
  10   1  -5   -0.90    5.50 
 -10   1   5    4.10    7.50 
  10   1  -5   27.40   13.30 
  -9  -1   5   35.10    8.00 
  -9  -1   5   23.10    8.20 
   9  -1  -5   11.90    8.10 
  -9  -1   5   17.10    8.50 
   9  -1  -5   23.70    9.50 
   9  -1  -5   20.20    9.70 
  -9   1   5   13.10    8.10 
   9   1  -5   14.90   10.20 
  -9   1   5   36.60    9.20 
  -8  -1   5    9.60    5.50 
   8  -1  -5    6.60    6.50 
  -8  -1   5   -4.40    5.10 
   8  -1  -5   -3.10    6.60 
  -8  -1   5    0.30    4.80 
   8  -1  -5    8.70    7.50 
   8   1  -5    2.20    4.20 
  -8   1   5   11.30    7.00 
  -8   1   5   -1.00    5.60 
  -8   1   5   -1.20    9.50 
   8   1  -5   -0.50    7.90 
   8   1  -5    0.30    3.90 
   7  -1  -5  126.39   33.00 
   7  -1  -5  156.18   34.30 
  -7  -1   5  122.49   33.30 
  -7  -1   5  169.18   33.30 
  -7  -1   5  155.68   32.90 
  -7  -1   5  142.89   32.20 
   7  -1  -5  170.18   33.20 
  -7   1   5  165.08   33.30 
  -7   1   5  133.19   33.30 
   7   1  -5  148.19   34.30 
   7   1  -5  155.88   32.80 
   7   1  -5  145.29   33.10 
  -7   1   5  158.78   33.10 
   6  -1  -5   53.59   12.90 
  -6  -1   5   36.20   10.20 
  -6  -1   5   63.39   12.70 
  -6  -1   5   27.70   11.60 
   6  -1  -5   42.20   11.60 
   6  -1  -5   60.39   14.10 
  -6  -1   5   59.19   11.90 
   6   1  -5   52.69   11.60 
   6   1  -5   39.30   11.60 
   6   1  -5   79.19   16.00 
  -6   1   5   45.00   12.40 
  -6   1   5   49.00   11.80 
  -6   1   5   44.90   13.10 
   5  -1  -5  322.97   68.19 
  -5  -1   5  341.57   67.39 
   5  -1  -5  322.07   67.39 
  -5  -1   5  319.77   67.19 
  -5  -1   5  296.67   67.69 
   5  -1  -5  279.07   67.29 
  -5   1   5  285.97   67.69 
   5   1  -5  314.97   67.19 
  -5   1   5  309.77   67.39 
  -5   1   5  325.17   67.39 
   5   1  -5  312.47   67.39 
   5   1  -5  339.37   68.29 
  -4  -1   5  439.86   94.09 
   4  -1  -5  469.65   94.89 
   4  -1  -5  411.36   94.19 
  -4  -1   5  480.75   94.29 
   4  -1  -5  432.06   94.29 
  -4  -1   5  423.76   94.49 
  -4   1   5  450.75   94.29 
   4   1  -5  453.65   94.09 
  -4   1   5  442.16   94.19 
  -4   1   5  380.06   94.39 
   4   1  -5  479.15   94.99 
   4   1  -5  433.96   94.19 
   3  -1  -5  149.39   30.50 
  -3  -1   5  124.59   28.80 
  -3  -1   5  152.58   29.00 
   3  -1  -5  137.09   29.10 
   3  -1  -5  122.99   28.80 
  -3  -1   5  129.89   29.30 
  -3   1   5  135.79   29.00 
   3   1  -5  146.19   30.50 
  -3   1   5  139.19   29.10 
   3   1  -5  130.99   28.90 
   3   1  -5  128.09   28.80 
  -3   1   5  106.09   29.10 
  -2  -1   5   51.59   11.30 
  -2  -1   5   40.20   11.30 
   2  -1  -5   46.70   11.80 
   2  -1  -5   72.29   14.10 
   2  -1  -5   40.50   10.80 
   2   1  -5   45.20   10.80 
  -2   1   5   42.30   11.30 
  -2   1   5   43.70   11.10 
   2   1  -5   72.39   13.70 
   2   1  -5   46.70   11.30 
  -2   1   5   46.30   11.70 
   1  -1  -5  460.75  109.89 
  -1  -1   5  574.24  109.99 
   1  -1  -5  511.65  110.49 
   1  -1  -5  501.45  109.99 
  -1  -1   5  539.05  110.39 
  -1   1   5  501.05  110.09 
   1   1  -5  546.15  110.59 
  -1   1   5  480.95  109.99 
  -1   1   5  515.85  110.29 
   1   1  -5  524.25  109.99 
   1   1  -5  530.95  109.99 
   0  -1   5   96.19   21.40 
   0  -1   5   98.69   20.70 
   0  -1  -5   84.19   21.70 
   0   1  -5  100.29   20.40 
   0   1   5   92.09   21.20 
   0   1   5   84.19   20.60 
   0   1   5   90.29   20.60 
   0   1  -5   94.49   20.40 
   0   1  -5   95.89   22.30 
  -1  -1  -5   22.90    9.00 
   1  -1   5   30.90    9.50 
   1  -1   5   29.30    7.50 
  -1  -1  -5   27.10    7.10 
   1   1   5   17.30    7.90 
   1   1   5   20.70    7.30 
  -1   1  -5   29.60    7.10 
  -1   1  -5   30.00    9.40 
   1   1   5   32.30    7.00 
  -2  -1  -5  334.47   73.49 
   2  -1   5  372.16   73.59 
   2  -1   5  323.37   73.99 
  -2  -1  -5  337.77   73.89 
  -2   1  -5  364.16   74.09 
   2   1   5  333.97   73.59 
  -2   1  -5  357.36   73.49 
   2   1   5  322.77   73.89 
   3  -1   5  134.89   26.50 
  -3  -1  -5  108.49   25.90 
  -3  -1  -5  110.79   27.00 
   3  -1   5  108.69   26.60 
  -3   1  -5  115.69   25.90 
   3   1   5  127.59   26.30 
  -3   1  -5  136.19   27.10 
   3   1   5  110.09   26.60 
  -4  -1  -5  776.52  154.68 
   4  -1   5  676.83  154.48 
   4  -1   5  829.82  154.58 
  -4  -1  -5  643.04  154.18 
  -4   1  -5  824.22  154.88 
   4   1   5  634.94  154.48 
  -4   1  -5  699.53  154.18 
   4   1   5  717.33  154.38 
   5  -1   5  129.19   31.30 
  -5  -1  -5  127.09   30.60 
   5  -1   5  176.58   31.50 
   5   1   5  168.78   31.40 
  -5   1  -5  180.28   32.40 
  -5   1  -5  123.29   30.50 
   5   1   5  109.29   31.00 
  -6  -1  -5   50.69   13.70 
   6  -1   5   75.29   15.30 
   6  -1   5   85.39   16.30 
  -6  -1  -5   79.59   15.90 
  -6   1  -5   41.80   13.00 
   6   1   5   36.80   13.80 
   6   1   5   70.69   15.00 
   7  -1   5   81.09   17.60 
  -7  -1  -5   55.99   16.10 
  -7  -1  -5   78.39   17.80 
   7   1   5   41.80   16.10 
   7   1   5   81.29   17.20 
  -7   1  -5   58.59   16.30 
  -7   1  -5   92.29   18.10 
   8  -1   5   16.00    9.80 
   8  -1   5   17.10    9.60 
  -8  -1  -5   42.00   10.50 
  -8  -1  -5   23.10    8.40 
  -8   1  -5   14.50    7.70 
   8   1   5   20.20    9.80 
  -8   1  -5   21.70    9.60 
   8   1   5   36.20   10.00 
   9  -1   5    8.10    9.50 
  -9  -1  -5   12.40    8.50 
   9  -1   5    8.30    7.90 
  -9  -1  -5    8.90    6.00 
   9   1   5    8.60    7.80 
  -9   1  -5    8.00    6.10 
 -10  -1  -5   19.00    9.50 
  10  -1   5   56.09   13.40 
  10  -1   5   14.60   10.10 
 -10   1  -5   25.30    9.30 
 -10   1  -5   49.90   14.00 
  10   1   5    4.20   10.30 
  10   1   5   58.59   13.40 
 -11  -1  -5    7.90    6.60 
 -11  -1  -5   34.50    9.80 
  11  -1   5   44.30   15.70 
  11  -1   5    1.90    8.50 
  11   1   5   -3.50    9.60 
 -11   1  -5   13.10   11.90 
  11   1   5   10.70   12.00 
 -11   1  -5   12.10    7.30 
  12  -1   5    5.90   15.00 
  12  -1   5    1.10    9.90 
 -12  -1  -5   28.00   12.50 
 -12  -1  -5  -20.30   10.30 
  12  -1   5    0.80   11.90 
 -12  -1  -5   -0.70    7.40 
  12   1   5   20.80    7.60 
 -12   1  -5    9.30    7.70 
  12   1   5    3.10   13.10 
  12   1   5    3.40   11.20 
 -12   1  -5  -12.90   11.90 
  13  -1   5    5.90   15.50 
 -13  -1  -5   16.60   11.70 
 -13  -1  -5   14.30    8.00 
 -13  -1  -5  -11.00   11.60 
  13  -1   5  -12.70   12.10 
 -13   1  -5   15.90    9.00 
 -13   1  -5  -13.90   13.30 
  13   1   5    7.90   12.00 
  13   1   5   36.70   14.90 
 -14  -1  -5   30.60   14.80 
  14  -1   5  -12.00   12.10 
  14  -1   5   50.29   18.50 
 -14  -1  -5   -3.50   16.80 
 -14  -1  -5   -6.90    9.50 
  14  -1   5    3.80   18.60 
 -14   1  -5   -6.00   15.80 
  14   1   5   18.60   20.00 
  14   1   5   13.70   17.40 
 -14   1  -5   -9.00    8.00 
  15  -1   5   19.10   17.90 
  15  -1   5   -5.60   20.60 
  15  -1   5   59.69   20.40 
 -15  -1  -5   40.60   19.50 
 -15  -1  -5   -2.70   15.10 
 -15  -1  -5   -1.90    9.60 
  15   1   5   -9.80   18.00 
  15   1   5  -11.10   21.00 
 -15   1  -5   10.60   11.10 
 -15   1  -5    3.10   17.50 
  16  -1   5   15.90   30.60 
 -16  -1  -5    0.00   19.30 
 -16   1  -5   23.60   14.80 
  16   1   5   16.00   23.80 
 -16  -2   5   11.80   20.60 
 -16  -2   5  -32.70   21.60 
  16  -2  -5   30.50   21.60 
  16  -2  -5   23.50   27.40 
  16  -2  -5   -9.30   18.40 
 -16  -2   5   15.50   16.40 
  16   2  -5    7.60   21.10 
 -16   2   5  -13.10   14.00 
  15  -2  -5  -25.20   24.70 
 -15  -2   5    5.80   12.80 
 -15  -2   5   14.40   16.90 
  15  -2  -5    6.70   15.60 
 -15  -2   5   19.40   13.00 
 -15   2   5   -2.60   14.40 
  15   2  -5   32.20   21.10 
 -15   2   5   31.30   15.00 
  15   2  -5   -2.60   26.00 
  14  -2  -5    5.50   13.30 
  14  -2  -5  -14.70   19.70 
  14  -2  -5   21.70   13.00 
 -14  -2   5   -9.00   10.60 
 -14  -2   5    6.40   11.70 
 -14  -2   5   19.70   14.60 
 -14   2   5    1.30   12.10 
  14   2  -5    0.80   18.80 
  14   2  -5  -10.30   14.50 
 -14   2   5   -5.90   11.70 
  13  -2  -5   21.90   11.80 
 -13  -2   5    1.40    9.80 
 -13  -2   5   -6.90   11.40 
  13  -2  -5  -13.10   16.90 
  13  -2  -5   23.60   12.90 
 -13  -2   5    3.40    9.30 
  13   2  -5   -0.60   14.10 
 -13   2   5    1.20    9.60 
 -12  -2   5    5.80    8.70 
  12  -2  -5   -0.80   10.90 
  12  -2  -5   -9.80   13.50 
 -12  -2   5   12.70   10.60 
  12  -2  -5   -0.10   11.10 
 -12  -2   5    6.70   10.60 
 -12   2   5   -1.10    8.30 
  12   2  -5   -3.00   11.30 
  11  -2  -5   -5.20    8.70 
  11  -2  -5   -1.90   10.40 
 -11  -2   5    5.50    7.50 
  11  -2  -5   -9.90   12.60 
 -11  -2   5   10.50    9.10 
 -11  -2   5   17.80   11.90 
  11   2  -5   -4.30    9.40 
 -11   2   5    3.60    7.60 
 -11   2   5   -6.00    8.70 
 -10  -2   5   -7.40    6.60 
  10  -2  -5   -2.90    6.60 
 -10  -2   5   -7.90    6.70 
 -10  -2   5    9.30    7.80 
  10  -2  -5   12.80   10.50 
  10  -2  -5   17.50   12.10 
 -10   2   5   -1.50    7.30 
  10   2  -5    8.80   10.10 
  10   2  -5    8.00    8.40 
 -10   2   5    1.60    7.30 
  -9  -2   5   13.00    8.40 
  -9  -2   5    3.40    7.20 
   9  -2  -5    1.70    6.80 
   9  -2  -5  -11.00    9.90 
   9  -2  -5  -12.00    8.50 
  -9  -2   5   13.70    6.40 
   9   2  -5   13.50    7.80 
  -9   2   5    1.00    6.00 
   9   2  -5  -13.90    9.20 
  -8  -2   5   21.80    6.90 
   8  -2  -5   13.70    9.30 
   8  -2  -5   15.80    9.10 
   8  -2  -5   -2.00    6.00 
  -8  -2   5    5.10    6.00 
  -8  -2   5    9.60    6.80 
  -8   2   5   18.60    6.70 
   8   2  -5    8.30    6.10 
   8   2  -5   14.20    9.60 
  -8   2   5    9.70    6.60 
   8   2  -5    8.10    6.40 
  -7  -2   5   -2.30    5.90 
   7  -2  -5   -2.00    8.00 
  -7  -2   5   -0.90    5.80 
  -7  -2   5    1.00    5.70 
   7  -2  -5   12.50    9.80 
   7  -2  -5   -0.30    4.50 
   7   2  -5    2.30    4.60 
   7   2  -5   14.20    9.70 
  -7   2   5   -1.40    6.60 
  -7   2   5   -1.10    4.80 
   7   2  -5    2.30    4.90 
  -7   2   5   11.20    5.50 
  -6  -2   5   62.39   14.00 
   6  -2  -5   60.89   15.80 
  -6  -2   5   52.99   13.80 
   6  -2  -5   66.49   15.30 
  -6   2   5   38.10   13.90 
   6   2  -5   35.70   13.20 
   6   2  -5   61.79   14.40 
  -6   2   5   64.09   13.90 
  -6   2   5   60.69   15.80 
   6   2  -5   57.39   16.70 
   5  -2  -5   10.50    5.10 
  -5  -2   5   18.30    6.60 
   5  -2  -5   17.60    8.80 
  -5  -2   5    5.50    5.30 
  -5  -2   5   20.60    6.20 
   5  -2  -5   17.50    8.10 
  -5   2   5    4.90    5.80 
   5   2  -5    8.60    5.20 
   5   2  -5   13.90    6.10 
  -5   2   5    9.60    5.70 
  -5   2   5   21.40    8.40 
   5   2  -5   42.90   10.10 
   4  -2  -5  213.98   47.50 
   4  -2  -5  242.88   48.10 
  -4  -2   5  194.88   47.30 
  -4  -2   5  255.77   47.10 
  -4  -2   5  206.68   47.20 
   4  -2  -5  194.48   46.80 
  -4   2   5  202.88   47.20 
   4   2  -5  213.58   47.20 
  -4   2   5  218.18   47.50 
  -4   2   5  229.38   47.00 
   4   2  -5  212.48   47.00 
   4   2  -5  248.48   48.30 
  -3  -2   5  213.98   46.00 
   3  -2  -5  203.28   45.90 
   3  -2  -5  230.88   46.90 
   3  -2  -5  212.58   46.60 
  -3  -2   5  194.98   46.20 
  -3   2   5  209.08   46.00 
   3   2  -5  213.48   46.00 
   3   2  -5  252.97   47.30 
  -3   2   5  205.88   46.50 
   3   2  -5  223.38   46.30 
  -2  -2   5   56.69   11.70 
   2  -2  -5   45.20   11.20 
   2  -2  -5   49.00   12.70 
  -2  -2   5   60.39   12.60 
   2  -2  -5   69.19   13.50 
  -2   2   5   46.50   12.50 
   2   2  -5   71.09   14.40 
  -2   2   5   36.80   11.40 
   2   2  -5   40.90   11.90 
   1  -2  -5    1.60    5.20 
  -1  -2   5    2.10    4.20 
  -1  -2   5    1.10    5.50 
   1  -2  -5   -0.30    2.50 
   1  -2  -5    4.60    6.60 
  -1   2   5   -4.90    5.40 
   1   2  -5    7.10    6.80 
   1   2  -5    0.60    4.50 
   1   2  -5    0.80    1.80 
   0  -2   5   22.80    7.30 
   0  -2  -5   30.70    8.40 
   0  -2   5   17.10    6.00 
   0  -2   5   30.80    7.40 
   0  -2  -5   26.00    7.30 
   0   2   5   22.90    8.10 
   0   2   5   18.30    5.80 
   0   2  -5   16.10    8.00 
   0   2  -5   15.30    6.60 
  -1  -2  -5   51.59   11.50 
  -1  -2  -5   37.00   11.00 
   1  -2   5   48.80   11.00 
  -1  -2  -5   41.70   10.20 
   1  -2   5   61.29   12.30 
  -1   2  -5   44.40   10.60 
   1   2   5   44.70   10.60 
  -1   2  -5   62.89   12.60 
   1   2   5   33.10   10.80 
  -2  -2  -5    9.70    3.70 
  -2  -2  -5   20.80    6.70 
   2  -2   5   15.00    5.30 
   2  -2   5    1.80    4.10 
  -2   2  -5    4.30    4.10 
   2   2   5    8.80    5.70 
   2   2   5   10.70    4.80 
  -2   2  -5    8.60    3.40 
   2   2   5    4.30    4.50 
  -2   2  -5   14.20    6.90 
   3  -2   5   28.40    7.90 
  -3  -2  -5   18.40    6.60 
  -3  -2  -5   28.30    8.90 
   3  -2   5   16.20    8.30 
  -3   2  -5   20.80    6.80 
  -3   2  -5   38.10   10.10 
  -3   2  -5   28.70    7.00 
   3   2   5   20.20    8.20 
   3   2   5   32.70    8.20 
   3   2   5   24.20    7.70 
   4  -2   5    6.50    5.80 
  -4  -2  -5    0.00    6.00 
   4  -2   5    2.60    5.30 
  -4  -2  -5   -0.60    3.50 
  -4   2  -5   -2.90    3.20 
  -4   2  -5   -9.50    6.50 
  -4   2  -5    1.50    3.50 
   4   2   5   10.80    5.50 
   4   2   5    4.10    6.20 
   4   2   5    2.80    4.40 
   5  -2   5   29.30    8.70 
  -5  -2  -5    9.30    5.60 
  -5  -2  -5   24.70    8.80 
   5  -2   5   10.20    7.30 
   5   2   5    6.80    8.00 
  -5   2  -5   20.40    5.50 
   5   2   5   21.90    6.30 
   5   2   5   22.40    7.60 
  -5   2  -5   21.00    6.50 
  -5   2  -5   31.80    9.90 
  -6  -2  -5   29.10    8.40 
   6  -2   5   22.20    9.40 
   6   2   5   21.90    9.70 
   6   2   5   27.30    7.30 
  -6   2  -5   33.40    8.50 
  -6   2  -5   56.79   12.20 
   7  -2   5    8.00    6.80 
   7  -2   5   13.50    7.90 
  -7  -2  -5    1.50    7.10 
  -7  -2  -5    5.00    4.60 
  -7   2  -5    2.10    4.50 
   7   2   5    1.00    3.70 
   7   2   5   -0.90    5.80 
  -7   2  -5   -3.40    7.70 
   7   2   5    7.00    7.20 
  -8  -2  -5   23.70    9.60 
   8  -2   5   33.00    9.90 
   8  -2   5    2.70    7.10 
  -8  -2  -5    7.60    5.80 
  -8   2  -5   30.90   10.70 
   8   2   5   24.20    9.10 
   8   2   5   19.30    9.70 
  -8   2  -5   15.80    6.30 
   9  -2   5   13.90    9.80 
  -9  -2  -5    6.60    6.30 
  -9  -2  -5   10.00    8.20 
  -9  -2  -5    9.60   10.50 
   9  -2   5    1.20    8.80 
   9   2   5   15.80   10.30 
  -9   2  -5   20.00   12.20 
  -9   2  -5    6.80    5.90 
   9   2   5    5.90    9.20 
 -10  -2  -5   28.20   11.20 
 -10  -2  -5   32.70   11.60 
 -10  -2  -5   16.10    8.70 
  10  -2   5   32.30   17.10 
  10  -2   5   12.70   12.10 
  10  -2   5   28.20   13.10 
  10   2   5   23.10   13.50 
 -11  -2  -5   19.90    9.10 
 -11  -2  -5   24.80   12.30 
  11  -2   5   -0.60   13.20 
  11  -2   5    2.10   10.50 
  11  -2   5   47.20   17.90 
 -11  -2  -5   25.90   11.20 
  11   2   5   27.60   12.70 
 -11   2  -5   20.00    8.60 
  12  -2   5    2.20   12.90 
 -12  -2  -5   26.10   13.40 
  12  -2   5   43.60   19.50 
 -12  -2  -5    9.00    9.30 
 -12  -2  -5   28.20   13.10 
 -12   2  -5   20.20    9.30 
  12   2   5    2.40   14.50 
 -13  -2  -5    1.50    8.70 
  13  -2   5   10.00   15.40 
 -13  -2  -5   34.50   15.10 
 -13  -2  -5    4.80   13.20 
  13  -2   5   19.00   15.80 
  13   2   5   -0.50   18.20 
  13   2   5   23.60   15.10 
 -13   2  -5   14.60   13.90 
 -13   2  -5    1.30    8.50 
 -14  -2  -5    1.00    9.80 
  14  -2   5   -4.70   16.20 
 -14  -2  -5  -18.30   14.50 
  14  -2   5  -31.90   19.70 
 -14   2  -5    9.50   10.40 
 -14   2  -5   31.00   18.50 
  14   2   5   -1.40   17.00 
  14   2   5   -2.30   19.70 
  15  -2   5   33.40   28.60 
 -15  -2  -5   -6.30   16.30 
 -15  -2  -5   -1.90   18.40 
  15  -2   5   60.29   26.90 
  15   2   5  -17.00   19.90 
 -15   2  -5   -4.20   12.50 
  15  -3  -5   43.00   20.70 
  15  -3  -5   -5.30   22.00 
  15  -3  -5   20.50   28.70 
 -15  -3   5    6.10   16.80 
 -15  -3   5    5.10   21.40 
 -15   3   5   -3.70   16.30 
  15   3  -5   56.39   26.00 
 -14  -3   5   17.20   14.00 
  14  -3  -5    1.60   16.40 
 -14  -3   5   42.20   19.00 
  14  -3  -5  -24.50   23.40 
 -14  -3   5    6.20   14.20 
  14   3  -5   -2.50   24.00 
 -14   3   5   -2.00   14.10 
 -14   3   5    2.00   14.30 
  14   3  -5   15.40   21.50 
 -13  -3   5   32.90   13.80 
  13  -3  -5   -8.40   15.00 
  13  -3  -5   47.30   16.90 
 -13  -3   5   -4.10   12.10 
  13  -3  -5   21.80   20.20 
 -13  -3   5   31.60   14.60 
  13   3  -5   19.50   21.80 
  13   3  -5  -10.70   16.70 
 -13   3   5    8.60   12.10 
 -13   3   5   11.70   12.60 
  12  -3  -5    9.30   18.50 
 -12  -3   5  -18.10    9.20 
 -12  -3   5   -4.70   10.60 
  12  -3  -5    3.60   11.50 
 -12   3   5    9.20   10.40 
  12   3  -5   13.10   16.10 
  12   3  -5    0.70   17.20 
 -12   3   5    9.50   10.60 
  11  -3  -5    0.80   10.40 
 -11  -3   5    4.70    9.20 
 -11  -3   5   -8.60    9.00 
  11  -3  -5   37.70   16.30 
 -11  -3   5   19.70   10.50 
  11   3  -5   17.10   13.00 
 -11   3   5   -3.00    9.10 
  10  -3  -5   -1.70    9.80 
 -10  -3   5   10.00    7.90 
  10  -3  -5   -2.70   12.40 
 -10  -3   5   13.70    9.40 
 -10  -3   5   29.90    9.20 
  10  -3  -5   14.40   13.70 
  10   3  -5   -6.10   14.50 
  10   3  -5   -2.10   10.50 
 -10   3   5    0.80    7.70 
 -10   3   5    3.90    8.60 
  -9  -3   5   18.40   11.70 
  -9  -3   5   38.90   11.00 
   9  -3  -5   78.39   16.80 
  -9  -3   5   47.90   12.00 
   9   3  -5   21.20   13.90 
  -9   3   5   32.70   10.60 
  -9   3   5   33.10   12.10 
   9   3  -5   17.30   12.60 
   8  -3  -5   39.00   14.00 
   8  -3  -5   17.50   11.40 
  -8  -3   5   40.60   11.10 
   8  -3  -5   45.70   15.10 
  -8  -3   5   37.20   12.00 
  -8  -3   5   41.50   11.90 
   8   3  -5   32.10   14.30 
  -8   3   5   48.10   11.40 
  -8   3   5   25.00   11.60 
   8   3  -5   29.00   12.50 
  -7  -3   5   29.50    9.60 
  -7  -3   5   18.00    8.80 
  -7  -3   5   10.50    8.40 
   7  -3  -5   37.50   12.70 
   7  -3  -5   34.70   13.40 
  -7  -3   5   35.40    9.20 
   7   3  -5   30.90   12.20 
   7   3  -5   22.80   10.00 
  -7   3   5   30.40    8.90 
   6  -3  -5   -5.10    5.20 
  -6  -3   5   -5.50    6.80 
  -6  -3   5   -1.10    5.90 
   6  -3  -5    8.80    9.40 
  -6  -3   5   -1.00    5.40 
   6   3  -5  -14.40    8.80 
  -6   3   5    0.10    4.90 
   6   3  -5   -2.20    5.60 
  -6   3   5    2.70    5.30 
   6   3  -5   -3.40    5.60 
  -5  -3   5   76.09   16.70 
   5  -3  -5   98.49   19.10 
  -5  -3   5   82.79   18.20 
   5  -3  -5   69.59   16.70 
  -5  -3   5   67.89   17.50 
   5  -3  -5   63.29   17.10 
   5  -3  -5   58.19   18.10 
   5   3  -5   56.39   16.80 
   5   3  -5   67.39   17.90 
  -5   3   5   73.29   16.50 
  -5   3   5   81.29   20.50 
   5   3  -5   84.29   19.60 
   4  -3  -5    9.80    5.10 
  -4  -3   5    9.00    5.30 
  -4  -3   5   20.50    6.30 
   4  -3  -5   18.00    9.70 
   4  -3  -5   12.10    6.50 
  -4  -3   5   12.00    5.20 
   4  -3  -5   15.10   11.10 
  -4   3   5    9.50    4.90 
  -4   3   5   16.60    9.70 
   4   3  -5   12.60    6.40 
   4   3  -5   -1.70    8.00 
   4   3  -5    2.90    4.30 
  -3  -3   5   22.20    7.70 
   3  -3  -5   27.90    7.90 
  -3  -3   5   20.10    5.90 
  -3  -3   5   11.50    6.30 
   3  -3  -5   24.70   10.20 
   3   3  -5   29.00    9.00 
   3   3  -5   11.30    7.10 
  -3   3   5   31.80   11.00 
   3   3  -5   13.60    8.00 
   2  -3  -5   48.50   11.30 
   2  -3  -5   33.70   12.80 
  -2  -3   5   39.00   11.00 
   2   3  -5   31.90   11.70 
  -2   3   5   47.40   14.20 
  -1  -3   5   48.70   13.00 
   1  -3  -5   56.59   14.40 
   1   3  -5   45.90   13.00 
   1   3  -5   55.19   13.10 
  -1   3   5   40.90   14.20 
   0  -3  -5   59.99   15.30 
   0  -3   5   85.29   15.70 
   0   3  -5   71.09   15.90 
   0   3   5   44.00   15.10 
   0   3  -5   60.89   14.10 
   0   3  -5   69.59   15.10 
  -1  -3  -5   46.60   12.40 
   1  -3   5   61.99   12.60 
   1   3   5   29.80   12.70 
  -1   3  -5   60.89   12.70 
  -1   3  -5   48.50   12.60 
   2  -3   5   21.30    6.80 
   2  -3   5   14.60    7.30 
   2  -3   5   20.70    6.70 
  -2  -3  -5   21.70    8.20 
  -2   3  -5   24.00    7.70 
   2   3   5   16.40    6.30 
   2   3   5   19.30    8.10 
   3  -3   5    2.50    4.90 
   3  -3   5    8.60    6.40 
  -3  -3  -5    9.20    5.50 
  -3  -3  -5    1.40    2.80 
  -3  -3  -5   14.20    5.80 
   3   3   5   -3.80    6.80 
  -3   3  -5    1.30    6.70 
   3   3   5    9.80    5.60 
  -3   3  -5   -1.00    2.50 
  -3   3  -5    2.40    5.30 
   3   3   5    5.90    6.60 
  -4  -3  -5   22.30    6.60 
  -4  -3  -5    5.20    3.80 
   4  -3   5    2.20    6.00 
   4  -3   5   14.20    6.70 
  -4  -3  -5    7.10    8.20 
  -4   3  -5   14.60    7.50 
  -4   3  -5   12.10    6.30 
  -4   3  -5    6.90    3.70 
   4   3   5    6.80    6.80 
   4   3   5    7.60    6.50 
   4   3   5    3.30    6.50 
  -5  -3  -5   84.39   16.60 
   5  -3   5   74.59   16.80 
  -5  -3  -5   48.70   14.90 
   5  -3   5   51.99   16.70 
   5   3   5   76.79   17.00 
   5   3   5   59.09   17.10 
  -5   3  -5   67.89   15.00 
  -5   3  -5   81.79   16.30 
   5   3   5   50.19   15.30 
  -5   3  -5   88.29   17.80 
   6  -3   5    7.90    7.40 
   6  -3   5   12.70    7.50 
  -6  -3  -5    0.60    4.90 
  -6  -3  -5    9.20    9.50 
  -6  -3  -5    2.50    6.60 
  -6   3  -5    1.80    8.60 
   6   3   5    8.10    8.20 
  -6   3  -5    7.50    4.90 
   6   3   5    5.80    6.50 
  -6   3  -5    2.20    5.30 
   6   3   5   -0.30    7.50 
   7  -3   5    5.00   14.20 
  -7  -3  -5    2.10    7.80 
  -7  -3  -5   11.20    9.70 
   7  -3   5    3.10    9.00 
   7  -3   5  -11.10    7.80 
  -7  -3  -5    4.00    5.30 
   7   3   5   -1.70    8.80 
  -7   3  -5    0.20    5.40 
  -7   3  -5    8.90    9.40 
   7   3   5   -1.90    8.60 
  -8  -3  -5   60.39   19.60 
   8  -3   5   78.19   22.10 
  -8  -3  -5   94.59   21.40 
   8  -3   5  113.39   23.00 
  -8   3  -5   66.89   20.30 
   8   3   5   67.79   22.30 
  -8   3  -5  112.09   22.70 
   8   3   5  117.09   22.60 
   9  -3   5  -13.90   10.10 
   9  -3   5   29.50   17.00 
  -9  -3  -5   14.20    9.30 
  -9  -3  -5   -9.10   11.50 
  -9  -3  -5   -0.70    6.30 
   9  -3   5   18.10   11.50 
   9   3   5  -11.20   11.10 
   9   3   5    4.10   11.10 
  -9   3  -5   -9.80    9.80 
  -9   3  -5    1.30    6.90 
 -10  -3  -5    7.70    7.30 
 -10  -3  -5    2.10   10.00 
  10  -3   5   -3.70   11.60 
  10  -3   5   -2.90   12.60 
 -10   3  -5   11.80    7.90 
  10   3   5    5.20   13.10 
 -11  -3  -5    2.10    8.20 
  11  -3   5   20.20   15.40 
 -11  -3  -5   17.10   12.20 
  11  -3   5    5.70   13.40 
  11  -3   5   56.59   25.10 
  11   3   5   -0.70   15.00 
 -11   3  -5    9.80    9.50 
  11   3   5    7.00   13.60 
  12  -3   5    1.60   25.00 
 -12  -3  -5    6.30    8.80 
 -12  -3  -5    4.40   14.00 
  12  -3   5   -2.60   14.10 
  12  -3   5   -7.10   17.20 
 -12  -3  -5    3.20   16.20 
 -12   3  -5   -5.20    9.30 
  12   3   5  -10.10   17.80 
 -12   3  -5  -14.40   13.50 
  12   3   5    2.20   16.60 
  13  -3   5   57.19   28.70 
  13  -3   5   -4.40   16.60 
 -13  -3  -5   15.00   14.40 
 -13  -3  -5   47.20   20.30 
 -13  -3  -5    9.50   10.70 
  13  -3   5  -12.10   27.70 
 -13   3  -5    2.30   18.80 
  13   3   5  -16.40   24.10 
 -13   3  -5   -5.00   14.20 
  13   3   5   12.50   20.00 
  14  -3   5    8.30   23.30 
 -14  -3  -5   -0.10   24.60 
 -14  -3  -5   46.80   19.70 
 -14   3  -5    9.60   12.10 
  14   3   5   -2.70   22.80 
 -13  -4   5    4.50   22.40 
  13  -4  -5  -13.00   17.90 
 -13  -4   5    6.00   15.70 
  13  -4  -5  -25.40   32.10 
 -13  -4   5    9.40   14.70 
  13   4  -5  -20.90   20.60 
 -13   4   5   -8.50   14.00 
  12  -4  -5   -4.40   16.70 
 -12  -4   5   21.80   13.30 
 -12  -4   5   39.90   14.40 
  12  -4  -5    5.70   24.60 
 -12  -4   5   71.79   16.60 
 -12   4   5    4.60   13.90 
 -12   4   5    2.20   13.20 
  12   4  -5    4.50   19.90 
  12   4  -5   29.10   26.70 
  11  -4  -5  -16.30   20.40 
  11  -4  -5  -13.50   13.40 
 -11  -4   5   11.30   11.50 
 -11  -4   5   14.00   11.60 
 -11  -4   5   53.89   14.30 
  11  -4  -5   51.69   20.50 
  11   4  -5    2.30   16.80 
 -11   4   5    2.60   11.50 
  11   4  -5   -7.00   22.50 
 -11   4   5   -0.60   11.30 
  10  -4  -5  -12.80   11.20 
 -10  -4   5    0.60    9.00 
 -10  -4   5   22.20   11.40 
  10  -4  -5   17.10   18.20 
 -10  -4   5   -1.60    9.50 
 -10   4   5   -7.60    9.70 
  10   4  -5   -8.70   14.40 
  10   4  -5  -30.10   18.40 
  -9  -4   5   16.60    9.60 
   9  -4  -5  -39.30   15.80 
  -9  -4   5   -7.20    8.90 
   9  -4  -5    6.20   10.30 
   9  -4  -5   25.70   15.90 
  -9  -4   5   10.00    8.50 
  -9   4   5   -7.80    8.00 
  -9   4   5    9.10    8.40 
   9   4  -5   11.00   12.70 
  -8  -4   5   10.70    7.10 
  -8  -4   5   14.20    7.60 
   8  -4  -5   34.20   13.80 
  -8  -4   5   -8.70    7.80 
   8   4  -5  -19.20   14.70 
  -8   4   5    7.00    7.20 
   8   4  -5    3.10   11.80 
  -8   4   5   10.70    7.70 
  -7  -4   5   23.50    9.50 
  -7  -4   5   32.20   10.50 
  -7  -4   5   26.00    8.10 
  -7   4   5    7.20    7.60 
   7   4  -5   40.10   15.10 
  -7   4   5   25.90    8.30 
   7   4  -5    6.30    9.80 
   6  -4  -5    6.30    8.10 
  -6  -4   5    7.40   10.00 
  -6  -4   5   -0.10    5.70 
  -6  -4   5    6.90    6.30 
   6   4  -5   11.20   16.30 
   6   4  -5   -0.80    7.30 
   5  -4  -5    7.90   13.70 
   5  -4  -5    7.10    8.20 
  -5  -4   5   -2.20    5.60 
  -5  -4   5    4.00   10.40 
   5   4  -5    0.80   11.90 
  -4  -4   5  -12.90   10.30 
   4  -4  -5   -2.20    7.80 
  -4  -4   5   10.30    7.40 
   4  -4  -5    4.60   12.50 
   4   4  -5   -0.80    9.90 
   3  -4  -5   -1.90   11.80 
   3  -4  -5   14.80    8.50 
  -3  -4   5    8.10    7.50 
  -3  -4   5  -11.20   11.30 
   3   4  -5    7.00    8.60 
  -2  -4   5   -0.90   12.20 
  -2  -4   5   -5.50    7.00 
   2  -4  -5    3.80   10.70 
   2  -4  -5   -7.50    8.00 
  -1  -4   5   11.10    7.10 
   1  -4  -5   -9.80    8.00 
  -1  -4   5   -6.70   11.90 
   1   4  -5    7.20    8.50 
   0  -4   5  -15.80   12.20 
   0  -4  -5   -3.80   10.60 
   0  -4  -5   -0.10    9.40 
   0   4  -5    4.10    8.20 
   1  -4   5   25.90    7.90 
  -1  -4  -5   11.90    9.60 
   1  -4   5   -0.60   13.00 
  -1  -4  -5    9.10    9.90 
  -1   4  -5    0.40    7.20 
  -2  -4  -5    9.90   11.50 
   2  -4   5    8.50    6.70 
   2  -4   5   20.40   15.00 
  -2  -4  -5   11.80    9.00 
  -2   4  -5   11.50    8.30 
  -3  -4  -5   16.20   11.40 
  -3  -4  -5   14.90    8.90 
   3  -4   5   28.50   16.20 
  -3   4  -5    6.70    7.90 
   4  -4   5  118.79   29.60 
  -4  -4  -5  126.79   27.60 
   4   4   5  111.49   25.60 
  -4   4  -5  113.19   25.70 
  -4   4  -5   85.89   25.60 
  -5   4  -5  229.68   53.99 
  -5   4  -5  262.27   55.09 
   5   4   5  254.67   54.49 
  -6  -4  -5    0.20    4.40 
  -6  -4  -5   -3.00    7.00 
   6  -4   5    6.40    9.60 
   6  -4   5   -5.50    8.60 
   6   4   5    8.90   10.50 
  -6   4  -5    4.30    5.10 
   6   4   5    2.10   10.10 
  -6   4  -5   -7.40    8.80 
  -7  -4  -5   15.80    8.10 
   7  -4   5   24.00   10.90 
   7  -4   5  -23.40    9.70 
  -7  -4  -5    5.60    6.10 
  -7   4  -5    2.10    6.70 
   7   4   5    7.40   11.80 
   7   4   5  -23.70   11.30 
  -7   4  -5   12.50    9.90 
   8  -4   5  -19.10   11.10 
  -8  -4  -5    7.10    9.20 
   8  -4   5   13.20   20.90 
   8  -4   5   -1.70   12.00 
  -8  -4  -5    3.60    6.50 
  -8  -4  -5  -17.10   12.70 
  -8   4  -5  -10.80   10.10 
   8   4   5    0.20   13.00 
   8   4   5  -18.30   14.40 
  -8   4  -5    6.10    7.90 
   9  -4   5    0.30   14.20 
  -9  -4  -5   49.60   15.40 
   9  -4   5  -17.40   13.80 
   9  -4   5   67.59   25.30 
  -9  -4  -5    3.30    7.50 
  -9  -4  -5   -9.70   10.40 
  -9   4  -5    5.30   12.20 
   9   4   5   -9.80   14.60 
   9   4   5  -24.10   15.20 
  -9   4  -5   15.50    9.20 
  10  -4   5   55.29   28.90 
 -10  -4  -5   -8.40    8.70 
  10  -4   5   -1.10   15.60 
 -10  -4  -5   20.30   12.20 
  10  -4   5   -4.70   15.30 
 -10  -4  -5   11.70   18.40 
  10   4   5    3.30   16.40 
 -10   4  -5   -3.10   13.80 
  10   4   5    5.70   17.50 
 -10   4  -5    0.60    9.80 
  11  -4   5   13.10   18.40 
 -11  -4  -5    3.90   10.20 
 -11  -4  -5  -12.90   19.80 
  11  -4   5   71.79   33.40 
 -11  -4  -5   16.00   13.90 
  11  -4   5   22.60   19.20 
 -11   4  -5    5.10   11.70 
 -11   4  -5  -13.80   15.50 
  11   4   5   23.80   20.60 
  11   4   5   -7.60   18.10 
  12  -4   5   59.29   24.80 
 -12  -4  -5    7.80   12.00 
  12  -4   5   -2.60   21.10 
 -12  -4  -5   21.60   17.20 
  12   4   5  -25.80   20.70 
 -12   4  -5    4.70   12.80 
 -10  -5   5   31.20   12.10 
 -10   5   5   17.70   13.00 
  10   5  -5  -37.60   29.20 
  -9  -5   5   19.20   11.20 
  -9  -5   5   22.30    9.80 
   9   5  -5   -3.50   16.40 
   9   5  -5  -28.80   25.10 
   8  -5  -5   85.29   24.00 
  -8  -5   5  -13.30   13.80 
  -8  -5   5   23.00   10.90 
   7  -5  -5   28.30   11.20 
  -7  -5   5    7.50   13.20 
   7  -5  -5   21.50   21.50 
  -7  -5   5    1.20   11.70 
   7   5  -5   -0.60   18.80 
   7   5  -5    9.90   14.60 
  -6  -5   5    9.30   12.80 
   6  -5  -5   33.60   19.50 
  -6  -5   5    8.70   10.90 
   6  -5  -5    6.50   13.70 
  -5  -5   5   13.30   16.80 
  -5  -5   5    2.20   12.30 
   5  -5  -5   43.90   13.20 
   5  -5  -5   33.30   19.10 
  -4  -5   5    2.30   10.20 
  -4  -5   5   30.60   15.10 
   4  -5  -5   31.20   17.60 
   4  -5  -5    5.40   12.20 
  -3  -5   5   19.30   10.90 
  -3  -5   5    2.80   15.10 
   3  -5  -5   14.20   16.10 
   3  -5  -5   21.90   12.40 
  -2  -5   5   -1.50   18.90 
  -2  -5   5  -10.10    9.30 
   2  -5  -5   16.00   12.40 
   2  -5  -5    1.50   14.70 
  -1  -5   5  -10.20    9.40 
   1  -5  -5   -6.70   12.30 
  -1  -5   5  -17.20   17.20 
   1  -5  -5   33.00   14.50 
   0  -5   5   98.29   25.00 
   0  -5  -5   59.79   20.60 
   1  -5   5  151.18   37.80 
   1  -5   5  138.79   33.90 
  -1  -5  -5  157.58   35.10 
  -1  -5  -5  152.18   36.00 
  -2  -5  -5   56.59   20.20 
  -2  -5  -5   68.39   17.40 
   2  -5   5   52.49   16.10 
  -3  -5  -5   26.00   15.00 
  -3  -5  -5    0.60   10.40 
   3  -5   5   18.70   21.70 
  -4  -5  -5    6.10   15.00 
  -4  -5  -5   -8.10    9.80 
   4  -5   5    1.10   24.60 
   5  -5   5    2.50   25.80 
  -5  -5  -5   -5.90   16.30 
   6  -5   5   13.40   28.50 
  -6  -5  -5    4.00   16.00 
   7  -5   5    8.70   31.00 
  -7  -5  -5    0.30   18.90 
  -7   5  -5    2.60   11.90 
   7   5   5   47.40   18.40 
  -8   5  -5   -3.80   10.80 
  -8   5  -5   -5.40   11.80 
   8   5   5   -0.10   18.90 
   8   5   5  -14.30   20.50 
   9  -5   5   15.80   20.30 
  -9  -5  -5    6.70    8.70 
  -9   5  -5   38.60   15.00 
   9   5   5  -17.70   22.10 
   4  -6  -5   21.60   20.50 
  -4  -6   5   55.89   22.70 
   3  -6  -5   59.99   27.70 
  -3  -6   5  124.89   30.20 
   2  -6  -5   29.70   28.30 
   2  -6  -5   83.79   26.40 
  -2  -6   5  139.69   30.00 
  -1  -6   5   34.40   17.10 
  -1  -6   5   46.50   26.70 
   1  -6  -5   31.60   23.10 
   1  -6  -5    9.40   20.50 
   0  -6  -5   64.79   21.00 
   0  -6  -5  -11.30   21.50 
   0  -6   5    6.50   18.90 
   0  -6   5   88.89   28.80 
   1  -6   5    5.80   28.90 
  -1  -6  -5   40.30   23.00 
  -1  -6  -5   19.90   18.20 
   1  -6   5    1.90   14.50 
   2  -6   5  -34.60   14.40 
  17   0  -6   19.10   21.10 
  17   0  -6  -11.90   27.40 
 -17   0   6   29.70   18.80 
  16   0  -6  -33.70   23.50 
 -16   0   6   21.50   14.40 
 -16   0   6    4.80   15.20 
  16   0  -6   -7.90   15.60 
 -15   0   6    4.90   11.10 
 -15   0   6    2.70   11.80 
  15   0  -6   -3.60   13.80 
  15   0  -6   -8.50   16.50 
  14   0  -6    5.30   17.00 
 -14   0   6    9.50   11.70 
 -14   0   6    2.70   11.00 
  14   0  -6   20.20   12.00 
 -13   0   6    9.40    9.50 
  13   0  -6    3.80   10.00 
  13   0  -6  -19.50   11.80 
  12   0  -6    3.80   13.90 
 -12   0   6   -1.40   12.70 
 -12   0   6   -2.10    7.60 
  12   0  -6   -4.70    8.00 
 -11   0   6    5.50    7.80 
  11   0  -6   14.50    7.90 
  11   0  -6   26.20   13.00 
  10   0  -6  240.18   58.69 
 -10   0   6  243.58   58.99 
  10   0  -6  335.87   60.09 
 -10   0   6  272.97   58.49 
  -9   0   6   34.30   14.00 
   9   0  -6   57.59   14.90 
  -9   0   6   58.39   13.40 
  -9   0   6   76.29   14.90 
  -8   0   6  673.83  140.89 
   8   0  -6  625.54  140.89 
  -8   0   6  640.24  141.29 
   8   0  -6  719.93  141.79 
  -8   0   6  643.74  140.49 
   7   0  -6   76.29   20.10 
  -7   0   6   90.19   19.70 
   7   0  -6   82.59   19.50 
  -7   0   6  105.29   20.80 
   7   0  -6  130.39   22.90 
  -7   0   6   76.49   20.60 
  -6   0   6  152.18   35.30 
  -6   0   6  170.38   34.40 
   6   0  -6  173.88   36.50 
   6   0  -6  148.99   34.20 
  -6   0   6  168.48   35.00 
   6   0  -6  145.39   34.80 
  -5   0   6   15.20    5.30 
  -5   0   6   16.00    6.70 
   5   0  -6   13.00    9.40 
   5   0  -6   10.60    4.80 
  -5   0   6   10.40    6.90 
   5   0  -6   17.70    6.00 
  -4   0   6   70.49   15.60 
   4   0  -6   49.20   13.80 
  -4   0   6   61.89   13.50 
  -4   0   6   61.89   14.40 
   3   0  -6   24.60   10.60 
  -3   0   6   24.60    8.30 
   3   0  -6   18.50    6.20 
  -3   0   6   22.40    6.80 
   2   0  -6  146.89   33.60 
  -2   0   6  152.18   31.80 
  -2   0   6  133.69   32.50 
   2   0  -6  144.89   31.80 
  -1   0   6   29.70    8.00 
  -1   0   6   28.00    9.50 
   1   0  -6   25.20    7.60 
   1   0  -6   29.50   11.20 
   0   0  -6 1598.34  351.06 
   0   0   6 1684.13  351.46 
   0   0  -6 1738.03  351.56 
   0   0   6 1587.84  351.06 
  -1   0  -6 1158.88  252.67 
   1   0   6 1191.18  252.67 
  -1   0  -6 1234.08  253.07 
   1   0   6 1166.48  253.07 
   2   0   6   54.19   10.90 
  -2   0  -6   36.70   11.70 
   2   0   6   39.30   11.50 
  -2   0  -6   36.60   10.20 
   3   0   6  220.48   52.09 
   3   0   6  256.77   51.89 
  -3   0  -6  244.38   51.59 
  -3   0  -6  231.98   52.29 
  -4   0  -6  284.47   60.99 
  -4   0  -6  316.37   61.89 
   4   0   6  253.47   61.39 
   5   0   6   88.49   21.00 
  -5   0  -6   87.09   21.40 
   5   0   6   79.39   19.90 
   6   0   6 1098.49  206.28 
  -6   0  -6 1096.59  206.48 
   6   0   6  831.32  206.08 
  -6   0  -6  853.91  205.68 
   7   0   6  205.48   46.90 
  -7   0  -6  218.98   46.40 
   8   0   6   75.89   18.00 
  -8   0  -6   58.39   15.00 
   9   0   6   24.80   10.60 
  -9   0  -6   15.60   11.10 
   9   0   6   18.50   10.30 
  -9   0  -6   10.20    6.80 
  10   0   6    3.30    8.20 
 -10   0  -6   11.40    6.40 
  10   0   6   32.80   10.70 
 -10   0  -6   36.00   10.90 
 -11   0  -6   -2.30    5.40 
  11   0   6    4.70    8.60 
  11   0   6  -17.60   10.30 
 -11   0  -6    6.20   10.90 
 -12   0  -6    4.80    7.00 
  12   0   6    5.70   10.90 
  12   0   6   12.20   13.80 
 -12   0  -6   16.10   13.00 
 -13   0  -6    0.30    8.50 
  13   0   6    4.70   13.90 
  13   0   6  -18.60   16.40 
 -13   0  -6   22.30   14.80 
  13   0   6   32.20   15.60 
  14   0   6   10.90   12.60 
 -14   0  -6    8.10   16.80 
 -14   0  -6   -1.40    8.50 
  14   0   6   33.40   15.40 
  14   0   6    1.70   19.50 
  15   0   6   36.70   16.30 
  15   0   6  -21.70   22.70 
  15   0   6   -6.60   18.50 
 -15   0  -6    8.80   11.40 
 -15   0  -6   10.70   18.80 
  16   0   6   36.10   21.20 
 -16   0  -6    0.90   12.30 
 -17  -1   6    5.20   23.60 
  17  -1  -6   32.90   28.90 
 -17  -1   6   32.80   15.90 
  17   1  -6   19.00   20.20 
 -17   1   6    4.50   15.60 
  16  -1  -6    2.90   24.60 
  16  -1  -6   -6.80   17.80 
 -16  -1   6   -0.10   14.20 
 -16  -1   6   13.50   13.70 
 -16   1   6   19.20   14.60 
  16   1  -6   -4.40   19.80 
 -16   1   6    2.30   16.10 
  16   1  -6  -26.60   24.30 
 -15  -1   6   24.50   12.70 
  15  -1  -6  -21.20   18.40 
 -15  -1   6   -0.90   11.00 
  15  -1  -6  -10.10   13.30 
 -15   1   6   -2.00   11.80 
  15   1  -6   29.90   18.50 
  15   1  -6    4.70   20.40 
 -15   1   6   34.20   13.00 
  14  -1  -6   35.20   17.90 
 -14  -1   6    8.10    9.90 
  14  -1  -6    2.30    9.70 
 -14  -1   6    9.00    9.10 
  14  -1  -6    7.40   11.50 
 -14   1   6    8.10   10.20 
 -14   1   6   -4.50   11.80 
  14   1  -6    0.80   13.10 
  14   1  -6  -24.30   16.20 
  13  -1  -6  -26.40   12.70 
 -13  -1   6    9.40    9.90 
  13  -1  -6   13.50    8.60 
 -13  -1   6   15.10    9.90 
 -13  -1   6   -9.30    9.30 
  13  -1  -6    9.90   10.00 
 -13   1   6    2.00    9.70 
  13   1  -6  -29.00   14.60 
 -13   1   6    0.80   10.30 
  13   1  -6   -4.60    9.70 
 -12  -1   6   48.30   15.50 
 -12  -1   6   51.19   12.60 
 -12  -1   6   73.49   13.00 
  12  -1  -6   52.89   12.30 
  12  -1  -6   34.40   13.80 
  12  -1  -6   21.50   15.80 
  12   1  -6   30.70   15.20 
 -12   1   6   17.30   11.90 
  12   1  -6   21.70   14.40 
 -12   1   6   33.40   12.60 
 -11  -1   6   67.39   14.40 
 -11  -1   6   73.49   15.30 
  11  -1  -6   63.39   16.40 
  11  -1  -6   29.90   13.90 
 -11  -1   6   58.09   18.80 
  11  -1  -6   55.39   14.70 
  11   1  -6   46.30   17.60 
  11   1  -6   32.90   15.30 
 -11   1   6   30.50   14.90 
 -11   1   6   52.49   14.10 
  10  -1  -6    1.40    9.70 
  10  -1  -6    2.30    6.40 
 -10  -1   6   30.10    8.50 
 -10  -1   6   15.70    7.00 
 -10  -1   6    7.00    7.50 
 -10   1   6    4.90    6.80 
  10   1  -6   -1.00    5.60 
   9  -1  -6   52.79   14.40 
  -9  -1   6   35.50   11.10 
   9  -1  -6   24.20    9.80 
  -9  -1   6   22.10    7.30 
  -9  -1   6   53.89   11.10 
   9   1  -6   32.50    8.70 
  -9   1   6   45.20   10.30 
  -9   1   6   19.00    9.20 
   9   1  -6   32.60   12.20 
   8  -1  -6    4.60   10.30 
   8  -1  -6    2.70    5.00 
  -8  -1   6   -2.40    3.10 
   8  -1  -6   -4.30    6.40 
  -8  -1   6    3.00    6.00 
  -8  -1   6   -3.20    5.30 
   8   1  -6    4.60    8.90 
  -8   1   6   -1.10    5.00 
   8   1  -6   -1.80    4.60 
  -8   1   6    2.40    6.30 
   8   1  -6   -4.20    4.40 
  -8   1   6   -0.50    4.80 
   7  -1  -6  236.08   47.70 
   7  -1  -6  244.08   48.90 
  -7  -1   6  263.17   47.90 
  -7  -1   6  194.58   48.00 
  -7  -1   6  236.78   47.40 
  -7  -1   6  211.08   46.90 
   7  -1  -6  199.28   47.60 
  -7   1   6  183.78   47.90 
  -7   1   6  224.78   47.70 
  -7   1   6  226.88   47.70 
   7   1  -6  219.48   47.40 
   7   1  -6  226.48   48.80 
   7   1  -6  192.58   47.60 
  -6  -1   6  468.55   93.19 
   6  -1  -6  451.85   93.99 
  -6  -1   6  374.76   93.39 
  -6  -1   6  426.16   92.89 
   6  -1  -6  404.56   93.09 
   6  -1  -6  452.15   93.09 
   6   1  -6  459.95   92.99 
   6   1  -6  441.76   93.19 
  -6   1   6  458.05   93.19 
  -6   1   6  433.56   93.19 
  -6   1   6  382.66   93.39 
   6   1  -6  463.35   94.09 
  -5  -1   6  147.79   31.60 
   5  -1  -6  154.88   33.50 
  -5  -1   6  174.88   32.00 
   5  -1  -6  149.69   32.00 
  -5  -1   6  130.09   32.20 
   5  -1  -6  133.39   31.70 
   5   1  -6  143.09   31.60 
  -5   1   6  150.18   31.90 
  -5   1   6  123.89   32.10 
   5   1  -6  141.79   31.70 
  -5   1   6  135.09   31.80 
   5   1  -6  170.78   33.60 
   4  -1  -6   44.00   10.50 
   4  -1  -6   32.80   11.50 
  -4  -1   6   32.80    8.80 
  -4  -1   6   27.50    9.50 
  -4  -1   6   41.80    9.40 
   4  -1  -6   30.40    8.80 
  -4   1   6   37.70   10.40 
  -4   1   6   33.80   10.00 
  -4   1   6   29.40    8.80 
   4   1  -6   28.30    8.70 
   4   1  -6   46.10   13.00 
   4   1  -6   26.20    8.40 
   3  -1  -6   44.80   11.40 
   3  -1  -6   39.60   10.80 
  -3  -1   6   45.50   11.50 
  -3  -1   6   56.09   12.70 
   3  -1  -6   57.29   14.30 
  -3   1   6   41.20   10.90 
  -3   1   6   43.60   11.60 
   3   1  -6   50.39   13.40 
   3   1  -6   38.60   10.80 
  -3   1   6   51.79   11.20 
   3   1  -6   42.20   10.60 
   2  -1  -6   47.70   10.50 
  -2  -1   6   38.40   10.50 
   2  -1  -6   42.10   10.20 
  -2  -1   6   45.20   11.50 
   2  -1  -6   51.59   12.90 
  -2   1   6   38.80   10.20 
  -2   1   6   32.90   10.50 
   2   1  -6   37.40   10.30 
   2   1  -6   54.89   10.60 
   2   1  -6   56.69   13.30 
  -2   1   6   36.40   11.50 
  -1  -1   6  182.38   39.60 
  -1  -1   6  212.88   38.90 
   1  -1  -6  163.68   38.70 
   1  -1  -6  174.28   40.00 
   1   1  -6  172.28   38.70 
   1   1  -6  195.38   40.20 
  -1   1   6  157.28   39.30 
   1   1  -6  190.58   38.70 
  -1   1   6  181.78   38.90 
  -1   1   6  172.68   38.80 
   0  -1   6  207.58   40.70 
   0  -1   6  185.18   41.30 
   0  -1  -6  173.38   41.50 
   0   1   6  194.38   40.60 
   0   1   6  156.88   41.10 
   0   1  -6  199.78   40.60 
   0   1  -6  197.38   41.80 
   0   1   6  182.78   40.70 
  -1  -1  -6   43.90   11.50 
   1  -1   6   73.79   14.00 
  -1  -1  -6   61.69   13.60 
   1  -1   6   49.60   12.00 
   1   1   6   37.80   12.70 
   1   1   6   48.00   11.80 
  -1   1  -6   41.50   11.40 
  -1   1  -6   62.89   14.00 
  -2  -1  -6  336.27   70.29 
  -2  -1  -6  297.87   69.69 
   2  -1   6  365.86   69.99 
   2  -1   6  324.57   70.29 
  -2   1  -6  323.77   69.79 
   2   1   6  289.47   70.19 
   2   1   6  327.67   69.89 
  -2   1  -6  347.97   70.59 
  -3  -1  -6  162.18   38.50 
  -3  -1  -6  187.88   39.60 
   3  -1   6  205.38   39.10 
   3  -1   6  144.99   39.00 
  -3   1  -6  175.88   38.60 
   3   1   6  177.18   39.40 
  -3   1  -6  195.38   39.60 
   3   1   6  190.18   39.00 
  -4  -1  -6   56.49   12.40 
   4  -1   6   45.50   11.90 
   4  -1   6   44.60   10.70 
  -4  -1  -6   25.10    9.10 
  -4   1  -6   28.40    8.90 
   4   1   6   44.40   10.60 
  -4   1  -6   50.39   12.30 
   4   1   6   30.10   10.20 
   5  -1   6  129.99   27.30 
  -5  -1  -6  128.99   26.60 
   5   1   6   99.29   27.10 
  -5   1  -6  119.29   26.50 
  -6  -1  -6   92.99   21.90 
   6  -1   6  103.39   22.70 
   6  -1   6   82.19   21.10 
  -6   1  -6  110.09   22.50 
   6   1   6   73.29   21.70 
   6   1   6   83.39   21.00 
  -7  -1  -6   43.00   13.10 
  -7  -1  -6   24.50   10.30 
   7  -1   6   43.70   12.90 
   7   1   6   48.00   12.30 
  -7   1  -6   90.29   16.10 
  -8  -1  -6    1.60    4.00 
   8  -1   6   -2.30    7.00 
  -8  -1  -6    8.70    9.40 
   8  -1   6    0.80    8.40 
   8   1   6   -0.20    5.80 
   8   1   6    7.10    8.70 
  -8   1  -6    2.60    4.30 
  -8   1  -6    2.50   10.00 
   9  -1   6   47.90   18.90 
  -9  -1  -6   95.59   20.40 
   9  -1   6  103.39   21.10 
  -9  -1  -6   68.49   18.50 
  -9   1  -6  113.59   21.90 
  -9   1  -6   57.89   17.90 
   9   1   6   86.79   20.00 
   9   1   6   67.59   20.20 
  10  -1   6   48.80   15.60 
 -10  -1  -6   35.30   13.60 
 -10   1  -6   51.39   15.00 
 -10   1  -6   95.19   19.10 
  10   1   6   97.89   19.40 
  10   1   6   53.39   15.70 
  11  -1   6   15.80   10.40 
 -11  -1  -6    2.90    6.30 
 -11  -1  -6   29.30   12.30 
  11  -1   6   14.30   12.60 
 -11   1  -6   -2.30   10.60 
  11   1   6   21.90   10.90 
 -11   1  -6    0.60    6.40 
  11   1   6    2.90    9.20 
 -12  -1  -6   14.00   11.20 
 -12  -1  -6   26.10   13.30 
  12  -1   6  -23.10   18.20 
  12  -1   6   10.10   10.10 
  12  -1   6   33.70   12.90 
 -12  -1  -6    7.10    7.30 
  12   1   6   16.40    9.50 
  12   1   6    7.30   10.70 
 -12   1  -6   15.70    7.80 
 -12   1  -6    0.10   13.10 
  12   1   6   20.50   14.70 
  13  -1   6   -0.60   18.40 
 -13  -1  -6    2.00    7.60 
  13  -1   6    6.30   14.00 
  13  -1   6    8.90   12.90 
 -13   1  -6    1.50   12.70 
  13   1   6    3.40   16.30 
 -13   1  -6    0.00    8.10 
  13   1   6   -2.50   11.40 
 -14  -1  -6   33.80   14.50 
 -14  -1  -6   10.10    8.40 
 -14  -1  -6   10.90   13.90 
  14  -1   6   -8.60   14.30 
  14  -1   6   -6.90   16.80 
 -14   1  -6  -14.10   14.80 
 -14   1  -6    0.60    8.60 
  14   1   6   -5.50   15.80 
  14   1   6   39.00   19.70 
  15  -1   6  -11.10   15.60 
 -15  -1  -6    7.10   15.70 
 -15  -1  -6   22.90   17.80 
  15  -1   6  -18.90   21.80 
  15  -1   6   53.59   21.50 
 -15  -1  -6    7.30   11.30 
 -15   1  -6    7.70   10.60 
  15   1   6   12.90   37.90 
  15   1   6  -14.20   16.90 
  16  -2  -6  -20.60   27.80 
 -16  -2   6  -11.90   21.30 
  16  -2  -6  -33.40   20.30 
 -16  -2   6   32.10   20.80 
  16  -2  -6   24.60   16.70 
 -16  -2   6   -3.80   17.20 
 -16   2   6    4.60   17.00 
  16   2  -6   12.70   21.40 
 -15  -2   6   23.20   15.60 
  15  -2  -6   -5.00   22.60 
  15  -2  -6   14.50   19.20 
 -15  -2   6    1.70   17.70 
 -15  -2   6   14.60   15.80 
 -15   2   6   34.10   14.80 
 -15   2   6   36.10   13.80 
  15   2  -6   19.50   18.30 
  15   2  -6   38.60   23.60 
 -14  -2   6   20.20   11.00 
 -14  -2   6    6.50   11.80 
  14  -2  -6   15.80   13.90 
  14  -2  -6   -1.80   21.40 
  14  -2  -6   35.80   13.10 
 -14  -2   6    7.50   14.50 
 -14   2   6   -9.20   11.40 
  14   2  -6   21.20   18.90 
 -14   2   6   21.00   14.10 
  14   2  -6   20.20   16.00 
  13  -2  -6   -9.60   15.80 
 -13  -2   6    0.60   11.50 
 -13  -2   6   11.80   10.20 
 -13  -2   6   -5.70    8.70 
  13  -2  -6   17.50   11.40 
  13  -2  -6   15.70   13.70 
 -13   2   6    3.10   11.20 
  13   2  -6    0.60   22.20 
 -12  -2   6    3.00    8.00 
 -12  -2   6   13.00    9.40 
  12  -2  -6   13.30   14.10 
  12  -2  -6    0.00    9.50 
  12  -2  -6   -5.40   10.60 
 -12  -2   6    5.60   10.30 
 -12   2   6    5.10    9.60 
  12   2  -6    2.00   10.90 
 -11  -2   6   18.00    8.40 
  11  -2  -6   -1.70    8.50 
 -11  -2   6    5.30    9.70 
  11  -2  -6   13.70   10.80 
  11  -2  -6   22.10   12.20 
  11   2  -6    2.40    9.80 
 -11   2   6    3.00    7.70 
 -11   2   6  -22.60   12.70 
 -10  -2   6   -2.60    6.70 
  10  -2  -6  -17.00   11.00 
  10  -2  -6   -2.00    8.10 
 -10  -2   6    8.90    7.90 
 -10  -2   6    2.90    8.60 
 -10   2   6  -10.40    7.10 
 -10   2   6    5.30    8.10 
  10   2  -6    3.20   10.70 
  10   2  -6   -9.90    7.70 
  -9  -2   6    0.30    7.00 
   9  -2  -6   17.60   11.10 
   9  -2  -6    4.90    9.50 
  -9  -2   6    8.60    6.90 
   9  -2  -6    2.30    7.60 
  -9  -2   6   -4.00    7.60 
  -9   2   6   -1.50    5.80 
   9   2  -6  -11.30    8.90 
  -9   2   6   10.40    7.30 
   9   2  -6    3.90    6.30 
   9   2  -6   12.80    6.80 
  -8  -2   6   26.40    8.70 
   8  -2  -6   15.80    9.90 
  -8  -2   6    4.50    7.70 
   8  -2  -6   12.40    7.10 
   8  -2  -6   23.20   10.20 
  -8  -2   6   19.20    7.90 
   8   2  -6   23.50    7.80 
  -8   2   6    5.80    7.20 
  -8   2   6   20.30   10.00 
   8   2  -6   17.60    7.70 
  -8   2   6   25.90    7.80 
   8   2  -6    6.90   10.60 
   7  -2  -6    8.30    5.10 
  -7  -2   6    4.40    7.00 
   7  -2  -6   11.20   10.00 
  -7  -2   6    9.10    6.50 
  -7  -2   6    9.70    5.80 
   7  -2  -6    6.90    8.10 
   7   2  -6   14.80    9.60 
  -7   2   6    8.20    8.40 
   7   2  -6    3.90    5.50 
  -7   2   6   15.60    6.40 
  -7   2   6    3.50    5.70 
   7   2  -6    6.60    5.20 
   6  -2  -6   66.39   15.80 
  -6  -2   6   57.59   13.20 
  -6  -2   6   43.50   13.60 
   6  -2  -6   65.49   15.50 
   6  -2  -6   41.80   13.50 
  -6  -2   6   64.59   13.60 
   6   2  -6   41.50   13.00 
  -6   2   6   28.90   13.00 
  -6   2   6   53.29   14.50 
  -6   2   6   65.89   13.30 
   6   2  -6   90.29   17.70 
   6   2  -6   44.30   12.80 
   5  -2  -6   37.00   10.70 
  -5  -2   6   33.50    8.20 
  -5  -2   6   35.10    8.30 
  -5  -2   6   15.00    8.00 
   5  -2  -6   30.90   11.00 
   5   2  -6   23.60    7.80 
  -5   2   6   13.00    7.80 
   5   2  -6   41.70   11.90 
  -5   2   6   23.80    7.50 
   5   2  -6   14.00    7.40 
  -5   2   6   32.60   10.90 
  -4  -2   6   58.29   15.80 
   4  -2  -6   69.79   16.70 
  -4  -2   6   88.89   15.90 
   4  -2  -6   78.59   18.10 
  -4  -2   6   69.89   16.00 
   4  -2  -6   59.79   15.40 
  -4   2   6   55.79   15.90 
  -4   2   6   72.39   15.60 
   4   2  -6   60.99   15.30 
   4   2  -6  101.99   18.70 
   4   2  -6   71.39   15.80 
  -4   2   6   49.90   15.70 
  -3  -2   6  164.38   33.10 
   3  -2  -6  163.98   34.20 
   3  -2  -6  133.29   32.50 
  -3  -2   6  156.58   32.70 
  -3  -2   6  135.29   33.00 
   3  -2  -6  151.68   33.40 
   3   2  -6  162.68   33.10 
   3   2  -6  141.69   32.60 
  -3   2   6  134.89   32.80 
  -3   2   6  148.79   32.70 
  -3   2   6  157.18   33.40 
   3   2  -6  185.28   34.50 
  -2  -2   6    2.60    4.70 
  -2  -2   6   11.40    6.70 
   2  -2  -6    9.90    4.20 
  -2  -2   6   17.50    5.50 
   2  -2  -6   12.90    7.90 
   2  -2  -6   10.40    7.70 
   2   2  -6   19.00    6.20 
  -2   2   6   13.50    8.10 
   2   2  -6   11.30    8.40 
   2   2  -6   14.80    4.50 
  -2   2   6    4.80    4.40 
   1  -2  -6  110.79   23.70 
  -1  -2   6   90.29   23.60 
   1  -2  -6   98.79   22.90 
  -1  -2   6  118.29   23.30 
   1  -2  -6  109.39   24.00 
  -1   2   6   98.29   23.70 
   1   2  -6   98.19   22.80 
   1   2  -6  126.99   25.10 
   1   2  -6  110.09   23.40 
   0  -2   6   11.00    5.70 
   0  -2  -6   25.10    7.30 
   0  -2  -6    8.00    4.20 
   0  -2  -6   20.20    6.90 
   0  -2   6   20.70    5.20 
   0   2   6   11.70    6.30 
   0   2  -6   28.80    6.50 
   0   2   6   14.80    4.80 
   0   2  -6   18.70    7.90 
   0   2   6    3.70    4.50 
   0   2  -6   11.60    4.20 
  -1  -2  -6  192.08   43.60 
   1  -2   6  224.58   43.80 
   1  -2   6  161.58   44.00 
  -1  -2  -6  213.78   44.20 
  -1   2  -6  217.68   44.60 
   1   2   6  198.68   43.90 
   1   2   6  207.68   43.70 
  -1   2  -6  212.28   43.80 
  -1   2  -6  201.18   43.60 
  -2  -2  -6  310.67   58.39 
   2  -2   6  318.57   58.09 
  -2  -2  -6  241.08   57.69 
   2  -2   6  238.18   58.29 
   2   2   6  285.27   57.89 
   2   2   6  259.37   58.29 
   2   2   6  269.27   57.89 
  -2   2  -6  271.07   57.79 
  -2   2  -6  242.58   57.69 
  -3  -2  -6   39.30   12.10 
   3  -2   6   43.80   13.40 
   3  -2   6   74.09   13.60 
  -3  -2  -6   80.39   14.80 
   3   2   6   60.59   14.60 
  -3   2  -6   52.69   12.20 
   3   2   6   51.29   12.80 
   3   2   6   66.89   13.50 
  -3   2  -6   72.19   15.00 
  -3   2  -6   43.20   12.30 
   4  -2   6   32.90   10.40 
   4  -2   6   58.39   10.80 
  -4  -2  -6   37.20    9.30 
  -4   2  -6   33.30    8.80 
   4   2   6   56.29   10.90 
   4   2   6   27.00    8.80 
   4   2   6   43.90   11.80 
  -4   2  -6   35.50    9.20 
  -5  -2  -6   73.09   16.40 
   5  -2   6   78.39   15.70 
   5  -2   6   70.79   16.70 
  -5  -2  -6   48.80   14.20 
   5   2   6   69.39   15.50 
   5   2   6   61.59   13.90 
   5   2   6   80.69   17.10 
  -5   2  -6   49.70   13.80 
  -5   2  -6   64.69   14.50 
  -6  -2  -6   54.09   11.50 
   6  -2   6   26.80   10.40 
  -6  -2  -6   22.50    8.40 
  -6   2  -6   24.60    7.60 
   6   2   6   48.80   10.90 
   6   2   6   18.20   10.10 
   6   2   6   31.30    8.20 
  -6   2  -6   57.59   13.50 
  -6   2  -6   29.30    8.90 
   7  -2   6   -4.50    6.40 
  -7  -2  -6    0.00    4.10 
   7  -2   6    2.40    8.50 
  -7  -2  -6   -6.80    7.10 
   7   2   6   -1.30    7.70 
   7   2   6    5.20    3.90 
  -7   2  -6   23.10    9.30 
  -7   2  -6    0.00    4.20 
   7   2   6    0.00    7.80 
   8  -2   6   15.10   10.40 
  -8  -2  -6   11.90    5.60 
  -8  -2  -6   11.50   10.40 
   8  -2   6    1.20    8.50 
   8   2   6   10.50    4.50 
  -8   2  -6    6.80    5.80 
   8   2   6    7.20    9.10 
   8   2   6    4.00    7.50 
  -8   2  -6   29.30   10.60 
   9  -2   6   12.50    9.80 
   9  -2   6   -3.40    8.20 
  -9  -2  -6    3.60    6.00 
  -9  -2  -6   -3.60    9.10 
  -9   2  -6    4.90    5.70 
  -9   2  -6    7.90   10.60 
   9   2   6   29.50   10.30 
   9   2   6    3.50    8.40 
 -10  -2  -6    2.90    9.10 
  10  -2   6   14.70   12.00 
 -10  -2  -6   15.90   11.20 
 -10  -2  -6   -0.50    6.10 
  10  -2   6    2.90    8.30 
  10   2   6   16.90   11.70 
 -10   2  -6    6.40    6.80 
 -11  -2  -6    7.70   10.30 
 -11  -2  -6   -1.80    6.00 
  11  -2   6    5.00   11.60 
  11  -2   6   23.40   17.50 
 -11  -2  -6    2.10   11.10 
  11  -2   6    5.60   10.30 
 -11   2  -6    3.70    7.10 
  11   2   6   -1.20   11.70 
  12  -2   6   38.50   15.30 
 -12  -2  -6    3.20   12.70 
  12  -2   6   40.60   20.10 
 -12  -2  -6   12.80    9.00 
 -12  -2  -6    5.40   13.50 
  12  -2   6    0.20   11.70 
 -12   2  -6   21.70   11.10 
 -13  -2  -6  -10.70   12.60 
 -13  -2  -6   12.10   15.20 
  13  -2   6   25.40   16.50 
  13  -2   6   -0.40   13.90 
 -13  -2  -6    0.10    8.40 
 -13   2  -6  -25.60   13.60 
  13   2   6   16.50   14.30 
  13   2   6    5.60   16.50 
 -13   2  -6    5.00    8.40 
  14  -2   6   73.79   22.20 
 -14  -2  -6    3.80    9.90 
  14  -2   6   -0.10   15.00 
 -14  -2  -6    8.00   15.50 
  14  -2   6   45.30   31.20 
  14   2   6    9.40   25.80 
 -14   2  -6    6.50   23.80 
  14   2   6  -10.50   16.60 
 -14   2  -6   -0.70    9.50 
  15  -2   6  -30.20   27.30 
 -15  -2  -6  -12.20   25.20 
 -15  -2  -6   29.20   20.50 
  15  -2   6   41.20   28.10 
 -15   2  -6   10.00   11.40 
  15   2   6  -40.60   22.90 
 -15  -3   6   36.20   22.00 
  15  -3  -6   70.29   30.70 
  15  -3  -6  -31.50   29.50 
  15  -3  -6   31.80   20.30 
 -15  -3   6  -10.40   16.70 
 -15   3   6   -3.00   15.70 
  15   3  -6   28.50   25.20 
  14  -3  -6   41.20   18.30 
 -14  -3   6   -7.30   14.90 
  14  -3  -6   -0.40   15.50 
  14  -3  -6   29.40   23.80 
 -14  -3   6   19.40   18.10 
 -14  -3   6   27.20   14.80 
  14   3  -6   -7.10   20.60 
  14   3  -6   37.80   27.80 
 -14   3   6   18.10   15.40 
 -14   3   6   -3.80   14.40 
 -13  -3   6    6.10   12.20 
 -13  -3   6   28.20   13.30 
  13  -3  -6    4.30   21.80 
  13  -3  -6    0.80   13.90 
  13  -3  -6   34.00   16.50 
 -13  -3   6   23.50   14.10 
 -13   3   6   13.10   12.40 
  13   3  -6   20.30   16.60 
 -13   3   6   12.30   12.40 
  13   3  -6   16.20   21.60 
  12  -3  -6   27.70   18.40 
 -12  -3   6  -10.20   11.20 
 -12  -3   6    5.80   10.20 
  12  -3  -6    1.10   12.10 
 -12   3   6    1.30   12.60 
  12   3  -6   -5.10   13.70 
  12   3  -6   41.60   19.70 
 -12   3   6    6.70   10.50 
 -11  -3   6   12.10   10.70 
 -11  -3   6   18.30   11.20 
  11  -3  -6    1.20   15.80 
 -11  -3   6   14.70   10.10 
  11  -3  -6    4.30   10.70 
  11   3  -6   -3.50   12.00 
 -11   3   6   19.20   10.90 
  10  -3  -6  -21.70   13.40 
 -10  -3   6    8.60    8.80 
  10  -3  -6   34.40   13.10 
 -10  -3   6   17.80    9.30 
  10  -3  -6   -5.80    9.60 
 -10  -3   6   12.60    9.70 
 -10   3   6    5.10    8.70 
 -10   3   6    3.10    9.50 
  10   3  -6   35.70   15.40 
  10   3  -6    0.90   10.50 
   9  -3  -6   11.80   10.80 
   9  -3  -6   53.99   14.90 
  -9  -3   6   39.40   10.90 
  -9  -3   6    8.60   10.20 
  -9  -3   6   22.10   10.20 
  -9   3   6   43.50   10.10 
  -9   3   6   23.00   10.70 
   9   3  -6   28.70   16.00 
   9   3  -6   20.20   11.60 
   8  -3  -6    7.00   10.90 
   8  -3  -6   -1.30    7.30 
  -8  -3   6   -6.20    6.20 
  -8  -3   6    9.90    8.20 
  -8  -3   6   -4.30    7.20 
   8  -3  -6    1.10   11.50 
  -8   3   6    1.80    6.30 
   8   3  -6    9.70    9.30 
   8   3  -6    4.10    7.50 
   8   3  -6   13.00   11.70 
  -8   3   6    5.20    7.40 
  -7  -3   6   15.70    6.40 
  -7  -3   6    0.90    6.60 
   7  -3  -6   -2.20    6.00 
  -7  -3   6    6.70    6.80 
   7  -3  -6   16.80   11.40 
   7  -3  -6   28.10   11.20 
  -7  -3   6   13.80    7.50 
  -7   3   6    3.60    6.80 
   7   3  -6   -5.40    6.20 
  -7   3   6    5.80    6.50 
   7   3  -6   44.80   12.80 
   7   3  -6    5.40    6.70 
   6  -3  -6   65.99   19.60 
  -6  -3   6   14.00    8.60 
   6  -3  -6   16.10    8.30 
  -6  -3   6   42.90   16.10 
   6  -3  -6   41.40   11.90 
  -6  -3   6   23.70    8.00 
  -6   3   6   27.90    7.80 
  -6   3   6   11.60    8.10 
   6   3  -6   23.40    8.20 
  -6   3   6   20.60   11.10 
   6   3  -6   25.70    8.80 
   6   3  -6   30.30   12.10 
   5  -3  -6   47.80   16.60 
  -5  -3   6   80.59   17.30 
   5  -3  -6   86.79   17.00 
  -5  -3   6   88.79   18.40 
   5  -3  -6   95.09   19.70 
   5  -3  -6   79.09   18.20 
  -5  -3   6   79.89   16.70 
  -5   3   6   58.79   18.30 
  -5   3   6   76.89   16.60 
   5   3  -6   61.79   16.80 
   5   3  -6   66.79   17.50 
  -5   3   6   48.50   16.50 
   5   3  -6  112.09   20.70 
   4  -3  -6   13.00    6.60 
   4  -3  -6   42.90   10.80 
  -4  -3   6   14.30    7.70 
   4  -3  -6   32.30   10.70 
  -4  -3   6   25.80    7.40 
  -4  -3   6   36.30    8.80 
   4   3  -6   18.30    7.00 
  -4   3   6   23.80   12.00 
   4   3  -6   17.40    7.80 
  -4   3   6   22.40    6.60 
   4   3  -6   44.50   11.90 
  -3  -3   6    5.90    4.00 
  -3  -3   6   -7.40    5.00 
  -3  -3   6    5.80    5.60 
   3  -3  -6    7.10    9.00 
   3   3  -6    5.00    3.20 
   3   3  -6    7.00    5.70 
   3   3  -6   -8.80    7.80 
  -3   3   6   -1.90    3.20 
  -3   3   6    4.30    8.20 
   2  -3  -6   85.09   19.60 
  -2  -3   6   57.29   16.80 
  -2  -3   6   92.39   18.00 
   2   3  -6   84.59   18.40 
  -2   3   6   76.19   19.50 
   2   3  -6   50.09   17.30 
  -1  -3   6    8.40    5.80 
  -1  -3   6    2.80    4.70 
   1  -3  -6    3.20    7.20 
  -1   3   6   10.00    7.90 
   1   3  -6   12.60    7.20 
   1   3  -6    2.20    5.90 
   0  -3   6   29.80    7.50 
   0  -3   6   12.10    7.00 
   0  -3  -6   27.80    8.80 
   0   3  -6   16.80    7.80 
   0   3  -6   19.00    7.70 
   0   3   6   20.60    8.90 
   1  -3   6   20.30    5.80 
  -1  -3  -6   10.90    7.20 
   1  -3   6    2.10    5.60 
   1  -3   6   10.40    4.70 
  -1   3  -6    9.80    5.80 
   1   3   6    7.00    4.50 
   1   3   6    4.90    7.40 
  -1   3  -6   14.50    6.60 
  -2  -3  -6    7.20    6.00 
  -2  -3  -6    2.50    3.20 
   2  -3   6    1.90    6.00 
   2  -3   6   11.80    4.80 
  -2   3  -6    4.70    3.10 
   2   3   6    9.30    6.90 
   2   3   6   10.40    4.80 
  -2   3  -6   19.40    7.00 
  -3  -3  -6   33.10    8.80 
   3  -3   6   42.10    8.70 
   3  -3   6   18.50    9.60 
  -3  -3  -6   21.10    7.50 
  -3   3  -6   47.30   11.40 
  -3   3  -6   25.40    7.70 
   3   3   6   30.30    9.90 
   3   3   6   26.90    8.30 
  -3   3  -6   26.70    9.70 
  -4  -3  -6    5.00    3.80 
  -4  -3  -6   23.70    7.20 
   4  -3   6   14.30    6.20 
   4  -3   6    0.00    7.60 
  -4   3  -6    3.50    3.70 
   4   3   6    8.50    6.60 
   4   3   6   10.50    6.50 
   4   3   6   17.70    7.20 
  -4   3  -6   11.40    6.10 
  -4   3  -6    2.90    7.70 
   5  -3   6   32.50   12.10 
   5  -3   6   57.89   12.40 
  -5  -3  -6   26.90    9.90 
  -5  -3  -6   58.29   12.60 
  -5   3  -6   35.90   10.40 
   5   3   6   36.40   12.90 
   5   3   6   32.00   11.50 
   5   3   6   52.49   12.50 
  -5   3  -6   50.69   11.80 
  -6  -3  -6   26.80   12.10 
  -6  -3  -6   37.40   10.90 
   6  -3   6    5.70    9.80 
   6  -3   6   43.80   10.70 
   6   3   6   24.20   11.40 
  -6   3  -6   22.00    8.50 
   6   3   6   28.10   12.10 
  -6   3  -6   36.90    9.60 
   6   3   6   34.10   10.40 
   7  -3   6   53.69   14.00 
  -7  -3  -6   54.69   13.90 
   7  -3   6   23.50   13.30 
  -7  -3  -6   26.80   10.60 
  -7  -3  -6   51.29   12.90 
  -7   3  -6   22.60   10.20 
   7   3   6   26.30   13.30 
   7   3   6   34.10   10.90 
   7   3   6   60.99   13.80 
  -7   3  -6   45.00   14.10 
  -8  -3  -6   13.20    6.40 
   8  -3   6   14.80   10.30 
   8  -3   6   11.70   10.20 
  -8  -3  -6   23.00    9.30 
  -8  -3  -6   -0.20   13.10 
   8   3   6    8.10   10.50 
  -8   3  -6   12.30    6.60 
   8   3   6   -1.60    9.70 
   8   3   6    9.80    7.00 
  -8   3  -6   40.00   12.00 
   9  -3   6    7.90   12.60 
  -9  -3  -6    0.40    6.40 
   9  -3   6    1.80   10.70 
  -9  -3  -6   19.30   12.10 
   9  -3   6   22.70   18.30 
  -9  -3  -6   -5.80    9.90 
  -9   3  -6   -7.90   10.90 
  -9   3  -6    6.00    7.60 
   9   3   6   35.10   12.60 
   9   3   6    2.50   11.00 
 -10  -3  -6    5.10    7.20 
  10  -3   6   -9.90   12.70 
  10  -3   6   -1.60   11.70 
 -10  -3  -6    0.90   10.00 
  10   3   6   -0.60   13.00 
 -10   3  -6   11.70    7.70 
 -10   3  -6   -6.90   15.50 
  10   3   6   23.30   16.00 
  11  -3   6   -2.00   14.00 
 -11  -3  -6    5.00    8.10 
  11  -3   6   12.00   15.20 
 -11  -3  -6  -13.00   14.80 
 -11  -3  -6    2.20   11.60 
  11  -3   6   36.70   22.50 
 -11   3  -6    6.40    8.20 
  11   3   6    0.60   15.10 
  11   3   6   10.70   16.30 
 -11   3  -6   22.20   14.30 
 -12  -3  -6  -35.00   13.70 
  12  -3   6   21.50   15.90 
  12  -3   6   22.90   19.10 
 -12  -3  -6   -4.50    9.40 
  12  -3   6   18.20   26.00 
 -12  -3  -6   26.50   17.10 
  12   3   6   22.10   17.00 
 -12   3  -6   -9.20   14.00 
  12   3   6   -8.90   18.40 
 -12   3  -6   -1.90   10.30 
 -13  -3  -6   29.30   24.90 
 -13  -3  -6   25.80   19.90 
  13  -3   6   31.10   20.70 
  13  -3   6   14.20   17.70 
  13  -3   6   42.80   31.60 
 -13  -3  -6    3.00   11.80 
  13   3   6    5.70   19.40 
  13  -4  -6  -71.59   35.10 
  13  -4  -6  -10.50   17.50 
 -13  -4   6    5.60   15.10 
 -13  -4   6    0.90   15.40 
 -13   4   6    3.90   14.70 
  13   4  -6   -3.50   21.20 
 -12  -4   6   31.40   13.60 
  12  -4  -6   43.20   22.90 
  12  -4  -6  -37.10   24.40 
 -12  -4   6   44.30   15.70 
  12  -4  -6    5.60   16.10 
 -12  -4   6   -5.50   12.30 
  12   4  -6  -35.30   18.20 
  12   4  -6  -15.80   26.50 
 -12   4   6   10.10   13.00 
 -12   4   6  -19.00   12.90 
 -11  -4   6   28.60   13.70 
 -11  -4   6    6.70   11.80 
  11  -4  -6  -29.30   20.60 
 -11  -4   6   13.80   11.20 
  11  -4  -6   -8.50   13.60 
 -11   4   6    0.00   12.00 
 -11   4   6    4.70   11.40 
  11   4  -6    9.60   16.70 
  11   4  -6  -46.60   23.70 
 -10  -4   6   15.30   10.30 
  10  -4  -6   -7.50   12.70 
 -10  -4   6    7.60    9.10 
 -10  -4   6   19.30   12.10 
  10  -4  -6  -24.30   18.50 
  10   4  -6    2.00   14.20 
 -10   4   6  -13.00    9.90 
   9  -4  -6  -11.20   10.00 
  -9  -4   6   14.20    8.90 
   9  -4  -6  -16.90   15.60 
   9  -4  -6   42.70   16.40 
  -9  -4   6    8.00    9.30 
  -9  -4   6  -13.70    9.10 
  -9   4   6   17.00    9.00 
  -9   4   6   -3.30    8.10 
   9   4  -6    1.20   12.50 
   8  -4  -6    6.10   13.90 
  -8  -4   6    4.60    8.60 
  -8  -4   6    7.70    7.80 
   8  -4  -6  -11.80    9.10 
  -8  -4   6   16.80    7.80 
  -8   4   6   14.80    8.00 
   8   4  -6   -8.30   16.00 
  -8   4   6   10.70    8.30 
   8   4  -6    9.40   11.20 
  -7  -4   6   29.70    8.50 
  -7  -4   6   36.10   11.10 
   7  -4  -6   17.30   10.10 
   7   4  -6   25.00   15.80 
   7   4  -6   28.50   11.30 
  -7   4   6    7.60    8.10 
  -7   4   6   11.30    8.30 
  -6  -4   6    9.20    6.50 
  -6  -4   6   19.20   10.60 
  -6  -4   6   -2.50    7.30 
   6  -4  -6   12.60    8.30 
   6   4  -6   14.60   14.30 
   6   4  -6    9.70    7.90 
  -6   4   6   14.20    6.30 
  -5  -4   6   -2.90   11.00 
   5  -4  -6   -5.20    7.70 
   5  -4  -6   -2.80   12.30 
  -5  -4   6   -2.70    5.90 
   5   4  -6   -2.70   12.20 
   5   4  -6   -1.80    8.50 
   5   4  -6   14.70    7.10 
   4  -4  -6   10.20   12.40 
  -4  -4   6    4.20   12.00 
   4  -4  -6   13.70    8.30 
  -4  -4   6   -5.50    6.90 
   4   4  -6   -4.50    8.10 
   4   4  -6   -3.00   11.00 
   3  -4  -6   -6.80    8.40 
  -3  -4   6   14.20   12.20 
   3  -4  -6  -11.60   11.20 
  -3  -4   6    9.00    7.70 
   3   4  -6   10.50    8.40 
  -2  -4   6   -4.30    7.20 
  -2  -4   6   -7.50   12.20 
   2  -4  -6    1.80    8.60 
   2  -4  -6   11.20   11.50 
   2   4  -6    7.20    8.80 
   1  -4  -6   -1.30   10.30 
   1  -4  -6   -6.80    9.70 
  -1  -4   6   16.40    7.90 
  -1  -4   6   16.00   13.60 
   1   4  -6   -2.00    7.10 
  -1   4   6   -2.80   10.90 
   0  -4  -6    3.40   10.90 
   0  -4  -6   -0.20   10.20 
   0  -4   6    2.50    7.10 
   0   4  -6   -3.90    8.40 
   0   4   6   -2.00    9.80 
  -1  -4  -6   -1.90   10.40 
   1  -4   6   17.20    8.60 
  -1  -4  -6   18.60    9.50 
  -1   4  -6   10.90    8.10 
   1   4   6   -0.20   10.00 
  -2  -4  -6   27.70   10.00 
  -2  -4  -6   10.80   12.00 
   2  -4   6   27.60   15.60 
   2  -4   6   22.60    8.10 
  -2   4  -6   11.90    9.20 
   2   4   6   12.60   10.90 
   3  -4   6   -8.70   15.40 
  -3  -4  -6   -0.90    7.40 
  -3  -4  -6  -20.10   11.80 
  -3   4  -6   -2.50    7.90 
  -3   4  -6   -1.30    7.60 
   4  -4   6   31.70   18.10 
  -4  -4  -6   29.00   13.10 
  -4   4  -6   19.40    9.90 
  -4   4  -6   21.70   10.10 
   4   4   6   10.90    9.10 
   5  -4   6   59.79   17.30 
  -5  -4  -6   59.99   14.20 
  -5   4  -6   49.70   14.20 
   5   4   6   91.69   19.70 
   6  -4   6   10.10    9.20 
  -6  -4  -6    3.90    5.30 
  -6  -4  -6    4.90    7.40 
  -6   4  -6    3.70    8.60 
  -6   4  -6    7.70    5.90 
   6   4   6   10.40   10.70 
  -6   4  -6    2.10   10.60 
   6   4   6   47.40   12.90 
  -7  -4  -6   -5.30    8.70 
   7  -4   6  -12.10   10.80 
   7  -4   6    9.60   11.40 
  -7  -4  -6    5.00    6.10 
  -7   4  -6   -3.10   10.90 
   7   4   6    6.00   12.50 
  -7   4  -6    0.60    9.10 
  -7   4  -6   -4.10    6.40 
   7   4   6   -4.70   12.20 
   8  -4   6   24.60   12.50 
  -8  -4  -6    5.00    7.00 
   8  -4   6    5.00   13.00 
   8  -4   6   25.80   22.60 
  -8  -4  -6  -18.60   14.70 
  -8  -4  -6   -3.70    9.40 
   8   4   6    3.60   14.50 
  -8   4  -6    7.20    8.00 
   9  -4   6   71.89   25.20 
   9  -4   6  -17.20   14.50 
  -9  -4  -6  -19.10   15.00 
  -9  -4  -6   25.40   11.90 
   9  -4   6   23.30   14.90 
  -9  -4  -6    9.10    8.20 
  -9   4  -6   -8.50   12.50 
   9   4   6   10.60   15.80 
  -9   4  -6   -0.60    8.70 
   9   4   6  -12.20   15.50 
  10  -4   6   -8.70   15.60 
  10  -4   6    7.10   16.70 
 -10  -4  -6    4.30   13.00 
 -10  -4  -6   -6.30   16.20 
  10  -4   6   -1.20   28.10 
 -10  -4  -6   11.90    9.30 
 -10   4  -6   -1.50   13.40 
 -10   4  -6   11.00   10.30 
  10   4   6   11.20   18.10 
  10   4   6   22.40   17.40 
 -11  -4  -6   -4.10   10.00 
  11  -4   6    0.90   18.50 
 -11  -4  -6   11.40   20.00 
  11  -4   6  -12.20   18.30 
 -11  -4  -6   -2.60   14.70 
 -11   4  -6    9.50   12.20 
 -11   4  -6    5.80   17.90 
  11   4   6  -31.30   21.70 
  11   4   6   -8.10   19.60 
 -10  -5   6   20.60   12.40 
 -10   5   6  -18.30   12.10 
  10   5  -6  -66.09   28.50 
  -9  -5   6  -12.10    9.70 
  -9  -5   6    8.40   10.20 
   9   5  -6  -16.30   17.90 
   8  -5  -6   57.29   23.80 
  -8  -5   6   20.70   11.50 
  -8  -5   6   21.30   13.10 
   8   5  -6  -15.50   14.10 
   7  -5  -6   37.50   21.50 
  -7  -5   6   18.00   12.60 
  -7  -5   6   -8.40   11.10 
   7  -5  -6   17.00   12.00 
   7   5  -6   11.30   20.10 
   6  -5  -6   27.80   20.90 
  -6  -5   6   21.00   13.80 
  -6  -5   6   27.50   15.60 
   5  -5  -6   39.70   19.50 
   5  -5  -6   17.90   13.40 
  -5  -5   6   25.00   13.20 
  -4  -5   6    1.60   10.30 
   4  -5  -6   16.90   13.10 
  -4  -5   6   15.40   16.20 
   4  -5  -6   41.00   17.70 
   3  -5  -6   28.70   12.40 
  -3  -5   6   16.50   10.50 
  -3  -5   6   -0.80   16.90 
   3  -5  -6   -3.30   15.10 
   2  -5  -6   16.30   15.00 
  -2  -5   6   15.80   10.80 
  -2  -5   6   49.10   23.60 
   2  -5  -6   13.10   13.00 
   1  -5  -6  -30.80   12.00 
  -1  -5   6    0.70   10.20 
  -1  -5   6    5.80   18.00 
   1  -5  -6    8.40   13.30 
   0  -5  -6   -9.50   12.10 
   0  -5   6   24.60   18.20 
   0  -5   6    4.40    9.80 
   0  -5  -6    3.70   12.50 
  -1  -5  -6   59.29   18.80 
   1  -5   6   68.89   16.90 
  -1  -5  -6   56.69   20.30 
  -2  -5  -6  123.39   25.20 
   2  -5   6   93.59   22.50 
  -2  -5  -6   69.29   21.40 
  -3  -5  -6   11.70   15.10 
   3  -5   6   31.70   23.00 
  -3  -5  -6   -9.20    9.50 
   4  -5   6   39.00   25.90 
  -4  -5  -6   -3.30   16.80 
  -5  -5  -6   16.30   19.10 
   5  -5   6   26.80   27.90 
  -6  -5  -6    2.20   18.70 
   6  -5   6   -9.40   29.70 
  -6   5  -6   -1.60    9.40 
  -8  -5  -6   -3.50    7.60 
  -8   5  -6  -16.20   12.50 
   8   5   6   17.90   20.20 
   3  -6  -6   32.30   24.70 
  -3  -6   6   98.29   28.70 
   2  -6  -6   66.89   32.00 
   2  -6  -6  121.29   32.70 
  -2  -6   6  153.58   36.90 
  -1  -6   6   81.09   28.40 
  -1  -6   6    8.70   16.90 
   1  -6  -6   -8.30   21.70 
   1  -6  -6   37.00   21.00 
   0  -6   6   74.19   28.30 
   0  -6   6  -32.00   14.10 
   0  -6  -6    8.70   20.70 
   1  -6   6   37.40   30.00 
  -1  -6  -6   16.90   18.50 
   1  -6   6   13.00   15.50 
  -1  -6  -6    6.80   29.30 
  17   0  -7    2.40   19.90 
  17   0  -7   29.90   28.60 
 -17   0   7    1.50   18.90 
  16   0  -7   31.10   16.80 
  16   0  -7   24.10   25.20 
 -16   0   7    7.30   16.40 
 -16   0   7   16.60   15.40 
 -15   0   7   17.50   14.10 
 -15   0   7   10.80   11.50 
  15   0  -7   34.70   21.60 
  15   0  -7  -16.40   14.70 
  14   0  -7   -5.00   12.70 
 -14   0   7   -8.40   10.70 
 -14   0   7   10.60   10.50 
  14   0  -7    5.40   18.30 
  13   0  -7  -18.70   13.60 
 -13   0   7    8.00   12.80 
  13   0  -7    0.30   11.10 
 -13   0   7  -11.50    7.30 
 -12   0   7   -1.20    7.20 
  12   0  -7   -8.70    8.20 
  12   0  -7   -1.40   11.90 
 -12   0   7    7.30   11.50 
 -11   0   7   -1.30    7.30 
  11   0  -7   29.70   14.90 
 -11   0   7    1.00    6.60 
  11   0  -7    8.10    8.40 
 -10   0   7   24.40    7.30 
  10   0  -7   21.00   10.40 
  10   0  -7    3.60    4.40 
 -10   0   7    1.00    6.30 
 -10   0   7    5.00    6.30 
  10   0  -7    2.00    7.20 
   9   0  -7    3.20    8.40 
   9   0  -7   -1.30    5.10 
  -9   0   7    0.70    5.60 
  -9   0   7    2.30    5.70 
  -9   0   7    1.00    4.80 
  -8   0   7   12.90    6.10 
   8   0  -7   23.60    5.20 
  -8   0   7    6.20    6.90 
  -8   0   7    6.70    6.40 
   8   0  -7   33.80   12.30 
   8   0  -7    2.50    4.40 
  -7   0   7    3.70    5.30 
   7   0  -7    2.80    9.80 
   7   0  -7    1.10    4.10 
  -7   0   7    3.20    5.50 
  -7   0   7    0.10    6.60 
   7   0  -7    0.00    3.60 
  -6   0   7    6.00    6.60 
  -6   0   7    0.20    4.80 
   6   0  -7    0.00    4.40 
  -6   0   7    1.20    4.80 
   6   0  -7   -0.50    3.60 
   6   0  -7   -9.20    8.70 
   5   0  -7    0.30    3.00 
  -5   0   7   -5.90    5.30 
   5   0  -7    1.40    5.00 
  -5   0   7    1.30    4.10 
  -5   0   7    0.10    4.40 
   5   0  -7   10.80    9.00 
  -4   0   7   -0.70    4.60 
   4   0  -7    6.80    8.70 
  -4   0   7   -0.80    4.80 
   4   0  -7    0.40    4.20 
  -3   0   7   -3.90    6.20 
   3   0  -7    6.50    8.10 
  -3   0   7    1.00    4.90 
   3   0  -7   -0.40    3.40 
  -2   0   7   -1.20    4.30 
   2   0  -7    0.90    3.90 
   2   0  -7    4.10    8.70 
  -2   0   7    1.30    7.60 
  -1   0   7   -2.30    6.50 
  -1   0   7    1.10    4.70 
   1   0  -7    0.40    7.90 
   1   0  -7    1.60    3.90 
   0   0   7    8.40    6.30 
   0   0  -7    9.70    9.50 
   0   0  -7   12.20    4.50 
   0   0   7    8.50    5.20 
  -1   0  -7    2.80    3.90 
  -1   0  -7    4.30    8.00 
   1   0   7    0.70    4.20 
   1   0   7    1.30    5.60 
   2   0   7   -1.00    4.40 
  -2   0  -7    0.40    3.30 
   2   0   7    6.40    6.50 
  -2   0  -7    5.70    9.00 
   3   0   7   -3.20    5.00 
  -3   0  -7   -2.90    7.60 
  -3   0  -7    0.30    3.60 
   3   0   7    0.50    5.20 
   4   0   7   -1.20    4.90 
  -4   0  -7   -1.70    3.60 
  -4   0  -7    8.20    8.30 
   4   0   7    2.10    5.20 
   5   0   7   -1.60    4.70 
  -5   0  -7   10.30    8.40 
  -5   0  -7    5.40    4.00 
   5   0   7    0.30    5.70 
  -6   0  -7    3.90    4.00 
   6   0   7    8.10    6.10 
   6   0   7    4.40    5.80 
  -6   0  -7   20.60    9.20 
  -7   0  -7    6.70    4.90 
   7   0   7   13.50    7.90 
   7   0   7    6.30    5.70 
  -7   0  -7   -2.60    8.90 
  -8   0  -7   -1.70    4.00 
   8   0   7   -1.70    6.50 
   8   0   7   -1.50    8.10 
  -8   0  -7   -1.00    8.50 
  -9   0  -7    8.60    8.60 
  -9   0  -7   -2.00    4.30 
   9   0   7    2.20    6.60 
   9   0   7    6.70    8.10 
 -10   0  -7    1.80    4.80 
 -10   0  -7   -2.40    9.90 
  10   0   7   17.20   10.80 
  10   0   7   -0.10    7.00 
 -11   0  -7    6.90   11.20 
 -11   0  -7    5.20    6.10 
  11   0   7  -10.00    9.20 
  11   0   7    2.10   11.40 
  12   0   7   18.20   14.50 
 -12   0  -7   14.90   13.40 
  12   0   7   -3.50   11.20 
 -13   0  -7   -8.80    7.80 
 -13   0  -7   -7.70   13.80 
  13   0   7   15.70   15.60 
  13   0   7   -1.20   12.70 
  13   0   7   12.70   14.90 
  14   0   7  -10.90   15.10 
  14   0   7   12.40   16.80 
  14   0   7    9.50   19.50 
 -14   0  -7  -13.90    9.20 
 -14   0  -7   37.50   17.60 
  15   0   7    5.10   16.60 
  15   0   7   37.60   17.90 
 -15   0  -7   -4.30   19.30 
 -15   0  -7   -9.80    9.40 
  15   0   7   42.30   24.30 
 -17  -1   7   15.20   16.20 
  17  -1  -7    2.10   27.70 
 -17   1   7  -32.50   16.40 
  17   1  -7   21.30   22.00 
  16  -1  -7   23.20   27.20 
  16  -1  -7   -2.50   18.60 
 -16  -1   7   22.00   15.20 
 -16  -1   7   16.60   14.90 
  16   1  -7   -0.70   18.70 
 -16   1   7   -6.00   15.50 
  16   1  -7   27.50   23.70 
 -16   1   7    7.90   16.60 
  15  -1  -7    2.50   21.60 
 -15  -1   7  -12.70   12.20 
  15  -1  -7   -6.30   14.70 
 -15  -1   7   14.50   13.10 
  15   1  -7    0.60   19.10 
 -15   1   7    0.20   14.20 
  15   1  -7    3.80   14.60 
 -15   1   7   15.50   12.70 
  14  -1  -7   -2.50   12.90 
 -14  -1   7   -5.20    8.50 
  14  -1  -7  -20.70   10.80 
  14  -1  -7   15.60   17.70 
 -14  -1   7    3.40   12.30 
  14   1  -7    5.90   12.10 
 -14   1   7   31.10   11.20 
  14   1  -7   12.40   16.70 
 -14   1   7   -7.20   11.00 
  13  -1  -7   39.60   17.20 
  13  -1  -7   12.50   11.40 
 -13  -1   7   29.40   12.20 
  13  -1  -7   25.80   11.00 
 -13  -1   7   15.80   10.70 
  13   1  -7   59.79   17.20 
 -13   1   7   24.80   12.70 
  13   1  -7   -3.30   11.40 
 -13   1   7   43.20   11.40 
 -12  -1   7    8.40    7.60 
  12  -1  -7   40.70   16.70 
  12  -1  -7   10.40   10.60 
  12  -1  -7   10.30    8.80 
 -12  -1   7   -1.50    7.70 
  12   1  -7   -1.80   11.70 
 -12   1   7   11.90    8.10 
  12   1  -7    5.80    8.90 
 -12   1   7   -4.40    7.40 
 -11  -1   7   47.00   10.30 
  11  -1  -7    8.50    9.80 
  11  -1  -7   23.40   13.60 
  11  -1  -7   43.10   11.10 
 -11  -1   7   35.10   10.40 
 -11  -1   7   14.20   10.00 
  11   1  -7   16.00   10.60 
  11   1  -7   37.80   15.00 
 -11   1   7   20.60   10.70 
 -11   1   7   25.20   13.40 
  10  -1  -7   12.40    8.40 
 -10  -1   7    3.30    6.90 
 -10  -1   7    2.00    4.90 
  10  -1  -7   19.50   11.50 
 -10  -1   7   11.40    7.00 
 -10  -1   7   -4.40    6.50 
  10  -1  -7    3.90    6.80 
 -10   1   7    3.70    7.70 
  10   1  -7   11.50    5.70 
  10   1  -7   -1.00    6.10 
 -10   1   7   13.20    7.30 
 -10   1   7   12.40    8.40 
   9  -1  -7    1.30    9.60 
  -9  -1   7    4.00    6.10 
  -9  -1   7   -2.80    4.20 
  -9  -1   7   -0.90    5.60 
  -9  -1   7    7.60    7.20 
   9  -1  -7    7.00    7.00 
   9  -1  -7    4.80    6.90 
   9   1  -7    1.20    8.40 
  -9   1   7   -3.30    5.00 
   9   1  -7    5.40   10.10 
   9   1  -7    0.10    5.10 
  -9   1   7    3.40    7.10 
  -9   1   7    8.90    5.70 
   8  -1  -7    4.90    5.20 
   8  -1  -7   16.20    7.80 
  -8  -1   7    9.10    4.40 
  -8  -1   7    4.80    6.70 
  -8  -1   7    8.10    6.00 
   8  -1  -7    7.70    8.70 
  -8  -1   7    9.70    5.50 
   8   1  -7    6.50    5.50 
  -8   1   7   12.70    7.20 
  -8   1   7   11.80    6.20 
   8   1  -7    5.20    5.10 
  -8   1   7    6.10    7.00 
   8   1  -7   22.10   10.40 
   7  -1  -7   57.59   14.60 
  -7  -1   7   43.50   11.20 
   7  -1  -7   42.40   12.00 
   7  -1  -7   43.50   12.10 
  -7  -1   7   39.30   10.10 
  -7  -1   7   38.60   12.80 
  -7  -1   7   58.19   12.10 
  -7   1   7   22.40   11.90 
  -7   1   7   56.09   12.20 
  -7   1   7   62.89   13.40 
   7   1  -7   64.89   15.80 
   7   1  -7   32.90   11.40 
   7   1  -7   50.09   11.50 
   6  -1  -7   97.59   19.00 
   6  -1  -7   97.89   21.10 
   6  -1  -7   67.79   18.30 
  -6  -1   7   84.69   18.80 
  -6  -1   7  100.49   18.30 
  -6  -1   7   71.09   19.00 
  -6   1   7   78.79   18.50 
  -6   1   7   84.79   18.80 
  -6   1   7   54.19   18.60 
   6   1  -7   71.49   18.30 
   6   1  -7   89.29   21.10 
   6   1  -7   75.89   18.20 
   5  -1  -7   54.59   15.20 
  -5  -1   7   40.60   13.60 
  -5  -1   7   52.69   12.80 
   5  -1  -7   39.30   11.70 
   5  -1  -7   51.89   12.60 
   5   1  -7   55.69   12.50 
   5   1  -7   81.79   16.70 
   5   1  -7   44.20   11.90 
  -5   1   7   49.30   12.20 
  -5   1   7   52.19   12.70 
  -5   1   7   41.20   13.00 
   4  -1  -7   26.10    7.90 
  -4  -1   7   14.20    7.20 
  -4  -1   7   29.70    7.60 
   4  -1  -7   12.80    6.00 
   4  -1  -7   25.40   11.40 
   4   1  -7   27.30   11.70 
  -4   1   7   23.70    7.10 
   4   1  -7   18.50    7.10 
  -4   1   7   21.30    8.00 
  -4   1   7   33.80    9.00 
   4   1  -7   20.10    6.80 
   3  -1  -7  116.39   27.90 
  -3  -1   7  139.89   28.20 
  -3  -1   7  120.29   28.70 
   3  -1  -7  131.59   29.80 
  -3   1   7  109.19   28.60 
  -3   1   7  120.49   28.10 
   3   1  -7  168.78   30.20 
   3   1  -7  127.59   27.90 
   3   1  -7  127.19   28.00 
  -3   1   7  142.79   28.10 
  -2  -1   7  127.99   25.90 
  -2  -1   7  106.89   26.60 
   2  -1  -7  112.69   25.70 
   2  -1  -7  119.49   27.60 
   2   1  -7  120.49   25.60 
  -2   1   7  107.49   26.40 
  -2   1   7   99.29   25.70 
  -2   1   7  126.49   25.90 
   2   1  -7  120.49   25.70 
   2   1  -7  136.99   27.90 
  -1  -1   7   23.80    8.50 
   1  -1  -7   15.90    5.50 
  -1  -1   7   20.40    6.30 
   1  -1  -7   17.10    9.40 
  -1   1   7   13.30    5.90 
  -1   1   7   27.30    7.00 
  -1   1   7   18.20    8.10 
   1   1  -7   18.30    5.40 
   1   1  -7   20.90   10.20 
   0  -1   7   55.59   11.00 
   0  -1   7   46.50   12.30 
   0  -1  -7   45.90   12.60 
   0  -1  -7   32.60   10.10 
   0   1  -7   45.60   12.80 
   0   1   7   47.00   10.60 
   0   1   7   50.19   13.00 
   0   1  -7   37.00   10.20 
   1  -1   7   87.19   20.40 
   1  -1   7  101.19   19.50 
  -1  -1  -7   76.69   18.90 
  -1  -1  -7   89.09   20.70 
   1   1   7   83.09   19.20 
  -1   1  -7   87.69   21.20 
   1   1   7   69.89   20.20 
  -1   1  -7   88.99   18.90 
   2  -1   7   14.80    6.40 
  -2  -1  -7   20.30    8.30 
   2  -1   7   13.10    5.50 
  -2  -1  -7    5.80    4.20 
  -2   1  -7    8.50    7.60 
   2   1   7   11.20    5.70 
   2   1   7   11.70    6.60 
  -2   1  -7   13.70    4.70 
  -3  -1  -7  375.26   80.29 
   3  -1   7  366.96   80.19 
  -3  -1  -7  360.46   79.69 
   3  -1   7  393.16   79.89 
   3   1   7  369.86   79.79 
  -3   1  -7  413.06   80.49 
  -3   1  -7  355.76   79.59 
   3   1   7  348.47   80.19 
  -4  -1  -7  155.08   38.40 
  -4  -1  -7  201.38   39.70 
   4  -1   7  210.98   39.10 
   4  -1   7  169.88   39.30 
   4   1   7  194.08   38.90 
   4   1   7  142.09   39.10 
  -4   1  -7  207.98   39.90 
  -4   1  -7  161.58   38.40 
  -5  -1  -7   69.69   15.00 
  -5  -1  -7   38.10   12.10 
   5  -1   7   54.39   14.50 
   5   1   7   39.60   12.80 
  -5   1  -7   82.19   15.50 
  -5   1  -7   53.89   12.60 
   6  -1   7    4.00    6.70 
   6  -1   7   20.00    8.30 
  -6  -1  -7   12.70    5.50 
  -6  -1  -7   22.50    9.10 
   6   1   7   25.10    9.00 
  -6   1  -7   14.60    6.10 
  -6   1  -7   39.70    9.80 
   6   1   7   17.40    8.20 
   7  -1   7   48.00   15.30 
  -7  -1  -7   42.30   15.00 
   7   1   7   56.49   15.20 
  -7   1  -7   62.79   17.40 
  -8  -1  -7   -0.60    8.90 
   8  -1   7    2.80    6.00 
  -8  -1  -7   -1.70    4.50 
   8  -1   7   -8.50    8.20 
  -8   1  -7    1.90    4.20 
   8   1   7    0.10    7.20 
   8   1   7  -11.90    7.80 
  -8   1  -7    5.50    9.10 
   9  -1   7   -1.10    6.90 
   9  -1   7   28.60   10.60 
  -9  -1  -7   -1.20    9.90 
  -9  -1  -7    0.50    4.90 
  -9   1  -7   -1.40    5.30 
  -9   1  -7    1.70   10.30 
   9   1   7    2.30    6.90 
   9   1   7   -4.90    9.40 
 -10  -1  -7   68.89   15.20 
  10  -1   7    7.70   10.00 
 -10  -1  -7    5.90    8.30 
  10  -1   7   68.79   14.30 
  10   1   7   27.80   12.00 
 -10   1  -7   25.60    9.30 
 -10   1  -7   43.00   14.20 
  10   1   7   21.20   12.10 
  11  -1   7   -8.10    8.60 
  11  -1   7    2.50   13.10 
 -11  -1  -7    3.50    6.70 
 -11  -1  -7    6.50   12.30 
  11   1   7    6.50   10.90 
 -11   1  -7    0.40   12.00 
  12  -1   7   15.90   13.10 
 -12  -1  -7  -15.30   10.90 
 -12  -1  -7   -1.50    7.90 
  12  -1   7   11.20   10.60 
  12   1   7    0.40   14.30 
 -12   1  -7    3.80    6.30 
  12   1   7    1.70   11.90 
 -12   1  -7   -2.40   12.40 
 -13  -1  -7  -11.00    7.20 
  13  -1   7    6.00   13.00 
 -13  -1  -7    8.60   13.00 
  13  -1   7   40.30   19.40 
 -13  -1  -7    1.20   13.60 
  13  -1   7  -21.60   17.40 
 -13   1  -7    5.00    9.10 
  13   1   7   34.70   16.00 
  13   1   7   12.60   12.60 
 -13   1  -7   24.40   16.40 
  14  -1   7   34.70   21.00 
  14  -1   7    3.30   18.10 
 -14  -1  -7   31.90   14.90 
 -14  -1  -7   -0.30    8.70 
 -14  -1  -7   -0.90   14.30 
  14  -1   7  -28.70   18.10 
  14   1   7    7.80   15.00 
 -14   1  -7  -19.80   15.10 
  14   1   7   35.80   18.10 
 -14   1  -7    4.10   11.60 
  15  -1   7  -21.70   18.80 
 -15  -1  -7    9.00   17.90 
 -15  -1  -7    2.40   10.30 
  15  -1   7  -19.90   23.30 
  15  -1   7   40.30   23.90 
 -15  -1  -7    1.10   17.60 
  15   1   7   -4.80   21.70 
 -15   1  -7    6.90   10.80 
 -16  -2   7   17.20   16.40 
  16  -2  -7   -9.80   16.40 
  16  -2  -7   22.40   24.50 
  16  -2  -7   18.60   29.40 
 -16  -2   7   40.30   19.90 
  16   2  -7   -9.50   23.00 
 -16   2   7   17.10   18.80 
  15  -2  -7   -3.80   22.70 
 -15  -2   7    7.70   14.40 
 -15  -2   7    9.50   16.50 
 -15  -2   7   21.10   16.60 
  15  -2  -7   -3.50   14.90 
  15   2  -7   34.20   19.70 
 -15   2   7   16.50   14.70 
  15   2  -7   -5.50   28.40 
 -15   2   7   17.00   13.90 
  14  -2  -7    7.30   23.00 
 -14  -2   7   17.00   11.40 
 -14  -2   7   20.70   13.90 
  14  -2  -7   -7.10   15.60 
 -14  -2   7  -25.00   13.70 
  14  -2  -7    9.90   12.00 
 -14   2   7   21.30   12.30 
  14   2  -7    7.60   18.60 
 -14   2   7    2.50   11.10 
  14   2  -7    1.50   18.80 
 -13  -2   7   26.00   12.00 
 -13  -2   7   -3.80   12.00 
 -13  -2   7   25.20   11.00 
  13  -2  -7   20.70   13.40 
  13  -2  -7    2.80   11.20 
  13  -2  -7   41.20   19.30 
 -13   2   7    1.80   11.50 
 -12  -2   7   12.90   10.70 
  12  -2  -7   12.60   10.90 
 -12  -2   7    2.00    8.50 
  12  -2  -7   28.30   14.90 
 -12  -2   7    2.70   10.00 
  12  -2  -7   13.00   10.60 
 -12   2   7   -4.30    8.70 
  12   2  -7   -6.30   12.10 
 -11  -2   7  -11.70    8.20 
  11  -2  -7    8.10   10.70 
 -11  -2   7   20.90   16.70 
  11  -2  -7   -6.60   12.30 
 -11  -2   7    4.50    7.80 
  11  -2  -7   -1.70    7.60 
  11   2  -7   -0.90    9.70 
 -11   2   7    0.50    9.00 
 -10  -2   7    6.50    8.00 
 -10  -2   7   -6.90    6.90 
  10  -2  -7    2.00    8.20 
 -10  -2   7    4.10    9.00 
  10  -2  -7    6.20   13.30 
  10   2  -7   16.40    8.10 
 -10   2   7    9.30    8.20 
  10   2  -7    4.40    8.30 
  10   2  -7   -6.10   11.10 
 -10   2   7    4.40    8.00 
   9  -2  -7   62.99   16.70 
  -9  -2   7   45.60   11.80 
  -9  -2   7   23.80   11.50 
   9  -2  -7   36.30   12.70 
  -9  -2   7   60.79   12.40 
   9  -2  -7   21.70   11.10 
  -9   2   7   34.80   13.90 
   9   2  -7   30.50   11.50 
  -9   2   7   28.00   11.50 
   9   2  -7   30.60   13.30 
  -9   2   7   44.10   11.20 
   9   2  -7   40.20   11.30 
   8  -2  -7   17.90   10.90 
  -8  -2   7   18.90    7.60 
  -8  -2   7   20.80    7.60 
  -8  -2   7    9.70    7.30 
   8  -2  -7   12.70    6.50 
   8  -2  -7   11.70    9.60 
  -8   2   7   11.60    9.70 
   8   2  -7   13.60    7.70 
  -8   2   7   17.00    8.10 
   8   2  -7   31.60   11.30 
  -8   2   7   15.00    7.20 
   8   2  -7    6.70    6.40 
   7  -2  -7   58.19   13.40 
  -7  -2   7   34.40   12.30 
  -7  -2   7   57.09   11.90 
   7  -2  -7   25.20   10.60 
   7   2  -7   52.69   14.10 
  -7   2   7   33.10   11.70 
  -7   2   7   49.20   11.20 
   7   2  -7   34.10   11.00 
  -7   2   7   29.10   12.50 
   7   2  -7   42.30   11.40 
  -6  -2   7   42.20   10.20 
  -6  -2   7   39.50    9.90 
   6  -2  -7   48.30   12.50 
   6  -2  -7   50.19   12.40 
  -6  -2   7   22.50   10.10 
  -6   2   7   35.40    9.40 
  -6   2   7   27.50   10.30 
   6   2  -7   18.00    8.90 
   6   2  -7   38.30   12.80 
  -5  -2   7   67.89   14.70 
   5  -2  -7   67.89   16.70 
   5  -2  -7   70.49   16.00 
  -5  -2   7   75.49   14.70 
   5   2  -7   38.60   13.50 
   5   2  -7   49.10   14.10 
   5   2  -7   63.69   17.00 
  -5   2   7   61.59   13.90 
  -5   2   7   40.20   14.30 
  -5   2   7   54.59   15.60 
  -4  -2   7  101.89   27.80 
   4  -2  -7  102.79   27.20 
  -4  -2   7  131.39   27.60 
   4  -2  -7  162.18   29.50 
   4  -2  -7  134.19   28.10 
  -4  -2   7  147.09   27.80 
  -4   2   7  101.79   27.70 
   4   2  -7  110.39   27.50 
  -4   2   7  113.69   27.90 
  -4   2   7  148.09   27.60 
   4   2  -7  168.48   29.60 
   4   2  -7  125.19   27.40 
   3  -2  -7   36.80   11.30 
  -3  -2   7   53.59   12.80 
  -3  -2   7   54.99   12.30 
  -3  -2   7   59.49   12.00 
   3  -2  -7   82.49   15.10 
   3  -2  -7   48.20   13.20 
   3   2  -7   51.69   12.10 
  -3   2   7   40.60   12.40 
  -3   2   7   46.80   11.60 
   3   2  -7   42.30   11.40 
  -3   2   7   47.40   12.90 
   2  -2  -7    2.00    3.10 
  -2  -2   7    3.30    5.70 
  -2  -2   7    9.60    5.10 
   2  -2  -7    8.40    7.30 
  -2  -2   7    4.00    4.50 
   2  -2  -7    0.30    7.70 
   2   2  -7    5.00    5.10 
   2   2  -7   -3.90    8.00 
  -2   2   7    3.00    4.50 
  -2   2   7    1.20    6.80 
  -2   2   7    6.30    4.30 
   2   2  -7    0.00    3.00 
   1  -2  -7  123.49   28.10 
  -1  -2   7  140.49   27.10 
  -1  -2   7  112.69   27.60 
   1  -2  -7  146.69   27.50 
   1  -2  -7  118.29   26.90 
   1   2  -7  130.29   27.30 
  -1   2   7  118.49   27.40 
  -1   2   7   98.29   27.30 
   1   2  -7  117.29   26.90 
   1   2  -7  123.89   28.90 
   0  -2  -7   61.89   15.40 
   0  -2   7   79.99   15.90 
   0  -2  -7   49.99   13.30 
   0  -2   7   69.29   13.80 
   0   2  -7   64.19   13.90 
   0   2   7   49.20   14.40 
   0   2  -7   57.99   13.40 
   0   2   7   57.59   14.10 
   0   2   7   58.29   13.70 
  -1  -2  -7  132.09   32.20 
   1  -2   7  171.38   32.50 
   1  -2   7  147.29   33.30 
  -1  -2  -7  165.58   33.10 
  -1   2  -7  143.99   32.30 
  -1   2  -7  141.19   32.30 
   1   2   7  131.79   33.00 
   1   2   7  145.79   32.40 
   1   2   7  157.88   32.60 
  -1   2  -7  162.18   33.50 
   2  -2   7  425.26   77.39 
  -2  -2  -7  298.17   77.09 
  -2  -2  -7  392.86   77.69 
   2  -2   7  351.96   77.69 
  -2   2  -7  355.66   77.09 
   2   2   7  324.77   77.59 
   2   2   7  346.27   77.19 
  -2   2  -7  423.76   77.99 
  -2   2  -7  354.16   77.09 
   2   2   7  354.16   77.19 
   3  -2   7   92.79   22.50 
  -3  -2  -7   86.29   21.50 
  -3   2  -7   97.69   21.50 
   3   2   7   82.39   22.70 
  -3   2  -7  106.19   21.50 
   3   2   7  115.69   22.10 
   4  -2   7   96.79   26.10 
  -4  -2  -7   96.99   25.00 
   4   2   7  144.39   25.70 
  -4   2  -7  112.59   24.80 
   4   2   7  122.29   25.00 
  -4   2  -7  114.39   25.10 
   4   2   7  102.99   26.60 
   5  -2   7   14.90    8.90 
   5  -2   7   29.40    8.70 
  -5  -2  -7   19.10    7.10 
  -5  -2  -7   49.80   10.70 
  -5   2  -7   20.10    7.20 
  -5   2  -7   20.40    6.70 
  -5   2  -7   32.20   10.00 
   5   2   7   28.80    7.40 
   5   2   7    9.40    8.50 
   5   2   7   31.90    8.80 
   6  -2   7   27.00   10.50 
  -6  -2  -7   17.30    6.80 
  -6  -2  -7   40.10   10.60 
   6  -2   7   25.50   10.10 
  -6   2  -7   15.60    7.20 
   6   2   7   23.70    7.00 
   6   2   7   26.50   10.20 
  -6   2  -7   22.20    6.30 
  -6   2  -7   48.30   12.70 
   6   2   7   26.10    8.60 
  -7  -2  -7   -0.70    3.80 
   7  -2   7    1.50    6.40 
  -7  -2  -7   -3.10    8.40 
   7  -2   7    2.50    6.80 
   7   2   7    9.90    9.10 
   7   2   7    4.20    7.50 
   7   2   7    5.10    4.40 
  -7   2  -7   -0.50    4.40 
  -8  -2  -7   34.50   10.00 
   8  -2   7   14.60    9.40 
   8   2   7    2.50    8.50 
  -8   2  -7    5.30    5.60 
   8   2   7    2.00    9.10 
  -8   2  -7   18.20   10.30 
  -9  -2  -7    6.40    5.60 
   9  -2   7   19.50   10.20 
  -9  -2  -7   38.70   10.40 
   9  -2   7   -7.10    8.40 
   9   2   7    5.10    4.90 
  -9   2  -7   11.20    6.50 
   9   2   7    1.10    9.10 
  -9   2  -7    2.40   10.70 
   9   2   7   -2.00   10.20 
 -10  -2  -7    4.00    6.90 
  10  -2   7   36.00   12.10 
 -10  -2  -7   -7.90   11.00 
  10  -2   7    1.30    9.40 
 -10   2  -7   -1.30    6.50 
  10   2   7    7.10   11.80 
  11  -2   7   16.30   12.90 
 -11  -2  -7   15.80   11.30 
 -11  -2  -7   10.40    7.70 
  11  -2   7   13.50   13.40 
  11   2   7   13.70   13.10 
 -11   2  -7    5.50    7.30 
 -12  -2  -7    3.20   14.30 
  12  -2   7   48.20   22.50 
 -12  -2  -7    2.50   12.70 
 -12  -2  -7   -2.60    7.90 
  12  -2   7  -32.90   15.90 
  12  -2   7    4.50   12.00 
  12   2   7   10.40   14.70 
 -12   2  -7    6.00    8.70 
  13  -2   7   32.60   19.80 
 -13  -2  -7   -1.80    8.50 
 -13  -2  -7  -17.10   14.90 
  13  -2   7   12.70   14.30 
  13   2   7  -19.10   17.20 
 -13   2  -7   -4.20    8.90 
  13   2   7    3.10   16.40 
 -13   2  -7  -10.50   17.70 
 -14  -2  -7   14.90   12.00 
  14  -2   7   -3.00   23.30 
 -14  -2  -7  -36.80   15.00 
  14  -2   7   37.80   26.70 
  14  -2   7   -0.30   19.50 
 -14   2  -7   -3.90   11.00 
  14   2   7   14.20   18.60 
 -15  -3   7  -36.40   21.60 
  15  -3  -7   14.10   35.00 
  15  -3  -7    7.70   30.00 
 -15  -3   7   19.70   17.60 
  15  -3  -7   57.69   20.00 
 -15   3   7   19.60   17.00 
  15   3  -7   34.60   25.80 
  14  -3  -7   38.20   17.30 
 -14  -3   7  -16.50   14.60 
 -14  -3   7   22.30   18.60 
  14  -3  -7   38.00   26.00 
  14  -3  -7  -24.90   16.60 
 -14  -3   7   -5.50   14.00 
  14   3  -7    7.00   18.50 
  14   3  -7  -62.09   31.40 
 -14   3   7   35.90   15.90 
 -13  -3   7    3.10   14.10 
  13  -3  -7  -19.10   13.40 
  13  -3  -7  -11.50   19.90 
  13  -3  -7   25.80   15.80 
 -13  -3   7   33.20   13.20 
 -13  -3   7   15.10   13.60 
 -13   3   7   24.50   13.10 
  13   3  -7   51.79   24.70 
 -13   3   7   -4.40   12.50 
  13   3  -7  -12.50   15.50 
  12  -3  -7   24.40   18.30 
  12  -3  -7    5.50   12.30 
 -12  -3   7   -3.60   11.10 
  12  -3  -7   23.70   19.80 
 -12  -3   7   17.30   12.80 
  12   3  -7   -2.30   18.90 
 -12   3   7   11.20   11.50 
  12   3  -7   -8.30   14.60 
 -12   3   7    5.50   11.10 
 -11  -3   7    6.50   10.60 
 -11  -3   7    3.80   12.40 
  11  -3  -7    8.00   16.70 
  11  -3  -7   -0.20   10.40 
 -11  -3   7   10.40    9.80 
  11   3  -7   -4.50   10.60 
 -11   3   7   -3.00    9.80 
  10  -3  -7   18.70   13.10 
  10  -3  -7   11.90   15.60 
 -10  -3   7   28.60   10.00 
  10  -3  -7   16.90   10.50 
 -10  -3   7   33.70   11.40 
 -10  -3   7   15.70   10.30 
 -10   3   7   15.90    9.80 
  10   3  -7   -4.80   15.90 
 -10   3   7    8.00   10.10 
  10   3  -7   11.20   11.00 
  -9  -3   7    4.60    8.50 
   9  -3  -7   -8.40    8.00 
  -9  -3   7   -3.10    7.70 
   9  -3  -7    5.00   11.60 
   9  -3  -7    8.90   13.10 
  -9  -3   7    4.30    9.40 
  -9   3   7   -0.20    7.00 
  -9   3   7   -7.10    8.10 
   9   3  -7   14.00   19.90 
   9   3  -7    8.30    9.50 
   9   3  -7   12.20   10.30 
  -8  -3   7   -4.40    6.50 
   8  -3  -7   -2.70   10.10 
   8  -3  -7    8.10    7.30 
  -8  -3   7    1.20    7.20 
   8  -3  -7   13.10   12.60 
  -8  -3   7   -4.00    6.70 
   8   3  -7   -2.20    7.40 
  -8   3   7    3.40    7.30 
  -8   3   7    5.90    6.10 
   8   3  -7    1.30   12.50 
   8   3  -7    1.10    6.70 
  -7  -3   7   10.60    8.60 
  -7  -3   7   21.20    8.20 
   7  -3  -7   28.70   11.70 
   7  -3  -7   31.20   12.60 
   7  -3  -7   16.70    8.80 
  -7  -3   7   18.00    8.30 
  -7   3   7   14.00    7.10 
  -7   3   7   22.40    8.80 
   7   3  -7   16.60    9.20 
   7   3  -7   12.10    8.80 
  -6  -3   7   25.00    7.60 
   6  -3  -7   19.80   10.80 
   6  -3  -7   12.40    6.90 
  -6  -3   7   16.00    7.60 
   6  -3  -7   26.40   11.30 
  -6  -3   7   19.50    6.80 
   6  -3  -7   12.50    6.90 
   6   3  -7   10.90    8.20 
   6   3  -7   12.80    7.60 
  -6   3   7    2.70    6.80 
  -6   3   7   12.20   10.80 
  -6   3   7   18.20    6.40 
   6   3  -7   10.80   11.80 
   5  -3  -7    7.10    9.10 
  -5  -3   7    2.40    5.20 
   5  -3  -7    4.00    4.50 
  -5  -3   7   10.00    6.90 
  -5  -3   7    8.90    6.00 
   5  -3  -7   15.30   10.30 
  -5   3   7    9.90    5.80 
   5   3  -7    5.00    5.10 
   5   3  -7    3.00    6.60 
  -5   3   7    9.60    9.30 
  -5   3   7    3.80    4.80 
   5   3  -7   10.30   10.00 
  -4  -3   7   20.70    6.30 
  -4  -3   7   29.50    8.10 
   4  -3  -7    9.20    5.60 
   4  -3  -7    9.50    8.80 
   4  -3  -7   20.00   10.40 
  -4  -3   7    8.40    6.80 
  -4   3   7   14.70   10.10 
   4   3  -7   25.50   10.50 
   4   3  -7   19.50    6.20 
   4   3  -7   12.10    7.00 
  -4   3   7   16.10    5.40 
  -3  -3   7   42.90   10.80 
  -3  -3   7   37.20    8.90 
   3  -3  -7   44.70   12.70 
   3  -3  -7   31.00    8.20 
   3  -3  -7   34.20   13.30 
   3   3  -7   28.60   12.90 
  -3   3   7   28.70   12.10 
   3   3  -7   23.60    8.30 
   3   3  -7   28.60   10.60 
  -3   3   7   31.80    8.30 
  -2  -3   7   50.09   12.20 
  -2  -3   7   48.60   13.50 
  -2  -3   7   61.49   13.80 
   2  -3  -7   57.89   14.80 
   2   3  -7   41.20   13.50 
  -2   3   7   38.40   14.80 
   2   3  -7   66.99   14.80 
   1  -3  -7   73.79   18.30 
  -1  -3   7   90.19   17.90 
  -1  -3   7   84.59   17.00 
  -1  -3   7   79.49   18.40 
   1   3  -7   55.69   17.90 
   1   3  -7  102.89   18.90 
  -1   3   7   53.39   18.00 
  -1   3   7   77.99   16.90 
   0  -3   7   11.40    6.40 
   0  -3  -7    7.60    7.20 
   0  -3   7   16.70    6.10 
   0  -3   7   13.60    4.70 
   0   3   7   14.90    4.50 
   0   3  -7   18.30    6.80 
   0   3  -7    4.90    5.50 
   0   3   7    6.30    7.10 
  -1  -3  -7    4.70    3.20 
  -1  -3  -7    6.50    7.20 
  -1  -3  -7   -1.20    6.00 
   1  -3   7    3.40    6.80 
   1  -3   7    8.40    4.40 
  -1   3  -7    6.30    6.20 
  -1   3  -7   -0.20    2.60 
   1   3   7    1.30    4.00 
  -1   3  -7    4.80    5.60 
   1   3   7    5.90    7.90 
  -2  -3  -7    4.70    3.60 
   2  -3   7    8.00    7.30 
   2  -3   7   22.10    5.70 
  -2  -3  -7    8.50    6.00 
   2   3   7    4.30    5.90 
   2   3   7   11.10    5.40 
  -2   3  -7    8.70    3.90 
  -2   3  -7    4.90    6.90 
  -2   3  -7    7.40    7.10 
   2   3   7    9.30    7.10 
   3  -3   7   13.10    7.80 
  -3  -3  -7   32.00    7.80 
   3  -3   7   20.60    6.10 
  -3   3  -7   22.50    8.30 
   3   3   7   15.00    5.90 
   3   3   7    2.90    7.20 
  -3   3  -7    2.20    6.10 
   3   3   7    6.80    6.90 
  -3   3  -7    8.90    4.90 
   4  -3   7   41.40    9.10 
  -4  -3  -7   10.80    5.70 
  -4  -3  -7   36.70    8.90 
   4  -3   7   15.00    8.60 
   4   3   7   24.30    8.60 
  -4   3  -7   17.60    6.00 
  -4   3  -7   16.40    7.00 
   4   3   7   26.20    8.00 
   4   3   7   10.10    8.80 
  -5  -3  -7    6.90    5.30 
   5  -3   7   13.60    7.70 
   5  -3   7   23.50    7.90 
  -5  -3  -7   36.20    9.50 
   5   3   7   -0.80    9.40 
   5   3   7   37.60    8.90 
  -5   3  -7    9.40    5.50 
  -5   3  -7   10.20    6.20 
  -5   3  -7   27.50   10.70 
   5   3   7   19.10    8.50 
   6  -3   7   39.30   10.40 
   6  -3   7   13.60   10.40 
  -6  -3  -7   35.30   10.80 
  -6  -3  -7   15.40    7.20 
   6   3   7   29.80    9.40 
  -6   3  -7   20.70    7.60 
   6   3   7   15.00   11.20 
  -6   3  -7   11.00    7.20 
   6   3   7   43.00   11.10 
  -7  -3  -7   38.20   10.30 
  -7  -3  -7    8.90    6.50 
   7  -3   7   30.50   10.40 
   7  -3   7    5.20    9.50 
  -7   3  -7   18.60    7.50 
   7   3   7   -0.60    9.40 
   7   3   7    9.30   11.10 
  -7   3  -7   27.90   11.80 
   7   3   7   16.30    8.20 
  -8  -3  -7    9.30    6.00 
   8  -3   7   12.60   10.40 
  -8  -3  -7    7.20   10.10 
   8  -3   7   26.80   11.90 
  -8  -3  -7   -8.60   11.20 
   8   3   7    5.00   10.90 
   8   3   7    6.00   10.20 
   8   3   7   12.40    7.40 
  -8   3  -7   17.60   11.50 
  -8   3  -7    7.50    6.10 
   9  -3   7    6.40   11.00 
   9  -3   7   28.70   12.40 
  -9  -3  -7    5.20    6.40 
  -9  -3  -7    1.30   10.50 
  -9  -3  -7    5.10   18.00 
  -9   3  -7    0.70    7.00 
   9   3   7   -0.70   11.40 
 -10  -3  -7    4.90    7.00 
  10  -3   7  -10.90   13.30 
 -10  -3  -7    8.10   11.10 
 -10   3  -7   10.00    8.00 
  10   3   7    9.30   13.40 
  10   3   7   -6.90   14.10 
 -10   3  -7   -2.20   12.60 
  11  -3   7   -5.60   13.90 
 -11  -3  -7  -34.10   14.40 
 -11  -3  -7  -10.80   13.60 
  11  -3   7   30.60   22.90 
  11  -3   7    5.10   15.00 
 -11  -3  -7   -0.20    8.10 
 -11   3  -7   -4.50    8.00 
  11   3   7   12.70   16.90 
 -11   3  -7  -19.20   15.30 
  11   3   7  -11.50   14.90 
  12  -3   7   16.40   26.40 
  12  -3   7   19.40   18.90 
 -12  -3  -7    5.00    9.80 
  12  -3   7   23.70   16.60 
 -12  -3  -7   -0.10   14.60 
 -12  -3  -7   -4.50   17.50 
 -12   3  -7   19.80    9.90 
  12   3   7   26.40   17.40 
 -12   3  -7  -11.10   16.10 
  12   3   7    9.70   18.80 
  13  -3   7   26.90   22.10 
  13  -3   7   31.80   19.50 
 -13  -3  -7   -8.80   17.70 
 -13  -3  -7   17.60   12.10 
 -13  -3  -7   40.80   20.90 
  13   3   7    9.70   21.50 
 -13   3  -7   18.30   11.60 
  13  -4  -7   -7.80   18.60 
 -13  -4   7   -0.50   15.30 
 -13   4   7   11.60   16.80 
  13   4  -7   -9.10   21.00 
 -12  -4   7   18.80   13.60 
  12  -4  -7    1.80   15.80 
 -12  -4   7   47.80   15.60 
 -12  -4   7  -17.00   12.00 
  12  -4  -7  -41.80   24.90 
  12   4  -7   41.20   19.80 
 -12   4   7   -2.40   13.40 
  11  -4  -7    4.80   14.70 
 -11  -4   7    9.20   12.10 
  11  -4  -7   51.29   19.50 
 -11  -4   7   19.00   13.70 
 -11  -4   7    0.50   10.70 
  11  -4  -7  -17.70   21.20 
  11   4  -7  -23.10   16.10 
  11   4  -7  -22.40   24.90 
 -11   4   7   -1.10   11.90 
 -11   4   7   -5.10   11.10 
 -10  -4   7   30.70   10.90 
  10  -4  -7   -1.50   13.10 
  10  -4  -7   27.60   17.90 
 -10  -4   7    7.90   11.70 
  10  -4  -7   15.80   21.20 
 -10  -4   7   35.80   12.10 
  10   4  -7  -13.70   14.20 
 -10   4   7   13.70   10.90 
  -9  -4   7    7.90    8.70 
   9  -4  -7    4.60   17.50 
  -9  -4   7    9.10   10.00 
  -9  -4   7   10.10   10.00 
   9  -4  -7    4.50   10.90 
   9  -4  -7   47.00   17.30 
   9   4  -7   -4.60   11.50 
  -9   4   7   18.70    9.50 
  -9   4   7   22.10   10.60 
  -8  -4   7   -3.20    7.90 
   8  -4  -7    4.60    9.30 
  -8  -4   7   10.10    9.60 
   8  -4  -7   24.10   15.60 
  -8  -4   7   15.80    9.40 
  -8  -4   7    9.20    8.70 
  -8   4   7    1.60    8.10 
   8   4  -7   25.60   16.70 
  -8   4   7   11.10    8.00 
   8   4  -7   -0.10   11.10 
  -7  -4   7   12.30    7.00 
   7  -4  -7   33.00   15.40 
  -7  -4   7    3.50    8.30 
  -7  -4   7    7.20   10.20 
   7  -4  -7    3.80    8.30 
   7  -4  -7   -1.20    8.40 
   7   4  -7   -8.50    8.60 
  -7   4   7   10.80    7.00 
  -7   4   7   -2.90    7.20 
   7   4  -7  -16.70   15.40 
   6  -4  -7   -3.10    8.30 
  -6  -4   7   16.70    7.10 
  -6  -4   7   -1.30    7.40 
  -6  -4   7   -9.40   10.60 
   6   4  -7    7.90    9.60 
   6   4  -7   15.20   14.00 
  -6   4   7    7.90    5.70 
   6   4  -7   -3.70    7.00 
  -5  -4   7   40.70   14.60 
   5  -4  -7   50.89   16.70 
   5  -4  -7   35.10   12.10 
  -5  -4   7   39.30   10.30 
   5   4  -7   14.20   11.80 
   5   4  -7   38.00   16.40 
  -4  -4   7   19.20   12.90 
   4  -4  -7    4.40   12.80 
   4  -4  -7   15.10   10.10 
  -4  -4   7    4.10    8.60 
   4   4  -7   37.50   13.20 
   4   4  -7    3.90    8.80 
   3  -4  -7   32.80   10.40 
   3  -4  -7    1.80   11.30 
  -3  -4   7   -5.60    8.30 
   3   4  -7  -11.00    9.50 
  -3   4   7   10.60   12.10 
   3   4  -7    9.00    8.20 
  -2  -4   7    4.10    7.60 
   2  -4  -7    6.20   11.00 
   2  -4  -7   -2.30    9.30 
   2   4  -7    1.30    7.70 
   1  -4  -7   16.50   12.70 
  -1  -4   7   28.70    8.60 
   1  -4  -7   15.40   11.20 
  -1   4   7    8.60   18.40 
   0  -4  -7   -4.50   12.50 
   0  -4   7   -3.90    6.50 
   0   4  -7    8.40   13.80 
   0   4   7    6.10   10.40 
   1  -4   7   25.90    9.00 
  -1  -4  -7   -3.00   10.80 
  -1  -4  -7    5.90    8.80 
   1   4   7    2.90    9.90 
  -1   4  -7   -0.80    7.70 
  -2  -4  -7    0.70    8.00 
  -2  -4  -7   13.20   12.20 
   2   4   7   17.80   10.80 
  -2   4  -7    7.60    7.90 
  -3  -4  -7   16.40   12.30 
  -3   4  -7   13.80    8.10 
  -3   4  -7   -9.30    9.00 
   3   4   7    5.50    8.50 
   3   4   7    4.00   10.40 
   4  -4   7    3.30    9.90 
  -4  -4  -7   14.00   13.50 
   4  -4   7   10.90    8.80 
  -4   4  -7   16.00    9.30 
   4   4   7   15.10    9.30 
   4   4   7    9.70   11.20 
  -5  -4  -7    3.60    5.40 
  -5  -4  -7    9.40    7.70 
   5  -4   7   22.50   11.70 
   5  -4   7   35.80   10.30 
  -5   4  -7   20.90    9.50 
   5   4   7   14.50   11.20 
   5   4   7   26.90    9.90 
  -5   4  -7   34.10   11.50 
  -5   4  -7    8.20    6.40 
   5   4   7   12.90   10.90 
  -6  -4  -7   15.80    6.30 
   6  -4   7   14.70   10.70 
   6  -4   7    7.60   12.00 
  -6  -4  -7   17.10    8.80 
   6   4   7    1.60   12.00 
  -6   4  -7   32.80   11.70 
  -6   4  -7    7.90    9.50 
  -6   4  -7   12.60    6.70 
   6   4   7    9.50   11.20 
  -7  -4  -7    8.80    6.10 
   7  -4   7   -4.50   10.40 
   7  -4   7   -2.50   11.70 
  -7  -4  -7   -8.60    8.80 
   7   4   7   -3.70   11.50 
   7   4   7    6.30   12.60 
  -7   4  -7   -1.80    9.10 
  -7   4  -7    5.00   12.20 
  -7   4  -7    0.30    6.50 
   8  -4   7   15.40   12.40 
   8  -4   7   -1.00   13.50 
  -8  -4  -7    0.70    7.30 
   8  -4   7   13.50   23.10 
  -8  -4  -7   39.80   16.30 
  -8  -4  -7   17.60   10.90 
   8   4   7   16.90   14.80 
  -8   4  -7   -0.30    8.20 
  -9  -4  -7   33.60   18.20 
   9  -4   7   66.79   26.90 
   9  -4   7   15.00   14.80 
   9  -4   7    7.00   15.30 
  -9  -4  -7    0.70    8.30 
  -9  -4  -7    9.70   12.00 
  -9   4  -7    8.00   14.80 
   9   4   7   13.90   18.50 
   9   4   7    5.50   15.90 
  -9   4  -7    0.70    9.80 
  10  -4   7   28.60   19.70 
 -10  -4  -7   15.80   18.40 
  10  -4   7   10.50   17.10 
 -10  -4  -7   -3.80   12.70 
 -10  -4  -7    3.20    9.80 
  10   4   7    2.50   18.30 
 -10   4  -7    1.60   10.90 
  10   4   7    4.60   19.00 
 -10   4  -7   11.80   15.50 
 -11  -4  -7   14.60   11.00 
  11  -4   7   38.90   20.80 
  11  -4   7  -25.80   18.50 
 -11  -4  -7   18.00   15.20 
 -11   4  -7    3.70   11.40 
  11   4   7   -9.10   21.30 
  11   4   7   -3.20   21.50 
 -11   4  -7  -30.10   16.40 
 -10  -5   7   29.00   14.00 
  10   5  -7   -6.40   31.40 
  -9  -5   7    7.50   11.20 
  -9  -5   7   15.40   11.60 
  -9  -5   7   19.40   10.30 
   9   5  -7  -13.00   27.60 
  -8  -5   7   21.50   12.80 
   8  -5  -7   83.29   39.10 
  -8  -5   7   40.90   17.80 
   8   5  -7    7.00   29.20 
   8   5  -7   -1.50   14.90 
  -7  -5   7   19.10   14.20 
  -7  -5   7   29.50   14.10 
   7  -5  -7   33.90   13.30 
   7  -5  -7  -20.00   20.80 
   7   5  -7   60.99   21.80 
   6  -5  -7    7.10   19.70 
   6  -5  -7   23.10   14.20 
  -6  -5   7   -0.40   11.80 
  -6  -5   7   44.00   16.00 
   5  -5  -7   26.60   15.70 
   5  -5  -7   62.29   20.70 
  -5  -5   7   70.09   19.00 
  -5  -5   7   11.90   13.60 
  -4  -5   7   24.40   17.90 
  -4  -5   7   11.10   11.00 
   4  -5  -7   14.20   13.40 
   4  -5  -7   -2.30   16.10 
  -3  -5   7   11.70   10.20 
   3  -5  -7    1.80   12.80 
   3  -5  -7   19.10   15.50 
  -3  -5   7   22.70   17.70 
   2  -5  -7   17.30   14.60 
  -2  -5   7    8.30   10.80 
   2  -5  -7   19.50   13.50 
  -2  -5   7   24.20   19.00 
   1  -5  -7   16.00   13.60 
  -1  -5   7   42.30   19.60 
  -1  -5   7  -10.70    9.70 
   1  -5  -7   11.30   13.40 
   1   5  -7   11.30   12.50 
   0  -5   7   39.00   19.30 
   0  -5   7   21.20   10.50 
   0  -5  -7   -1.20   12.60 
   0  -5  -7   13.90   14.10 
   0   5  -7   19.70   12.00 
   1  -5   7   48.10   11.40 
   1  -5   7   -3.30   19.90 
  -1  -5  -7    1.90   12.40 
  -1  -5  -7   41.90   16.90 
  -1   5  -7   14.00   13.10 
   2  -5   7   86.99   25.50 
  -2  -5  -7   22.80   18.00 
  -2  -5  -7   40.10   15.10 
  -2   5  -7   56.19   16.40 
   3  -5   7   28.10   22.80 
  -3  -5  -7   33.50   17.30 
  -4  -5  -7   -0.30   17.40 
   4  -5   7   44.60   25.20 
  -5  -5  -7  -17.80   16.80 
   5  -5   7    0.90   24.60 
  -6  -5  -7  -20.20   17.10 
   6  -5   7  -14.00   28.80 
  -6   5  -7   15.70   10.60 
  -7   5  -7   14.20   13.50 
   8  -5   7   -9.40   19.00 
  -8   5  -7    0.10   13.70 
   8   5   7  -20.50   19.80 
   3  -6  -7   72.49   30.90 
  -3  -6   7  130.89   35.10 
  -2  -6   7   71.59   29.20 
   2  -6  -7   49.90   25.00 
   2  -6  -7   35.20   27.80 
   1  -6  -7   -6.40   21.70 
  -1  -6   7   14.10   19.60 
   1  -6  -7    7.90   20.50 
  -1  -6   7   89.59   29.50 
   0  -6   7   50.49   30.90 
   0  -6  -7   35.60   24.00 
   1  -6   7   35.40   37.30 
  17   0  -8   19.70   31.50 
  17   0  -8  -10.20   19.40 
 -17   0   8   26.50   18.00 
 -16   0   8    6.10   13.30 
  16   0  -8    2.60   16.20 
  16   0  -8  -44.50   22.50 
 -16   0   8   -0.40   16.40 
  15   0  -8   -2.10   16.50 
  15   0  -8    2.20   18.90 
 -15   0   8    7.10   11.60 
 -15   0   8   20.30   10.70 
  14   0  -8   31.70   17.40 
 -14   0   8   -6.30   10.40 
 -14   0   8    5.70   12.40 
  14   0  -8  -11.70   10.40 
  13   0  -8   -2.50    9.40 
 -13   0   8    4.50    8.70 
 -13   0   8   -0.50   10.20 
  13   0  -8  -13.20   15.00 
  12   0  -8   10.30   11.60 
 -12   0   8   13.50    9.60 
 -12   0   8   12.80    8.10 
  12   0  -8   -5.60    9.00 
 -11   0   8    4.50    7.10 
  11   0  -8    6.20    6.40 
 -11   0   8   -0.70    6.80 
 -11   0   8    4.30    9.30 
 -10   0   8    8.50    6.70 
 -10   0   8   32.00    9.10 
 -10   0   8    5.80    6.30 
  10   0  -8   14.20   10.70 
  10   0  -8   12.70    8.10 
   9   0  -8   84.59   21.90 
   9   0  -8   90.59   21.00 
  -9   0   8   83.99   21.10 
  -9   0   8   93.79   22.60 
   9   0  -8  136.09   25.40 
  -9   0   8  125.99   22.70 
   8   0  -8   61.09   16.10 
  -8   0   8   17.40   10.50 
   8   0  -8   34.20    9.50 
  -8   0   8   37.20   11.00 
  -8   0   8   52.49   11.20 
  -7   0   8    1.10    5.50 
  -7   0   8    8.00    5.60 
   7   0  -8   -0.20    3.50 
   7   0  -8   -5.60    9.20 
   7   0  -8    0.30    4.80 
  -7   0   8    1.30    4.80 
  -6   0   8   47.00   10.10 
  -6   0   8   11.10    8.50 
   6   0  -8   26.60    7.60 
  -6   0   8   42.00    8.80 
   6   0  -8   20.10    8.30 
   6   0  -8   34.50   12.70 
  -5   0   8   51.99   13.30 
   5   0  -8   45.90   12.40 
   5   0  -8   84.79   16.40 
  -5   0   8   36.00   12.80 
  -5   0   8   55.79   12.10 
  -4   0   8   90.79   20.40 
   4   0  -8  100.19   22.90 
   4   0  -8   83.09   19.90 
  -3   0   8   15.70    7.20 
  -3   0   8   12.00    6.00 
   3   0  -8   19.40    9.70 
   3   0  -8   12.40    5.00 
   2   0  -8   64.39   15.60 
   2   0  -8   50.19   13.00 
  -2   0   8   64.99   15.80 
  -2   0   8   56.09   13.50 
  -1   0   8  753.82  164.98 
  -1   0   8  788.72  164.48 
   1   0  -8  724.73  164.38 
   1   0  -8  827.22  165.28 
   0   0   8   48.70   12.60 
   0   0  -8   64.89   14.40 
   0   0   8   46.50   14.10 
   0   0  -8   47.60   11.80 
   1   0   8  367.46   76.89 
   1   0   8  352.96   77.39 
  -1   0  -8  356.46   76.79 
  -1   0  -8  355.26   77.69 
   2   0   8  247.58   52.89 
   2   0   8  257.67   53.49 
  -2   0  -8  225.98   52.69 
  -2   0  -8  255.67   53.99 
   3   0   8  138.79   28.40 
   3   0   8  119.79   28.80 
  -3   0  -8  137.39   29.40 
  -3   0  -8  117.59   27.90 
  -4   0  -8   14.20    5.30 
   4   0   8   22.00    7.60 
  -4   0  -8   28.40   10.60 
   4   0   8   14.10    7.30 
   5   0   8   89.09   21.80 
  -5   0  -8   79.79   20.40 
  -5   0  -8  127.29   23.30 
   6   0   8   37.70   11.10 
  -6   0  -8   67.19   14.90 
  -6   0  -8   34.40   10.80 
   6   0   8   36.10   13.10 
   7   0   8  462.85  101.39 
  -7   0  -8  478.45  101.89 
   8   0   8   34.40   11.40 
  -8   0  -8   19.90    9.20 
   8   0   8   54.79   12.30 
  -8   0  -8   82.59   15.80 
   9   0   8  -11.40    9.00 
  -9   0  -8    1.40   10.90 
  -9   0  -8    0.00    4.90 
   9   0   8    2.60    6.90 
 -10   0  -8    1.30    5.60 
 -10   0  -8    1.60   10.40 
  10   0   8   -0.70    9.60 
  10   0   8   -2.40    8.80 
  11   0   8   24.10   12.40 
 -11   0  -8   25.80   13.70 
  11   0   8   -5.80    8.50 
 -11   0  -8    2.60    5.60 
 -12   0  -8  -12.90   12.50 
  12   0   8   -9.40   14.00 
 -12   0  -8   -1.80    9.70 
 -13   0  -8    6.50    8.50 
  13   0   8    1.30   15.70 
  13   0   8    5.50   14.00 
 -13   0  -8   -3.70   14.20 
 -14   0  -8   18.30   10.10 
  14   0   8   21.80   19.10 
 -14   0  -8   20.10   17.60 
  14   0   8  -22.50   19.50 
  14   0   8   11.50   17.50 
  15   0   8   35.60   21.60 
 -15   0  -8   -4.40   19.90 
  15   0   8   25.60   25.90 
  15   0   8   14.60   21.30 
 -15   0  -8   15.10   13.40 
  17  -1  -8  -19.90   28.70 
 -17  -1   8   -6.50   17.10 
  17   1  -8   30.90   24.30 
 -17   1   8   18.00   21.50 
 -16  -1   8   -0.40   15.10 
  16  -1  -8   60.79   25.60 
 -16  -1   8   -8.10   13.20 
  16  -1  -8    7.20   19.30 
  16   1  -8   39.50   28.30 
 -16   1   8   -2.10   13.90 
  16   1  -8    1.30   18.90 
 -16   1   8   42.90   17.70 
  15  -1  -8   17.00   16.20 
 -15  -1   8   23.90   15.20 
  15  -1  -8    6.70   20.90 
 -15  -1   8    6.50   12.40 
 -15   1   8    3.40   12.10 
 -15   1   8    5.90   12.40 
  15   1  -8   -4.30   14.50 
  15   1  -8   21.60   24.50 
  14  -1  -8   -2.80   10.70 
  14  -1  -8  -17.30   17.20 
  14  -1  -8  -27.50   14.90 
 -14  -1   8    0.80    9.40 
 -14  -1   8    4.40   10.40 
 -14   1   8   11.10   12.80 
  14   1  -8    9.40   17.20 
  14   1  -8   -2.80   12.00 
 -14   1   8   -3.60   11.20 
 -13  -1   8   26.10   10.90 
  13  -1  -8   25.40   11.10 
  13  -1  -8   59.79   18.50 
  13  -1  -8   -7.80   11.50 
 -13  -1   8   23.90   11.40 
  13   1  -8   42.90   16.50 
 -13   1   8   15.60   10.90 
 -13   1   8   50.89   13.10 
  13   1  -8    7.90   12.80 
  12  -1  -8   -3.90    8.30 
 -12  -1   8    2.50    8.40 
 -12  -1   8    2.30    7.70 
  12  -1  -8    8.30    9.70 
  12  -1  -8    7.50   19.70 
  12   1  -8   -5.50    8.50 
 -12   1   8    8.40    8.10 
  12   1  -8   19.10   16.40 
 -12   1   8   -3.70    8.60 
  11  -1  -8   66.09   18.10 
 -11  -1   8   20.40   10.90 
 -11  -1   8   29.20    8.70 
 -11  -1   8   38.20   10.70 
  11  -1  -8   33.80   10.70 
  11  -1  -8   15.00   10.00 
  11   1  -8   25.50   11.00 
 -11   1   8   37.70   10.70 
  11   1  -8   21.40    9.40 
  11   1  -8   29.60   14.30 
 -11   1   8   13.50   11.40 
 -11   1   8   22.90   10.50 
  10  -1  -8   20.90   13.90 
 -10  -1   8   13.00    8.80 
  10  -1  -8   12.60    7.90 
 -10  -1   8   20.80    8.50 
  10  -1  -8   29.60    9.40 
 -10  -1   8   25.70    7.30 
 -10   1   8    7.10    7.90 
  10   1  -8   13.70    7.50 
 -10   1   8   23.30    8.50 
  10   1  -8   12.50    8.00 
  10   1  -8   18.70   13.60 
 -10   1   8   21.70   10.40 
   9  -1  -8   10.40   10.40 
  -9  -1   8   -0.40    5.90 
  -9  -1   8    1.70    5.40 
   9  -1  -8    4.10    5.60 
  -9  -1   8    3.40    4.30 
   9  -1  -8   12.70    7.80 
  -9   1   8    2.50    7.30 
   9   1  -8   -4.10   10.50 
  -9   1   8    4.50    6.50 
   9   1  -8   -4.40    5.80 
   9   1  -8    1.00    5.50 
  -9   1   8   -4.70    6.50 
   8  -1  -8   15.10    9.80 
   8  -1  -8   14.90    7.00 
  -8  -1   8    8.00    3.80 
  -8  -1   8    1.70    5.90 
  -8  -1   8    1.80    5.30 
   8  -1  -8    2.20    4.30 
  -8   1   8    7.60    6.80 
  -8   1   8   -3.30    6.00 
   8   1  -8   22.50   11.50 
   8   1  -8   -0.20    5.30 
  -8   1   8    2.50    6.20 
   8   1  -8   -1.00    5.20 
   7  -1  -8    8.20    5.20 
  -7  -1   8   13.20    5.00 
   7  -1  -8   26.40   10.80 
  -7  -1   8    9.70    6.30 
  -7  -1   8   24.80    7.00 
  -7   1   8   18.40    7.60 
   7   1  -8   37.90   11.80 
  -7   1   8   27.90    7.20 
   7   1  -8   10.90    5.50 
   7   1  -8    4.70    4.90 
   6  -1  -8   20.40   10.30 
  -6  -1   8   22.20    6.80 
  -6  -1   8    9.10    6.20 
   6  -1  -8    4.00    4.30 
   6   1  -8    6.80    5.40 
   6   1  -8   15.50    9.20 
  -6   1   8    3.20    5.80 
  -6   1   8    7.70    5.50 
   6   1  -8    4.70    4.30 
  -6   1   8   12.90    6.50 
   5  -1  -8   55.09   14.80 
  -5  -1   8   46.50   11.00 
   5  -1  -8   29.10   10.20 
   5  -1  -8   44.20   10.90 
  -5  -1   8   54.29   12.60 
  -5   1   8   35.50   11.00 
   5   1  -8   49.30   13.90 
  -5   1   8   41.40   11.80 
   5   1  -8   33.10   10.30 
   5   1  -8   47.40   11.00 
  -5   1   8   40.60   11.60 
   4  -1  -8   -1.60    8.80 
  -4  -1   8    9.80    6.20 
  -4  -1   8   23.10    6.90 
   4  -1  -8   11.30    4.80 
   4   1  -8   15.40    5.30 
   4   1  -8   11.00    4.90 
  -4   1   8   14.90    6.10 
   4   1  -8   24.30   11.50 
  -4   1   8   19.50    7.50 
  -4   1   8    7.00    6.30 
  -3  -1   8   63.89   14.20 
  -3  -1   8   83.29   16.60 
   3  -1  -8   46.50   13.70 
   3  -1  -8   84.69   17.30 
  -3   1   8   59.39   14.10 
  -3   1   8   58.59   14.00 
   3   1  -8   61.59   14.00 
  -3   1   8   69.29   15.70 
   3   1  -8   51.19   13.60 
  -2  -1   8  108.59   22.40 
   2  -1  -8  112.89   24.70 
   2  -1  -8   90.49   22.20 
  -2  -1   8   89.79   23.20 
   2   1  -8   97.39   22.10 
   2   1  -8  116.99   24.70 
  -2   1   8  100.59   22.30 
  -2   1   8  104.59   22.30 
   2   1  -8  102.29   22.00 
  -2   1   8   89.59   23.20 
  -1  -1   8    4.40    6.10 
   1  -1  -8    1.80    3.10 
   1  -1  -8    9.10    8.40 
  -1  -1   8    3.10    5.20 
  -1   1   8    6.20    4.60 
  -1   1   8    5.00    4.90 
  -1   1   8   -1.20    5.50 
   1   1  -8    9.40    9.50 
   1   1  -8    2.60    3.60 
   0  -1   8   50.29   10.10 
   0  -1   8   32.90   11.00 
   0  -1  -8   44.50   12.70 
   0  -1  -8   27.10    8.90 
   0   1  -8   35.90   11.80 
   0   1  -8   46.30    9.50 
   0   1   8   35.30   11.50 
   0   1   8   33.70    9.50 
   1  -1   8  218.18   43.60 
  -1  -1  -8  193.78   44.50 
   1  -1   8  191.68   44.30 
   1   1   8  185.38   44.30 
   1   1   8  196.78   43.60 
  -1   1  -8  221.58   44.90 
  -2  -1  -8   22.30    8.50 
   2  -1   8   35.80    7.60 
   2  -1   8   14.20    7.30 
  -2  -1  -8   13.20    5.70 
   2   1   8   16.80    8.10 
   2   1   8   20.50    6.90 
  -2   1  -8   20.40    6.00 
  -2   1  -8   28.80    9.70 
   3  -1   8  141.29   25.90 
   3  -1   8  114.79   26.40 
  -3  -1  -8  136.39   26.70 
  -3  -1  -8  100.39   25.20 
  -3   1  -8   96.89   25.10 
   3   1   8  117.89   25.70 
  -3   1  -8  130.29   26.90 
   3   1   8  103.69   26.10 
   4  -1   8  290.17   59.69 
   4  -1   8  249.97   59.89 
  -4  -1  -8  305.37   60.19 
  -4  -1  -8  259.57   59.29 
  -4   1  -8  249.68   59.19 
  -4   1  -8  330.97   60.49 
   4   1   8  231.68   59.89 
   4   1   8  305.37   59.69 
  -5  -1  -8   41.00   12.50 
  -5  -1  -8   82.79   16.00 
   5  -1   8   44.40   14.50 
   5   1   8   45.20   14.60 
   5   1   8   65.89   14.20 
  -5   1  -8   39.10   12.30 
  -5   1  -8   77.49   15.50 
   6  -1   8   78.89   19.70 
  -6  -1  -8  108.59   20.50 
   6  -1   8  100.39   18.90 
  -6  -1  -8   66.49   17.40 
  -6   1  -8   60.29   17.10 
  -7  -1  -8   -0.80    4.00 
   7  -1   8    9.70    8.00 
   7  -1   8    4.70    6.20 
  -7  -1  -8   -0.70    7.20 
   7   1   8    5.40    6.50 
   7   1   8   -5.30    6.00 
  -7   1  -8  -11.10    7.50 
  -7   1  -8    3.10    4.10 
   8  -1   8   17.10    8.00 
  -8  -1  -8   11.50    8.70 
  -8  -1  -8    4.70    4.40 
   8  -1   8   -6.60    7.80 
  -8   1  -8    2.30    4.60 
   8   1   8    1.90    6.50 
   9  -1   8   -0.60    9.30 
   9  -1   8   12.60   10.80 
  -9  -1  -8    6.90    9.90 
  -9  -1  -8    8.80    6.60 
   9   1   8    6.30    9.70 
   9   1   8    5.90    8.20 
  -9   1  -8    0.20   10.20 
  -9   1  -8    2.00    6.50 
 -10  -1  -8   -3.70    6.10 
  10  -1   8   -1.40    9.80 
 -10  -1  -8    8.00   13.20 
  10  -1   8   35.30   15.90 
  10   1   8   23.10   11.00 
 -10   1  -8    5.20    5.40 
  10   1   8    8.10    8.50 
 -10   1  -8   10.60   11.80 
  11  -1   8   20.60   14.10 
 -11  -1  -8   -6.70   11.00 
  11  -1   8   -0.30   12.20 
 -11  -1  -8    5.80    6.80 
  11   1   8    7.00   12.70 
 -11   1  -8   25.70   13.70 
  11   1   8    2.20   11.20 
 -11   1  -8   -3.50    6.60 
 -12  -1  -8  -10.60    7.10 
  12  -1   8    4.10   11.30 
 -12  -1  -8   -9.30   13.10 
  12  -1   8   27.20   15.30 
  12   1   8  -10.80   13.40 
 -12   1  -8    3.00    6.60 
  12   1   8    6.30   12.50 
 -12   1  -8  -13.50   13.30 
  13  -1   8   17.20   16.00 
 -13  -1  -8   14.70    8.20 
 -13  -1  -8   17.80   13.20 
  13  -1   8    5.90   20.40 
  13  -1   8   29.20   17.60 
 -13  -1  -8  -21.00   13.00 
  13   1   8   12.90   13.20 
  13   1   8    0.00   16.50 
 -13   1  -8    8.70    9.70 
 -13   1  -8    8.60   18.90 
 -14  -1  -8   28.30   17.10 
  14  -1   8   79.29   28.90 
  14  -1   8    3.10   14.00 
 -14  -1  -8   13.80   16.30 
 -14  -1  -8    1.20   10.30 
  14  -1   8  -16.20   19.70 
  14   1   8   18.10   18.50 
  14   1   8   27.00   13.60 
  14   1   8  -13.50   16.30 
 -14   1  -8   14.50    9.70 
 -14   1  -8   -8.50   16.20 
  15  -1   8   14.50   22.60 
 -15  -1  -8  -10.80   19.00 
 -15  -1  -8    5.10   11.90 
 -15  -1  -8  -23.50   17.70 
  15  -1   8   -5.70   17.60 
  15   1   8  -21.20   18.70 
 -15   1  -8   -7.30   10.80 
 -16  -2   8   -6.40   15.90 
  16  -2  -8   37.20   29.20 
 -16  -2   8   -4.80   27.50 
  16   2  -8   12.80   22.40 
 -16   2   8    1.80   19.30 
  15  -2  -8  -21.50   24.50 
 -15  -2   8    3.50   15.20 
 -15  -2   8   12.10   14.30 
  15  -2  -8   -5.40   15.30 
 -15   2   8   29.30   16.90 
  15   2  -8   25.80   19.70 
  15   2  -8   26.40   24.80 
 -15   2   8    3.60   15.10 
  14  -2  -8   19.40   14.80 
  14  -2  -8    4.10   12.90 
 -14  -2   8  -20.10   13.90 
 -14  -2   8   10.40   11.70 
  14  -2  -8  -22.10   22.30 
 -14  -2   8   38.40   12.50 
  14   2  -8   54.49   20.40 
 -14   2   8   -0.60   12.50 
  14   2  -8    4.30   15.60 
 -14   2   8    9.00   11.30 
 -13  -2   8   21.90   13.40 
 -13  -2   8   -9.00   11.90 
  13  -2  -8   16.90   17.80 
 -13  -2   8   28.90   11.20 
  13  -2  -8    7.30   11.00 
  13  -2  -8   11.30   12.80 
  13   2  -8    9.60   15.00 
 -13   2   8   19.60   11.80 
  12  -2  -8    9.70    9.60 
  12  -2  -8    1.00   10.20 
 -12  -2   8    8.10   11.70 
  12  -2  -8   -9.10   15.20 
 -12  -2   8    6.50    9.90 
 -12  -2   8    1.20    9.00 
  12   2  -8    4.50   12.10 
 -12   2   8   12.80    9.40 
 -11  -2   8    5.20    7.20 
  11  -2  -8    1.10    9.90 
 -11  -2   8   13.40    9.80 
  11  -2  -8  -13.10   13.60 
 -11  -2   8    0.40    9.20 
  11  -2  -8    4.80    8.90 
  11   2  -8    7.40    8.70 
 -11   2   8    2.60    8.70 
  11   2  -8    5.50    8.80 
  10  -2  -8   -5.50   13.30 
  10  -2  -8   -3.90   10.30 
 -10  -2   8    7.60    8.80 
 -10  -2   8    7.10    7.30 
 -10  -2   8   -2.60    8.00 
  10  -2  -8   -7.20    7.00 
  10   2  -8   -8.50    6.60 
 -10   2   8   -5.40   10.50 
  10   2  -8   -0.50    6.90 
 -10   2   8    8.10    7.70 
  10   2  -8    3.80   11.40 
 -10   2   8    8.90    7.60 
   9  -2  -8   10.00    9.40 
  -9  -2   8   -1.40    3.40 
   9  -2  -8    8.90    6.70 
  -9  -2   8   14.40    7.80 
  -9  -2   8    0.80    6.80 
  -9  -2   8    3.40    7.90 
   9  -2  -8   24.00   11.80 
  -9   2   8    7.20   10.70 
  -9   2   8    5.50    6.40 
   9   2  -8   14.30   11.20 
   9   2  -8    5.80    6.20 
   9   2  -8   12.50    7.40 
  -9   2   8    2.30    7.70 
   8  -2  -8   31.80   12.00 
   8  -2  -8   -7.30    8.10 
  -8  -2   8   -0.60    7.00 
   8  -2  -8    1.60    4.80 
  -8  -2   8   10.40    7.00 
  -8  -2   8   24.00    7.50 
   8   2  -8    3.80    5.10 
  -8   2   8   -0.40    5.80 
   8   2  -8   20.90   11.00 
  -8   2   8   -0.10    6.90 
  -8   2   8    4.70    8.40 
   8   2  -8    0.80    6.20 
  -7  -2   8    8.60    7.00 
   7  -2  -8   16.60   10.40 
  -7  -2   8   21.80    7.30 
   7  -2  -8   10.50    5.50 
  -7  -2   8    9.20    6.40 
   7  -2  -8   17.40    9.00 
  -7   2   8    6.00    7.90 
   7   2  -8   14.30    6.80 
   7   2  -8    9.70    6.70 
  -7   2   8   13.40    6.20 
   7   2  -8   15.00   10.10 
  -7   2   8    1.40    6.20 
   6  -2  -8   23.40   10.90 
   6  -2  -8    6.70    5.90 
  -6  -2   8   12.20    7.50 
  -6  -2   8   42.20    8.90 
   6  -2  -8   32.60    9.90 
   6   2  -8   16.20    7.10 
   6   2  -8   40.40   12.40 
  -6   2   8   21.70    8.80 
  -6   2   8   36.50    7.80 
  -6   2   8   10.30    7.70 
   6   2  -8   24.70    7.80 
  -5  -2   8    1.90    6.10 
   5  -2  -8    7.70    8.10 
   5  -2  -8    4.50    8.50 
  -5  -2   8    4.00    5.30 
   5  -2  -8    2.60    4.00 
  -5  -2   8    0.20    4.90 
  -5   2   8    3.40    7.40 
   5   2  -8    2.90    4.40 
  -5   2   8   -3.90    4.70 
   5   2  -8   -7.40    8.90 
   5   2  -8   -3.00    4.40 
  -5   2   8    9.50    5.50 
  -4  -2   8    8.50    5.50 
  -4  -2   8    8.00    5.50 
   4  -2  -8    6.30    4.20 
   4  -2  -8   26.10    9.20 
   4  -2  -8   28.50    9.90 
   4   2  -8    8.90    5.10 
  -4   2   8   20.60    8.40 
  -4   2   8    4.80    5.20 
   4   2  -8   30.90   10.20 
  -4   2   8   11.80    5.20 
   4   2  -8    6.10    5.30 
  -3  -2   8   22.20    7.00 
   3  -2  -8   23.40    8.50 
  -3  -2   8    8.90    6.40 
   3  -2  -8   26.20    9.70 
   3  -2  -8    9.60    4.90 
  -3  -2   8   17.40    5.90 
  -3   2   8   13.90    5.30 
  -3   2   8   13.80    6.40 
   3   2  -8    5.40    5.70 
   3   2  -8   11.00    5.30 
   3   2  -8   17.70    9.70 
  -3   2   8   14.50    8.20 
   2  -2  -8   82.79   18.70 
  -2  -2   8   76.09   15.80 
  -2  -2   8   89.19   17.80 
   2  -2  -8   75.39   16.40 
   2  -2  -8   53.99   15.30 
   2   2  -8   61.59   15.80 
  -2   2   8   70.99   17.10 
   2   2  -8  100.79   19.30 
   2   2  -8   59.59   15.40 
  -2   2   8   65.09   15.70 
  -2   2   8   63.89   16.20 
   1  -2  -8   69.49   15.70 
   1  -2  -8   86.89   18.00 
  -1  -2   8   55.69   16.80 
  -1   2   8   60.59   16.70 
  -1   2   8   77.59   16.00 
   1   2  -8   67.99   15.70 
   1   2  -8   73.59   16.00 
  -1   2   8   67.89   16.30 
   0  -2  -8  223.48   51.59 
   0  -2   8  255.17   51.69 
   0  -2   8  225.08   52.29 
   0  -2  -8  272.37   52.49 
   0   2   8  221.78   52.29 
   0   2  -8  244.08   51.79 
   0   2  -8  270.07   52.79 
   0   2   8  229.78   51.59 
   0   2   8  241.98   51.89 
   0   2  -8  233.48   51.59 
   1  -2   8   14.70    8.00 
   1  -2   8   26.90    6.80 
  -1  -2  -8   25.60    8.60 
   1   2   8   23.50    7.90 
  -1   2  -8   20.60    6.30 
  -1   2  -8   14.40    6.40 
   1   2   8   24.00    6.60 
   1   2   8    8.00    7.50 
  -1   2  -8   30.40    9.00 
   2  -2   8  164.28   30.20 
  -2  -2  -8  121.49   29.60 
  -2  -2  -8  160.68   30.70 
   2  -2   8  121.09   30.70 
   2   2   8  151.78   29.90 
   2   2   8  134.09   29.80 
   2   2   8  105.39   30.50 
  -2   2  -8  133.69   29.60 
  -2   2  -8  136.99   29.70 
  -3  -2  -8    2.20    7.50 
  -3  -2  -8    3.10    3.20 
   3  -2   8    5.20    5.50 
   3  -2   8   12.00    7.30 
   3   2   8    6.20    7.00 
  -3   2  -8   -8.10    6.60 
   3   2   8    6.30    4.80 
  -3   2  -8   -0.10    3.00 
  -3   2  -8    6.70    3.60 
  -4  -2  -8    6.00    4.30 
   4  -2   8   17.00    7.10 
  -4  -2  -8   25.10    8.70 
   4  -2   8    3.60    7.20 
  -4   2  -8   30.70    9.40 
   4   2   8   11.90    7.30 
  -4   2  -8    8.70    4.30 
   4   2   8   10.20    5.80 
  -4   2  -8    7.00    3.90 
   4   2   8   11.20    6.20 
  -5  -2  -8    7.30    8.40 
  -5  -2  -8    3.30    4.00 
   5  -2   8    6.60    6.00 
   5  -2   8    1.20    6.60 
  -5   2  -8    8.20    7.90 
   5   2   8   -6.80    4.80 
  -5   2  -8    0.90    3.30 
   5   2   8   -4.40    7.20 
   5   2   8    2.10    4.30 
  -5   2  -8   -0.10    3.80 
  -6  -2  -8   -1.60    4.10 
  -6  -2  -8   14.00    9.30 
   6  -2   8    1.10    6.20 
   6  -2   8    0.40    6.40 
   6   2   8    1.40    4.20 
  -6   2  -8   -0.20    4.40 
   6   2   8   -6.10    7.60 
  -6   2  -8    3.10    9.00 
   6   2   8   11.20    7.50 
  -6   2  -8    2.70    3.40 
  -7  -2  -8    5.50   10.10 
   7  -2   8   -1.40    6.90 
  -7  -2  -8    3.30    4.70 
   7  -2   8   20.40    8.20 
  -7   2  -8    5.90    9.50 
   7   2   8    2.00    4.90 
  -7   2  -8    6.80    4.20 
   7   2   8   28.10    8.30 
   7   2   8    2.20    9.00 
  -7   2  -8    5.40    4.70 
  -8  -2  -8   13.80    9.00 
  -8  -2  -8    2.20    5.10 
   8  -2   8  -14.90    9.50 
   8  -2   8   11.80   11.30 
  -8   2  -8   10.80   10.30 
   8   2   8    3.50    4.60 
   8   2   8    7.00    9.90 
   8   2   8   12.10    9.60 
  -8   2  -8   -2.20    4.80 
  -9  -2  -8   30.80   11.50 
   9  -2   8   18.50   11.50 
  -9  -2  -8    2.10    5.90 
   9  -2   8   43.40   13.00 
   9   2   8   11.00    5.50 
   9   2   8    7.20   10.30 
  -9   2  -8    8.80    6.70 
 -10  -2  -8    1.50    6.10 
 -10  -2  -8    4.50   11.30 
  10  -2   8    4.00   10.20 
  10  -2   8   12.80   10.90 
  10   2   8    0.00   10.90 
 -10   2  -8    9.50    7.20 
  10   2   8   -1.90    4.70 
 -11  -2  -8    8.10    8.00 
  11  -2   8   -0.50   12.40 
 -11   2  -8   21.90    9.00 
  11   2   8    8.80   12.50 
 -12  -2  -8    4.20    7.80 
  12  -2   8   10.80   12.20 
  12  -2   8   -8.60   15.00 
 -12  -2  -8  -11.70   14.50 
 -12  -2  -8   -1.90   12.90 
 -12   2  -8   -3.70   15.60 
 -12   2  -8  -10.40    7.70 
  12   2   8   27.60   14.90 
  12   2   8   14.80   17.40 
 -13  -2  -8   -1.50   15.10 
  13  -2   8    3.80   14.80 
  13  -2   8    3.60   18.40 
 -13  -2  -8    7.50    9.50 
 -13   2  -8    4.20    9.50 
  13   2   8    3.80   17.70 
  13   2   8    6.10   16.80 
 -13   2  -8   28.80   17.80 
 -14  -2  -8    6.70   10.70 
  14  -2   8  -30.50   18.30 
 -14  -2  -8  -13.30   19.40 
  14  -2   8  -13.30   21.10 
  14  -2   8   67.09   29.00 
 -14  -2  -8  -25.10   16.30 
  14   2   8  -11.50   20.70 
 -14   2  -8   -0.10   10.90 
  15  -3  -8   -0.40   30.20 
 -15  -3   8   20.80   19.50 
  15  -3  -8    7.00   18.60 
 -15   3   8   23.70   18.00 
  15   3  -8   18.10   24.40 
  14  -3  -8  -20.20   16.30 
 -14  -3   8  -31.80   18.10 
  14  -3  -8  -47.10   27.20 
  14  -3  -8   -9.10   15.90 
 -14  -3   8   -9.70   16.10 
 -14  -3   8   14.60   13.90 
  14   3  -8   -7.00   20.80 
 -14   3   8   25.60   15.40 
 -14   3   8    8.20   15.50 
  13  -3  -8  -14.00   13.70 
  13  -3  -8   17.30   15.50 
 -13  -3   8   26.40   14.80 
 -13  -3   8   -2.70   12.70 
 -13   3   8   11.10   12.80 
  13   3  -8  -24.60   14.90 
 -13   3   8   -3.20   11.90 
 -12  -3   8   20.90   10.70 
  12  -3  -8    1.40   12.30 
  12  -3  -8  -41.00   19.10 
 -12  -3   8    3.30   11.60 
  12  -3  -8    3.50   13.50 
  12   3  -8  -47.00   19.10 
 -12   3   8    9.50   10.70 
  12   3  -8    7.60   15.60 
 -12   3   8   -2.90   11.40 
 -11  -3   8   20.80    9.80 
  11  -3  -8   -1.90   10.20 
 -11  -3   8    2.60   10.40 
  11  -3  -8   17.80   18.80 
  11   3  -8  -23.90   18.40 
  11   3  -8   -4.20   12.40 
 -11   3   8    6.50   10.70 
  10  -3  -8   44.80   18.10 
  10  -3  -8   15.30   10.90 
 -10  -3   8   29.60   11.40 
 -10  -3   8   18.70   11.70 
 -10  -3   8   43.60   12.00 
  10  -3  -8   38.40   14.60 
 -10   3   8   20.80   12.20 
  10   3  -8   17.30   12.40 
  10   3  -8    2.10   20.30 
  10   3  -8   19.50   12.60 
 -10   3   8   33.20   11.10 
   9  -3  -8   31.00   14.70 
  -9  -3   8  -17.00    8.50 
   9  -3  -8   10.30   11.50 
  -9  -3   8    6.80    8.60 
   9  -3  -8    3.30    8.30 
  -9  -3   8   -2.40    7.90 
  -9   3   8   -0.90    8.60 
   9   3  -8   15.90    9.20 
   9   3  -8   18.50   14.70 
  -9   3   8   -1.40    7.60 
   9   3  -8   13.00    9.60 
  -8  -3   8   20.00    8.60 
   8  -3  -8    3.90    7.30 
  -8  -3   8   10.80    8.10 
   8  -3  -8   -1.40   11.80 
  -8  -3   8    3.00    7.60 
   8  -3  -8   15.90   10.70 
  -8   3   8   -0.70    7.60 
  -8   3   8   13.80    7.70 
   8   3  -8   10.80    8.90 
   8   3  -8    6.40    8.10 
   8   3  -8    8.10   13.00 
  -8   3   8   -2.30   11.60 
  -7  -3   8    9.90    6.70 
  -7  -3   8   27.90    8.90 
   7  -3  -8   20.00    7.30 
   7  -3  -8   12.20   12.50 
  -7  -3   8    4.60    7.30 
   7  -3  -8   22.60   11.20 
   7  -3  -8   13.20    7.50 
  -7   3   8    4.60    7.40 
  -7   3   8    9.60    8.50 
  -7   3   8   16.80   14.70 
   7   3  -8   11.20   12.00 
   7   3  -8    6.50    7.40 
  -6  -3   8   11.00    7.50 
   6  -3  -8   24.10   11.40 
  -6  -3   8   20.70    8.10 
  -6  -3   8   31.40    7.30 
   6  -3  -8   19.60   10.50 
   6  -3  -8   10.60    6.30 
  -6   3   8   -1.80   10.30 
  -6   3   8   17.10    7.00 
   6   3  -8    5.50    7.40 
   6   3  -8   37.10   13.00 
  -6   3   8   -0.90    6.50 
   6   3  -8   13.70    7.40 
   5  -3  -8   -0.50    9.40 
  -5  -3   8   12.20    5.20 
   5  -3  -8   -1.20    4.20 
  -5  -3   8    1.00    6.20 
  -5   3   8    5.10    9.20 
  -5   3   8   -1.20    5.60 
   5   3  -8   -7.50    9.90 
   5   3  -8   -5.60    5.10 
   5   3  -8    2.20    5.20 
  -5   3   8    7.40    4.80 
  -4  -3   8    5.90    5.00 
  -4  -3   8   -3.90    6.10 
   4  -3  -8   11.70    9.40 
  -4  -3   8   -1.00    5.70 
   4  -3  -8   22.00    9.60 
   4  -3  -8   -3.30    3.30 
   4   3  -8    0.10    6.50 
  -4   3   8   -0.20    7.80 
  -4   3   8    8.90    4.50 
  -4   3   8    6.80    5.10 
   4   3  -8    3.50    4.70 
   4   3  -8    2.10    9.90 
   3  -3  -8   33.00   10.00 
  -3  -3   8   43.90   10.60 
  -3  -3   8   58.49   11.90 
   3  -3  -8   63.49   12.60 
  -3  -3   8   27.80   11.30 
  -3   3   8   33.70    9.80 
   3   3  -8   35.10   10.20 
   3   3  -8   44.20   11.70 
   3   3  -8   70.99   14.80 
  -3   3   8   29.90   11.30 
  -3   3   8   41.30   13.80 
  -2  -3   8   69.59   14.80 
   2  -3  -8   49.60   14.20 
  -2  -3   8   63.59   15.50 
   2  -3  -8   77.79   16.30 
  -2  -3   8   55.59   16.10 
   2   3  -8   57.89   15.70 
   2   3  -8   91.99   18.30 
  -2   3   8   79.19   18.30 
   2   3  -8   55.69   14.50 
  -1  -3   8  162.98   31.10 
   1  -3  -8  163.48   31.20 
  -1  -3   8  159.98   30.50 
  -1  -3   8  102.89   31.20 
   1  -3  -8  129.79   30.30 
  -1   3   8  117.69   31.30 
   1   3  -8  143.29   30.50 
   1   3  -8  165.48   32.10 
   1   3  -8  120.49   31.20 
  -1   3   8  135.69   30.30 
   0  -3   8   49.50   10.10 
   0  -3  -8   49.10   11.20 
   0  -3   8   31.70   11.40 
   0   3  -8   46.10   12.80 
   0   3  -8   35.40   10.90 
   0   3  -8   32.60    9.60 
   0   3   8   35.90    9.80 
   0   3   8   39.70   13.00 
  -1  -3  -8   46.80   12.20 
  -1  -3  -8   74.39   13.80 
   1  -3   8   68.19   15.70 
   1  -3   8   65.49   12.90 
  -1   3  -8   45.00   12.30 
   1   3   8   49.99   12.50 
  -1   3  -8   79.39   15.20 
  -1   3  -8   44.70   12.80 
   1   3   8   31.40   13.40 
   1   3   8   86.99   23.40 
   2  -3   8   27.50    7.40 
  -2  -3  -8   38.10    8.90 
  -2  -3  -8   12.90    6.20 
   2  -3   8   18.40    9.10 
   2   3   8   36.20    7.30 
  -2   3  -8   18.70    8.20 
  -2   3  -8   18.70    6.40 
   2   3   8   19.40    9.70 
   2   3   8   13.60    8.60 
   3  -3   8    7.60    9.80 
  -3  -3  -8   45.90   10.20 
  -3   3  -8   24.00    8.30 
   3   3   8   27.90   10.00 
  -3   3  -8   60.49   12.10 
   3   3   8   27.90    8.60 
   3   3   8   14.80    9.20 
   4  -3   8    9.10    8.10 
  -4  -3  -8    4.70    4.30 
   4  -3   8   -2.20    6.30 
  -4  -3  -8   14.70    8.30 
   4   3   8   10.60    6.00 
   4   3   8   10.20    8.60 
   4   3   8    9.00    7.10 
  -4   3  -8    1.70    8.70 
  -4   3  -8   -2.40    4.40 
  -4   3  -8    0.40    4.10 
  -5  -3  -8   10.30    5.20 
  -5  -3  -8   15.90    8.80 
   5  -3   8    7.60    8.40 
   5  -3   8   12.00    7.50 
   5   3   8   26.50    8.70 
  -5   3  -8   15.30   18.10 
   5   3   8   14.20    8.30 
  -5   3  -8   10.50    5.60 
   5   3   8    5.80    8.90 
  -5   3  -8    5.50    5.60 
   6  -3   8   -2.90    8.60 
   6  -3   8    3.50    8.20 
  -6  -3  -8    1.70    4.60 
  -6  -3  -8  -10.60    8.40 
   6   3   8   14.60    8.30 
  -6   3  -8   -1.60    5.10 
   6   3   8   26.80   10.60 
   6   3   8    2.40    7.30 
  -6   3  -8    9.80    5.60 
  -6   3  -8   14.30    9.60 
  -7  -3  -8    8.70    6.80 
  -7  -3  -8   23.50   11.10 
   7  -3   8   24.70   11.30 
   7  -3   8   24.30   12.40 
   7   3   8    4.10   11.30 
  -7   3  -8   20.50   11.30 
   7   3   8   21.70    8.60 
  -7   3  -8   16.80    7.70 
  -7   3  -8    6.40    6.60 
   7   3   8   17.80   10.60 
  -8  -3  -8    9.70    7.00 
   8  -3   8   -8.50   10.70 
  -8  -3  -8   34.90   12.30 
   8  -3   8   36.50   11.70 
  -8   3  -8   24.30   12.70 
   8   3   8   18.80   12.70 
   8   3   8   13.20    8.50 
   8   3   8   27.40   10.70 
  -8   3  -8   13.30    7.20 
   9  -3   8   18.90   13.30 
  -9  -3  -8   15.70    7.70 
   9  -3   8   11.60   13.20 
   9   3   8    5.50   13.20 
  -9   3  -8   14.50    8.20 
   9   3   8    8.50    7.80 
  10  -3   8    2.60   14.20 
 -10  -3  -8  -10.20   11.90 
  10  -3   8  -17.70   13.30 
 -10  -3  -8    9.00    8.50 
 -10  -3  -8   -7.70   17.50 
 -10   3  -8   -3.20    7.20 
  10   3   8    4.80   14.10 
 -10   3  -8  -10.40   13.90 
  10   3   8    0.90   14.50 
 -11  -3  -8   17.00   16.50 
 -11  -3  -8   17.00    8.40 
  11  -3   8    0.80   13.90 
  11  -3   8  -34.60   24.30 
  11  -3   8  -15.60   16.00 
 -11  -3  -8  -26.50   13.30 
  11   3   8   30.20   16.80 
 -11   3  -8   -7.00    8.20 
  11   3   8    4.00   15.60 
 -11   3  -8   13.80   15.90 
  12  -3   8  -16.30   17.80 
  12  -3   8  -90.39   37.90 
 -12  -3  -8   16.90   18.90 
  12  -3   8   12.60   28.20 
 -12  -3  -8   18.50    9.50 
 -12   3  -8    5.50   10.30 
  12   3   8   37.40   18.50 
  12   3   8  -18.80   18.30 
 -12   3  -8  -14.50   18.50 
  13  -3   8   68.29   33.40 
  13  -3   8  -16.40   20.60 
  13  -3   8   46.30   23.50 
 -13  -3  -8   27.90   12.40 
 -13  -3  -8   38.80   22.60 
 -13  -3  -8   14.20   18.30 
  13   3   8    9.10   21.60 
 -13   3  -8    5.30   12.30 
  13  -4  -8   21.60   20.00 
 -13  -4   8   10.20   15.90 
 -13  -4   8    6.20   16.10 
  13   4  -8   22.60   22.10 
  12  -4  -8   21.80   25.40 
  12  -4  -8   58.79   22.70 
 -12  -4   8   10.00   14.90 
 -12  -4   8    6.30   13.00 
  12  -4  -8  -19.20   15.80 
 -12  -4   8   10.00   14.50 
  12   4  -8  -20.00   19.10 
  12   4  -8  -49.70   28.00 
 -12   4   8    5.10   13.20 
 -12   4   8   27.50   14.40 
 -11  -4   8   -4.00   11.70 
 -11  -4   8    4.20   13.60 
  11  -4  -8   24.20   19.60 
 -11  -4   8   22.00   13.30 
  11  -4  -8    7.60   14.10 
  11  -4  -8   26.20   23.40 
 -11   4   8   -2.30   12.00 
 -11   4   8   -3.20   12.90 
  11   4  -8   23.60   17.40 
 -10  -4   8   -0.20   11.10 
 -10  -4   8    9.20   10.20 
  10  -4  -8    5.00   12.20 
  10  -4  -8   42.40   18.10 
 -10  -4   8    4.90   11.60 
  10  -4  -8  -19.30   19.90 
 -10   4   8    6.50   11.00 
  10   4  -8   -8.30   14.20 
  10   4  -8  -19.20   21.50 
 -10   4   8   -9.60    9.90 
   9  -4  -8   21.40   16.10 
  -9  -4   8   14.40   10.50 
  -9  -4   8    1.80    9.20 
   9  -4  -8  -16.20   17.80 
  -9  -4   8   19.00   10.80 
   9  -4  -8   -1.30   10.70 
  -9  -4   8   18.40    8.80 
   9   4  -8    2.60   12.50 
  -9   4   8    5.50   10.30 
  -9   4   8    2.70    9.50 
  -8  -4   8   74.39   15.30 
  -8  -4   8   58.79   15.10 
  -8  -4   8   41.70   15.90 
   8  -4  -8   91.99   21.50 
   8  -4  -8   31.70   16.00 
   8   4  -8   44.60   16.70 
   8   4  -8   77.79   22.20 
  -8   4   8   27.00   15.10 
  -8   4   8   66.89   14.90 
  -7  -4   8   15.10   11.40 
   7  -4  -8   25.20   14.50 
  -7  -4   8   17.10    7.70 
   7  -4  -8   -9.50    8.40 
  -7  -4   8    6.50    9.50 
   7   4  -8   32.60   16.70 
   7   4  -8    9.90    9.20 
  -7   4   8    2.40    6.90 
  -7   4   8   12.90    8.20 
   7   4  -8    5.70    9.70 
  -6  -4   8    5.40    8.60 
  -6  -4   8   11.20    8.00 
   6  -4  -8   20.90    9.60 
   6  -4  -8   16.30    8.30 
  -6  -4   8   41.50   13.10 
   6   4  -8    1.20    7.90 
   6   4  -8   33.90   15.20 
   6   4  -8    6.10    9.70 
   5  -4  -8   51.19   14.30 
   5  -4  -8   70.59   18.20 
  -5  -4   8   37.80   12.80 
  -5  -4   8   47.90   12.00 
   5   4  -8   32.70   13.70 
   5   4  -8   90.79   18.80 
  -5   4   8   39.30   18.30 
  -5   4   8   36.40   11.40 
   5   4  -8   50.79   12.30 
  -5   4   8   31.80   12.50 
   4  -4  -8   41.00   14.10 
  -4  -4   8   29.10   10.90 
   4  -4  -8   30.80   11.60 
  -4  -4   8   15.70    9.40 
   4   4  -8   22.10   11.40 
  -4   4   8   31.80   16.50 
   4   4  -8   54.59   14.90 
   3  -4  -8   -1.40    9.10 
   3  -4  -8   -0.40   11.40 
  -3  -4   8   12.90    7.40 
   3   4  -8    0.80    9.00 
   3   4  -8   -7.80   10.50 
  -3   4   8    5.80   11.70 
   2  -4  -8   19.20   10.80 
   2  -4  -8   11.40   15.30 
  -2  -4   8    3.20    8.00 
   2   4  -8    1.70    7.90 
  -2   4   8   -5.70   11.50 
   2   4  -8   23.10    9.90 
  -1  -4   8    8.90    7.80 
   1  -4  -8   12.30   11.20 
   1  -4  -8   21.80   10.40 
   1   4  -8   11.40    7.90 
   1   4  -8   17.10    6.50 
   1   4  -8   -3.80    8.50 
   0  -4  -8   16.80   11.40 
   0  -4  -8    4.80    9.50 
   0  -4   8   14.50    8.50 
   0   4   8    7.10   11.00 
   0   4  -8   12.90    6.10 
  -1  -4  -8   -0.90   11.00 
  -1  -4  -8   -5.60    9.10 
  -1   4  -8   -0.90    7.20 
   1   4   8    2.10   10.00 
  -1   4  -8    9.50    8.00 
  -2  -4  -8    1.10   11.40 
  -2   4  -8    3.10    7.70 
   2   4   8    8.70   10.40 
  -2   4  -8  -14.70    8.40 
  -3  -4  -8  -21.30   12.00 
   3  -4   8    4.50    8.80 
  -3   4  -8    2.00    9.90 
  -3   4  -8   -2.60    7.70 
  -3   4  -8   -0.30    4.20 
   3   4   8   -8.40    7.00 
   3   4   8    5.60   10.50 
   4  -4   8   -4.10    7.60 
  -4  -4  -8   -6.40    4.70 
  -4  -4  -8  -12.40   18.30 
   4  -4   8   -5.20    9.40 
   4   4   8   -9.50   10.60 
   4   4   8  -15.30    9.50 
  -4   4  -8   12.40    8.80 
  -4   4  -8    2.30    5.00 
  -4   4  -8   -2.20   10.80 
   5  -4   8    4.60    8.70 
  -5  -4  -8   17.90    8.20 
   5   4   8   19.70   10.60 
  -5   4  -8    9.40    6.10 
   5   4   8    3.60   10.80 
  -5   4  -8   -6.60   11.10 
   5   4   8   -4.90   10.40 
  -5   4  -8   17.10    9.40 
  -6  -4  -8   13.20    9.70 
  -6  -4  -8   18.70    7.30 
   6  -4   8    4.90   12.50 
   6  -4   8   33.40   11.40 
  -6   4  -8   29.90   11.00 
  -6   4  -8   15.20    7.70 
   6   4   8   29.40   13.70 
   6   4   8   22.60   11.80 
   6   4   8    9.30   11.60 
  -6   4  -8   24.20   12.90 
   7  -4   8    1.10   11.50 
  -7  -4  -8   13.00   10.50 
  -7  -4  -8    0.00    6.00 
   7  -4   8   -6.50   12.20 
  -7  -4  -8   41.40   20.30 
  -7   4  -8    2.90    6.90 
   7   4   8   42.10   14.90 
  -7   4  -8    3.60   10.50 
   7   4   8  -13.00   14.30 
   8  -4   8   10.70   13.70 
   8  -4   8   15.20   14.90 
  -8  -4  -8    8.10    7.10 
   8  -4   8   20.10   24.80 
  -8  -4  -8   -2.40   16.30 
  -8  -4  -8   12.60   11.50 
   8   4   8    2.40   15.20 
   8   4   8   -7.60   15.90 
  -8   4  -8  -23.40   13.60 
  -8   4  -8   -2.90    7.60 
   9  -4   8   17.60   16.80 
  -9  -4  -8   20.70   13.50 
  -9  -4  -8   37.90   18.40 
   9  -4   8   22.50   26.20 
  -9  -4  -8    5.60    8.80 
   9  -4   8   -0.60   14.50 
   9   4   8   30.30   17.70 
  -9   4  -8    4.30   10.20 
   9   4   8   26.30   17.80 
  -9   4  -8   47.30   17.30 
 -10  -4  -8   -6.30   10.00 
  10  -4   8   31.00   17.50 
  10  -4   8   18.30   19.60 
 -10  -4  -8   35.20   20.40 
 -10  -4  -8    4.90   13.80 
  10   4   8  -12.00   19.80 
  10   4   8  -17.60   20.20 
 -10   4  -8   -6.00   16.50 
 -10   4  -8   -0.80   10.50 
 -11  -4  -8    8.40   11.70 
  11  -4   8  -14.30   21.70 
  11  -4   8   34.40   22.20 
 -11  -4  -8   33.70   17.50 
  11   4   8  -23.50   22.80 
 -11   4  -8   15.50   12.30 
  -9  -5   8   -1.10   20.20 
  -9  -5   8    8.00   11.30 
  -9  -5   8   12.30   13.30 
   9   5  -8   48.90   27.40 
  -9   5   8    7.10   10.40 
   8   5  -8    0.90   14.40 
   8   5  -8    1.10   24.90 
  -7  -5   8   -5.20   11.10 
   7  -5  -8   11.30   14.90 
   7  -5  -8    4.30   21.40 
   6  -5  -8   17.80   14.20 
  -6  -5   8   11.30   11.50 
   6  -5  -8    8.80   19.10 
   6   5  -8   17.30   19.30 
   5  -5  -8   31.50   19.60 
  -5  -5   8   23.70   12.60 
  -5  -5   8   53.19   18.90 
   5  -5  -8    7.20   15.00 
  -4  -5   8   11.70   11.70 
   4  -5  -8   22.50   14.30 
   4  -5  -8   39.50   17.70 
  -4  -5   8   37.30   18.50 
  -3  -5   8  -10.50   18.00 
  -3  -5   8    0.00   10.50 
   3  -5  -8   36.80   15.20 
   3  -5  -8    3.40   13.10 
   3   5  -8   23.50   12.90 
  -2  -5   8    6.30   10.50 
  -2  -5   8   14.80   19.50 
   2  -5  -8   20.40   14.40 
   2  -5  -8    8.70   13.60 
   1  -5  -8   10.90   13.90 
   1  -5  -8   14.90   13.10 
  -1  -5   8   -2.40   10.10 
  -1  -5   8   30.30   19.80 
   1   5  -8    8.90   11.80 
   0  -5  -8  -18.90   15.00 
   0  -5   8   25.70   19.70 
   0  -5   8   23.00   10.90 
   0   5  -8   12.40   12.60 
   1  -5   8    7.60   20.00 
  -1  -5  -8   -1.50   16.70 
  -1   5  -8    9.30   13.00 
  -2  -5  -8   13.40   17.30 
   2  -5   8   44.20   22.20 
  -2   5  -8    7.60   13.10 
   3  -5   8  -16.20   22.60 
  -3  -5  -8   17.20   16.40 
  -3   5  -8   12.10   13.90 
   4  -5   8  -26.90   23.60 
  -4  -5  -8   -0.40   19.00 
  -4   5  -8   -5.70   12.80 
  -5  -5  -8   -6.40   19.90 
   5  -5   8   49.20   28.90 
  -5   5  -8   12.90   13.80 
  -6  -5  -8   11.30   20.40 
   6  -5   8   15.00   30.70 
   6   5   8   28.70   29.30 
   7   5   8   14.50   17.60 
   8  -5   8   -5.90   19.40 
   8   5   8  -13.90   20.70 
  -8   5  -8   24.00   16.10 
   1  -6  -8  -12.50   19.80 
   1  -6  -8   22.00   23.20 
   0  -6   8  141.49   45.00 
  17   0  -9   34.40   22.40 
  17   0  -9   33.90   36.30 
 -17   0   9    9.70   16.00 
 -16   0   9    1.20   14.60 
  16   0  -9   37.20   27.70 
 -16   0   9   -9.20   15.70 
  16   0  -9  -11.70   15.20 
 -15   0   9   18.10   12.60 
  15   0  -9   25.40   18.90 
  15   0  -9    0.10   14.60 
 -15   0   9    5.10   11.80 
  14   0  -9  -18.20   13.30 
 -14   0   9   -5.70   11.30 
  14   0  -9  -42.90   17.20 
 -14   0   9    4.30   10.20 
 -13   0   9   -1.30    9.20 
  13   0  -9  -29.70   13.40 
 -13   0   9    3.60    8.20 
  13   0  -9   -4.50   10.70 
 -12   0   9   24.90   10.20 
  12   0  -9   21.50   14.70 
  12   0  -9    4.10    7.80 
 -12   0   9   -1.40    8.40 
 -12   0   9   13.60    9.50 
 -11   0   9    4.80    9.00 
  11   0  -9   -4.00    5.70 
  11   0  -9    2.20   13.50 
  11   0  -9    6.00    8.00 
 -11   0   9    3.00    6.90 
 -11   0   9   -0.40    7.20 
  10   0  -9    2.00    4.50 
  10   0  -9    2.10    5.20 
 -10   0   9    3.00    7.40 
 -10   0   9    7.60    7.20 
 -10   0   9    4.70    6.30 
  10   0  -9   -9.80   12.10 
  -9   0   9    1.60    5.30 
   9   0  -9  -10.20    8.80 
  -9   0   9   -4.10    6.60 
   9   0  -9   -1.00    4.10 
   9   0  -9   -2.70    4.90 
  -9   0   9    5.60    5.40 
   8   0  -9   14.10   10.90 
  -8   0   9    1.90    5.70 
   8   0  -9    1.00    4.70 
  -8   0   9    0.30    5.20 
   8   0  -9   -5.40    3.50 
  -8   0   9   10.00    5.20 
   7   0  -9    2.70    4.20 
  -7   0   9    3.10    5.40 
   7   0  -9   -8.50   10.00 
  -7   0   9    1.60    4.70 
   7   0  -9   -0.90    4.00 
  -7   0   9   -1.90    5.00 
  -6   0   9    5.80    5.70 
   6   0  -9    2.10    3.40 
  -6   0   9   -1.60    5.50 
  -6   0   9    2.40    4.80 
   6   0  -9    2.20    3.70 
   6   0  -9   20.20   11.20 
  -5   0   9    1.20    5.50 
   5   0  -9    1.30    9.80 
   5   0  -9    1.60    4.60 
  -5   0   9    6.80    4.50 
  -5   0   9   -2.50    5.30 
  -4   0   9   -5.10    4.80 
  -4   0   9    3.70    6.00 
   4   0  -9   13.90   10.30 
   4   0  -9    1.20    4.40 
  -3   0   9    0.60    4.70 
  -3   0   9    3.70    4.10 
   3   0  -9   -3.50    8.70 
   3   0  -9    5.90    4.90 
   2   0  -9   27.90    9.90 
  -2   0   9   13.70    7.90 
  -2   0   9   21.40    7.10 
   2   0  -9   14.50    5.60 
  -1   0   9   13.00    7.80 
   1   0  -9   10.10    5.30 
   1   0  -9   20.50   11.10 
  -1   0   9   11.20    5.50 
   0   0   9   -2.60    6.60 
   0   0  -9    1.20    3.70 
   0   0   9    6.40    4.90 
   0   0  -9    2.20    7.50 
  -1   0  -9    1.20    8.40 
   1   0   9    2.50    4.40 
   1   0   9    1.50    6.40 
  -2   0  -9   -0.40    3.50 
   2   0   9   -1.40    4.90 
  -2   0  -9    6.90    8.40 
   2   0   9   -0.70    5.50 
   3   0   9    5.20    6.90 
  -3   0  -9   -1.40    7.80 
   3   0   9    1.10    5.30 
  -3   0  -9   -0.80    4.40 
  -4   0  -9    5.80    3.90 
   4   0   9    3.80    5.70 
   4   0   9   -4.40    5.00 
  -4   0  -9   10.70    9.10 
  -5   0  -9   -2.00    7.70 
   5   0   9   -1.90    6.30 
   5   0   9   -3.20    5.60 
  -5   0  -9    1.70    3.40 
   6   0   9   -1.60    5.90 
  -6   0  -9   -0.80    7.10 
   6   0   9   -5.70    5.70 
  -6   0  -9   -3.10    3.90 
  -7   0  -9    7.70    5.00 
  -7   0  -9    1.60    8.90 
   7   0   9   -5.40    6.40 
   7   0   9   -5.60    6.80 
  -8   0  -9  -21.40    9.00 
   8   0   9    4.30    7.70 
   8   0   9   -8.80    6.70 
  -8   0  -9    1.60    5.20 
  -9   0  -9    7.20    5.20 
  -9   0  -9   -1.70   10.40 
   9   0   9    2.50    7.70 
   9   0   9   -5.70    7.50 
 -10   0  -9    2.20    6.00 
 -10   0  -9   -7.60   12.00 
  10   0   9   -6.00   10.20 
  10   0   9    1.00   10.40 
  11   0   9    4.70   11.30 
 -11   0  -9    0.40    6.90 
 -11   0  -9   16.10   13.10 
  11   0   9   12.10   11.20 
  12   0   9    0.70   12.70 
  12   0   9   -1.30   12.80 
 -12   0  -9    8.60    7.50 
 -12   0  -9   -9.30   13.10 
  13   0   9    1.70   15.60 
 -13   0  -9    0.00    9.00 
  13   0   9    7.30   16.30 
 -13   0  -9  -22.20   15.10 
 -14   0  -9   -1.10    8.40 
  14   0   9   27.20   21.00 
  14   0   9   -1.40   22.50 
  14   0   9  -11.90   14.80 
  15   0   9    8.80   18.70 
 -15   0  -9   12.40   10.90 
 -15   0  -9   22.20   32.80 
  15   0   9    5.30   27.30 
  16  -1  -9   21.60   27.60 
 -16  -1   9   -0.50   14.80 
  16  -1  -9    3.20   21.00 
 -16  -1   9   -6.10   14.80 
 -16   1   9   29.70   18.70 
  16   1  -9  -41.00   25.90 
 -16   1   9   19.50   18.50 
  16   1  -9   11.30   20.40 
 -15  -1   9   10.20   14.50 
 -15  -1   9    6.80   11.70 
  15  -1  -9    8.20   14.50 
  15  -1  -9   19.00   20.80 
 -15   1   9  -11.00   11.50 
 -15   1   9    3.50   12.90 
  15   1  -9   -5.90   21.20 
  15   1  -9   15.20   14.40 
  14  -1  -9    3.50   13.50 
 -14  -1   9   -7.50   10.30 
 -14  -1   9    7.30   12.50 
  14  -1  -9   17.70   18.20 
  14   1  -9   16.30   18.10 
  14   1  -9    8.10   12.10 
 -14   1   9    9.20   12.20 
 -14   1   9   -6.90   10.30 
 -13  -1   9   16.60   12.10 
  13  -1  -9    8.50   11.90 
  13  -1  -9    4.80   15.60 
 -13  -1   9    2.10    9.30 
 -13   1   9   18.30   10.10 
  13   1  -9   14.10   17.30 
  13   1  -9    9.50   10.40 
 -13   1   9   -6.30    9.30 
  12  -1  -9    3.30   10.20 
 -12  -1   9   18.10    8.80 
 -12  -1   9   16.30    8.70 
  12   1  -9   14.00    8.50 
  12   1  -9   12.90   14.70 
 -12   1   9   -9.50   10.00 
 -12   1   9   30.80   10.20 
 -12   1   9   -1.00   10.40 
 -11  -1   9    7.00    7.50 
  11  -1  -9   -0.50    8.30 
  11  -1  -9   30.70   13.50 
  11  -1  -9   24.00    8.60 
 -11  -1   9   -0.90    6.70 
 -11  -1   9    8.70    6.10 
  11   1  -9    6.70    7.10 
 -11   1   9   21.00    8.10 
  11   1  -9   25.60   12.80 
  11   1  -9    5.10    7.40 
 -11   1   9    0.70    8.80 
 -11   1   9   -6.60    9.20 
  10  -1  -9    3.30   12.50 
 -10  -1   9   -0.70    7.50 
  10  -1  -9    8.40    7.70 
 -10  -1   9    6.10    8.40 
  10  -1  -9   -5.50    5.50 
 -10  -1   9    2.50    5.60 
 -10   1   9   -4.10    6.10 
  10   1  -9   -3.40    6.90 
  10   1  -9   -2.50    5.30 
 -10   1   9    3.30    7.50 
 -10   1   9   -3.20    8.00 
  10   1  -9    0.60   12.10 
  -9  -1   9   14.10    7.20 
  -9  -1   9   12.00    5.70 
   9  -1  -9   16.90    6.70 
  -9  -1   9   10.20    7.70 
   9  -1  -9   13.40    8.00 
   9  -1  -9   35.60   12.30 
   9   1  -9    7.00    6.10 
  -9   1   9    8.40    7.50 
   9   1  -9   14.50    6.30 
  -9   1   9   11.60    6.70 
   9   1  -9   -4.60   11.90 
  -9   1   9   20.20    9.70 
   8  -1  -9    6.90   10.00 
  -8  -1   9    3.20    4.20 
   8  -1  -9   12.30    6.70 
  -8  -1   9    1.90    5.30 
  -8  -1   9   -5.60    5.70 
   8  -1  -9    3.60    4.80 
  -8   1   9   -4.00    6.00 
  -8   1   9    8.90    7.60 
  -8   1   9   -4.70    5.00 
   8   1  -9   21.60   11.00 
   8   1  -9    3.20    4.70 
   8   1  -9    1.20    5.10 
   7  -1  -9   22.90   13.20 
   7  -1  -9   20.30    7.30 
  -7  -1   9   21.90    8.70 
  -7  -1   9   45.90    9.30 
   7   1  -9   21.10    7.60 
   7   1  -9   16.10    7.00 
  -7   1   9   19.50    8.40 
  -7   1   9    6.50    7.50 
   7   1  -9   39.90   13.90 
  -7   1   9   36.30    8.50 
   6  -1  -9    4.00    4.60 
  -6  -1   9   13.80    6.30 
   6  -1  -9   10.00    9.80 
  -6  -1   9    1.80    5.60 
  -6   1   9    2.40    6.20 
   6   1  -9   10.60    5.60 
   6   1  -9    6.70    4.50 
  -6   1   9   12.50    5.90 
  -6   1   9   11.90    7.60 
   6   1  -9    9.60   10.60 
   5  -1  -9   33.60    8.40 
   5  -1  -9   25.10   12.50 
  -5  -1   9   43.50    9.30 
  -5  -1   9   13.40    8.50 
   5   1  -9   34.60   11.70 
  -5   1   9   37.60    9.00 
  -5   1   9   34.90    9.50 
   5   1  -9   21.00    7.80 
  -5   1   9   19.30    8.40 
   5   1  -9   25.00    7.90 
   4  -1  -9   97.59   19.00 
  -4  -1   9   71.19   17.00 
  -4  -1   9   63.79   16.10 
  -4   1   9   44.00   16.50 
   4   1  -9  102.69   20.00 
   4   1  -9   63.59   15.60 
   4   1  -9   63.99   15.60 
  -4   1   9   69.99   16.10 
  -4   1   9   71.99   15.90 
   3  -1  -9   39.50   14.30 
  -3  -1   9   47.60   10.60 
   3  -1  -9   28.10    9.60 
  -3  -1   9   37.60   11.50 
   3   1  -9   54.59   15.10 
  -3   1   9   34.50   11.50 
  -3   1   9   37.10    9.80 
   3   1  -9   44.00   10.10 
   3   1  -9   38.60    9.60 
   2  -1  -9   41.10   13.10 
   2  -1  -9   36.90    9.90 
  -2  -1   9   46.00   12.30 
  -2  -1   9   48.90   10.80 
  -2   1   9   37.60   10.10 
  -2   1   9   29.30   12.00 
  -2   1   9   48.60   11.10 
   2   1  -9   60.29   14.70 
   2   1  -9   37.20   10.10 
  -1  -1   9   83.59   20.40 
   1  -1  -9  113.79   22.00 
  -1  -1   9  100.19   19.30 
   1  -1  -9   66.49   18.60 
   1   1  -9  101.79   22.10 
  -1   1   9   86.19   19.20 
   1   1  -9   86.69   18.80 
  -1   1   9   64.39   20.00 
   0  -1   9  381.66   82.59 
   0  -1  -9  342.27   81.79 
   0  -1   9  402.86   81.99 
   0  -1  -9  409.96   82.79 
   0   1  -9  387.86   81.89 
   0   1  -9  414.76   82.89 
   0   1   9  352.56   82.49 
   0   1   9  380.06   81.89 
   1  -1   9  233.68   53.69 
   1  -1   9  250.67   52.99 
  -1  -1  -9  255.97   53.89 
  -1   1  -9  285.87   54.39 
   1   1   9  221.38   53.69 
   1   1   9  236.18   52.89 
   2  -1   9   72.39   14.60 
  -2  -1  -9   53.19   14.00 
   2  -1   9   55.49   15.30 
   2   1   9   51.09   14.40 
   2   1   9   89.29   17.40 
  -2   1  -9   55.39   13.70 
  -3  -1  -9   36.40   10.90 
   3  -1   9   38.10   12.40 
   3   1   9   62.89   12.00 
  -3   1  -9   48.90   11.00 
   3   1   9   42.70   13.30 
  -4  -1  -9  198.08   40.50 
  -4  -1  -9  157.38   39.20 
   4  -1   9  210.18   39.80 
   4  -1   9  150.08   40.10 
   4   1   9  199.78   39.70 
  -4   1  -9  213.78   40.60 
  -4   1  -9  159.68   39.20 
   5  -1   9   19.10    8.20 
  -5  -1  -9   14.50    6.00 
   5  -1   9   35.00    8.30 
  -5  -1  -9   31.10    9.30 
  -5   1  -9   42.30   10.50 
  -5   1  -9   10.00    5.70 
   5   1   9   19.00   11.10 
   5   1   9   28.70    8.70 
  -6  -1  -9   21.80    9.90 
   6  -1   9   12.40    6.20 
  -6  -1  -9    1.50    4.30 
   6  -1   9    0.10    7.10 
   6   1   9    5.30    7.80 
  -6   1  -9   11.50    8.30 
   6   1   9    4.50    5.70 
  -7  -1  -9   15.10    6.20 
   7  -1   9    6.20    7.80 
  -7  -1  -9   38.10   11.90 
   7  -1   9   27.00   10.40 
  -7   1  -9   13.60    6.30 
   7   1   9   13.20    8.30 
   7   1   9   36.70   10.50 
  -7   1  -9   21.20   10.50 
  -8  -1  -9    6.60    9.30 
   8  -1   9    1.80    9.90 
  -8  -1  -9    0.40    4.20 
   8  -1   9   -3.30    6.80 
  -8   1  -9    6.50    4.50 
  -8   1  -9   14.60   12.90 
   8   1   9    0.50    8.20 
   8   1   9    1.60    6.90 
   9  -1   9    6.80    8.80 
   9  -1   9    6.50   10.00 
  -9  -1  -9    0.30    5.50 
  -9  -1  -9   -1.40    9.70 
   9   1   9   -1.70    8.30 
   9   1   9   -9.50   10.10 
  -9   1  -9  -16.00   12.30 
  -9   1  -9    0.00    5.20 
 -10  -1  -9    4.50    5.50 
  10  -1   9    9.10   10.70 
  10  -1   9    5.60    9.00 
 -10  -1  -9    9.50   10.60 
  10   1   9    6.50    9.30 
  10   1   9    0.00   11.30 
 -10   1  -9   11.50    6.90 
 -10   1  -9   -0.60   13.00 
 -11  -1  -9    1.00    5.70 
  11  -1   9    0.50   10.20 
  11  -1   9    2.80   12.70 
 -11  -1  -9    1.40   12.10 
 -11   1  -9  -12.00   13.70 
 -11   1  -9    4.80    6.30 
  11   1   9   -4.00   11.80 
  11   1   9    1.00   10.50 
 -12  -1  -9    5.60   13.60 
  12  -1   9   13.40   12.80 
 -12  -1  -9    1.80    7.20 
  12  -1   9   -4.50   16.70 
  12   1   9   -9.60   12.50 
  12   1   9    6.90   14.60 
 -12   1  -9   -0.90    7.10 
 -12   1  -9   -3.50   15.70 
 -13  -1  -9   13.50    8.40 
  13  -1   9   -0.20   17.70 
  13  -1   9  -34.00   13.30 
 -13  -1  -9   -1.20   15.60 
 -13   1  -9  -15.90   19.80 
  13   1   9   -9.80   17.20 
 -13   1  -9   -2.50    8.90 
  13   1   9  -11.70   14.20 
  14  -1   9   -9.60   18.90 
 -14  -1  -9   -0.40   10.40 
 -14  -1  -9  -24.40   17.30 
 -14  -1  -9   -4.00   16.00 
  14  -1   9   11.80   17.50 
 -14   1  -9    1.40    9.30 
  14   1   9    9.70   19.40 
 -14   1  -9  -10.50   18.60 
  14   1   9  -26.00   19.80 
 -15  -1  -9   -2.30   20.50 
  15  -1   9  -10.00   23.00 
 -15  -1  -9  -11.20   19.70 
 -15   1  -9   -1.60   12.70 
  15   1   9    6.00   23.50 
  16  -2  -9  -18.70   31.30 
 -16  -2   9   20.90   18.10 
 -16   2   9   11.80   20.30 
  16   2  -9   27.50   21.60 
 -15  -2   9    5.60   13.90 
  15  -2  -9   14.10   17.70 
  15  -2  -9    6.00   26.80 
 -15  -2   9   19.70   15.10 
  15   2  -9   10.70   19.30 
  15   2  -9   45.10   28.30 
 -15   2   9   21.60   15.30 
 -15   2   9   -3.00   15.50 
 -14  -2   9    9.10   13.10 
 -14  -2   9   11.70   14.20 
  14  -2  -9  -20.80   14.50 
  14  -2  -9   29.10   22.80 
  14  -2  -9   -6.40   13.50 
  14   2  -9    9.40   21.40 
 -14   2   9  -18.20   10.90 
 -14   2   9    9.30   12.80 
  14   2  -9  -20.50   14.80 
  13  -2  -9   40.90   13.40 
 -13  -2   9   25.70   12.00 
  13  -2  -9    9.40   12.20 
 -13  -2   9   15.40   13.10 
  13   2  -9   28.70   13.60 
 -13   2   9   17.70   11.80 
 -12  -2   9   18.00   10.00 
  12  -2  -9   11.90   10.80 
  12  -2  -9    2.80   10.10 
 -12  -2   9    0.30   11.00 
  12  -2  -9   44.50   16.90 
 -12  -2   9    0.60   10.00 
 -12   2   9    4.40   10.50 
  12   2  -9   -3.70   11.60 
 -11  -2   9    7.30    9.90 
  11  -2  -9    9.00    9.30 
 -11  -2   9    2.80    8.30 
  11  -2  -9   15.70   11.20 
  11  -2  -9   -2.40   14.60 
 -11  -2   9   14.50    8.50 
 -11   2   9   13.40    9.70 
  11   2  -9    9.10   10.20 
  11   2  -9   18.00    9.90 
 -11   2   9    0.50   14.70 
  10  -2  -9   18.00   10.10 
  10  -2  -9   21.70   13.60 
 -10  -2   9    4.10    7.40 
  10  -2  -9    6.30    7.40 
 -10  -2   9   -2.60    6.90 
 -10   2   9   16.30    7.80 
 -10   2   9    4.10    7.20 
  10   2  -9    2.40   14.40 
  10   2  -9    4.10    7.40 
 -10   2   9    2.60   11.10 
  10   2  -9    0.60    8.10 
  -9  -2   9   13.60    7.10 
   9  -2  -9    0.50   12.30 
  -9  -2   9    2.90    3.50 
   9  -2  -9   -0.60    6.70 
  -9  -2   9   -0.70    7.10 
  -9   2   9    3.40    6.40 
  -9   2   9   -3.50    6.90 
  -9   2   9    3.00   10.40 
   9   2  -9    7.10   11.10 
   9   2  -9   -2.80    6.40 
   9   2  -9    6.60    5.60 
  -8  -2   9    6.30    6.80 
   8  -2  -9    2.70    5.70 
  -8  -2   9   12.10    6.70 
  -8  -2   9   -2.90    6.50 
   8  -2  -9   21.10    9.40 
   8  -2  -9   11.80   11.10 
  -8   2   9    2.70    6.40 
  -8   2   9    4.30    9.20 
   8   2  -9    1.50    5.50 
   8   2  -9    5.70    6.70 
  -8   2   9    2.80    7.20 
   7  -2  -9   52.59   14.20 
   7  -2  -9   38.60   12.80 
  -7  -2   9   28.50   13.20 
  -7  -2   9   64.49   13.40 
  -7  -2   9   69.69   13.70 
   7  -2  -9   57.99   16.90 
   7   2  -9   47.80   13.10 
  -7   2   9   54.99   15.10 
   7   2  -9   35.00   12.70 
   7   2  -9   70.49   16.60 
  -7   2   9   60.39   13.70 
  -6  -2   9   -0.20    5.50 
  -6  -2   9   -1.00    5.30 
   6  -2  -9    8.10    8.10 
   6  -2  -9    0.10    4.20 
   6  -2  -9   -3.10    9.90 
  -6  -2   9    2.00    5.50 
  -6   2   9   -6.20    6.60 
  -6   2   9   -8.90    5.00 
   6   2  -9   25.10   11.80 
   6   2  -9    0.10    4.40 
   6   2  -9   -1.40    4.80 
  -6   2   9   -3.50    5.10 
   5  -2  -9   50.49   13.40 
  -5  -2   9   29.70   11.00 
  -5  -2   9   66.09   11.60 
   5  -2  -9   55.29   12.70 
   5  -2  -9   35.10   10.30 
  -5  -2   9   46.70   10.70 
   5   2  -9   74.39   16.40 
  -5   2   9   42.20   12.60 
   5   2  -9   36.60   10.40 
  -5   2   9   38.50   10.60 
   5   2  -9   19.50    9.90 
  -5   2   9   22.20   10.60 
  -4  -2   9    0.30    6.30 
   4  -2  -9    2.50    8.90 
   4  -2  -9    4.90    7.50 
  -4  -2   9   -2.70    4.70 
   4  -2  -9    0.30    3.50 
   4   2  -9    3.30    3.80 
  -4   2   9   -0.60    5.70 
  -4   2   9    3.90    4.50 
   4   2  -9   -2.60    8.40 
   4   2  -9    2.40    4.70 
  -4   2   9    1.60    5.80 
   3  -2  -9    6.60    6.80 
   3  -2  -9   15.70    9.40 
  -3  -2   9    1.60    5.10 
  -3  -2   9   -4.70    4.40 
   3  -2  -9    0.20    3.20 
  -3   2   9   -2.00    4.10 
   3   2  -9   -1.30    8.90 
  -3   2   9   -1.40    5.00 
   3   2  -9    1.50    4.30 
   3   2  -9    2.00    4.20 
  -3   2   9   -2.10    6.40 
   2  -2  -9   66.69   18.70 
   2  -2  -9  101.49   21.60 
  -2  -2   9   87.89   20.50 
  -2  -2   9  107.89   19.40 
   2   2  -9   89.49   19.00 
  -2   2   9   63.39   19.80 
   2   2  -9  117.89   22.10 
  -2   2   9   81.39   19.50 
  -2   2   9   83.59   19.10 
   2   2  -9   78.59   19.00 
  -1  -2   9   10.20    7.20 
   1  -2  -9   11.40    4.40 
  -1  -2   9   19.50    5.80 
   1  -2  -9   11.40    7.80 
  -1   2   9   11.60    7.00 
  -1   2   9   19.80    5.60 
   1   2  -9   14.40    6.00 
   1   2  -9   15.70    8.40 
   1   2  -9    6.00    4.20 
  -1   2   9    0.90    6.70 
   0  -2  -9   42.50   10.80 
   0  -2   9   20.20    9.90 
   0  -2   9   41.90    9.00 
   0   2   9   16.20    9.60 
   0   2   9   35.30    8.80 
   0   2  -9   55.39   12.20 
   0   2  -9   33.60    8.90 
   0   2  -9   29.30    8.50 
   0   2   9   30.90   10.10 
   1  -2   9  314.07   61.19 
  -1  -2  -9  248.68   60.99 
  -1  -2  -9  310.77   61.89 
   1  -2   9  274.67   61.89 
   1   2   9  274.47   61.19 
   1   2   9  244.58   61.79 
  -1   2  -9  279.77   61.09 
   1   2   9  285.17   61.09 
  -1   2  -9  328.77   62.19 
  -1   2  -9  298.57   61.19 
   2  -2   9   62.99   14.50 
  -2  -2  -9   58.59   15.50 
   2  -2   9   45.40   15.70 
  -2   2  -9   90.59   17.30 
   2   2   9   44.10   15.70 
   2   2   9   60.49   14.40 
  -3  -2  -9   85.59   16.20 
   3  -2   9   65.09   16.40 
  -3  -2  -9   49.00   13.60 
  -3   2  -9   54.89   13.80 
   3   2   9   48.90   13.90 
  -3   2  -9   57.29   13.30 
   3   2   9   76.29   17.30 
   3   2   9   79.09   14.50 
  -4  -2  -9   49.10   13.80 
   4  -2   9   74.09   16.80 
   4  -2   9   82.69   15.30 
  -4  -2  -9   86.09   16.80 
  -4   2  -9   58.59   13.50 
   4   2   9   66.49   13.90 
   4   2   9   39.30   15.40 
  -4   2  -9   46.30   13.70 
   5  -2   9    7.40    6.30 
  -5  -2  -9   -2.80    7.20 
   5  -2   9    4.50    7.60 
  -5  -2  -9    5.30    4.00 
   5   2   9    8.10    4.50 
   5   2   9    4.00    7.40 
  -5   2  -9    2.40    3.70 
   5   2   9   14.50    6.40 
  -5   2  -9   10.60    9.10 
  -5   2  -9    6.10    4.30 
   6  -2   9    9.30    8.00 
   6  -2   9   17.60    7.50 
  -6  -2  -9   12.20    9.70 
  -6  -2  -9    6.00    4.90 
   6   2   9   -0.30    8.20 
   6   2   9    7.00    4.90 
  -6   2  -9    5.50   11.10 
  -6   2  -9    3.70    4.80 
   6   2   9   18.60    8.40 
  -7  -2  -9  -16.80    8.80 
   7  -2   9    0.80    7.60 
  -7  -2  -9    0.10    4.30 
   7  -2   9   -9.70    7.50 
   7   2   9   13.10    8.40 
   7   2   9    3.20    4.70 
  -7   2  -9    2.60    4.20 
  -7   2  -9   10.00   11.00 
   7   2   9    5.10    8.80 
   8  -2   9   -1.00    8.30 
  -8  -2  -9    6.80    9.60 
  -8  -2  -9   -0.50    5.40 
   8  -2   9   -6.50    9.10 
  -8   2  -9   13.20   10.00 
   8   2   9    3.70    5.00 
   8   2   9   15.90    8.60 
  -8   2  -9    5.40    5.30 
   8   2   9    1.30    9.60 
  -9  -2  -9   -2.90   13.00 
   9  -2   9   15.10   10.40 
   9  -2   9   39.10   12.30 
  -9  -2  -9    8.30    5.60 
  -9   2  -9    8.50    6.20 
   9   2   9   11.90    5.60 
   9   2   9    7.50   12.20 
 -10  -2  -9    0.90    6.50 
  10  -2   9    5.50   12.10 
 -10  -2  -9    5.30   11.50 
  10  -2   9  -14.20   11.20 
 -10   2  -9   -2.20    5.80 
  10   2   9   10.30   11.50 
  10   2   9    4.40    5.10 
  11  -2   9   11.60   12.70 
  11  -2   9   17.10   16.70 
 -11  -2  -9   -4.30   13.70 
 -11  -2  -9    2.90    7.80 
  11   2   9    5.50    5.30 
  11   2   9   21.80   13.80 
 -11   2  -9    4.40    8.80 
  12  -2   9   15.10   13.70 
  12  -2   9   -5.80   17.70 
 -12  -2  -9  -21.70   13.30 
 -12  -2  -9    8.40    8.50 
 -12   2  -9    0.70   18.00 
 -12   2  -9   -2.20    8.20 
  12   2   9    5.90   17.40 
  12   2   9    3.70   17.00 
  13  -2   9   -3.50   17.50 
  13  -2   9   15.30   18.90 
 -13  -2  -9    1.60   16.00 
 -13  -2  -9    9.70   11.00 
  13  -2   9   71.29   27.20 
 -13  -2  -9  -11.90   21.70 
  13   2   9   -7.30   18.70 
 -13   2  -9   28.10   19.30 
  13   2   9   12.10   18.40 
 -13   2  -9   18.50   11.40 
 -14  -2  -9    4.00   17.40 
  14  -2   9   68.39   25.20 
  14  -2   9   41.80   32.10 
 -14  -2  -9  -19.90   20.70 
  14   2   9  -11.70   20.70 
 -14   2  -9    6.60   11.60 
  14  -3  -9  -53.49   30.00 
 -14  -3   9   15.60   15.90 
 -14  -3   9  -16.10   17.70 
 -14  -3   9    5.00   13.80 
  14  -3  -9  -11.10   16.10 
  14  -3  -9   14.40   16.40 
  14   3  -9   18.00   18.20 
 -14   3   9   -7.20   15.20 
  13  -3  -9   15.60   15.80 
 -13  -3   9   -7.50   15.10 
 -13  -3   9   16.30   13.90 
 -13  -3   9  -11.40   20.00 
  13  -3  -9   17.00   15.10 
  13  -3  -9  -20.40   21.80 
 -13   3   9    3.10   13.20 
 -13   3   9   -2.30   12.80 
  13   3  -9    5.60   17.60 
  13   3  -9  -50.69   22.50 
  12  -3  -9    5.30   12.80 
  12  -3  -9   21.00   13.70 
 -12  -3   9    4.30   11.80 
  12  -3  -9  -17.70   20.20 
 -12  -3   9    6.70   11.40 
 -12   3   9   22.10   11.40 
  12   3  -9   -1.00   14.60 
  12   3  -9  -13.00   21.20 
 -12   3   9   -3.10   12.90 
  11  -3  -9    4.90   18.90 
  11  -3  -9    8.00   11.00 
 -11  -3   9    7.20   12.60 
 -11  -3   9   25.70   10.40 
 -11   3   9   20.40   11.90 
  11   3  -9  -26.00   18.60 
  11   3  -9   10.50   12.40 
  10  -3  -9   -1.90   10.00 
  10  -3  -9  -26.70   15.80 
 -10  -3   9   17.70   10.00 
 -10  -3   9   13.70    9.90 
  10  -3  -9  -18.70   18.20 
 -10  -3   9    4.10    8.50 
  10   3  -9   14.80   10.60 
  10   3  -9  -15.00   10.00 
 -10   3   9   -0.30   10.20 
 -10   3   9   -1.00    8.30 
   9  -3  -9    7.00   15.00 
  -9  -3   9   -3.00    8.00 
   9  -3  -9  -13.60   11.30 
  -9  -3   9    7.70    7.90 
  -9  -3   9   -9.40    8.50 
   9  -3  -9    2.20    8.60 
   9   3  -9   -1.20    8.20 
  -9   3   9    5.10    9.30 
  -9   3   9   -7.80    8.10 
   9   3  -9  -11.90   14.50 
   9   3  -9    5.30    9.20 
  -9   3   9   -2.30   13.30 
  -8  -3   9   10.80    9.30 
   8  -3  -9   28.50   14.40 
  -8  -3   9   10.30    7.90 
   8  -3  -9   34.80   12.80 
  -8  -3   9   18.30    8.50 
   8  -3  -9    9.60   13.80 
  -8   3   9   15.00    8.40 
  -8   3   9   20.00   13.00 
   8   3  -9   23.80    9.00 
   8   3  -9   20.30   10.20 
  -8   3   9    8.30    9.00 
   8   3  -9   40.70   14.20 
   7  -3  -9   22.50   12.80 
   7  -3  -9   10.10   11.10 
  -7  -3   9    8.80    8.20 
   7  -3  -9    1.70    6.00 
  -7  -3   9   15.40    7.00 
  -7  -3   9    2.60    6.20 
  -7   3   9   -1.90    7.40 
  -7   3   9    6.10   11.90 
  -7   3   9    2.40    7.70 
   7   3  -9    7.20    7.20 
   7   3  -9    4.50    6.80 
   7   3  -9   26.00   13.40 
  -6  -3   9    5.80    7.20 
   6  -3  -9   14.90   11.40 
   6  -3  -9   -1.90    5.10 
  -6  -3   9    1.30    6.60 
   6  -3  -9    7.70   10.10 
  -6  -3   9    4.80    6.60 
  -6   3   9    8.90    6.40 
  -6   3   9    4.30    6.80 
   6   3  -9    7.60    6.20 
  -6   3   9    6.50   13.70 
   6   3  -9   10.20    7.90 
   6   3  -9   -6.10   12.30 
   5  -3  -9    6.90    4.80 
  -5  -3   9   11.40    6.90 
  -5  -3   9    2.80    5.70 
  -5  -3   9    4.90    5.70 
   5  -3  -9    6.40    9.50 
   5  -3  -9    2.00   10.40 
  -5   3   9   11.70    5.00 
  -5   3   9    5.20    6.10 
   5   3  -9    6.00    5.80 
  -5   3   9   -4.50    8.80 
   5   3  -9    7.20   11.70 
   5   3  -9    3.90    6.30 
  -4  -3   9   49.20   12.50 
   4  -3  -9   25.70    9.40 
  -4  -3   9   48.70   10.80 
   4  -3  -9   43.80   14.70 
   4  -3  -9   42.40   13.40 
  -4  -3   9   26.20   10.90 
   4   3  -9   50.69   15.00 
   4   3  -9   34.40   10.00 
  -4   3   9   48.90    9.90 
  -4   3   9   25.30   10.50 
  -4   3   9   39.90   14.20 
   4   3  -9   30.40   11.10 
  -3  -3   9   80.39   18.20 
  -3  -3   9   76.19   17.00 
   3  -3  -9  110.49   19.50 
   3  -3  -9   52.79   16.00 
   3   3  -9   65.89   16.40 
  -3   3   9   57.69   17.80 
   3   3  -9   98.19   19.00 
  -3   3   9   75.89   16.50 
   2  -3  -9   32.70    9.30 
  -2  -3   9   14.90    8.50 
   2  -3  -9   13.20    6.20 
   2  -3  -9   40.40   10.20 
  -2  -3   9   24.90    7.00 
  -2   3   9    8.10    7.30 
   2   3  -9   39.60   12.00 
  -2   3   9   27.00    6.70 
   2   3  -9   28.60    7.10 
  -2   3   9    8.80    9.00 
   2   3  -9   15.30    7.70 
  -1  -3   9  106.99   20.80 
   1  -3  -9  124.69   22.10 
   1  -3  -9   83.29   20.50 
  -1  -3   9   72.89   21.90 
   1   3  -9   76.19   21.10 
  -1   3   9   98.39   20.60 
   1   3  -9  108.29   23.10 
  -1   3   9   77.19   21.50 
   1   3  -9   97.49   20.70 
   0  -3   9   48.30   14.50 
   0  -3  -9   60.99   13.50 
   0  -3   9   59.19   12.40 
   0  -3  -9   34.00   11.80 
   0   3   9   46.60   14.80 
   0   3  -9   50.69   12.00 
   0   3   9   51.39   12.20 
   0   3  -9   59.89   13.70 
   0   3  -9   64.19   14.50 
  -1  -3  -9    8.30    6.50 
   1  -3   9    1.00    7.40 
   1  -3   9    5.00    4.70 
  -1  -3  -9   -1.30    3.50 
  -1   3  -9   11.70    8.40 
   1   3   9    5.40    4.00 
   1   3   9  -11.20    5.90 
  -1   3  -9   -0.60    4.90 
  -1   3  -9    1.50    3.70 
  -2  -3  -9    4.10    4.00 
  -2  -3  -9   17.60    7.30 
   2  -3   9    4.60    8.20 
   2   3   9    4.70    7.70 
  -2   3  -9    4.40    4.50 
   2   3   9   10.00    5.50 
  -2   3  -9   16.60    8.30 
   2   3   9    6.70    7.60 
  -2   3  -9    8.30    5.20 
   3  -3   9    0.70    5.60 
  -3  -3  -9    8.50    7.80 
   3  -3   9   -1.50    7.50 
  -3   3  -9    3.20    5.50 
   3   3   9    3.20    7.10 
  -3   3  -9    6.90    8.10 
   3   3   9   12.00    6.30 
   3   3   9    7.70    8.00 
  -4  -3  -9   15.00    8.10 
   4  -3   9    0.20    7.80 
   4  -3   9    2.40    6.50 
  -4  -3  -9   16.20    5.30 
  -4   3  -9    4.40    4.90 
  -4   3  -9   15.10    9.30 
   4   3   9    7.30    6.30 
   4   3   9    2.00    9.80 
  -4   3  -9    2.70    5.30 
   4   3   9   -4.70    6.50 
  -5  -3  -9   33.20    8.90 
   5  -3   9   23.10   11.90 
   5  -3   9   62.99   12.30 
  -5  -3  -9   40.70   11.70 
   5   3   9   35.90   10.80 
  -5   3  -9   22.60    8.60 
   5   3   9   29.90   11.00 
   5   3   9   40.50   13.80 
  -5   3  -9   20.10    8.90 
   6  -3   9   28.50   10.20 
   6  -3   9   19.00   11.30 
  -6  -3  -9   14.40   10.40 
  -6   3  -9   13.00   10.90 
  -6   3  -9    8.30    7.20 
   6   3   9    9.90   11.30 
  -6   3  -9   18.00    7.10 
   6   3   9   26.50    9.70 
   6   3   9   30.40    9.60 
  -7  -3  -9   -2.00    5.40 
   7  -3   9   23.50   11.80 
   7  -3   9   18.40   10.20 
  -7  -3  -9   16.80   10.80 
   7   3   9    2.30   11.10 
  -7   3  -9   -1.30   11.60 
  -7   3  -9    5.80    5.70 
   7   3   9    9.10    8.00 
   7   3   9   10.70    9.00 
  -7   3  -9    4.20    6.50 
   8  -3   9   90.69   18.80 
  -8  -3  -9   87.79   18.00 
  -8  -3  -9   43.40   13.70 
   8  -3   9   33.80   17.20 
   8   3   9   41.10   18.10 
   8   3   9   85.69   18.90 
  -8   3  -9   39.60   13.80 
   8   3   9   44.80   13.30 
  -9  -3  -9   -6.00   11.70 
  -9  -3  -9   -7.10    7.00 
   9  -3   9   -4.50   11.90 
   9  -3   9    3.80   13.20 
  -9   3  -9  -14.40   14.40 
   9   3   9    7.40    7.60 
  -9   3  -9    6.30    7.20 
   9   3   9   -1.10   14.40 
   9   3   9    9.90   13.80 
  10  -3   9   20.10   13.50 
 -10  -3  -9    1.70    7.40 
 -10  -3  -9  -12.60   12.00 
  10  -3   9   -8.90   13.90 
 -10  -3  -9    6.40   14.40 
 -10   3  -9    9.20    8.00 
  10   3   9    6.00   17.00 
 -10   3  -9   27.10   16.00 
  10   3   9   -0.40   14.70 
  11  -3   9    2.30   16.70 
  11  -3   9   -7.10   26.40 
  11  -3   9   11.90   16.00 
 -11  -3  -9   55.89   16.20 
 -11  -3  -9   23.70   18.10 
 -11  -3  -9   11.10    9.70 
  11   3   9   -9.00   17.40 
 -11   3  -9    8.10    9.30 
  11   3   9   -6.10   17.10 
 -11   3  -9   24.10   17.00 
  12  -3   9    7.90   30.30 
  12  -3   9   15.20   17.90 
 -12  -3  -9   20.40   20.70 
 -12  -3  -9   -6.70    9.70 
  12  -3   9    7.00   18.80 
 -12  -3  -9    6.60   16.10 
 -12   3  -9   -8.10   10.90 
  12   3   9    6.90   29.30 
 -13  -3  -9  -22.90   17.60 
 -13  -3  -9    6.70   22.60 
  13  -3   9   51.09   36.90 
  13  -3   9   -3.70   23.90 
 -13   3  -9    5.00   12.80 
  13   3   9    2.40   22.10 
  12  -4  -9   -2.20   16.20 
  12  -4  -9   23.20   27.50 
 -12  -4   9   31.00   14.00 
  12  -4  -9   20.10   27.10 
 -12  -4   9  -13.80   15.70 
 -12  -4   9    8.40   15.30 
  12   4  -9  -44.00   29.10 
 -12   4   9   -5.80   14.70 
  12   4  -9   15.50   18.80 
 -12   4   9   31.50   14.60 
 -11  -4   9  -21.40   12.20 
 -11  -4   9    7.40   11.80 
  11  -4  -9    2.00   14.40 
  11  -4  -9    8.10   18.50 
  11  -4  -9  -39.00   23.20 
 -11  -4   9   17.40   13.80 
 -11   4   9   19.20   13.90 
  11   4  -9  -14.60   26.00 
 -11   4   9   27.60   12.50 
  11   4  -9  -16.10   16.30 
  10  -4  -9   18.70   17.00 
  10  -4  -9    1.10   13.10 
 -10  -4   9   11.00   11.20 
 -10  -4   9   -8.80    9.70 
  10  -4  -9   31.10   21.00 
 -10  -4   9    6.70   12.70 
  10   4  -9  -10.20   22.90 
 -10   4   9   -4.20   10.10 
 -10   4   9   13.30   13.00 
  10   4  -9  -18.10   12.40 
  -9  -4   9   -8.80   10.70 
   9  -4  -9    7.10   15.40 
   9  -4  -9    3.00   10.70 
   9  -4  -9    1.60   18.90 
  -9  -4   9    9.10    8.80 
  -9  -4   9   20.60   10.30 
  -9  -4   9    5.30   10.70 
   9   4  -9   -2.10   12.30 
  -9   4   9    2.10   10.80 
  -8  -4   9   27.30   13.50 
  -8  -4   9   40.30   11.60 
   8  -4  -9   19.30   12.50 
   8  -4  -9   79.59   18.50 
  -8  -4   9   47.10   14.50 
  -8   4   9   30.30   12.80 
   8   4  -9   17.20   13.80 
   8   4  -9   39.90   13.90 
   8   4  -9   13.40   21.90 
  -8   4   9   53.49   12.10 
   7  -4  -9    7.50   14.70 
   7  -4  -9    0.10    9.30 
  -7  -4   9    4.00    7.10 
  -7  -4   9   10.90    9.60 
   7  -4  -9    6.10    9.30 
   7   4  -9    0.60    9.90 
  -7   4   9   12.00    6.80 
  -7   4   9    3.30    8.60 
   7   4  -9    7.30   16.70 
   7   4  -9    7.50    9.60 
  -6  -4   9   12.10    7.60 
   6  -4  -9   14.50   21.00 
  -6  -4   9   -6.70   11.70 
   6  -4  -9   25.20   10.40 
   6  -4  -9   -6.50    7.40 
   6   4  -9    2.30   10.00 
  -6   4   9   -0.40   14.20 
  -6   4   9   21.40    7.10 
   6   4  -9   -1.10   14.80 
  -6   4   9   13.70    7.80 
   6   4  -9    3.00    7.70 
   5  -4  -9   20.40   11.10 
  -5  -4   9   12.10    8.70 
  -5  -4   9   15.70    7.60 
   5  -4  -9   21.10   13.80 
   5   4  -9    1.50   14.70 
   5   4  -9   11.00    6.90 
  -5   4   9   13.60   14.70 
  -5   4   9   10.00    6.30 
   5   4  -9   16.30   10.20 
  -4  -4   9   53.79   15.10 
   4  -4  -9   69.49   18.20 
   4  -4  -9   58.59   16.10 
  -4   4   9   57.99   13.60 
   4   4  -9   31.90   14.80 
   4   4  -9   47.20   13.30 
  -4   4   9   47.70   18.40 
   3  -4  -9   -0.60   11.20 
  -3  -4   9    1.20    7.30 
   3  -4  -9    4.70   10.30 
  -3  -4   9   12.00    9.00 
  -3  -4   9   -5.90    6.70 
   3   4  -9    2.00    4.80 
   3   4  -9   19.40   11.80 
  -3   4   9  -11.70   12.20 
   3   4  -9    6.80    8.80 
  -2  -4   9    8.90    5.20 
   2  -4  -9   27.90   11.70 
  -2  -4   9   26.50    9.70 
   2   4  -9    5.20    8.00 
   2   4  -9    2.00    9.80 
  -2   4   9    8.10   12.70 
   1  -4  -9   21.40   10.40 
   1   4  -9    2.60    9.00 
   1   4  -9    1.10    7.90 
   0  -4  -9  -12.40    8.10 
   0  -4   9    1.40    8.10 
   0   4   9    8.50   11.60 
   0   4  -9  -14.60    8.50 
   1  -4   9    3.40    6.60 
  -1   4  -9   15.50    9.10 
  -1   4  -9    3.70   10.90 
   1   4   9    8.90   10.50 
   2  -4   9    9.10    9.50 
   2  -4   9   -0.40    6.20 
   2   4   9    4.20    6.50 
  -2   4  -9    8.30    8.80 
   2   4   9   13.80   11.50 
   2   4   9    7.90   10.70 
  -2   4  -9   -0.60    4.20 
  -2   4  -9   27.40   10.20 
   3  -4   9    0.70    6.40 
   3  -4   9   17.30   10.20 
  -3   4  -9   -4.80   10.30 
   3   4   9   14.90    8.00 
  -3   4  -9    0.10    4.80 
  -3   4  -9    4.90    9.90 
   3   4   9   14.80   11.10 
   4  -4   9    1.30    8.20 
  -4  -4  -9    1.10    5.20 
   4  -4   9   26.70   12.00 
  -4  -4  -9   -9.70    8.60 
   4   4   9    5.40   10.70 
  -4   4  -9   15.80   11.50 
  -4   4  -9   11.60    5.60 
   4   4   9   -3.70   10.70 
   4   4   9   -1.60    8.50 
  -4   4  -9   26.10   11.50 
  -5  -4  -9   -9.60    9.00 
   5  -4   9   12.50    9.80 
   5  -4   9   35.50   13.80 
  -5   4  -9   -5.70   12.20 
   5   4   9   15.60   11.30 
  -5   4  -9   22.10   11.00 
   5   4   9   30.60   11.00 
   5   4   9    7.20   11.50 
   6  -4   9   -4.40   12.60 
   6  -4   9   -7.70    9.90 
  -6  -4  -9    5.00    5.90 
  -6  -4  -9   22.30   10.50 
   6   4   9  -19.10   11.90 
   6   4   9    6.20   11.20 
  -6   4  -9   10.70    7.40 
   6   4   9   -8.50   13.20 
  -6   4  -9   -5.80   12.80 
  -6   4  -9   18.20    9.70 
  -7  -4  -9  -13.50   10.30 
  -7  -4  -9    8.00   15.70 
   7  -4   9   15.60   12.30 
   7  -4   9   15.80   14.30 
  -7  -4  -9   -1.30    6.40 
  -7   4  -9    7.90    7.50 
   7   4   9   -4.30   18.40 
  -7   4  -9   11.30   10.40 
   7   4   9  -15.50   14.50 
  -8  -4  -9    6.60    7.30 
   8  -4   9   -2.70   14.60 
  -8  -4  -9   -2.90   12.40 
   8  -4   9   14.80   15.00 
   8  -4   9   10.90   24.00 
  -8  -4  -9    1.50   16.30 
   8   4   9    8.00   15.00 
  -8   4  -9    5.50   10.90 
  -8   4  -9    9.30    8.20 
   8   4   9    6.70   16.40 
  -8   4  -9   18.20   16.30 
   9  -4   9   36.30   18.30 
  -9  -4  -9    9.90   18.40 
   9  -4   9   53.89   28.80 
   9  -4   9   11.00   15.70 
  -9  -4  -9   18.90    9.90 
  -9  -4  -9   52.09   15.80 
   9   4   9   14.40   19.20 
   9   4   9   16.70   17.70 
  -9   4  -9   23.50   11.00 
  -9   4  -9  -13.60   17.50 
  10  -4   9   38.20   21.20 
 -10  -4  -9    5.00   10.00 
  10  -4   9  -22.00   17.10 
 -10  -4  -9   34.70   23.50 
 -10  -4  -9   24.00   14.90 
  10   4   9   19.30   19.80 
  10   4   9  -20.40   20.30 
 -10   4  -9   -1.70   11.00 
 -10   4  -9   30.60   20.50 
 -11  -4  -9   -3.50   11.90 
  11  -4   9   27.60   22.80 
 -11   4  -9   12.00   12.40 
  11   4   9   24.10   23.10 
  -9  -5   9   44.70   14.40 
  -9  -5   9   38.30   13.80 
  -9   5   9   -6.40   11.40 
   9   5  -9   18.40   29.60 
  -8  -5   9   29.00   15.20 
   8  -5  -9   30.00   14.50 
  -8  -5   9    9.70   11.30 
  -8  -5   9   25.50   12.10 
   8   5  -9    6.80   25.90 
   8   5  -9   12.30   15.10 
  -7  -5   9   25.70   16.70 
  -7  -5   9    8.50   13.30 
   7  -5  -9   33.30   21.60 
   7  -5  -9   30.70   24.80 
   6  -5  -9   10.50   19.40 
   6  -5  -9   14.50   14.50 
  -6  -5   9    0.80   12.60 
  -6  -5   9   65.59   22.20 
   6   5  -9   10.80   21.30 
   5  -5  -9   25.10   17.70 
  -5  -5   9    4.00   11.00 
  -5  -5   9   18.60   18.80 
   5  -5  -9   -1.90   14.10 
   5   5  -9   -2.10   13.30 
   5   5  -9   25.80   17.50 
  -4  -5   9    7.50   19.70 
  -4  -5   9    6.80   11.30 
   4  -5  -9   18.80   13.90 
   4  -5  -9   17.60   16.70 
   4   5  -9   -5.00   13.30 
  -3  -5   9   -7.50   18.60 
  -3  -5   9  -17.60   10.00 
   3  -5  -9   19.50   14.20 
   3  -5  -9   -1.70   14.70 
   3   5  -9    2.60   12.40 
   2  -5  -9   17.40   14.70 
  -2  -5   9   41.30   21.10 
  -2  -5   9    5.10   10.90 
   2  -5  -9   30.70   15.90 
  -1  -5   9   34.20   21.10 
   1  -5  -9  -21.50   12.60 
   1   5  -9   -2.20   12.20 
   0  -5  -9    9.40   13.50 
   0  -5  -9   -7.30   15.30 
   0  -5   9   18.40   20.60 
   0   5  -9   -5.30   12.10 
  -1  -5  -9  -12.00   16.40 
   1  -5   9   17.70   22.30 
  -1   5  -9   -2.40   12.80 
  -2  -5  -9   29.50   17.90 
   2  -5   9    5.30   22.50 
  -2   5  -9   18.10   13.90 
   3  -5   9   28.10   24.90 
  -3  -5  -9   35.80   19.50 
  -3   5  -9    3.50   14.30 
  -4  -5  -9   -2.20   18.80 
   4  -5   9   -9.10   24.80 
  -4   5  -9   23.90   15.70 
  -5  -5  -9    7.20   20.50 
   5  -5   9   -9.00   27.20 
  -5   5  -9   -0.10   15.00 
  -6   5  -9    0.80   14.00 
  -6   5  -9    2.30   14.40 
  -6   5  -9   -2.00    7.70 
   7   5   9   23.40   18.40 
  -7   5  -9  -21.60   15.90 
  17   0 -10  -84.59   41.40 
 -17   0  10   16.40   18.00 
  17   0 -10    5.20   23.00 
 -16   0  10   16.30   15.00 
  16   0 -10   15.30   16.40 
  16   0 -10    0.80   24.90 
 -16   0  10    4.80   14.70 
 -15   0  10   10.40   13.00 
  15   0 -10  -12.60   13.20 
 -15   0  10   10.30   11.20 
  15   0 -10  -37.60   22.80 
 -14   0  10    2.10   10.30 
  14   0 -10    1.50   11.70 
  14   0 -10   -5.70   19.10 
 -14   0  10   -9.80   11.60 
  13   0 -10   12.70   17.00 
  13   0 -10  -11.90    8.20 
 -13   0  10   -9.40    8.60 
 -13   0  10    4.00   11.10 
 -13   0  10    7.80   10.00 
  12   0 -10   26.70   18.30 
 -12   0  10    2.80    9.70 
 -12   0  10    7.40    8.90 
  12   0 -10    6.60    6.80 
 -12   0  10    7.90    9.10 
  12   0 -10    1.70    6.50 
 -11   0  10   15.20    7.80 
 -11   0  10    3.90    7.20 
 -11   0  10    9.20    7.80 
  11   0 -10   -7.80   13.80 
  11   0 -10    6.30    5.90 
  10   0 -10   40.10   13.30 
  10   0 -10   18.00    8.30 
  10   0 -10   10.30    6.10 
 -10   0  10   18.30    8.10 
 -10   0  10    6.90    7.20 
 -10   0  10   13.90    7.40 
   9   0 -10   13.10   10.80 
   9   0 -10    2.30    4.60 
  -9   0  10    1.60    6.20 
   9   0 -10    9.80    6.10 
  -9   0  10    3.30    6.50 
  -9   0  10   -1.50    7.10 
  -8   0  10   79.39   17.20 
   8   0 -10   55.09   17.40 
  -8   0  10   92.69   18.30 
   8   0 -10   69.39   16.90 
  -8   0  10   89.19   20.10 
  -7   0  10   19.10    6.50 
  -7   0  10   12.20    6.70 
   7   0 -10    9.90    4.80 
   7   0 -10    6.10    5.60 
  -7   0  10   10.10    5.90 
   7   0 -10   36.40   13.50 
   6   0 -10    2.20    4.10 
   6   0 -10    4.20   10.00 
  -6   0  10    3.40    5.10 
  -6   0  10    4.00    6.60 
  -6   0  10    0.30    5.60 
   5   0 -10    6.70    5.70 
   5   0 -10   11.70   10.90 
  -5   0  10    6.50    5.70 
  -5   0  10   12.60    6.20 
   4   0 -10  171.38   39.20 
   4   0 -10  180.78   41.50 
  -4   0  10  190.18   39.40 
   3   0 -10  811.72  159.88 
  -3   0  10  685.03  159.38 
  -3   0  10  727.43  158.78 
   3   0 -10  761.02  158.88 
  -2   0  10  990.60  205.88 
   2   0 -10 1009.30  206.78 
   2   0 -10  949.40  205.88 
  -2   0  10  916.91  206.38 
   1   0 -10   50.59   15.50 
   1   0 -10   40.70   10.40 
  -1   0  10   45.40   11.00 
  -1   0  10   34.30   11.90 
   0   0 -10   16.10    6.40 
   0   0  10   17.80    6.90 
   0   0 -10   25.10   10.50 
   0   0  10   17.00    8.00 
   1   0  10   60.19   13.50 
   1   0  10   42.30   15.10 
  -1   0 -10   46.20   15.00 
   2   0  10   41.30   13.10 
  -2   0 -10   78.49   15.30 
  -2   0 -10   43.70   12.00 
  -3   0 -10  182.38   39.10 
   3   0  10  156.38   38.50 
   3   0  10  186.28   38.00 
  -3   0 -10  165.98   37.40 
   4   0  10   67.09   19.80 
  -4   0 -10  101.09   20.80 
  -4   0 -10   69.99   18.30 
   4   0  10   94.39   19.20 
   5   0  10   -1.70    5.20 
  -5   0 -10    0.10    2.90 
   5   0  10    5.70    6.00 
  -5   0 -10   -3.40    8.50 
  -6   0 -10   -5.90    9.20 
  -6   0 -10   -1.00    4.00 
   6   0  10    7.10    7.60 
   6   0  10   -8.10    5.70 
  -7   0 -10   11.60    9.80 
   7   0  10    6.90    6.70 
  -7   0 -10    3.70    4.10 
   7   0  10    7.70    8.00 
   8   0  10   25.40   10.00 
  -8   0 -10   25.20   10.40 
  -8   0 -10    8.10    5.90 
   8   0  10    3.30    7.80 
   9   0  10    3.60   12.60 
   9   0  10   19.00   11.20 
  -9   0 -10   38.90   12.40 
  10   0  10   10.90   10.40 
 -10   0 -10    3.40    5.50 
  10   0  10    6.70    9.80 
 -10   0 -10   12.60   12.00 
  11   0  10   -5.70   12.60 
 -11   0 -10   -7.00   12.40 
 -11   0 -10   -1.70    6.70 
  12   0  10   -0.80   12.50 
 -12   0 -10   -1.50    7.30 
 -12   0 -10   -6.80   15.50 
  12   0  10   11.70   14.10 
 -13   0 -10   -2.50    8.00 
  13   0  10   20.40   15.80 
  13   0  10    8.80   17.50 
 -13   0 -10   29.80   17.20 
  14   0  10   30.70   20.40 
 -14   0 -10   60.49   19.60 
 -14   0 -10   10.00   12.20 
  14   0  10    2.00   19.40 
 -15   0 -10    7.20   12.20 
 -16  -1  10   -3.00   15.90 
  16  -1 -10   20.40   19.10 
 -16  -1  10   23.30   15.50 
  16  -1 -10   47.30   27.20 
  16   1 -10  -27.80   20.20 
 -16   1  10   34.50   18.30 
  16   1 -10   53.19   28.50 
  15  -1 -10   14.80   14.30 
 -15  -1  10    7.00   14.70 
 -15  -1  10  -10.10   12.70 
  15  -1 -10   -1.90   23.40 
 -15   1  10    4.80   13.00 
  15   1 -10   12.40   22.40 
  15   1 -10    7.90   14.40 
 -15   1  10   18.90   14.70 
 -14  -1  10   -6.60   12.30 
  14  -1 -10   -4.00   12.50 
 -14  -1  10   -0.50   11.40 
  14  -1 -10   26.80   18.90 
  14   1 -10   17.60   19.20 
 -14   1  10    3.30   11.50 
  14   1 -10    9.80   14.30 
 -14   1  10   -7.70   11.20 
  13  -1 -10    7.30    9.70 
  13  -1 -10    1.90   18.30 
 -13  -1  10    2.70   10.40 
 -13  -1  10    7.00    9.60 
  13   1 -10   19.80   19.20 
  13   1 -10    2.20   10.10 
 -13   1  10    4.60   11.80 
 -13   1  10    3.50    9.50 
 -12  -1  10    0.50    8.10 
  12  -1 -10    0.20    8.50 
  12  -1 -10   40.30   17.40 
 -12  -1  10   -2.80    7.10 
 -12  -1  10   18.90   10.20 
 -12   1  10   -3.20   10.10 
  12   1 -10    2.20   14.40 
 -12   1  10    9.60    8.90 
 -12   1  10   11.00    9.60 
  12   1 -10    0.80    7.80 
  12   1 -10  -16.40    9.80 
 -11  -1  10    6.70    6.00 
  11  -1 -10   44.90   14.50 
 -11  -1  10    0.60    7.70 
 -11  -1  10   -2.20    7.40 
  11  -1 -10   -3.90    7.70 
  11   1 -10   -2.70    7.00 
 -11   1  10   -6.20    8.60 
 -11   1  10    3.40    9.60 
  11   1 -10    4.30    6.80 
 -11   1  10   -5.00    7.60 
  11   1 -10   11.20   13.50 
 -10  -1  10   20.80   11.00 
  10  -1 -10   14.70   14.60 
 -10  -1  10   41.70   10.00 
 -10  -1  10   49.70   10.90 
  10  -1 -10   62.69   16.20 
 -10   1  10   18.60   12.20 
 -10   1  10   39.10   12.00 
 -10   1  10   28.40   11.60 
  10   1 -10   29.10    9.70 
  10   1 -10   67.39   17.60 
  10   1 -10   15.40    9.10 
  -9  -1  10    0.50    6.30 
   9  -1 -10   -2.00    4.60 
  -9  -1  10   -1.60    6.10 
   9  -1 -10   -2.20    9.90 
  -9  -1  10    2.70    5.50 
   9   1 -10    0.20    4.90 
   9   1 -10   -7.40   12.20 
   9   1 -10    2.80    6.00 
  -9   1  10    9.60    7.30 
  -9   1  10    4.30    7.50 
  -9   1  10   -3.60    6.10 
   8  -1 -10    5.70   12.60 
  -8  -1  10    7.80    6.40 
  -8  -1  10    7.70    4.60 
   8  -1 -10   -0.80    4.70 
  -8  -1  10    0.80    6.90 
  -8   1  10    4.10    7.30 
   8   1 -10    9.30   11.80 
   8   1 -10   -4.30    4.70 
  -8   1  10   21.70    6.40 
   8   1 -10    6.50    6.90 
  -8   1  10    1.70    5.70 
  -7  -1  10    4.10    5.30 
   7  -1 -10    4.50    5.50 
   7  -1 -10   10.80   11.60 
  -7  -1  10   -3.90    4.90 
   7   1 -10   -1.60    4.10 
  -7   1  10    7.40    5.60 
  -7   1  10    1.00    4.70 
   7   1 -10   10.90   10.40 
  -7   1  10    4.30    6.70 
   7   1 -10   12.60    6.20 
   6  -1 -10   44.20   13.30 
  -6  -1  10    5.80    6.50 
   6  -1 -10   17.10    6.50 
  -6  -1  10   38.80    8.30 
   6   1 -10   17.60    6.50 
   6   1 -10   36.40   12.90 
  -6   1  10   31.30    8.20 
  -6   1  10    7.60    6.80 
   6   1 -10   15.90    6.30 
  -6   1  10   28.10    8.30 
  -5  -1  10    1.90    5.70 
  -5  -1  10   19.60    6.90 
   5  -1 -10   13.80   10.10 
   5  -1 -10    2.90    3.90 
  -5   1  10    7.60    7.00 
  -5   1  10   14.90    5.90 
  -5   1  10   11.80    7.10 
   5   1 -10    9.00    4.60 
   5   1 -10   11.00    5.00 
   5   1 -10   22.10   10.80 
   4  -1 -10   97.09   23.00 
   4  -1 -10  127.59   26.10 
  -4  -1  10  121.89   23.20 
  -4  -1  10   76.59   23.80 
  -4   1  10   91.39   23.00 
   4   1 -10  109.79   22.70 
   4   1 -10  117.79   26.20 
   4   1 -10   98.69   22.80 
  -4   1  10  103.49   23.20 
  -3  -1  10   49.30   12.00 
  -3  -1  10   44.70   12.80 
   3  -1 -10   72.09   16.00 
   3  -1 -10   44.20   11.90 
   3   1 -10   46.20   11.10 
  -3   1  10   48.50   12.00 
  -3   1  10   40.90   11.80 
  -3   1  10   23.40   12.90 
   3   1 -10   84.99   16.50 
   3   1 -10   49.00   11.70 
   2  -1 -10  210.68   51.09 
  -2  -1  10  231.08   51.99 
   2  -1 -10  262.77   52.89 
  -2  -1  10  255.27   51.29 
  -2   1  10  248.98   51.09 
  -2   1  10  240.28   51.19 
  -2   1  10  213.28   51.89 
   2   1 -10  264.97   52.79 
   2   1 -10  224.18   51.09 
   1  -1 -10  474.35   98.19 
  -1  -1  10  451.65   97.99 
  -1   1  10  398.06   97.79 
   1   1 -10  448.26   97.09 
   1   1 -10  509.75   98.39 
   0  -1 -10    1.60    3.60 
   0  -1 -10    5.50    8.20 
   0  -1  10   11.20    9.00 
   0  -1  10    6.80    4.70 
   0   1 -10    2.80    3.70 
   0   1 -10   16.20    8.90 
   0   1  10    1.90    6.60 
   0   1  10    4.10    4.50 
  -1  -1 -10  175.58   39.30 
  -1  -1 -10  164.58   38.10 
   1  -1  10  179.08   38.20 
   1  -1  10  178.48   39.30 
   1   1  10  179.58   38.20 
   1   1  10  150.78   39.10 
  -1   1 -10  207.18   39.90 
  -1   1 -10  175.18   38.10 
   2  -1  10   14.60    8.60 
   2  -1  10   31.50    7.70 
  -2  -1 -10   15.30    5.90 
  -2  -1 -10   10.70    8.60 
  -2   1 -10   24.00    6.40 
  -2   1 -10   21.10    9.70 
   2   1  10   20.60    7.10 
   2   1  10    7.00    7.50 
   3  -1  10    7.00    5.40 
  -3  -1 -10    5.10    3.70 
   3  -1  10   12.60    6.20 
  -3  -1 -10   21.00    9.60 
  -3   1 -10   10.20    7.40 
  -3   1 -10   11.40    4.10 
   3   1  10    5.60    6.20 
   3   1  10    8.70    5.90 
  -4  -1 -10    8.40    4.50 
   4  -1  10    9.50    7.90 
  -4  -1 -10   19.90    8.50 
   4  -1  10   14.00    6.40 
   4   1  10    9.10    8.50 
  -4   1 -10   16.20    7.80 
  -4   1 -10    7.60    4.60 
   4   1  10   10.90    6.20 
   5  -1  10    4.20    6.00 
   5  -1  10    1.90    5.60 
  -5  -1 -10   -7.00    7.00 
  -5  -1 -10    2.20    4.50 
  -5   1 -10    2.10    3.30 
   5   1  10    1.80    5.80 
  -5   1 -10   18.00   10.00 
   5   1  10   -2.60    5.80 
  -6  -1 -10   -0.30    4.00 
   6  -1  10   -2.50    5.50 
  -6  -1 -10   18.50    8.90 
   6  -1  10   -6.70    6.00 
  -6   1 -10  -10.10    9.40 
   6   1  10   -4.10    6.50 
  -6   1 -10    2.70    4.30 
   6   1  10   -3.20    6.10 
  -7  -1 -10   -0.90    4.30 
   7  -1  10    8.40    7.30 
   7  -1  10    0.60    7.10 
  -7  -1 -10   -5.40    9.10 
  -7   1 -10    8.90   12.40 
   7   1  10    6.90    7.50 
  -7   1 -10    3.50    5.40 
   8  -1  10   -8.20    8.40 
  -8  -1 -10   -7.30    9.60 
   8   1  10   -1.50    9.40 
  -8   1 -10    5.20   10.90 
   8   1  10    2.60    8.60 
  -8   1 -10    3.90    5.00 
   9  -1  10    4.60    8.20 
   9  -1  10   -3.60    9.40 
  -9  -1 -10   11.40    6.30 
  -9  -1 -10    5.70   10.70 
  -9   1 -10    2.00    4.90 
   9   1  10   12.90    9.60 
  -9   1 -10  -13.90   11.10 
   9   1  10    2.80    8.30 
  10  -1  10   32.10   13.20 
 -10  -1 -10    5.20   12.20 
  10  -1  10   -4.30    9.60 
 -10  -1 -10    4.60    7.00 
  10   1  10    7.20   19.10 
  10   1  10    7.60   10.60 
 -10   1 -10   15.30   14.20 
 -11  -1 -10    2.10    6.40 
 -11  -1 -10  -11.70   12.10 
  11  -1  10   33.20   13.00 
  11  -1  10   21.00   12.40 
  11   1  10    6.10   12.00 
  11   1  10    3.80   10.90 
 -11   1 -10   29.00   16.10 
 -11   1 -10    2.60    6.30 
 -12  -1 -10    4.90    7.80 
 -12  -1 -10   -5.90   13.90 
  12  -1  10    5.50   17.80 
  12  -1  10   -1.10   12.10 
 -12   1 -10   18.90   16.60 
  12   1  10    6.00   13.50 
  12   1  10  -24.10   14.20 
 -12   1 -10    0.10    7.40 
 -13  -1 -10   23.40   11.40 
  13  -1  10   10.80   14.30 
 -13  -1 -10    8.60   16.20 
  13  -1  10    3.50   19.70 
 -13   1 -10    8.80    8.20 
  13   1  10   39.50   19.00 
 -13   1 -10   22.40   19.20 
  13   1  10   -7.50   16.00 
  14  -1  10    0.10   17.10 
 -14  -1 -10  -21.10   20.60 
 -14  -1 -10    2.50    9.80 
  14  -1  10  -35.90   21.00 
 -14  -1 -10  -15.30   18.70 
  14   1  10   -4.20   18.00 
 -14   1 -10   10.30   10.80 
 -16  -2  10    1.80   19.30 
  16  -2 -10   -3.90   30.50 
  16   2 -10   58.29   21.10 
 -16   2  10   16.80   19.40 
 -15  -2  10   13.60   15.30 
  15  -2 -10    9.10   18.70 
  15  -2 -10  -30.80   26.30 
 -15  -2  10   27.30   14.80 
 -15   2  10    1.70   15.50 
  15   2 -10   -0.30   19.40 
 -15   2  10   24.10   21.40 
  15   2 -10    7.90   32.30 
  14  -2 -10   -3.10   12.90 
  14  -2 -10   45.80   24.70 
 -14  -2  10    4.80   12.70 
 -14  -2  10   15.00   12.70 
  14   2 -10    7.70   15.90 
  14   2 -10  -51.59   25.00 
 -14   2  10  -12.30   13.90 
 -14   2  10    2.10   11.60 
  13  -2 -10  -20.00   11.50 
  13  -2 -10   -1.80   28.70 
 -13  -2  10    9.20   11.50 
 -13  -2  10  -14.50   11.20 
  13  -2 -10  -10.20   10.80 
 -13   2  10    8.90   13.10 
  13   2 -10   -3.40   13.20 
  12  -2 -10   38.60   20.40 
 -12  -2  10    9.50   10.50 
  12  -2 -10   -3.30   10.80 
  12  -2 -10    8.70   10.10 
  12   2 -10   21.30   11.50 
  12   2 -10    6.10    9.90 
 -12   2  10    0.10   13.10 
 -12   2  10    7.50   10.70 
  11  -2 -10    2.30    9.20 
  11  -2 -10   11.60   15.90 
 -11  -2  10    4.10    8.70 
  11  -2 -10   -0.50   10.10 
 -11  -2  10   10.50    8.50 
  11   2 -10    6.30    9.40 
  11   2 -10    8.10    9.90 
 -11   2  10   13.80    9.30 
 -11   2  10   12.00   12.40 
  10  -2 -10   -3.30   10.00 
 -10  -2  10    3.60    4.40 
  10  -2 -10    2.60    6.80 
 -10  -2  10    6.60    8.30 
 -10  -2  10   -3.40    8.40 
 -10   2  10   -9.90   17.80 
  10   2 -10   -5.30    6.50 
 -10   2  10    0.50    8.40 
  10   2 -10   -1.90    7.60 
 -10   2  10    0.90    7.10 
   9  -2 -10   -2.50   12.80 
  -9  -2  10  -11.80    7.30 
  -9  -2  10    5.70    7.20 
   9  -2 -10  -12.80   10.10 
  -9   2  10   -2.60   10.10 
  -9   2  10   10.80    6.70 
  -9   2  10    6.30    7.50 
   9   2 -10   -5.80   12.30 
   9   2 -10    2.80    7.00 
   9   2 -10    0.70    7.40 
  -8  -2  10   17.50    9.10 
   8  -2 -10   21.30   13.60 
   8  -2 -10   43.50   11.60 
   8  -2 -10   10.70    6.90 
  -8   2  10   11.30    7.70 
   8   2 -10   14.30   12.40 
   8   2 -10   21.10    8.10 
   8   2 -10    4.30    6.30 
  -8   2  10   19.00   10.80 
  -8   2  10    4.80   11.60 
   7  -2 -10    4.00    5.80 
   7  -2 -10   39.90   12.10 
  -7  -2  10   12.20    7.20 
  -7  -2  10    9.90    7.50 
   7  -2 -10   24.50    9.40 
  -7   2  10   17.00   10.20 
   7   2 -10   28.00   11.70 
  -7   2  10    4.10    6.80 
   7   2 -10   14.00    7.10 
   7   2 -10    8.00    6.30 
  -7   2  10   16.90    7.10 
   6  -2 -10   47.30   10.80 
   6  -2 -10   20.80    8.70 
  -6  -2  10   25.40   10.20 
   6  -2 -10   57.39   14.00 
  -6   2  10   43.90   10.00 
  -6   2  10   35.90   12.00 
  -6   2  10   17.70   10.00 
   6   2 -10   28.40    9.40 
   6   2 -10   25.30    8.90 
   6   2 -10   34.60   13.20 
  -5  -2  10   32.00    8.10 
  -5  -2  10   11.30    8.70 
   5  -2 -10   18.50    7.00 
   5  -2 -10   52.79   12.90 
  -5   2  10   26.90    9.60 
  -5   2  10   19.40    9.70 
  -5   2  10   27.50    7.60 
   5   2 -10   25.70    8.10 
   5   2 -10   46.00   12.90 
   5   2 -10   19.50    7.90 
  -4  -2  10    7.80    5.40 
   4  -2 -10    6.30    4.30 
  -4  -2  10    9.10    6.90 
   4  -2 -10    0.50    8.40 
   4  -2 -10   16.20    7.60 
  -4   2  10   10.30    7.20 
   4   2 -10    4.90    5.10 
   4   2 -10    8.30   10.20 
   4   2 -10   -1.00    3.90 
  -4   2  10    3.60    4.80 
  -4   2  10   -0.40    5.60 
  -3  -2  10   35.90   10.30 
   3  -2 -10   19.90   10.00 
  -3  -2  10   29.20    7.10 
   3  -2 -10    9.80    5.30 
   3   2 -10   18.20    6.40 
   3   2 -10   22.40   10.30 
  -3   2  10   13.90    6.30 
  -3   2  10   19.60    8.50 
   3   2 -10   10.40    6.10 
  -3   2  10   17.30    8.10 
  -2  -2  10    8.90    6.20 
   2  -2 -10    8.00    4.70 
   2  -2 -10   22.10   10.30 
  -2  -2  10   11.60    5.80 
   2   2 -10    9.00    4.50 
  -2   2  10    1.40    4.80 
  -2   2  10   13.30    7.00 
   2   2 -10   16.70   10.70 
  -2   2  10    7.30    6.80 
   2   2 -10   12.40    6.20 
   1  -2 -10    8.30    8.60 
  -1  -2  10   -0.90    4.70 
  -1  -2  10    3.80    4.80 
   1  -2 -10    0.00    3.20 
   1   2 -10   -0.80    3.60 
  -1   2  10    0.00    5.50 
  -1   2  10    0.00    6.00 
  -1   2  10   -3.50    4.10 
   1   2 -10    0.60    8.20 
   1   2 -10    0.10    4.30 
   0  -2  10   34.20    7.20 
   0  -2 -10   23.00    9.70 
   0  -2 -10   15.70    6.20 
   0  -2  10   11.30    8.20 
   0   2 -10   19.30    6.70 
   0   2 -10   19.70    6.90 
   0   2  10   25.80    8.00 
   0   2  10   25.90    9.30 
   0   2  10   20.80    6.60 
   0   2 -10   36.00   10.80 
   1  -2  10   54.99   13.90 
  -1  -2 -10   42.00   11.20 
   1  -2  10   63.29   11.60 
   1   2  10   35.50   11.10 
   1   2  10   45.90   11.40 
   1   2  10   57.19   14.10 
  -1   2 -10   40.90   11.10 
  -1   2 -10   39.00   10.80 
  -1   2 -10   68.09   14.40 
  -2  -2 -10   90.99   17.20 
   2  -2  10   60.39   17.30 
  -2   2 -10   65.39   14.80 
   2   2  10   75.59   15.70 
   2   2  10   61.69   17.90 
   2   2  10   52.39   15.00 
  -2   2 -10   85.69   18.20 
   3  -2  10  109.79   27.10 
  -3  -2 -10  111.59   25.60 
  -3  -2 -10  153.88   27.30 
  -3   2 -10  105.09   25.60 
  -3   2 -10  117.39   25.20 
   3   2  10  120.59   25.50 
   3   2  10   93.99   26.80 
   4  -2  10   42.00   14.90 
  -4  -2 -10   44.00   12.90 
  -4   2 -10   84.39   16.40 
   4   2  10   55.09   12.70 
   4   2  10   57.09   16.10 
   4   2  10   57.49   13.90 
  -4   2 -10   55.79   13.40 
  -5  -2 -10   -2.20    4.00 
   5  -2  10    7.20    8.20 
   5  -2  10    1.50    6.50 
  -5  -2 -10   23.60    9.30 
   5   2  10    7.00    6.90 
  -5   2 -10    0.90    8.50 
   5   2  10    2.20    4.90 
   5   2  10    0.60    7.40 
  -5   2 -10   -0.90    3.90
[truncated: 422,538 more chars]
